# Supplementary material for: Synthesis of unsymmetrically tetrasubstituted pyrroles and studies of AIEE in pyrrolo[1,2-a]pyrimidine derivatives
Source: Royal Society of Chemistry journal article supplement (doi:10.1039/d2sc00837h), 2022-01-01
Supplement: d2sc00837h1.pdf [file d2sc00837h1.pdf]

## Supporting Information

### Synthesis of Unsymmetrically Tetrasubstituted Pyrroles and Studies of AIEE in Pyrrolo[1,2-*a*]pyrimidine Derivatives

Taian Li,<sup>[†,a,b]</sup> Mong-Feng Chiou,<sup>[†,b]</sup> Yajun Li,<sup>[b]</sup> Changqing Ye,<sup>[b]</sup> Min Su,<sup>[b]</sup> Mengyu Xue,<sup>[b]</sup> Xiaobin Yuan,<sup>[b]</sup>  
Chuanchuan Wang,<sup>[b]</sup> Wen-Ming Wan,<sup>[b]</sup> Daliang Li\*<sup>[a]</sup> and Hongli Bao\*<sup>[b]</sup>

#### Affiliations:

<sup>[a]</sup> College of Chemistry and Material Science, Biomedical Research Center of South China, College of Life Sciences, Fujian Normal University, 1 Keji Road, Fuzhou, 350117, P. R. China.

E-mail: [daliangli@fjnu.edu.cn](mailto:daliangli@fjnu.edu.cn)

<sup>[b]</sup> Key Laboratory of Coal to Ethylene Glycol and Its Related Technology, State Key Laboratory of Structural Chemistry, Center for Excellence in Molecular Synthesis, Chinese Academy of Sciences, 155 Yangqiao Road West, Fuzhou, Fujian 350002, P. R. of China.

University of Chinese Academy of Sciences, Beijing 100049, P. R. of China.

E-mail: [hlbao@fjirsm.ac.cn](mailto:hlbao@fjirsm.ac.cn)

## Contents

|                                                                                      |     |
|--------------------------------------------------------------------------------------|-----|
| Materials and methods.....                                                           | 3   |
| General procedure A: Synthesis of $\alpha,\beta$ -unsaturated sulfonimines.....      | 4   |
| Characterization data for $\alpha,\beta$ -unsaturated sulfonimines .....             | 7   |
| General procedure B for the synthesis of pyrroles.....                               | 19  |
| General procedure C for the synthesis of pyrrolo[1,2- <i>a</i> ]pyrimidine .....     | 20  |
| Characterization data for pyrroles.....                                              | 21  |
| Mechanism experiments .....                                                          | 31  |
| Theoretical Study.....                                                               | 33  |
| Characterization data for pyrrolo[1,2- <i>a</i> ]pyrimidine .....                    | 35  |
| Supplementary figure of pyrrolo[1,2- <i>a</i> ]pyrimidine .....                      | 40  |
| UV spectrum and PL spectra of pyrrolo[1,2- <i>a</i> ]pyrimidine .....                | 40  |
| Emission spectra of pyrrolo[1,2- <i>a</i> ]pyrimidine in THF and water mixtures..... | 44  |
| Time-dependent emission enhancement after different scan times .....                 | 45  |
| Crystal packing of pyrrolo[1,2- <i>a</i> ]pyrimidine.....                            | 49  |
| Single crystal data .....                                                            | 52  |
| NMR Spectra.....                                                                     | 62  |
| Coordinate of optimized structures.....                                              | 151 |
| References .....                                                                     | 166 |

## Materials and methods

All reactions were carried out under an atmosphere of nitrogen in glassware with magnetic stirring unless otherwise indicated. Commercially obtained reagents were used as received. Solvents were dried by Inert PureSolv MD5. Liquids and solutions were transferred via syringe. All reactions were monitored by thin-layer chromatography. Melting points were measured on a Melt-Temp apparatus and were uncorrected.  $^1\text{H}$ ,  $^{19}\text{F}$ , and  $^{13}\text{C}$  NMR spectra were recorded on Bruker-BioSpin AVANCE III HD and JEOL ECZ600R. Data for  $^1\text{H}$  NMR and  $^{13}\text{C}$  NMR spectra are reported relative to TMS as an internal standard (0 ppm) and are reported as follows: chemical shift (ppm), multiplicity, coupling constant (Hz), and integration. GC-MS data were recorded on Thermo ISQ QD. IR data were obtained from Bruker VERTEX 70. The UV-visible absorption spectra of samples were dissolved in THF (0.001 mg/mL) and recorded on Shimadzu UV2450 UV-Vis spectrophotometer. Photoluminescence (PL) spectra of sample solutions were measured on the Edinburgh Instruments FLS5 fluorescence spectrofluorometer. The absolute fluorescence quantum yield of samples was dissolved in THF (0.1 mg/mL) and measured on the Edinburgh Instruments FLS1000 three monochromator spectrophotometer. X-ray diffraction (XRD) measurement was performed on Rigaku XRD MiniFlex 600. HRMS data were recorded on Bruker Impact II UHR-TOF, Waters Micromass GCT Premier, or Thermo Fisher Scientific LTQ FT Ultra.

## General procedure A: Synthesis of $\alpha,\beta$ -unsaturated sulfonimines

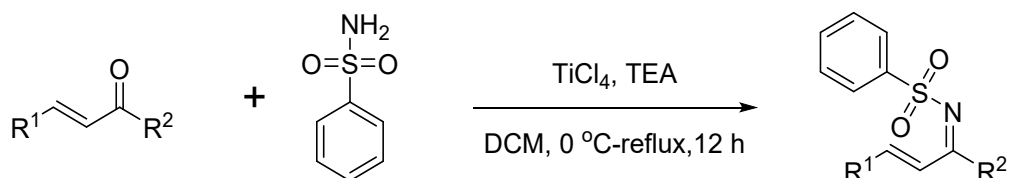

General procedure A :According to the reported synthetic methods for  $\alpha,\beta$ -unsaturated sulfonimines from chalcone,<sup>1</sup> to a solution of benzenesulfonamide (785 mg, 5 mmol) and chalcone (5 mmol) in DCM (20 mL) at  $0\text{ }^\circ\text{C}$ , were successively added  $\text{Et}_3\text{N}$  (2.09 mL, 15 mmol) and  $\text{TiCl}_4$  (0.6 mL, 5 mmol) under a nitrogen atmosphere. The reaction mixture was heated at reflux overnight. The solution was cooled to room temperature, quenched with water (10 mL), and extracted with DCM. The combined organic phase was dried over  $\text{MgSO}_4$  and concentrated. The residue was purified by flash chromatography on silica gel (ethyl acetate and hexane) to afford the corresponding  $\alpha,\beta$ -unsaturated sulfonimine.<sup>2</sup>

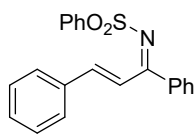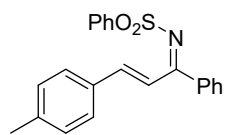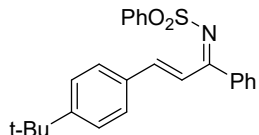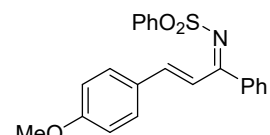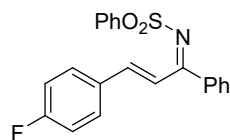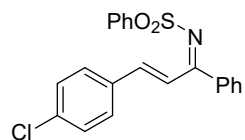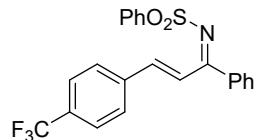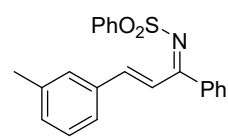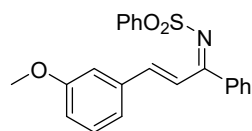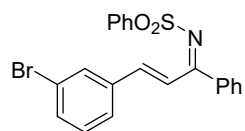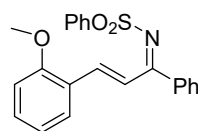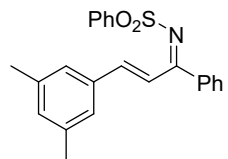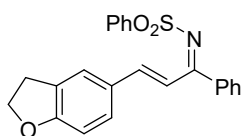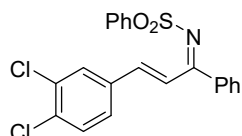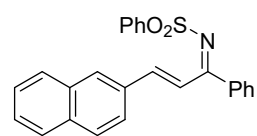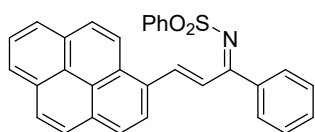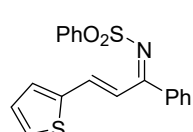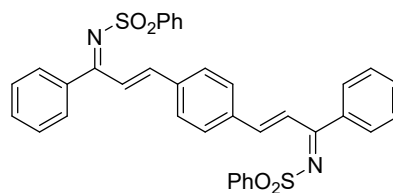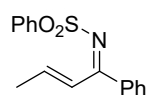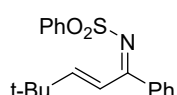

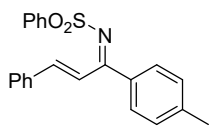

**21s**, 81%

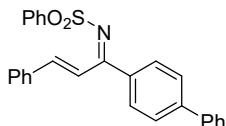

**22s**, 80%

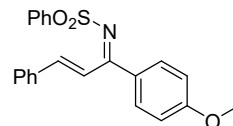

**23s**, 70%

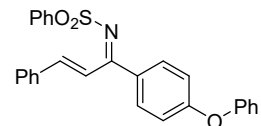

**24s**, 67%

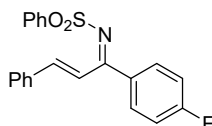

**25s**, 71%

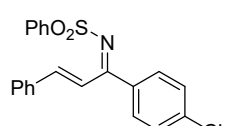

**26s**, 67%

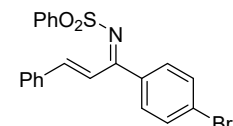

**27s**, 73%

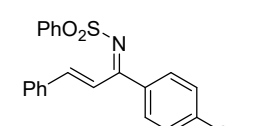

**28s**, 58%

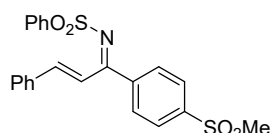

**29s**, 68%

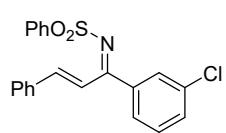

**30s**, 52%

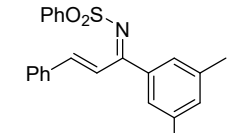

**31s**, 64%

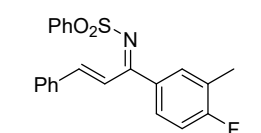

**32s**, 53%

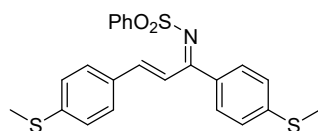

**33s**, 78%

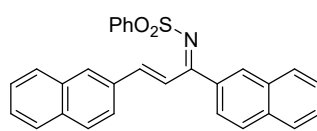

**34s**, 85%

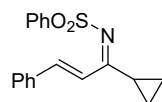

**35s**, 43%

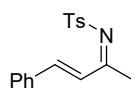

**36s**, 16%

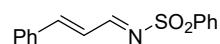

**37s**, 15%

# Characterization data for $\alpha,\beta$ -unsaturated sulfonimines

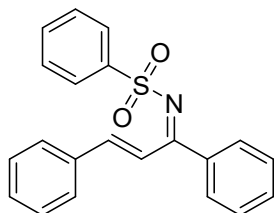

## *N*-((1*E*,2*E*)-1,3-diphenylallylidene)benzenesulfonamide (**1s**)

Following the general procedure A, compound **1s** was obtained as a yellow solid (1.42 g, 82% yield). <sup>1</sup>H NMR (600 MHz, Chloroform-*d*)  $\delta$  8.26 – 7.82 (m, 3H), 7.77 – 7.37 (m, 13H), 7.09 (d, *J* = 15.9 Hz, 1H). <sup>13</sup>C NMR (151 MHz, Chloroform-*d*)  $\delta$  178.0, 149.3, 141.7, 137.3, 134.6, 132.8, 132.2, 131.3, 130.4, 129.2, 129.0, 128.9, 128.5, 127.3, 122.6. The data matches with the reported value<sup>2</sup>.

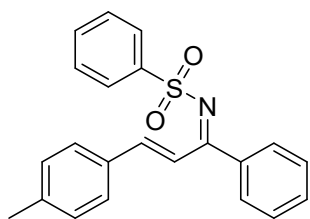

## *N*-((1*E*,2*E*)-1-phenyl-3-(*p*-tolyl)allylidene)benzenesulfonamide (**2s**)

Following the general procedure A, compound **2s** was obtained as a yellow solid (1.39 g, 77% yield). <sup>1</sup>H NMR (600 MHz, Chloroform-*d*)  $\delta$  8.57 – 7.78 (m, 3H), 7.74 – 7.40 (m, 10H), 7.22 (d, *J* = 7.9 Hz, 2H), 7.07 (d, *J* = 15.9 Hz, 1H), 2.39 (s, 3H). <sup>13</sup>C NMR (151 MHz, Chloroform-*d*)  $\delta$  149.6, 142.0, 141.7, 132.6, 131.8, 130.2, 129.8, 128.9, 128.8, 128.4, 127.1, 21.6. The data matches with the reported value<sup>2</sup>.

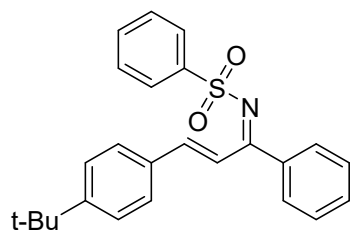

## *N*-((1*E*,2*E*)-3-(4-(*tert*-butyl)phenyl)-1-phenylallylidene)benzenesulfonamide (**3s**)

Following the general procedure A, compound **3s** was obtained as a white solid (1.57 g, 78% yield). <sup>1</sup>H NMR (600 MHz, Chloroform-*d*)  $\delta$  8.24 – 7.89 (m, 3H), 7.77 – 7.60 (m, 2H), 7.59 – 7.47 (m, 6H), 7.47 – 7.40 (m, 4H), 7.07 (d, *J* = 15.6 Hz, 1H), 1.33 (s, 9H). <sup>13</sup>C NMR (151 MHz, Chloroform-*d*)  $\delta$  155.1, 149.4, 141.7, 132.6, 131.8, 130.1, 128.8, 128.8, 128.4, 127.1, 126.1, 121.6, 35.0, 31.1. IR (thin film)  $\nu$  2963, 1615, 1537, 1306, 737 cm<sup>-1</sup>. HRMS (ESI) *m/z* calcd for [C<sub>25</sub>H<sub>25</sub>NO<sub>2</sub>SNa]<sup>+</sup> ([M+Na]<sup>+</sup>): 426.1498, found: 426.1501.

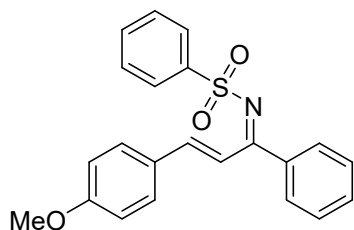

*N*-((1*E*,2*E*)-3-(4-methoxyphenyl)-1-phenylallylidene)benzenesulfonamide (**4s**)

Following the general procedure A, compound **4s** was obtained as a yellow solid (1.56 g, 83% yield). <sup>1</sup>H NMR (600 MHz, Chloroform-*d*) δ 8.16 – 7.76 (m, 3H), 7.75 – 7.58 (m, 2H), 7.58 – 7.46 (m, 6H), 7.43 (t, *J* = 7.7 Hz, 2H), 7.06 (d, *J* = 15.8 Hz, 1H), 6.92 (d, *J* = 8.7 Hz, 2H), 3.85 (s, 3H). <sup>13</sup>C NMR (151 MHz, Chloroform-*d*) δ 178.3, 162.4, 149.7, 141.9, 132.6, 131.7, 130.9, 130.2, 128.9, 128.4, 127.4, 127.2, 122.6, 114.7, 55.6. The data matches with the reported value<sup>2</sup>.

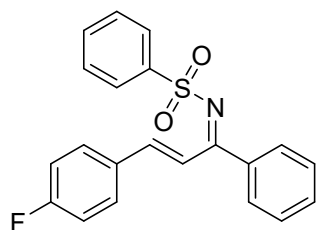

*N*-((1*E*,2*E*)-3-(4-fluorophenyl)-1-phenylallylidene)benzenesulfonamide (**5s**)

Following the general procedure A, compound **5s** was obtained as a white solid (1.17 g, 64% yield). <sup>1</sup>H NMR (600 MHz, Chloroform-*d*) δ 8.22 – 7.80 (m, 3H), 7.79 – 7.61 (m, 2H), 7.61 – 7.47 (m, 6H), 7.43 (t, *J* = 7.7 Hz, 2H), 7.09 (t, *J* = 8.3 Hz, 2H), 7.04 (d, *J* = 15.9 Hz, 1H). <sup>13</sup>C NMR (101 MHz, Chloroform-*d*) δ 177.7, 164.5 (d, *J* = 253.1 Hz), 147.7, 141.5, 136.9, 132.8, 130.8, 130.8 (d, *J* = 8.6 Hz), 130.8, 130.1, 128.9, 128.5, 127.1, 122.4, 116.3 (d, *J* = 22.0 Hz). The data matches with the reported value<sup>2</sup>.

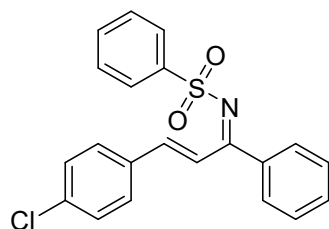

*N*-((1*E*,2*E*)-1-phenyl-3-(4-(trifluoromethyl)phenyl)allylidene)benzenesulfonamide (**6s**)

Following the general procedure A, compound **6s** was obtained as a light-yellow solid (1.52 g, 73% yield). <sup>1</sup>H NMR (600 MHz, ) δ 8.25 – 7.84 (m, 3H), 7.77 – 7.60 (m, 2H), 7.59 – 7.49 (m, 6H), 7.45 (t, *J* = 7.6 Hz, 2H), 7.39 (d, *J* = 7.8 Hz, 2H), 7.03 (d, *J* = 15.4 Hz, 1H). <sup>13</sup>C NMR (101 MHz, Chloroform-*d*) δ 177.6, 147.3, 141.5, 137.2, 136.9, 133.0, 132.8, 132.2, 130.2, 129.9, 129.4, 128.9, 128.5, 127.2, 123.0. The data matches with the reported value<sup>2</sup>.

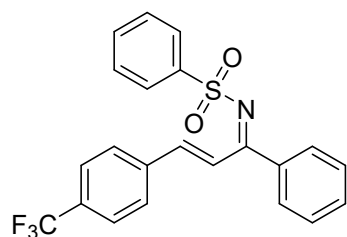

*N*-((1*E*,2*E*)-1-phenyl-3-(4-(trifluoromethyl)phenyl)allylidene)benzenesulfonamide (**7s**)



Following the general procedure A, compound **7s** was obtained as a white solid (1.56 g, 75% yield). <sup>1</sup>H NMR (600 MHz, Chloroform-*d*) δ 8.30 – 7.95 (m, 3H), 7.82 – 7.59 (m, 6H), 7.58 – 7.48 (m, 4H), 7.44 (t, *J* = 7.7 Hz, 2H), 7.07 (d, *J* = 16.1 Hz, 1H). <sup>13</sup>C NMR (151 MHz, Chloroform-*d*) δ 177.2, 146.2, 141.4, 137.9, 136.9, 133.0, 132.5, 132.3, 130.3, 129.0, 128.9, 128.7, 127.3, 126.1, 126.1, 124.9, 124.7, 122.9. IR (thin film) ν 3067, 1618, 1544, 1324, 737 cm<sup>-1</sup>. HRMS (ESI) *m/z* calcd for [C<sub>22</sub>H<sub>16</sub>F<sub>3</sub>NO<sub>2</sub>SNa]<sup>+</sup> ([M+Na]<sup>+</sup>): 438.0746, found: 438.0746.

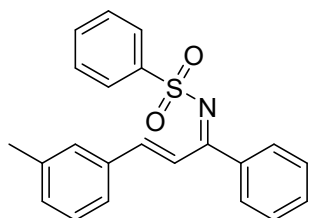

*N*-((1*E*,2*E*)-1-phenyl-3-(*m*-tolyl)allylidene)benzenesulfonamide (**8s**)

Following the general procedure A, compound **8s** was obtained as a yellow solid (1.26 g, 70% yield). <sup>1</sup>H NMR (600 MHz, Chloroform-*d*) δ 8.23 – 7.87 (m, 3H), 7.75 – 7.48 (m, 6H), 7.46 – 7.34 (m, 4H), 7.30 (t, *J* = 7.6 Hz, 1H), 7.24 (d, *J* = 7.4 Hz, 1H), 7.07 (d, *J* = 15.7 Hz, 1H), 2.38 (s, 3H). <sup>13</sup>C NMR (101 MHz, Chloroform-*d*) δ 178.2, 149.6, 141.7, 138.8, 137.2, 134.5, 132.7, 132.2, 132.0, 130.2, 129.3, 129.0, 128.9, 128.4, 127.2, 126.2, 122.4, 21.3. IR (thin film) ν 3061, 1616, 1538, 1307, 732 cm<sup>-1</sup>. HRMS (ESI) *m/z* calcd for [C<sub>22</sub>H<sub>19</sub>NO<sub>2</sub>SNa]<sup>+</sup> ([M+Na]<sup>+</sup>): 384.1029, found: 384.1031.

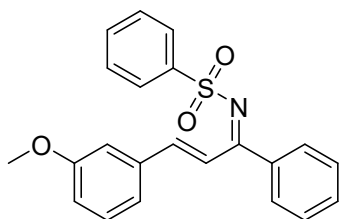

*N*-((1*E*,2*E*)-3-(3-methoxyphenyl)-1-phenylallylidene)benzenesulfonamide (**9s**)

Following the general procedure A, compound **9s** was obtained as a light-yellow solid (1.45 g, 77% yield). <sup>1</sup>H NMR (400 MHz, Chloroform-*d*) δ 8.21 – 7.92 (m, 3H), 7.78 – 7.48 (m, 6H), 7.44 (t, *J* = 7.6 Hz, 2H), 7.32 (t, *J* = 7.9 Hz, 1H), 7.22 – 7.12 (m, 1H), 7.12 – 7.00 (m, 2H), 7.00 – 6.95 (m, 1H), 3.84 (s, 3H). <sup>13</sup>C NMR (101 MHz, Chloroform-*d*) δ 177.9, 160.0, 149.1, 141.6, 137.2, 135.9, 132.7, 132.0, 130.3, 130.1, 128.9, 128.5, 127.2, 122.7, 121.5, 117.3, 113.4, 55.4. The data matches with the reported value<sup>2</sup>.

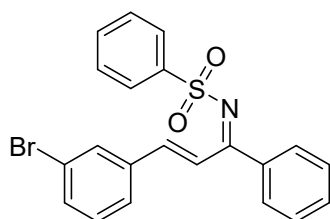

*N*-((1*E*,2*E*)-3-(3-bromophenyl)-1-phenylallylidene)benzenesulfonamide (**10s**)

Following the general procedure A, compound **10s** was obtained as a yellow solid (1.70 g, 80% yield). <sup>1</sup>H NMR (400 MHz, Chloroform-*d*) δ 8.21 – 7.84 (m, 3H), 7.71 – 7.60 (m, 3H), 7.60 – 7.48 (m, 6H), 7.44 (t, *J* = 7.6 Hz, 2H), 7.33 – 7.22 (m, 1H), 6.98 (d, *J* = 16.1 Hz, 1H). <sup>13</sup>C NMR (101 MHz, Chloroform-*d*) δ 177.4, 146.8, 141.4, 136.9, 136.6, 133.8, 132.8, 131.5, 130.6, 130.2, 128.9, 128.5, 127.2, 127.0, 123.8, 123.2. The data matches with the reported value<sup>2</sup>.

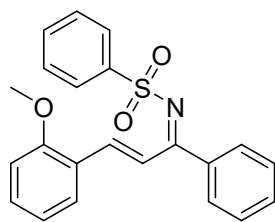

*N*-((1*E*,2*E*)-3-(2-methoxyphenyl)-1-phenylallylidene)benzenesulfonamide (**11s**)

Following the general procedure A, compound **11s** was obtained as a yellow solid (1.37 g, 73% yield). <sup>1</sup>H NMR (400 MHz, Chloroform-*d*) δ 8.38 – 7.91 (m, 3H), 7.77 – 7.59 (m, 3H), 7.59 – 7.34 (m, 8H), 7.00 (t, *J* = 7.5 Hz, 1H), 6.90 (d, *J* = 8.4 Hz, 1H), 3.82 (s, 3H). <sup>13</sup>C NMR (151 MHz, Chloroform-*d*) δ 178.8, 158.7, 145.1, 141.9, 137.4, 132.7, 132.7, 132.0, 130.5, 129.4, 128.9, 128.4, 127.2, 123.7, 122.9, 121.1, 111.3, 55.7. IR (thin film) ν 3067, 1607, 1527, 1305, 735 cm<sup>-1</sup>. HRMS (ESI) *m/z* calcd for [C<sub>22</sub>H<sub>19</sub>NO<sub>3</sub>SNa]<sup>+</sup> ([M+Na]<sup>+</sup>): 400.0978, found: 400.0980.

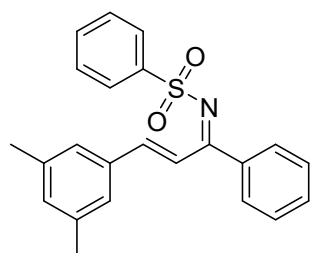

*N*-((1*E*,2*E*)-3-(3,5-dimethylphenyl)-1-phenylallylidene)benzenesulfonamide (**12s**)

Following the general procedure A, compound **12s** was obtained as a yellow solid (1.44 g, 77% yield). <sup>1</sup>H NMR (400 MHz, Chloroform-*d*) δ 8.14 – 7.92 (m, 3H), 7.70 – 7.58 (m, 2H), 7.58 – 7.46 (m, 4H), 7.42 (t, *J* = 7.6 Hz, 2H), 7.19 (s, 2H), 7.04 (d, *J* = 16.0 Hz, 2H), 2.33 (s, 6H). <sup>13</sup>C NMR (101 MHz, Chloroform-*d*) δ 178.2, 150.0, 141.7, 138.6, 137.2, 134.4, 133.1, 132.6, 131.9, 130.1, 128.8, 128.3, 127.1, 126.7, 122.0, 21.1. IR (thin film) ν 2919, 1618, 1528, 1305, 1152 cm<sup>-1</sup>. HRMS (ESI) *m/z* calcd for [C<sub>23</sub>H<sub>21</sub>NO<sub>2</sub>SNa]<sup>+</sup> ([M+Na]<sup>+</sup>): 398.1185, found: 398.1185.

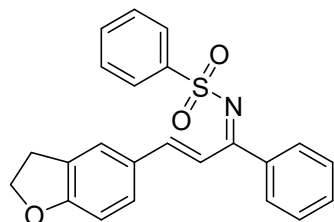

*N*-((1*E*,2*E*)-3-(2,3-dihydrobenzofuran-5-yl)-1-phenylallylidene)benzenesulfonamide (**13s**)

Following the general procedure A, compound **13s** was obtained as a yellow solid (1.59 g, 82% yield). <sup>1</sup>H NMR (600 MHz, Chloroform-*d*) δ 8.18 – 7.71 (m, 3H), 7.72 – 7.57 (m, 2H), 7.57 – 7.46 (m, 5H), 7.42 (t, *J* = 7.7 Hz, 2H), 7.32 – 7.22 (m, 1H), 7.06 (d, *J* = 15.7 Hz, 1H), 6.77 (d, *J* = 8.3 Hz, 1H), 4.63 (t, *J* = 8.7 Hz, 2H), 3.22 (t, *J* = 8.6 Hz, 2H). <sup>13</sup>C NMR (101 MHz, Chloroform-*d*) δ 178.3, 163.4, 150.3, 141.9, 137.4, 132.5, 131.6, 131.4, 130.0, 128.8, 128.6, 128.3, 127.4, 127.0, 125.0, 119.6, 109.8, 72.1, 29.1. The data matches with the reported value<sup>2</sup>.

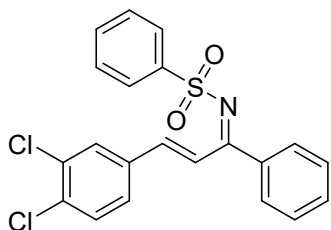

*N*-((1*E*,2*E*)-3-(3,4-dichlorophenyl)-1-phenylallylidene)benzenesulfonamide (**14s**)

Following the general procedure A, compound **14s** was obtained as a white solid (1.45 g, 70% yield). <sup>1</sup>H NMR (400 MHz, Chloroform-*d*) δ 8.22 – 7.87 (m, 3H), 7.75 – 7.59 (m, 3H), 7.58 – 7.49 (m, 4H), 7.48 – 7.36 (m, 4H), 6.95 (d, *J* = 16.1 Hz, 1H). <sup>13</sup>C NMR (101 MHz, Chloroform-*d*) δ 177.1, 145.5, 141.3, 136.7, 135.0, 134.5, 133.4, 132.9, 132.4, 131.1, 130.3, 130.2, 129.0, 128.6, 127.4, 127.2, 124.2. IR (thin film) ν 3067, 1624, 1556, 1306, 1154 cm<sup>-1</sup>. HRMS (ESI) *m/z* calcd for [C<sub>21</sub>H<sub>15</sub>Cl<sub>2</sub>NO<sub>2</sub>SNa]<sup>+</sup> ([M+Na]<sup>+</sup>): 438.0093, found: 438.0091.

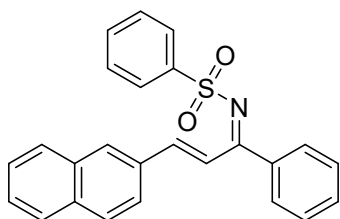

*N*-((1*E*,2*E*)-3-(naphthalen-2-yl)-1-phenylallylidene)benzenesulfonamide (**15s**)

Following the general procedure A, compound **15s** was obtained as a yellow solid (1.83 g, 92% yield). <sup>1</sup>H NMR (600 MHz, Chloroform-*d*) δ 8.34 – 7.99 (m, 3H), 7.94 – 7.78 (m, 5H), 7.76 – 7.62 (m, 2H), 7.60 – 7.50 (m, 6H), 7.47 (t, *J* = 7.7 Hz, 2H), 7.26 (d, *J* = 15.0 Hz, 1H). <sup>13</sup>C NMR (101 MHz, Chloroform-*d*) δ 149.5, 141.6, 134.7, 133.2, 132.7, 132.1, 132.0, 131.2, 130.2, 129.0, 128.9, 128.8, 128.5, 127.9, 127.8, 127.2, 126.9, 123.9, 122.7. The data matches with the reported value<sup>2</sup>.

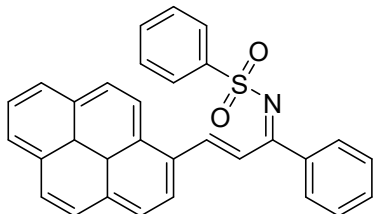

*N*-((1*E*,2*E*)-1-phenyl-3-(pyren-1-yl)allylidene)benzenesulfonamide (**16s**)

Following the general procedure A, compound **16s** was obtained as a red solid (1.67 g, 71% yield). <sup>1</sup>H NMR (400 MHz, Chloroform-*d*) δ 8.49 (d, *J* = 7.9 Hz, 1H), 8.44 – 8.16 (m, 5H), 8.15 – 7.98 (m, 7H), 7.82 (d, *J* = 6.6 Hz, 2H), 7.67 – 7.47 (m, 6H). <sup>13</sup>C NMR (101 MHz, Chloroform-*d*) δ 145.8, 141.7, 137.5, 133.4, 132.7, 132.1, 131.3, 130.5, 130.2, 129.1, 129.0, 128.9, 128.6, 128.2, 127.4, 127.2, 126.4, 126.4, 126.1, 125.4, 124.9, 124.8, 124.5, 122.1, 121.9. IR (thin film) ν 1634, 1528, 1306, 1152, 818 cm<sup>-1</sup>. HRMS (ESI) *m/z* calcd for [C<sub>31</sub>H<sub>21</sub>NO<sub>2</sub>SNa]<sup>+</sup> ([M+Na]<sup>+</sup>): 494.1185, found: 494.1189.

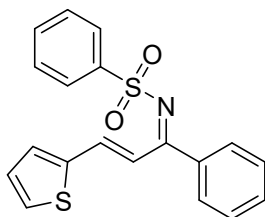

*N*-((1*E*,2*E*)-1-phenyl-3-(thiophen-2-yl)allylidene)benzenesulfonamide (**17s**)

Following the general procedure A, compound **17s** was obtained as a yellow solid (989 mg, 56% yield). <sup>1</sup>H NMR (400 MHz, Chloroform-*d*) δ 8.03 (d, *J* = 6.1 Hz, 2H), 7.95 – 7.58 (m, 3H), 7.58 – 7.35 (m, 7H), 7.26 (s, 1H), 7.19 (d, *J* = 15.6 Hz, 1H), 7.13 – 7.03 (m, 1H). <sup>13</sup>C NMR (101 MHz, Chloroform-*d*) δ 177.6, 141.8, 141.6, 140.0, 132.7, 132.4, 131.8, 131.0, 129.9, 128.9, 128.6, 128.4, 127.2, 121.5. The data matches with the reported value<sup>2</sup>.

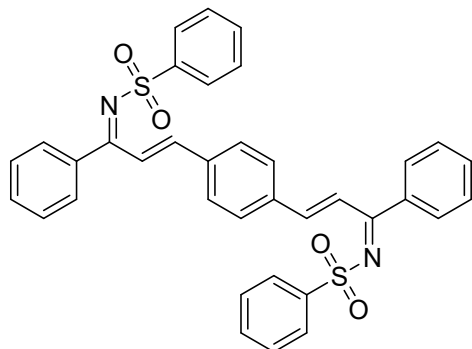

*N,N'*-((1*E*,1'*E*,2*E*,2'*E*)-1,4-phenylenebis(1-phenylprop-2-en-3-yl-1-ylidene))dibzenesulfonamide (**18s**)

Following the general procedure A, compound **18s** was obtained as a yellow solid (862 mg, 28% yield). <sup>1</sup>H NMR (600 MHz, Chloroform-*d*) δ 8.52 – 7.87 (m, 6H), 7.83 – 7.31 (m, 20H), 7.17 – 6.98 (m, 2H). <sup>13</sup>C NMR (101 MHz, Chloroform-*d*) δ 177.5, 147.3, 141.4, 136.9, 132.8, 132.3, 130.2, 129.3, 128.9, 128.5, 127.2, 123.8. IR (thin film) ν 1616, 1535, 1306, 1153, 725 cm<sup>-1</sup>. HRMS (ESI) *m/z* calcd for [C<sub>36</sub>H<sub>28</sub>N<sub>2</sub>O<sub>4</sub>S<sub>2</sub>Na]<sup>+</sup> ([M+Na]<sup>+</sup>): 639.1383, found: 639.1387.

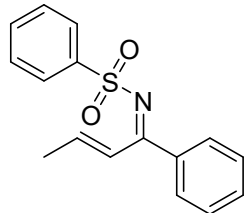

*N*-((1*E*,2*E*)-1-phenylbut-2-en-1-ylidene)benzenesulfonamide (**19s**)

Following the general procedure A, compound **19s** was obtained as a yellow oil (285 mg, 10% yield). <sup>1</sup>H NMR (400 MHz, Chloroform-*d*) δ 8.12 – 7.92 (m, 2H), 7.63 – 7.44 (m, 7H), 7.37 (t, *J* = 7.6 Hz, 2H), 6.52 – 6.34 (m, 1H), 2.03 (d, *J* = 6.0 Hz, 3H). <sup>13</sup>C NMR (101 MHz, Chloroform-*d*) δ 178.2, 150.6, 141.7, 137.4, 132.8, 132.1, 130.3, 128.9, 128.4, 127.2, 125.1, 19.7. IR (thin film) ν 3064, 1592, 1568 1448, 1310 cm<sup>-1</sup>. HRMS (ESI) *m/z* calcd for [C<sub>16</sub>H<sub>15</sub>NO<sub>2</sub>SNa]<sup>+</sup> ([M+Na]<sup>+</sup>): 308.0716, found: 308.0716.

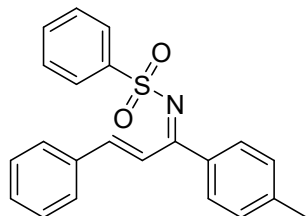

*N*-((1*E*,2*E*)-3-phenyl-1-(*p*-tolyl)allylidene)benzenesulfonamide (**21s**)

Following the general procedure A, compound **21s** was obtained as a yellow solid (1.46 g, 81% yield). <sup>1</sup>H NMR (400 MHz, Chloroform-*d*) δ 8.13 – 7.93 (m, 3H), 7.67 – 7.42 (m, 7H), 7.42 – 7.34 (m, 3H), 7.22 (d, *J* = 8.0 Hz, 2H), 7.07 (d, *J* = 16.1 Hz, 1H), 2.39 (s, 3H). <sup>13</sup>C NMR (101 MHz, Chloroform-*d*)

$\delta$  178.0, 148.6, 143.1, 141.8, 134.6, 134.3, 132.7, 131.1, 130.4, 129.2, 129.1, 128.9, 128.8, 127.1, 122.9, 21.7. IR (thin film)  $\nu$  3062, 2921, 1661, 1576, 1316  $\text{cm}^{-1}$ . HRMS (ESI)  $m/z$  calcd for  $[\text{C}_{22}\text{H}_{19}\text{NO}_2\text{SNa}]^+$  ( $[\text{M}+\text{Na}]^+$ ): 384.1029, found: 384.1030.

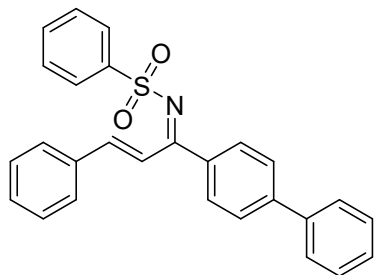

*N*-((1*E*,2*E*)-1-([1,1'-biphenyl]-4-yl)-3-phenylallylidene)benzenesulfonamide (**22s**)

Following the general procedure A, compound **22s** was obtained as a yellow solid (1.69 g, 80% yield).  $^1\text{H}$  NMR (400 MHz, Chloroform-*d*)  $\delta$  8.35 – 7.89 (m, 3H), 7.75 – 7.70 (m, 2H), 7.70 – 7.37 (m, 15H), 7.16 (d,  $J = 16.1$  Hz, 1H).  $^{13}\text{C}$  NMR (101 MHz, Chloroform-*d*)  $\delta$  177.6, 148.9, 145.1, 141.7, 139.8, 135.9, 134.6, 132.8, 131.3, 130.9, 129.2, 129.1, 128.9, 128.9, 128.3, 127.3, 127.2, 127.1, 122.6. IR (thin film)  $\nu$  3060, 1611, 1526, 1317, 1152  $\text{cm}^{-1}$ . HRMS (ESI)  $m/z$  calcd for  $[\text{C}_{27}\text{H}_{21}\text{NO}_2\text{SNa}]^+$  ( $[\text{M}+\text{Na}]^+$ ): 446.1185, found: 446.1185.

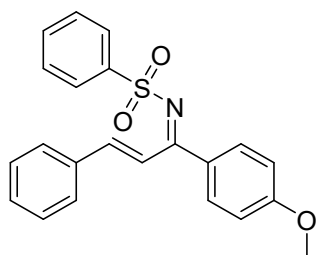

*N*-((1*E*,2*E*)-1-(4-methoxyphenyl)-3-phenylallylidene)benzenesulfonamide (**23s**)

Following the general procedure A, compound **23s** was obtained as a yellow solid (1.32 g, 70% yield).  $^1\text{H}$  NMR (400 MHz, Chloroform-*d*)  $\delta$  8.10 – 7.88 (m, 3H), 7.71 (d,  $J = 8.7$  Hz, 2H), 7.61 – 7.48 (m, 5H), 7.44 – 7.39 (m, 3H), 7.07 (d,  $J = 16.1$  Hz, 1H), 6.94 (d,  $J = 8.8$  Hz, 2H), 3.87 (s, 3H).  $^{13}\text{C}$  NMR (101 MHz, Chloroform-*d*)  $\delta$  177.1, 163.4, 147.7, 141.9, 134.7, 132.6, 130.9, 129.1, 128.8, 128.6, 127.1, 113.9, 55.6. IR (thin film)  $\nu$  3061, 1603, 1578, 11521, 1306  $\text{cm}^{-1}$ . HRMS (ESI)  $m/z$  calcd for  $[\text{C}_{22}\text{H}_{19}\text{NO}_3\text{SNa}]^+$  ( $[\text{M}+\text{Na}]^+$ ): 400.0978, found: 400.0978.

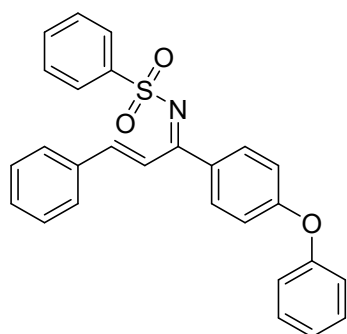

*N*-((1*E*,2*E*)-1-(4-phenoxyphenyl)-3-phenylallylidene)benzenesulfonamide (**24s**)

Following the general procedure A, compound **24s** was obtained as a light-yellow solid (1.47 g, 67% yield).  $^1\text{H}$  NMR (400 MHz, Chloroform-*d*)  $\delta$  8.09 – 7.86 (m, 3H), 7.68 (d,  $J = 8.5$  Hz, 2H), 7.63 – 7.46 (m, 5H), 7.46 – 7.31 (m, 5H), 7.19 (t,  $J = 7.4$  Hz, 1H), 7.15 – 7.04 (m, 3H), 6.99 (d,  $J = 8.7$  Hz, 2H).  $^{13}\text{C}$

NMR (101 MHz, Chloroform-*d*)  $\delta$  176.9, 161.7, 155.4, 148.1, 141.7, 134.5, 132.6, 132.4, 131.0, 130.1, 129.0, 128.8, 128.7, 127.1, 124.7, 120.2, 117.3. IR (thin film)  $\nu$  3062, 1614, 1585, 1529, 1317  $\text{cm}^{-1}$ . HRMS (ESI)  $m/z$  calcd for  $[\text{C}_{27}\text{H}_{21}\text{NO}_3\text{SNa}]^+$  ( $[\text{M}+\text{Na}]^+$ ): 462.1134, found: 462.1135.

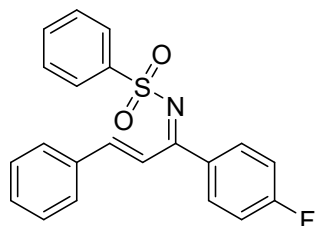

*N*-((1*E*,2*E*)-1-(4-fluorophenyl)-3-phenylallylidene)benzenesulfonamide (**25s**)

Following the general procedure A, compound **25s** was obtained as a white solid (1.30 g, 71% yield).  $^1\text{H}$  NMR (400 MHz, Chloroform-*d*)  $\delta$  8.04 (d,  $J = 7.1$  Hz, 3H), 7.79 – 7.62 (m, 2H), 7.62 – 7.47 (m, 5H), 7.47 – 7.34 (m, 3H), 7.18 – 6.99 (m, 3H).  $^{13}\text{C}$  NMR (151 MHz, Chloroform-*d*)  $\delta$  176.5, 166.1, 164.5, 148.8, 141.4, 134.3, 132.8, 132.7, 131.3, 129.1, 129.0, 128.9, 128.8, 127.1, 122.4, 115.7, 115.6. IR (thin film)  $\nu$  3065, 1614, 1575, 1537, 1316  $\text{cm}^{-1}$ . HRMS (ESI)  $m/z$  calcd for  $[\text{C}_{21}\text{H}_{16}\text{FNO}_2\text{SNa}]^+$  ( $[\text{M}+\text{Na}]^+$ ): 388.0778, found: 388.0782.

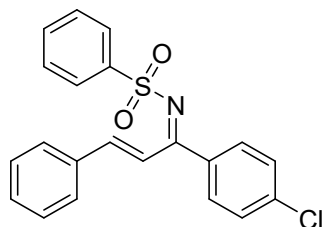

*N*-((1*E*,2*E*)-1-(4-chlorophenyl)-3-phenylallylidene)benzenesulfonamide (**26s**)

Following the general procedure A, compound **26s** was obtained as a white solid (1.28 g, 67% yield).  $^1\text{H}$  NMR (400 MHz, Chloroform-*d*)  $\delta$  8.14 – 7.94 (m, 3H), 7.72 – 7.47 (m, 7H), 7.46 – 7.35 (m, 5H), 7.05 (d,  $J = 16.1$  Hz, 1H).  $^{13}\text{C}$  NMR (101 MHz, Chloroform-*d*)  $\delta$  176.6, 149.1, 141.4, 138.6, 135.5, 134.3, 131.6, 131.4, 129.2, 129.0, 128.9, 128.8, 127.2, 126.4, 122.2. The data matches with the reported value<sup>2</sup>.

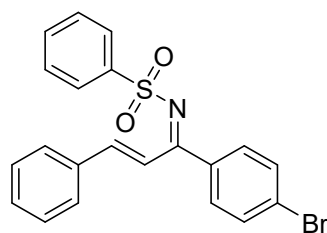

*N*-((1*E*,2*E*)-1-(4-bromophenyl)-3-phenylallylidene)benzenesulfonamide (**27s**)

Following the general procedure A, compound **27s** was obtained as a white solid (1.55 g, 73% yield).  $^1\text{H}$  NMR (400 MHz, Chloroform-*d*)  $\delta$  8.21 – 7.97 (m, 3H), 7.75 – 7.47 (m, 9H), 7.42 – 7.37 (m, 3H), 7.06 (d,  $J = 16.1$  Hz, 1H).  $^{13}\text{C}$  NMR (101 MHz, Chloroform-*d*)  $\delta$  176.7, 149.2, 141.4, 136.0, 134.3, 132.9, 131.8, 131.4, 129.2, 128.9, 128.9, 127.2, 122.2. IR (thin film)  $\nu$  3061, 1606, 1585, 1535, 1307  $\text{cm}^{-1}$ . HRMS (ESI)  $m/z$  calcd for  $[\text{C}_{21}\text{H}_{16}\text{BrNO}_2\text{SNa}]^+$  ( $[\text{M}+\text{Na}]^+$ ): 447.9977, found: 447.9977.

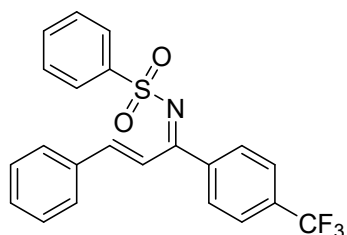

*N*-((1*E*,2*E*)-3-phenyl-1-(4-(trifluoromethyl)phenyl)allylidene)benzenesulfonamide (**28s**)

Following the general procedure A, compound **28s** was obtained as a yellow solid (1.20 g, 58% yield). <sup>1</sup>H NMR (400 MHz, Chloroform-*d*) δ 8.29 – 7.89 (m, 3H), 7.90 – 7.64 (m, 4H), 7.64 – 7.49 (m, 5H), 7.48 – 7.36 (m, 3H), 7.05 (d, *J* = 14.8 Hz, 1H). <sup>13</sup>C NMR (151 MHz, Chloroform-*d*) δ 176.5, 150.0, 141.2, 140.7, 134.3, 133.1, 131.7, 130.5, 129.3, 129.1, 127.3, 125.5, 123.8 (q, *J* = 272.7 Hz), 122.8, 122.1, 121.0. IR (thin film) ν 3067, 1618, 1581, 1514, 1324 cm<sup>-1</sup>. HRMS (ESI) *m/z* calcd for [C<sub>22</sub>H<sub>16</sub>F<sub>3</sub>NO<sub>2</sub>SNa]<sup>+</sup> ([M+Na]<sup>+</sup>): 438.0746, found: 438.0747.

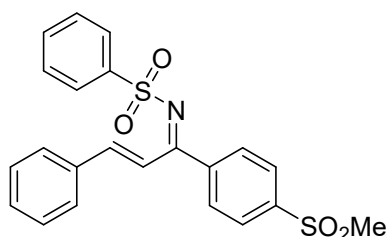

*N*-((1*E*,2*E*)-1-(4-(methylsulfonyl)phenyl)-3-phenylallylidene)benzenesulfonamide (**29s**)

Following the general procedure A, compound **29s** was obtained as a light-yellow solid (1.45 g, 68% yield). <sup>1</sup>H NMR (400 MHz, Chloroform-*d*) δ 8.40 – 7.91 (m, 5H), 7.87 – 7.71 (m, 2H), 7.63 – 7.49 (m, 5H), 7.47 – 7.39 (m, 3H), 7.05 (d, *J* = 14.6 Hz, 1H), 3.09 (s, 3H). <sup>13</sup>C NMR (101 MHz, Chloroform-*d*) δ 175.9, 150.3, 143.1, 142.2, 141.0, 134.0, 133.1, 131.8, 130.9, 129.2, 129.1, 127.5, 127.2, 121.8, 44.4. IR (thin film) ν 3026, 1659, 1601, 1574, 1541 cm<sup>-1</sup>. HRMS (ESI) *m/z* calcd for [C<sub>22</sub>H<sub>19</sub>NO<sub>4</sub>S<sub>2</sub>Na]<sup>+</sup> ([M+Na]<sup>+</sup>): 448.0648, found: 448.0646.

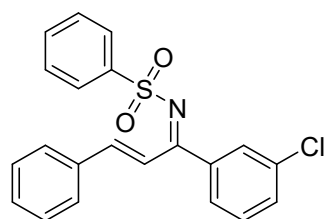

*N*-((1*E*,2*E*)-1-(3-chlorophenyl)-3-phenylallylidene)benzenesulfonamide (**30s**)

Following the general procedure A, compound **30s** was obtained as a light-yellow solid (991 mg, 52% yield). <sup>1</sup>H NMR (400 MHz, Chloroform-*d*) δ 8.28 – 7.86 (m, 3H), 7.85 – 7.47 (m, 8H), 7.46 – 7.35 (m, 4H), 7.07 (d, *J* = 15.9 Hz, 1H). <sup>13</sup>C NMR (101 MHz, Chloroform-*d*) δ 176.3, 149.5, 141.3, 138.8, 134.6, 134.3, 132.9, 131.9, 131.5, 129.7, 129.2, 129.0, 128.9, 128.3, 127.2, 122.2. IR (thin film) ν 3065, 1613, 1576 1540, 1316 cm<sup>-1</sup>. HRMS (ESI) *m/z* calcd for [C<sub>21</sub>H<sub>16</sub>ClNO<sub>2</sub>SNa]<sup>+</sup> ([M+Na]<sup>+</sup>): 404.0482, found: 404.0481.

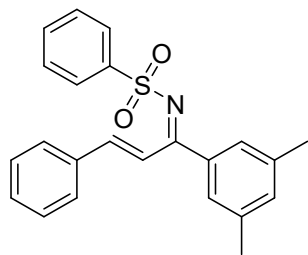

*N*-((1*E*,2*E*)-1-(3,5-dimethylphenyl)-3-phenylallylidene)benzenesulfonamide (**31s**)

Following the general procedure A, compound **31s** was obtained as a white solid (1.20 g, 64% yield). <sup>1</sup>H NMR (600 MHz, Chloroform-*d*) δ 8.25 – 7.81 (m, 3H), 7.65 – 7.48 (m, 5H), 7.45 – 7.39 (m, 3H), 7.32 – 7.12 (m, 3H), 7.07 (d, *J* = 16.0 Hz, 1H), 2.34 (s, 6H). <sup>13</sup>C NMR (101 MHz, Chloroform-*d*) δ 178.6, 149.0, 141.7, 138.1, 137.2, 134.6, 133.8, 132.7, 131.1, 129.1, 128.9, 128.8, 127.9, 127.2, 122.7, 21.3. IR (thin film) ν 2919, 1618, 1528, 1445, 1306 cm<sup>-1</sup>. HRMS (ESI) *m/z* calcd for [C<sub>23</sub>H<sub>21</sub>NO<sub>2</sub>SNa]<sup>+</sup> ([M+Na]<sup>+</sup>): 398.1185, found: 398.1187.

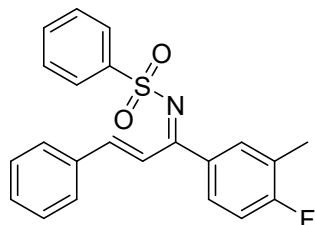

*N*-((1*E*,2*E*)-1-(4-fluoro-3-methylphenyl)-3-phenylallylidene)benzenesulfonamide (**32s**)

Following the general procedure A, compound **32s** was obtained as a yellow solid (1.01 g, 53% yield). <sup>1</sup>H NMR (400 MHz, Chloroform-*d*) δ 8.14 – 7.93 (m, 3H), 7.66 – 7.45 (m, 7H), 7.44 – 7.37 (m, 3H), 7.12 – 7.00 (m, 2H), 2.30 (s, 3H). <sup>13</sup>C NMR (101 MHz, Chloroform-*d*) δ 177.0, 163.9 (d, *J* = 253.5 Hz), 148.8, 141.5, 134.5, 133.6, 132.8, 131.3, 130.0, 129.1, 128.9, 128.8, 127.2, 125.5 (d, *J* = 17.9 Hz), 122.7, 115.2 (d, *J* = 23.0 Hz), 14.6. IR (thin film) ν 3063, 1614, 1538, 1448, 1318 cm<sup>-1</sup>. HRMS (ESI) *m/z* calcd for [C<sub>22</sub>H<sub>18</sub>FNO<sub>2</sub>SNa]<sup>+</sup> ([M+Na]<sup>+</sup>): 402.0934, found: 402.0935.

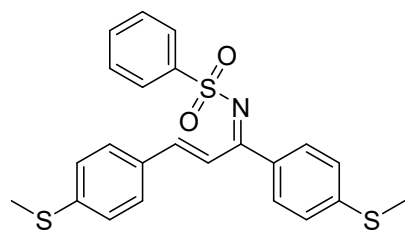

*N*-((1*E*,2*E*)-1,3-bis(4-(methylthio)phenyl)allylidene)benzenesulfonamide (**33s**)

Following the general procedure A, compound **33s** was obtained as a yellow solid (78% yield). <sup>1</sup>H NMR (400 MHz, Chloroform-*d*) δ 8.13 – 7.76 (m, 3H), 7.63 – 7.41 (m, 7H), 7.27 – 7.19 (m, 4H), 7.03 (d, *J* = 16.0 Hz, 1H), 2.49 (s, 6H). <sup>13</sup>C NMR (101 MHz, Chloroform-*d*) δ 177.2, 148.1, 145.0, 143.6, 141.8, 133.2, 132.6, 130.9, 130.7, 129.1, 128.9, 127.1, 125.8, 125.1, 121.8, 15.0, 14.9. IR (thin film) ν 3061, 2920, 1654, 1589, 1316 cm<sup>-1</sup>. HRMS (ESI) *m/z* calcd for [C<sub>23</sub>H<sub>21</sub>NO<sub>2</sub>S<sub>3</sub>Na]<sup>+</sup> ([M+Na]<sup>+</sup>): 462.0627, found: 462.0627.



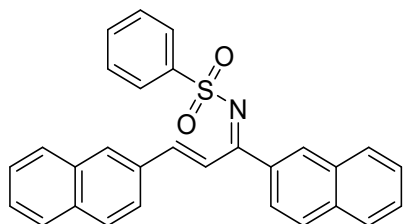

**N-((1E,2E)-1,3-di(naphthalen-2-yl)allylidene)benzenesulfonamide (34s)**

Following the general procedure A, compound **34s** was obtained as a yellow solid (85% yield). <sup>1</sup>H NMR (400 MHz, Chloroform-*d*) δ 8.57 – 8.16 (m, 2H), 8.14 – 8.05 (m, 2H), 7.93 – 7.75 (m, 9H), 7.54 (dp, *J* = 23.9, 7.4 Hz, 7H), 7.29 (d, *J* = 15.9 Hz, 1H). <sup>13</sup>C NMR (101 MHz, Chloroform-*d*) δ 178.0, 149.3, 144.9, 141.6, 134.9, 134.6, 133.2, 132.7, 132.4, 132.1, 131.1, 129.2, 129.0, 128.9, 128.7, 128.3, 128.2, 127.9, 127.8, 127.2, 126.9, 126.9, 123.8, 122.9. IR (thin film) ν 2991, 1628, 1539, 1304, 1152 cm<sup>-1</sup>. HRMS (ESI) *m/z* calcd for [C<sub>29</sub>H<sub>21</sub>NO<sub>2</sub>SNa]<sup>+</sup> ([M+Na]<sup>+</sup>): 471.1185, found: 471.1185.

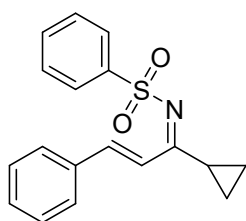

**N-((1Z,2E)-1-cyclopropyl-3-phenylallylidene)benzenesulfonamide(35s)**

Following the general procedure A, compound **35s** was obtained as a white solid (666 mg, 43% yield). <sup>1</sup>H NMR (400 MHz, Chloroform-*d*) δ 7.96 (d, *J* = 7.4 Hz, 3H), 7.74 – 7.47 (m, 6H), 7.47 – 7.36 (m, 3H), 2.58 – 2.15 (m, 1H), 1.24 – 1.03 (m, 4H). <sup>13</sup>C NMR (101 MHz, Chloroform-*d*) δ 183.2, 144.5, 142.0, 134.6, 132.4, 131.0, 129.0, 128.7, 126.7, 123.4, 29.7, 16.4, 13.2. IR (thin film) ν 3056, 1617, 1578, 1530, 1286 cm<sup>-1</sup>. HRMS (ESI) *m/z* calcd for [C<sub>18</sub>H<sub>17</sub>NO<sub>2</sub>SNa]<sup>+</sup> ([M+Na]<sup>+</sup>): 334.0782, found: 334.0782.

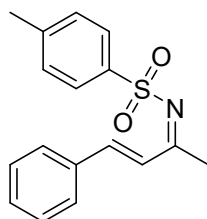

**4-methyl-N-((2Z,3E)-4-phenylbut-3-en-2-ylidene)benzenesulfonamide (36s)**

Following the general procedure A, compound **36s** was obtained as a yellow oil (234 mg, 16% yield). <sup>1</sup>H NMR (400 MHz, Chloroform-*d*) δ 7.90 (d, *J* = 8.2 Hz, 2H), 7.53 – 7.50 (m, 2H), 7.43 – 7.37 (m, 4H), 7.33 (d, *J* = 8.0 Hz, 2H), 6.77 (d, *J* = 16.3 Hz, 1H), 2.77 (s, 3H), 2.43 (s, 3H). <sup>13</sup>C NMR (101 MHz, Chloroform-*d*) δ 179.3, 144.1, 143.6, 138.5, 134.4, 130.8, 129.5, 129.0, 128.3, 127.1, 122.6, 21.6, 20.0. IR (thin film) ν 1638, 1478, 1318, 1205, 1146 cm<sup>-1</sup>. HRMS (ESI) *m/z* calcd for [C<sub>17</sub>H<sub>17</sub>NO<sub>2</sub>SNa]<sup>+</sup> ([M+Na]<sup>+</sup>): 322.0872, found: 322.0872.

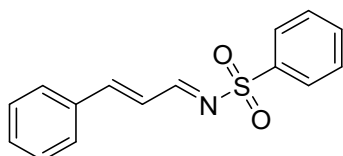

**N-((1E,2E)-3-phenylallylidene)benzenesulfonamide (37s)**

Following the general procedure A, compound **37s** was obtained as a white solid (196 mg, 15% yield).

$^1\text{H}$  NMR (400 MHz, Chloroform-*d*)  $\delta$  8.81 (d,  $J = 9.5$  Hz, 1H), 7.99 (d,  $J = 8.0$  Hz, 2H), 7.69 – 7.52 (m, 6H), 7.51 – 7.41 (m, 3H), 7.00 (dd,  $J = 15.8, 9.5$  Hz, 1H).  $^{13}\text{C}$  NMR (101 MHz, Chloroform-*d*)  $\delta$  171.5, 154.3, 138.5, 134.2, 133.6, 131.9, 129.3 (d,  $J = 3.8$  Hz), 128.8, 128.0, 124.8. IR (thin film)  $\nu$  3054, 1617, 1579, 1448, 1318  $\text{cm}^{-1}$ . HRMS (ESI)  $m/z$  calcd for  $[\text{C}_{15}\text{H}_{13}\text{NO}_2\text{SNa}]^+$  ( $[\text{M}+\text{Na}]^+$ ): 294.0559, found: 294.0559.

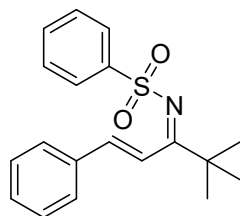

*N*-((1*E*,2*E*)-4,4-dimethyl-1-phenylpent-1-en-3-ylidene)benzenesulfonamide (**38s**)

Following the general procedure A, compound **38s** was obtained as a white solid (916 mg, 56% yield).  $^1\text{H}$  NMR (400 MHz, Chloroform-*d*)  $\delta$  7.98 (d,  $J = 7.5$  Hz, 2H), 7.59 – 7.35 (m, 9H), 7.09 (d,  $J = 16.5$  Hz, 1H), 1.26 (s, 9H).  $^{13}\text{C}$  NMR (101 MHz, Chloroform-*d*)  $\delta$  190.1, 142.1, 135.1, 132.3, 130.0, 128.9, 128.7, 127.9, 126.9, 121.3, 42.8, 28.4. IR (thin film)  $\nu$  2974, 1630, 1577, 1447, 1305  $\text{cm}^{-1}$ . HRMS (ESI)  $m/z$  calcd for  $[\text{C}_{19}\text{H}_{21}\text{NO}_2\text{SNa}]^+$  ( $[\text{M}+\text{Na}]^+$ ): 350.1185, found: 350.1189.

# General procedure B for the synthesis of pyrroles

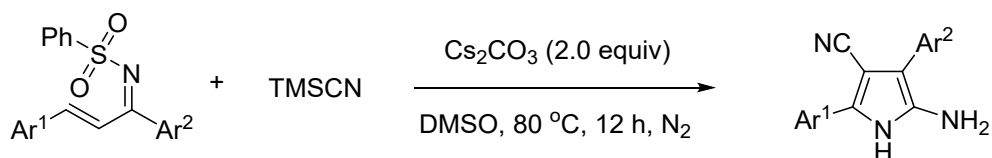

General procedure B: To a 25 mL of Schlenk tube with a stir bar was added the  $\alpha,\beta$ -unsaturated sulfonimine (0.5 mmol),  $\text{Cs}_2\text{CO}_3$  (1 mmol, 326 mg) and DMSO (4 mL) under a nitrogen atmosphere. Upon dissolution the imine, TMSCN (138  $\mu\text{L}$ , 2.2 equiv) was added, and the mixture was stirred for 10 s - 1 min until the solution turned red. Then, the mixture was heated to 80  $^\circ\text{C}$  in an oil bath for 12 h. After cooling to rt, the solution was pooled into 20 mL of ice water until no solid precipitate. The desired pyrrole can be obtained through filtration without further purification.

## General procedure C for the synthesis of pyrrolo[1,2-*a*]pyrimidine

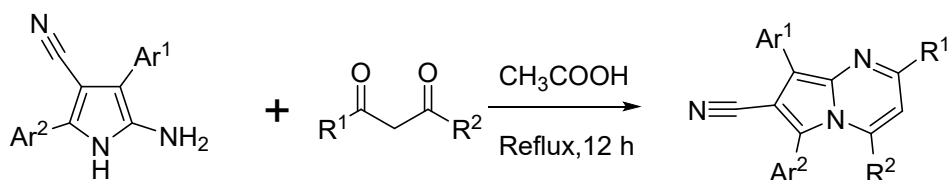

General procedure C: A mixture of NH-pyrrole (1 mmol) and 1,3-diketone (1.5-10 mmol) was refluxed in acetic acid (5 mL) overnight. After the reaction solution was cooled to room temperature, 10 mL of DCM was added. The organic layer was washed with water (3×20 mL) and saturated sodium carbonate solution (10 mL), dried over MgSO<sub>4</sub>, and concentrated. The crude product was purified by flash chromatography on silica gel (petroleum ether:DCM:EtOAc 20:5:1) to give the pure product.<sup>3</sup>

## Characterization data for pyrroles

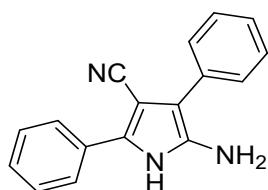

Following the general procedure B, compound **1** was obtained as a gray solid (104 mg, 80% yield). Mp > 300 °C. <sup>1</sup>H NMR (600 MHz, DMSO-*d*<sub>6</sub>) δ 11.40 (s, 1H), 7.68 (d, *J* = 7.5 Hz, 2H), 7.49 – 7.41 (m, 4H), 7.37 (t, *J* = 7.7 Hz, 2H), 7.27 (t, *J* = 7.4 Hz, 1H), 7.18 (t, *J* = 7.3 Hz, 1H), 4.84 (s, 2H). <sup>13</sup>C NMR (151 MHz, DMSO-*d*<sub>6</sub>) δ 138.0, 134.0, 131.8, 130.8, 129.6, 129.2, 127.7, 125.8, 125.1, 119.2, 105.2, 87.4. IR (thin film) ν 3373, 3267, 2211, 1600, 740 cm<sup>-1</sup>. HRMS (ESI) *m/z* calcd for [C<sub>17</sub>H<sub>13</sub>N<sub>3</sub>Na]<sup>+</sup> ([M+Na]<sup>+</sup>): 282.1002, found: 282.1003.

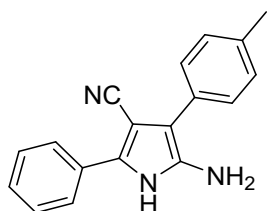

Following the general procedure B, compound **2** was obtained as a gray solid (121 mg, 89% yield). Mp 176.1-177.0 °C. <sup>1</sup>H NMR (400 MHz, DMSO-*d*<sub>6</sub>) δ 11.37 (s, 1H), 7.71 (d, *J* = 7.8 Hz, 2H), 7.46 (t, *J* = 7.7 Hz, 2H), 7.38 (d, *J* = 8.0 Hz, 2H), 7.30 (t, *J* = 7.3 Hz, 1H), 7.22 (d, *J* = 7.9 Hz, 2H), 4.78 (s, 2H), 2.32 (s, 3H). <sup>13</sup>C NMR (101 MHz, DMSO-*d*<sub>6</sub>) δ 137.6, 134.9, 131.4, 131.0, 130.8, 129.7, 129.5, 127.6, 125.0, 119.1, 105.3, 87.4, 21.2. IR (thin film) ν 3373, 3247, 2212, 1609, 1520 cm<sup>-1</sup>. HRMS (ESI) *m/z* calcd for [C<sub>18</sub>H<sub>15</sub>N<sub>3</sub>Na]<sup>+</sup> ([M+Na]<sup>+</sup>): 296.1158, found: 296.1559.

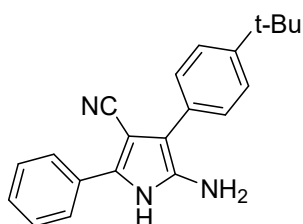

Following the general procedure B, compound **3** was obtained as a gray solid (106 mg, 67% yield). Mp 250.6-251.8 °C. <sup>1</sup>H NMR (400 MHz, DMSO-*d*<sub>6</sub>) δ 11.38 (s, 1H), 7.71 (d, *J* = 7.6 Hz, 2H), 7.51 – 7.39 (m, 6H), 7.30 (t, *J* = 7.4 Hz, 1H), 4.82 (s, 2H), 1.31 (s, 9H). <sup>13</sup>C NMR (101 MHz, DMSO-*d*<sub>6</sub>) δ 148.1, 137.7, 131.4, 131.0, 130.8, 129.5, 127.6, 127.3, 125.9, 125.0, 119.2, 105.1, 87.4, 34.7, 31.6. IR (thin film) ν 3369, 3266, 2211, 1616, 1520 cm<sup>-1</sup>. HRMS (ESI) *m/z* calcd for [C<sub>21</sub>H<sub>21</sub>N<sub>3</sub>Na]<sup>+</sup> ([M+Na]<sup>+</sup>): 338.1628, found: 338.1628.

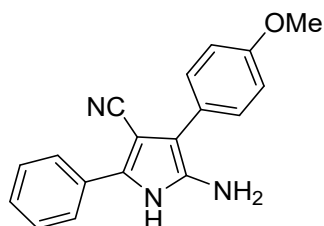

Following the general procedure B, compound **4** was obtained as a gray green solid (131 mg, 91% yield). Mp > 300 °C. <sup>1</sup>H NMR (400 MHz, DMSO-*d*<sub>6</sub>) δ 11.38 (s, 1H), 7.71 (d, *J* = 7.5 Hz, 2H), 7.50 – 7.38 (m, 4H), 7.29 (t, *J* = 7.4 Hz, 1H), 7.00 (d, *J* = 8.7 Hz, 2H), 4.73 (s, 2H), 3.78 (s, 3H). <sup>13</sup>C NMR (101 MHz, DMSO-*d*<sub>6</sub>) δ 157.7, 137.2, 131.2, 130.8, 129.5, 129.0, 127.5, 126.2, 124.9, 119.2, 114.6, 105.4, 87.4, 55.6. IR (thin film) ν 3370, 3246, 2213, 1611, 1517 cm<sup>-1</sup>. HRMS (ESI) *m/z* calcd for [C<sub>18</sub>H<sub>15</sub>N<sub>3</sub>ONa]<sup>+</sup> ([M+Na]<sup>+</sup>): 312.1107, found: 312.1107.

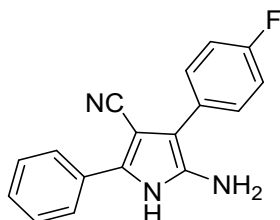

Following the general procedure B, compound **5** was obtained as a gray solid (133 mg, 96% yield). Mp 279.2-280.0 °C. <sup>1</sup>H NMR (400 MHz, DMSO-*d*<sub>6</sub>) δ 11.42 (s, 1H), 7.71 (d, *J* = 7.9 Hz, 2H), 7.53 – 7.44 (m, 4H), 7.34 – 7.22 (m, 3H), 4.86 (s, 2H). <sup>19</sup>F NMR (376 MHz, DMSO-*d*<sub>6</sub>) δ -117.10. <sup>13</sup>C NMR (101 MHz, DMSO-*d*<sub>6</sub>) δ 160.7 (d, *J* = 242.4 Hz), 137.8, 131.7, 130.7, 130.3 (d, *J* = 3.1 Hz), 129.6 (d, *J* = 8.0 Hz), 129.5, 127.7, 125.1, 119.0, 115.9 (d, *J* = 21.2 Hz), 104.3, 87.3. IR (thin film) ν 3365, 3259, 2212, 1620, 1517 cm<sup>-1</sup>. HRMS (ESI) *m/z* calcd for [C<sub>17</sub>H<sub>12</sub>FN<sub>3</sub>Na]<sup>+</sup> ([M+Na]<sup>+</sup>): 300.0907, found: 300.0907.

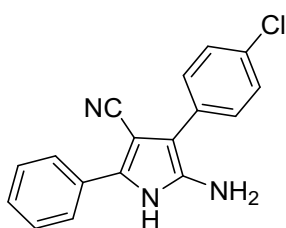

Following the general procedure B, compound **6** was obtained as a brown solid (143 mg, 72% yield). Mp 261.3-261.7 °C. <sup>1</sup>H NMR (400 MHz, DMSO-*d*<sub>6</sub>) δ 11.46 (s, 1H), 7.71 (d, *J* = 7.7 Hz, 2H), 7.59 – 7.39 (m, 6H), 7.32 (t, *J* = 7.3 Hz, 1H), 4.97 (s, 2H). <sup>13</sup>C NMR (101 MHz, DMSO-*d*<sub>6</sub>) δ 138.3, 132.9, 132.0, 130.6, 130.1, 129.5, 129.2, 129.0, 127.8, 125.1, 118.9, 103.8, 87.1. IR (thin film) ν 3369, 3260, 2211, 1614, 1506 cm<sup>-1</sup>. HRMS (ESI) *m/z* calcd for [C<sub>17</sub>H<sub>12</sub>ClN<sub>3</sub>Na]<sup>+</sup> ([M+Na]<sup>+</sup>): 316.0612, found: 316.0612.

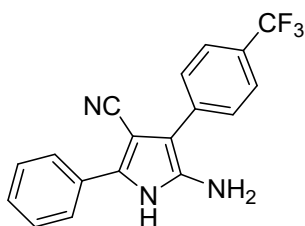

Following the general procedure B, compound **7** was obtained as a gray solid (136 mg, 83% yield). Mp 263.8-264.6 °C. <sup>1</sup>H NMR (400 MHz, DMSO-*d*<sub>6</sub>) δ 11.53 (s, 1H), 7.79 – 7.67 (m, 6H), 7.49 (t, *J* = 7.8 Hz, 2H), 7.34 (t, *J* = 7.4 Hz, 1H), 5.16 (s, 2H). <sup>19</sup>F NMR (376 MHz, DMSO-*d*<sub>6</sub>) δ -60.62. <sup>13</sup>C NMR (101 MHz, DMSO-*d*<sub>6</sub>) δ 139.2, 138.4, 132.6, 130.4, 129.5, 128.0, 127.7, 125.9, 125.9, 125.3, 118.9, 103.1, 87.0. IR (thin film) ν 3359, 3232, 2215, 1611, 1523 cm<sup>-1</sup>. HRMS (ESI) *m/z* calcd for [C<sub>18</sub>H<sub>12</sub>F<sub>3</sub>N<sub>3</sub>Na]<sup>+</sup> ([M+Na]<sup>+</sup>): 350.0876, found: 350.0876.

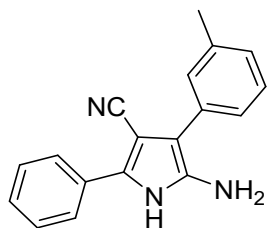

Following the general procedure B, compound **8** was obtained as a gray green solid (109 mg, 80% yield). Mp 191.3-193.5 °C. <sup>1</sup>H NMR (400 MHz, DMSO-*d*<sub>6</sub>) δ 11.40 (s, 1H), 7.72 (d, *J* = 7.5 Hz, 2H), 7.47 (t, *J* = 7.4 Hz, 2H), 7.36 – 7.24 (m, 4H), 7.03 (d, *J* = 5.4 Hz, 1H), 4.85 (s, 2H), 2.34 (s, 3H). <sup>13</sup>C NMR (101 MHz, DMSO-*d*<sub>6</sub>) δ 138.1, 137.9, 133.8, 131.6, 130.8, 129.5, 129.0, 128.3, 127.6, 126.5, 125.0, 124.8, 119.1, 105.2, 87.3, 21.7. IR (thin film) ν 3348, 2206, 1610, 1536, 693 cm<sup>-1</sup>. HRMS (ESI) *m/z* calcd for [C<sub>18</sub>H<sub>15</sub>N<sub>3</sub>Na]<sup>+</sup> ([M+Na]<sup>+</sup>): 296.1158, found: 296.1159.

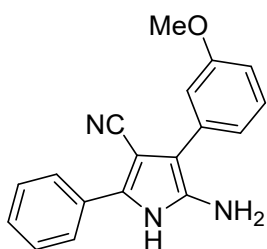

Following the general procedure B, compound **9** was obtained as a brown solid (123 mg, 85% yield). Mp 198.3-199.4 °C. <sup>1</sup>H NMR (400 MHz, DMSO-*d*<sub>6</sub>) δ 11.41 (s, 1H), 7.69 (d, *J* = 7.6 Hz, 2H), 7.41 (t, *J* = 7.5 Hz, 2H), 7.30 – 7.22 (m, 2H), 7.08 – 7.00 (m, 2H), 6.74 (d, *J* = 7.3 Hz, 1H), 4.87 (s, 2H), 3.74 (s, 3H). <sup>13</sup>C NMR (101 MHz, DMSO-*d*<sub>6</sub>) δ 159.9, 138.1, 135.3, 131.8, 130.7, 130.1, 129.5, 127.7, 125.1, 119.9, 119.2, 113.0, 111.5, 104.9, 87.3, 55.3. IR (thin film) ν 3364, 2835, 2210, 1608, 692 cm<sup>-1</sup>. HRMS (ESI) *m/z* calcd for [C<sub>18</sub>H<sub>15</sub>N<sub>3</sub>ONa]<sup>+</sup> ([M+Na]<sup>+</sup>): 312.1107, found: 312.1107.

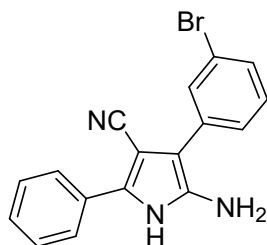

Following the general procedure B, compound **10** was obtained as a brown solid (130 mg, 77% yield). Mp 213.3-214.2 °C. <sup>1</sup>H NMR (400 MHz, DMSO-*d*<sub>6</sub>) δ 11.46 (s, 1H), 7.78 – 7.63 (m, 3H), 7.55 – 7.44 (m, 3H), 7.42 – 7.27 (m, 3H), 5.03 (s, 2H). <sup>13</sup>C NMR (101 MHz, DMSO-*d*<sub>6</sub>) δ 138.6, 136.5, 132.3, 131.1, 130.5, 129.8, 129.5, 128.3, 127.9, 126.4, 125.2, 122.5, 118.9, 103.3, 87.1. IR (thin film) ν 3371, 3276, 2209, 1619, 738 cm<sup>-1</sup>. HRMS (ESI) *m/z* calcd for [C<sub>17</sub>H<sub>12</sub>N<sub>3</sub>BrNa]<sup>+</sup> ([M+Na]<sup>+</sup>): 360.0107, found: 360.0108.

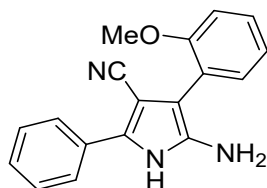

Following the general procedure B, compound **11** was obtained as a gray solid (134 mg, 93% yield).

Mp 91.2-92.0 °C. <sup>1</sup>H NMR (400 MHz, DMSO-*d*<sub>6</sub>) δ 11.35 (s, 1H), 7.72 (d, *J* = 7.8 Hz, 2H), 7.46 (t, *J* = 7.7 Hz, 2H), 7.33 – 7.23 (m, 3H), 7.08 (d, *J* = 8.1 Hz, 1H), 7.00 (t, *J* = 7.4 Hz, 1H), 4.48 (s, 2H), 3.82 (s, 3H). <sup>13</sup>C NMR (101 MHz, DMSO-*d*<sub>6</sub>) δ 156.6, 138.2, 131.1, 131.0, 130.9, 129.4, 128.2, 127.4, 124.9, 122.2, 120.9, 118.9, 111.9, 102.7, 89.1, 55.7. IR (thin film) ν 3337, 3283, 2209, 1620, 756 cm<sup>-1</sup>. HRMS (ESI) *m/z* calcd for [C<sub>18</sub>H<sub>15</sub>N<sub>3</sub>ONa]<sup>+</sup> ([M+Na]<sup>+</sup>): 312.1107, found: 312.1107.

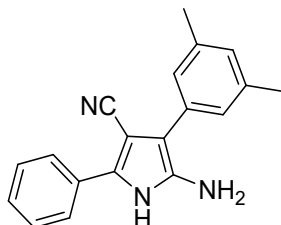

Following the general procedure B, compound **12** was obtained as a brown solid (129 mg, 90% yield). Mp 185.1-185.7 °C. <sup>1</sup>H NMR (400 MHz, DMSO-*d*<sub>6</sub>) δ 11.37 (s, 1H), 7.71 (d, *J* = 7.6 Hz, 2H), 7.47 (t, *J* = 7.7 Hz, 2H), 7.30 (t, *J* = 7.4 Hz, 1H), 7.09 (s, 2H), 6.85 (s, 1H), 4.82 (s, 2H), 2.30 (s, 6H). <sup>13</sup>C NMR (101 MHz, DMSO-*d*<sub>6</sub>) δ 137.9, 137.8, 133.7, 131.5, 130.8, 129.5, 127.6, 127.4, 125.5, 125.0, 119.2, 105.3, 87.4, 21.6. IR (thin film) ν 3336, 3259, 2212, 1618, 1600 cm<sup>-1</sup>. HRMS (ESI) *m/z* calcd for [C<sub>19</sub>H<sub>17</sub>N<sub>3</sub>Na]<sup>+</sup> ([M+Na]<sup>+</sup>): 310.1315, found: 310.1316.

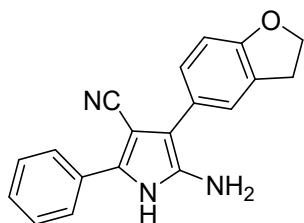

Following the general procedure B, compound **13** was obtained as a gray solid (126 mg, 84% yield). Mp 118.5-119.1 °C. <sup>1</sup>H NMR (400 MHz, DMSO-*d*<sub>6</sub>) δ 11.34 (s, 1H), 7.79 – 7.66 (m, 2H), 7.60 – 7.41 (m, 2H), 7.37 – 7.24 (m, 2H), 7.17 (d, *J* = 6.7 Hz, 1H), 6.81 (d, *J* = 7.0 Hz, 1H), 4.69 (s, 2H), 4.54 (t, *J* = 8.8 Hz, 2H), 3.21 (t, *J* = 8.8 Hz, 2H). <sup>13</sup>C NMR (101 MHz, DMSO-*d*<sub>6</sub>) δ 158.3, 137.1, 131.0, 130.9, 129.5, 128.1, 127.6, 127.4, 126.0, 124.9, 124.8, 119.2, 109.5, 106.0, 87.6, 71.4, 29.7. IR (thin film) ν 3353, 3293, 2209, 1612, 1537 cm<sup>-1</sup>. HRMS (ESI) *m/z* calcd for [C<sub>19</sub>H<sub>15</sub>N<sub>3</sub>ONa]<sup>+</sup> ([M+Na]<sup>+</sup>): 324.1107, found: 324.1109.

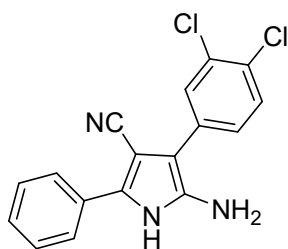

Following the general procedure B, compound **14** was obtained as a gray solid (119 mg, 73% yield). Mp 225.4-226.6 °C. <sup>1</sup>H NMR (400 MHz, DMSO-*d*<sub>6</sub>) δ 11.54 (s, 1H), 7.77 – 7.62 (m, 4H), 7.54 – 7.43 (m, 3H), 7.33 (t, *J* = 7.0 Hz, 1H), 5.13 (s, 2H). <sup>13</sup>C NMR (101 MHz, DMSO-*d*<sub>6</sub>) δ 139.0, 134.8, 132.5, 131.7, 131.1, 130.4, 129.5, 128.9, 128.0, 127.7, 127.5, 125.2, 118.8, 102.3, 86.9. IR (thin film) ν 3424, 3340, 2210, 1616, 1502 cm<sup>-1</sup>. HRMS (ESI) *m/z* calcd for [C<sub>17</sub>H<sub>11</sub>Cl<sub>2</sub>N<sub>3</sub>Na]<sup>+</sup> ([M+Na]<sup>+</sup>): 350.0222, found: 350.0221.



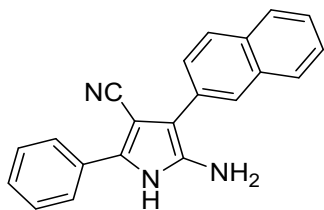

Following the general procedure B, compound **15** was obtained as a gray solid (139 mg, 90% yield). Mp 211.7-212.9 °C. <sup>1</sup>H NMR (400 MHz, DMSO-*d*<sub>6</sub>) δ 11.47 (s, 1H), 7.95 (d, *J* = 7.7 Hz, 2H), 7.89 (d, *J* = 7.8 Hz, 2H), 7.76 (d, *J* = 7.8 Hz, 2H), 7.71 (d, *J* = 8.9 Hz, 1H), 7.53 – 7.43 (m, 4H), 7.33 (t, *J* = 7.3 Hz, 1H), 5.02 (s, 2H). <sup>13</sup>C NMR (101 MHz, DMSO-*d*<sub>6</sub>) δ 138.4, 133.9, 131.9, 131.6, 131.6, 130.7, 129.5, 128.4, 128.1, 127.9, 127.7, 126.6, 125.8, 125.4, 125.1, 119.2, 105.0, 87.4. IR (thin film) ν 3373, 3253, 2212, 1608, 1533 cm<sup>-1</sup>. HRMS (ESI) *m/z* calcd for [C<sub>21</sub>H<sub>15</sub>N<sub>3</sub>Na]<sup>+</sup> ([M+Na]<sup>+</sup>): 332.1158, found: 332.1157.

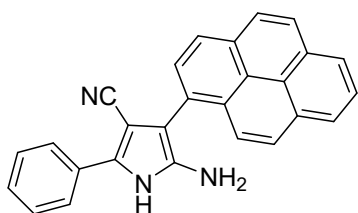

Following the general procedure B, compound **16** was obtained as a yellow solid (190 mg, 99% yield). Mp 144.3-145.7 °C. <sup>1</sup>H NMR (400 MHz, DMSO-*d*<sub>6</sub>) δ 11.64 (s, 1H), 8.35 (d, *J* = 7.9 Hz, 1H), 8.33 – 8.28 (m, 2H), 8.24 – 8.18 (m, 3H), 8.14 – 8.07 (m, 2H), 8.05 (d, *J* = 7.9 Hz, 1H), 7.82 (d, *J* = 7.5 Hz, 2H), 7.51 (t, *J* = 7.8 Hz, 2H), 7.34 (t, *J* = 7.4 Hz, 1H), 4.73 (s, 2H). <sup>13</sup>C NMR (101 MHz, DMSO-*d*<sub>6</sub>) δ 136.3, 129.2, 128.9, 128.6, 128.4, 127.8, 127.1, 126.9, 126.6, 126.5, 125.3, 125.2, 125.1, 125.0, 124.2, 123.7, 123.0, 122.9, 122.8, 122.5, 122.4, 122.1, 116.4, 101.7, 87.4. IR (thin film) ν 3447, 2211, 1617, 1508, 692 cm<sup>-1</sup>. HRMS (ESI) *m/z* calcd for [C<sub>27</sub>H<sub>17</sub>N<sub>3</sub>Na]<sup>+</sup> ([M+Na]<sup>+</sup>): 406.1315, found: 406.1308.

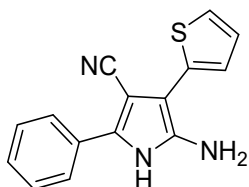

Following the general procedure B, compound **17** was obtained as a gray solid (93 mg, 70% yield). Mp 175.4-175.9 °C. <sup>1</sup>H NMR (400 MHz, DMSO-*d*<sub>6</sub>) δ 11.5 (s, 1H), 7.7 (d, *J* = 7.0 Hz, 2H), 7.5 – 7.4 (m, 3H), 7.4 – 7.3 (m, 1H), 7.2 (s, 1H), 7.1 (s, 1H), 5.0 (s, 2H). <sup>13</sup>C NMR (101 MHz, DMSO-*d*<sub>6</sub>) δ 138.1, 135.7, 131.9, 130.4, 129.5, 127.9, 125.2, 123.2, 122.9, 118.8, 99.6, 86.9. IR (thin film) ν 3356, 3258, 2211, 1616, 1523 cm<sup>-1</sup>. HRMS (ESI) *m/z* calcd for [C<sub>15</sub>H<sub>11</sub>N<sub>3</sub>SNa]<sup>+</sup> ([M+Na]<sup>+</sup>): 288.0566, found: 288.0566.

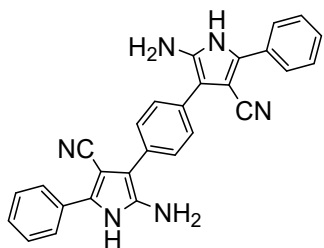

Following the general procedure B, compound **18** was obtained as a brown solid (176 mg, 80% yield). Mp >300 °C. <sup>1</sup>H NMR (400 MHz, DMSO-*d*<sub>6</sub>) δ 11.46 (s, 2H), 7.80 – 7.67 (m, 4H), 7.60 – 7.52 (m, 4H), 7.50 – 7.43 (m, 4H), 7.34 – 7.29 (m, 2H), 4.88 (s, 4H). <sup>13</sup>C NMR (101 MHz, DMSO-*d*<sub>6</sub>) δ 137.9, 131.6, 131.0, 130.7, 129.5, 127.7, 127.6, 125.0, 119.2, 105.2, 87.2. IR (thin film) ν 3359, 3247, 2212, 1595, 1522 cm<sup>-1</sup>. HRMS (ESI) *m/z* calcd for [C<sub>28</sub>H<sub>20</sub>N<sub>6</sub>Na]<sup>+</sup> ([M+Na]<sup>+</sup>): 463.1642, found: 463.1642.

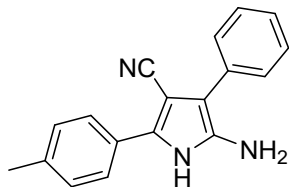

Following the general procedure B, compound **21** was obtained as a gray solid (120 mg, 88% yield). Mp 210.3-211.4 °C. <sup>1</sup>H NMR (400 MHz, DMSO-*d*<sub>6</sub>) δ 11.35 (s, 1H), 7.62 (d, *J* = 8.2 Hz, 2H), 7.49 (d, *J* = 7.2 Hz, 2H), 7.41 (t, *J* = 7.7 Hz, 2H), 7.28 (d, *J* = 8.1 Hz, 2H), 7.21 (t, *J* = 7.3 Hz, 1H), 4.82 (s, 2H), 2.33 (s, 3H). <sup>13</sup>C NMR (101 MHz, DMSO-*d*<sub>6</sub>) δ 137.5, 137.2, 134.1, 132.1, 130.0, 129.1, 128.0, 127.6, 125.7, 125.0, 119.2, 104.8, 86.7, 21.3. IR (thin film) ν 3461, 3376, 2213, 1617, 1508 cm<sup>-1</sup>. HRMS (ESI) *m/z* calcd for [C<sub>18</sub>H<sub>15</sub>N<sub>3</sub>Na]<sup>+</sup> ([M+Na]<sup>+</sup>): 296.1158, found: 296.1158.

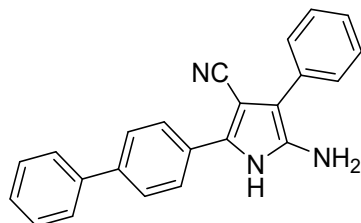

Following the general procedure B, compound **22** was obtained as a green solid (159 mg, 95% yield). Mp 236.3-238.0 °C. <sup>1</sup>H NMR (400 MHz, DMSO-*d*<sub>6</sub>) δ 11.54 (s, 1H), 7.87 – 7.79 (m, 4H), 7.74 (d, *J* = 7.3 Hz, 2H), 7.54 – 7.47 (m, 4H), 7.43 (t, *J* = 7.7 Hz, 2H), 7.38 (t, *J* = 7.3 Hz, 1H), 7.23 (t, *J* = 7.3 Hz, 1H), 4.94 (s, 2H). <sup>13</sup>C NMR (101 MHz, DMSO-*d*<sub>6</sub>) δ 139.8, 139.0, 138.2, 133.9, 131.2, 129.7, 129.5, 129.1, 128.0, 127.6, 126.9, 125.8, 125.4, 119.2, 105.3, 87.5. IR (thin film) ν 3375, 3254, 2212, 1600, 694 cm<sup>-1</sup>. HRMS (ESI) *m/z* calcd for [C<sub>23</sub>H<sub>17</sub>N<sub>3</sub>Na]<sup>+</sup> ([M+Na]<sup>+</sup>): 358.1315, found: 358.1314.

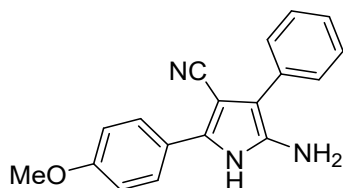

Following the general procedure B, compound **23** was obtained as a gray solid (138 mg, 82% yield). Mp 248.3-249.5 °C. <sup>1</sup>H NMR (400 MHz, DMSO-*d*<sub>6</sub>) δ 11.27 (s, 1H), 7.65 (d, *J* = 8.6 Hz, 2H), 7.48 (d, *J* = 7.6 Hz, 2H), 7.40 (t, *J* = 7.6 Hz, 2H), 7.20 (t, *J* = 7.2 Hz, 1H), 7.06 (d, *J* = 8.6 Hz, 2H), 4.77 (s, 2H), 3.80 (s, 3H). <sup>13</sup>C NMR (101 MHz, DMSO-*d*<sub>6</sub>) δ 159.1, 137.1, 134.2, 132.4, 129.1, 127.5, 126.7, 125.6, 123.4, 119.4, 114.9, 104.6, 86.1, 55.7. IR (thin film) ν 3375, 3253, 2212, 1616, 1508 cm<sup>-1</sup>. HRMS (ESI) *m/z* calcd for [C<sub>18</sub>H<sub>14</sub>N<sub>3</sub>O]<sup>-</sup> ([M-H]<sup>-</sup>): 288.1131, found: 288.1129.

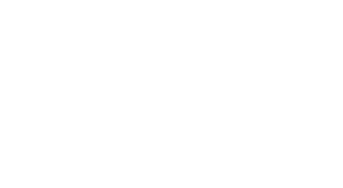

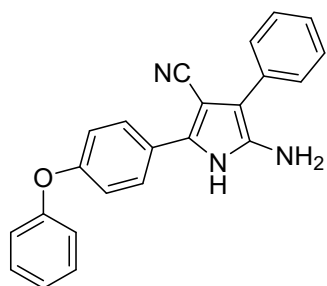

Following the general procedure B, compound **24** was obtained as a green solid (167 mg, 95% yield). Mp 227.2-228.0 °C. <sup>1</sup>H NMR (400 MHz, DMSO-*d*<sub>6</sub>) δ 11.37 (s, 1H), 7.73 (d, *J* = 8.5 Hz, 2H), 7.49 (d, *J* = 7.5 Hz, 2H), 7.44 – 7.40 (m, 3H), 7.24 – 7.16 (m, 3H), 7.13 – 7.06 (m, 4H), 4.84 (s, 2H). <sup>13</sup>C NMR (101 MHz, DMSO-*d*<sub>6</sub>) δ 157.3, 156.8, 138.1, 134.5, 132.0, 131.1, 129.5, 128.0, 127.4, 126.6, 126.2, 124.7, 120.0, 119.8, 119.6, 105.4, 87.3. IR (thin film) ν 3374, 3258, 2210, 1588, 1508 cm<sup>-1</sup>. HRMS (ESI) *m/z* calcd for [C<sub>23</sub>H<sub>17</sub>N<sub>3</sub>NaO]<sup>+</sup> ([M+Na]<sup>+</sup>): 374.1264, found: 374.1265.

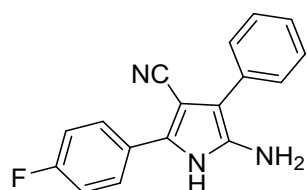

Following the general procedure B, compound **25** was obtained as a gray solid (126 mg, 91% yield). Mp 233.6-243.3 °C. <sup>1</sup>H NMR (400 MHz, DMSO-*d*<sub>6</sub>) δ 11.43 (s, 1H), 7.74 (dd, *J* = 8.2, 5.5 Hz, 2H), 7.49 (d, *J* = 7.5 Hz, 2H), 7.41 (t, *J* = 7.5 Hz, 2H), 7.34 (t, *J* = 8.7 Hz, 2H), 7.22 (t, *J* = 7.2 Hz, 1H), 4.86 (s, 2H). <sup>19</sup>F NMR (376 MHz, DMSO-*d*<sub>6</sub>) δ -114.25. <sup>13</sup>C NMR (101 MHz, DMSO-*d*<sub>6</sub>) δ 161.7 (d, *J* = 245.0 Hz), 137.8, 133.9, 131.0, 129.1, 127.6, 127.4 (d, *J* = 3.3 Hz), 127.2 (d, *J* = 8.2 Hz), 125.8, 119.0, 116.5 (d, *J* = 21.8 Hz), 105.1, 87.3. IR (thin film) ν 3376, 3262, 2212, 1615, 1509 cm<sup>-1</sup>. HRMS (ESI) *m/z* calcd for [C<sub>17</sub>H<sub>12</sub>FN<sub>3</sub>Na]<sup>+</sup> ([M+Na]<sup>+</sup>): 300.0907, found: 300.0907.

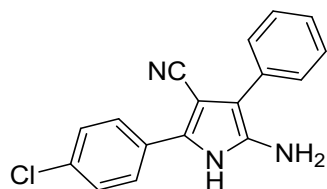

Following the general procedure B, compound **26** was obtained as a gray solid (145 mg, 99% yield). Mp 233.6-234.6 °C. <sup>1</sup>H NMR (400 MHz, DMSO-*d*<sub>6</sub>) δ 11.50 (s, 1H), 7.72 (d, *J* = 8.6 Hz, 2H), 7.55 (d, *J* = 8.6 Hz, 2H), 7.49 (d, *J* = 7.5 Hz, 2H), 7.42 (t, *J* = 7.6 Hz, 2H), 7.22 (t, *J* = 7.2 Hz, 1H), 4.92 (s, 2H). <sup>13</sup>C NMR (101 MHz, DMSO-*d*<sub>6</sub>) δ 138.3, 133.8, 131.8, 130.2, 129.5, 129.5, 129.1, 127.7, 126.5, 125.9, 118.9, 105.4, 87.9. IR (thin film) ν 3376, 3259, 2212, 1614, 1507 cm<sup>-1</sup>. HRMS (ESI) *m/z* calcd for [C<sub>17</sub>H<sub>12</sub>ClN<sub>3</sub>Na]<sup>+</sup> ([M+Na]<sup>+</sup>): 316.0612, found: 316.0610.

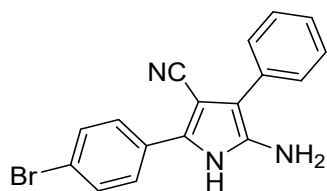

Following the general procedure B, compound **27** was obtained as a gray solid (147 mg, 87% yield). Mp 244.8-245.6 °C. <sup>1</sup>H NMR (400 MHz, DMSO-*d*<sub>6</sub>) δ 11.52 (s, 1H), 7.71 – 7.63 (m, 4H), 7.49 (d, *J* = 7.5 Hz, 2H), 7.42 (t, *J* = 7.6 Hz, 2H), 7.23 (t, *J* = 7.2 Hz, 1H), 4.94 (s, 2H). <sup>13</sup>C NMR (101 MHz,

DMSO-*d*<sub>6</sub>) δ 138.4, 133.8, 132.4, 130.2, 129.9, 129.1, 127.7, 126.8, 125.9, 120.3, 118.9, 105.4, 87.9. IR (thin film) ν 3375, 3244, 2214, 1616, 1508 cm<sup>-1</sup>. HRMS (ESI) *m/z* calcd for [C<sub>17</sub>H<sub>12</sub>BrN<sub>3</sub>Na]<sup>+</sup> ([M+Na]<sup>+</sup>): 360.0107, found: 360.0107.

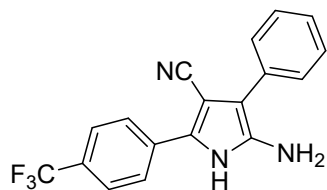

Following the general procedure B, compound **28** was obtained as a gray solid (123 mg, 75% yield). Mp 227.3-228.1 °C. <sup>1</sup>H NMR (400 MHz, DMSO-*d*<sub>6</sub>) δ 11.43 (s, 1H), 7.74 (dd, *J* = 8.2, 5.5 Hz, 2H), 7.49 (d, *J* = 7.5 Hz, 2H), 7.41 (t, *J* = 7.5 Hz, 2H), 7.34 (t, *J* = 8.7 Hz, 2H), 7.22 (t, *J* = 7.2 Hz, 1H), 4.86 (s, 2H). <sup>19</sup>F NMR (376 MHz, DMSO-*d*<sub>6</sub>) δ -56.09. <sup>13</sup>C NMR (101 MHz, DMSO-*d*<sub>6</sub>) δ 139.2, 134.4, 133.5, 129.2, 129.1, 127.8, 126.5 (q, *J* = 3.9 Hz), 126.1, 125.0, 124.7 (q, *J* = 271.7 Hz), 118.7, 106.1, 89.2. IR (thin film) ν 3376, 3260, 2211, 1614, 1510 cm<sup>-1</sup>. HRMS (ESI) *m/z* calcd for [C<sub>18</sub>H<sub>12</sub>F<sub>3</sub>N<sub>3</sub>Na]<sup>+</sup> ([M+Na]<sup>+</sup>): 350.0876, found: 350.0875.

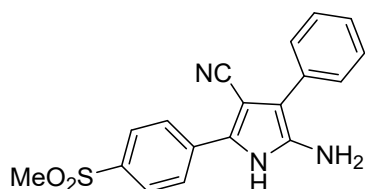

Following the general procedure B, compound **29** was obtained as a green solid (142 mg, 84% yield). Mp 253.3-254.2 °C. <sup>1</sup>H NMR (400 MHz, DMSO-*d*<sub>6</sub>) δ 11.67 (s, 1H), 8.00 – 7.82 (m, 4H), 7.52 – 7.35 (m, 4H), 7.26 – 7.13 (m, 1H), 5.06 (s, 2H), 3.19 (s, 3H). <sup>13</sup>C NMR (101 MHz, DMSO-*d*<sub>6</sub>) δ 139.6, 138.5, 135.2, 133.4, 129.2, 128.8, 128.3, 127.8, 126.2, 124.8, 118.6, 106.4, 89.8, 44.0. IR (thin film) ν 3422, 2211, 1617, 1590, 1509 cm<sup>-1</sup>. HRMS (ESI) *m/z* calcd for [C<sub>18</sub>H<sub>15</sub>N<sub>3</sub>O<sub>2</sub>SNa]<sup>+</sup> ([M+Na]<sup>+</sup>): 360.0777, found: 360.0776.

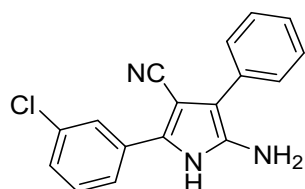

Following the general procedure B, compound **30** was obtained as a gray solid (102 mg, 69% yield). Mp 219.9-221.0 °C. <sup>1</sup>H NMR (400 MHz, DMSO-*d*<sub>6</sub>) δ 11.70 (s, 1H), 7.81 – 7.67 (m, 2H), 7.54 – 7.46 (m, 3H), 7.42 (t, *J* = 7.5 Hz, 2H), 7.34 (d, *J* = 7.7 Hz, 1H), 7.23 (t, *J* = 7.2 Hz, 1H), 5.00 (s, 2H). <sup>13</sup>C NMR (101 MHz, DMSO-*d*<sub>6</sub>) δ 138.7, 134.2, 133.7, 132.6, 131.4, 129.4, 129.1, 127.7, 127.0, 125.9, 124.2, 123.3, 118.8, 105.5, 88.3. IR (thin film) ν 3368, 3259, 2211, 1615, 1510 cm<sup>-1</sup>. HRMS (ESI) *m/z* calcd for [C<sub>17</sub>H<sub>12</sub>ClN<sub>3</sub>Na]<sup>+</sup> ([M+Na]<sup>+</sup>): 316.0612, found: 316.0612.

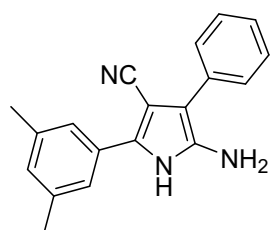

Following the general procedure B, compound **31** was obtained as a gray solid (98 mg, 68% yield).

Mp 209.6-210.7 °C. <sup>1</sup>H NMR (400 MHz, DMSO-*d*<sub>6</sub>) δ 11.31 (s, 1H), 7.49 (d, *J* = 7.7 Hz, 2H), 7.41 (t, *J* = 7.6 Hz, 2H), 7.34 (s, 2H), 7.21 (t, *J* = 7.3 Hz, 1H), 6.96 (s, 1H), 4.82 (s, 2H), 2.32 (s, 6H). <sup>13</sup>C NMR (101 MHz, DMSO-*d*<sub>6</sub>) δ 138.4, 137.7, 134.1, 131.9, 130.7, 129.2, 129.1, 127.6, 125.7, 122.8, 119.2, 104.9, 87.0, 21.5. IR (thin film) ν 3360, 3257, 2213, 1618, 1509 cm<sup>-1</sup>. HRMS (ESI) *m/z* calcd for [C<sub>19</sub>H<sub>17</sub>N<sub>3</sub>Na]<sup>+</sup> ([M+Na]<sup>+</sup>): 310.1315, found: 310.1314.

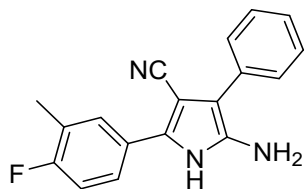

Following the general procedure B, compound **32** was obtained as a gray solid (143 mg, 98% yield). Mp 197.5-198.4 °C. <sup>1</sup>H NMR (400 MHz, DMSO-*d*<sub>6</sub>) δ 11.45 (s, 1H), 7.62 – 7.55 (m, 2H), 7.49 (d, *J* = 7.4 Hz, 2H), 7.41 (t, *J* = 7.7 Hz, 2H), 7.27 (t, *J* = 9.1 Hz, 1H), 7.21 (t, *J* = 7.3 Hz, 1H), 4.87 (s, 2H), 2.29 (s, 3H). <sup>19</sup>F NMR (376 MHz, DMSO-*d*<sub>6</sub>) δ -118.62. <sup>13</sup>C NMR (101 MHz, DMSO-*d*<sub>6</sub>) δ 160.3 (d, *J* = 244.5 Hz), 137.7, 134.0, 131.1, 129.1, 128.4 (d, *J* = 5.0 Hz), 127.6, 127.1 (d, *J* = 3.4 Hz), 125.7, 125.3 (d, *J* = 17.7 Hz), 124.7 (d, *J* = 8.1 Hz), 119.1, 116.1 (d, *J* = 22.7 Hz), 104.9, 87.1, 14.8. IR (thin film) ν 3375, 3260, 2211, 1618, 1508 cm<sup>-1</sup>. HRMS (ESI) *m/z* calcd for [C<sub>18</sub>H<sub>14</sub>FN<sub>3</sub>Na]<sup>+</sup> ([M+Na]<sup>+</sup>): 314.1064, found: 314.1064.

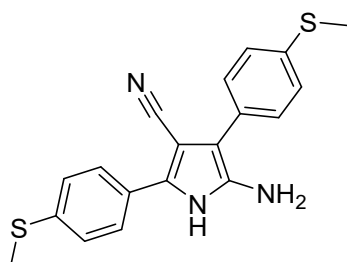

Following the general procedure B, compound **33** was obtained as a green solid (87% yield). <sup>1</sup>H NMR (400 MHz, DMSO-*d*<sub>6</sub>) δ 11.37 (s, 1H), 7.65 (d, *J* = 8.4 Hz, 2H), 7.43 (d, *J* = 8.3 Hz, 2H), 7.39 – 7.26 (m, 4H), 4.85 (s, 2H), 2.50 (s, 6H). <sup>13</sup>C NMR (101 MHz, DMSO-*d*<sub>6</sub>) δ 137.2, 137.1, 134.4, 130.8, 130.1, 127.5, 126.6, 126.5, 126.2, 124.8, 118.5, 104.0, 86.3, 15.0, 14.5. IR (thin film) ν 3370, 3243, 2211, 1610, 1507 cm<sup>-1</sup>. HRMS (ESI) *m/z* calcd for [C<sub>19</sub>H<sub>17</sub>N<sub>3</sub>S<sub>2</sub>Na]<sup>+</sup> ([M+Na]<sup>+</sup>): 374.0756, found: 374.0756.

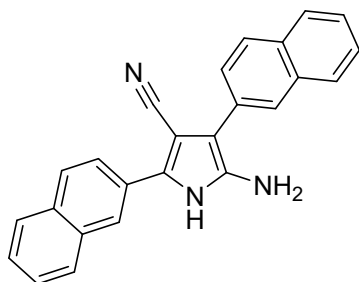

Following the general procedure B, compound **34** was obtained as a green solid (90% yield). <sup>1</sup>H NMR (400 MHz, DMSO-*d*<sub>6</sub>) δ 11.66 (s, 1H), 8.21 (s, 1H), 8.03 (d, *J* = 8.7 Hz, 1H), 8.01 – 7.86 (m, 7H), 7.73 (d, *J* = 9.5 Hz, 1H), 7.59 – 7.45 (m, 4H), 5.12 (s, 2H). <sup>13</sup>C NMR (101 MHz, DMSO-*d*<sub>6</sub>) δ 139.4, 134.4, 134.1, 132.9, 132.2, 132.1, 132.1, 129.6, 128.9, 128.7, 128.7, 128.6, 128.4, 127.9, 127.1, 126.3, 126.0, 124.0, 123.6, 119.8, 105.7, 88.5. IR (thin film) ν 3375, 2212, 1613, 1599, 1524 cm<sup>-1</sup>. HRMS (ESI) *m/z* calcd for [C<sub>25</sub>H<sub>17</sub>N<sub>3</sub>Na]<sup>+</sup> ([M+Na]<sup>+</sup>): 382.1315, found: 382.1315.

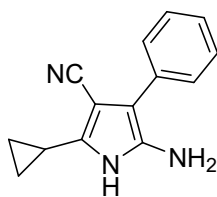

Following the general procedure B, compound **35** was obtained as a white solid (48 mg, 43% yield). Mp 130.5-131.2 °C. <sup>1</sup>H NMR (400 MHz, DMSO-*d*<sub>6</sub>) δ 10.64 (s, 1H), 7.41 (d, *J* = 7.4 Hz, 2H), 7.35 (t, *J* = 7.7 Hz, 2H), 7.14 (t, *J* = 7.2 Hz, 1H), 4.51 (s, 2H), 1.98 – 1.88 (m, 1H), 0.99 – 0.91 (m, 2H), 0.84 – 0.77 (m, 2H). <sup>13</sup>C NMR (101 MHz, DMSO-*d*<sub>6</sub>) δ 137.3, 134.8, 134.6, 129.0, 127.1, 125.1, 118.7, 102.5, 87.1, 8.5, 7.5. IR (thin film) ν 3398, 2923, 2207, 1600, 1506 cm<sup>-1</sup>. HRMS (ESI) *m/z* calcd for [C<sub>14</sub>H<sub>13</sub>N<sub>3</sub>Na]<sup>+</sup> ([M+Na]<sup>+</sup>): 246.1002, found: 246.1002.

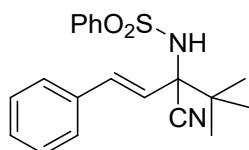

Following the general procedure B, compound **38** was obtained as a white solid (129 mg, 73% yield). Mp 134.8-135.1 °C. <sup>1</sup>H NMR (600 MHz, Chloroform-*d*) δ 7.78 (d, *J* = 7.3 Hz, 2H), 7.55 (t, *J* = 7.5 Hz, 1H), 7.40 (t, *J* = 7.9 Hz, 2H), 7.36 – 7.31 (m, 3H), 7.26 – 7.22 (m, 2H), 6.75 (d, *J* = 16.1 Hz, 1H), 5.91 (d, *J* = 16.1 Hz, 1H), 5.38 (s, 1H), 1.12 (s, 9H). <sup>13</sup>C NMR (151 MHz, Chloroform-*d*) δ 139.9, 135.8, 134.9, 133.3, 129.1, 129.0, 128.8, 128.2, 127.1, 121.1, 117.1, 66.6, 40.3, 25.0. IR (thin film) ν 3307, 2969, 2245, 1645, 1157 cm<sup>-1</sup>. HRMS (ESI) *m/z* calcd for [C<sub>20</sub>H<sub>22</sub>N<sub>2</sub>NaSO<sub>2</sub>]<sup>+</sup> ([M+Na]<sup>+</sup>): 377.1294, found: 377.1293.

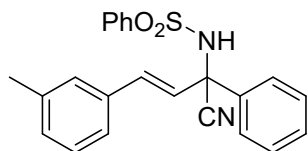

Compound **39** was obtained as a white solid (745 mg, 96% yield). <sup>1</sup>H NMR (400 MHz, Chloroform-*d*) δ 7.75 (d, *J* = 7.4 Hz, 2H), 7.61 – 7.53 (m, 3H), 7.43 (t, *J* = 7.8 Hz, 2H), 7.39 – 7.32 (m, 3H), 7.20 (t, *J* = 7.8 Hz, 1H), 7.14 – 7.04 (m, 3H), 6.90 – 6.83 (m, 1H), 6.09 (d, *J* = 15.8 Hz, 1H), 5.37 (s, 1H), 2.32 (s, 3H). <sup>13</sup>C NMR (151 MHz, Chloroform-*d*) δ 140.0, 138.4, 136.5, 134.4, 133.3, 133.2, 129.9, 129.6, 129.3, 129.0, 128.6, 128.0, 127.7, 125.9, 125.0, 124.5, 117.1, 62.3, 21.3. IR (thin film) ν 3467, 3311, 2247, 1646, 1605 cm<sup>-1</sup>. HRMS (ESI) *m/z* calcd for [C<sub>23</sub>H<sub>20</sub>N<sub>2</sub>O<sub>2</sub>SNa]<sup>+</sup> ([M+Na]<sup>+</sup>): 411.1135, found: 411.1135.

## Mechanism experiments

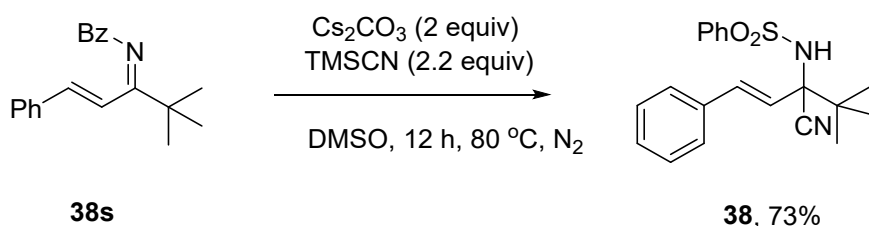

To a 25 mL of Schlenk tube with a stir bar was added the  $\alpha,\beta$ -unsaturated sulfonimine (0.5 mmol),  $\text{Cs}_2\text{CO}_3$  (1 mmol, 326 mg) and DMSO (4 mL) under a nitrogen atmosphere. Upon dissolution the imine, TMSCN (138  $\mu\text{L}$ , 2.2 equiv) was added, and the mixture was stirred for 10 s - 1 min until the solution turned red. Then, the mixture was heated to 80  $^\circ\text{C}$  in an oil bath for 12 h. Then, the mixture was pooled into 20 mL of water then extracted with EA/PE=1:1 (30mL\*3). The organic phase was washed three times with a large amount of water, dried over anhydrous magnesium sulfate, evaporated to remove the solvent, and separated with a silica gel column (PE/EA=10:1-PE/EA=3:1). **38s** Not afford the desired pyrrole product but afforded 1,2-cyano addition product **38** in 73% yield.

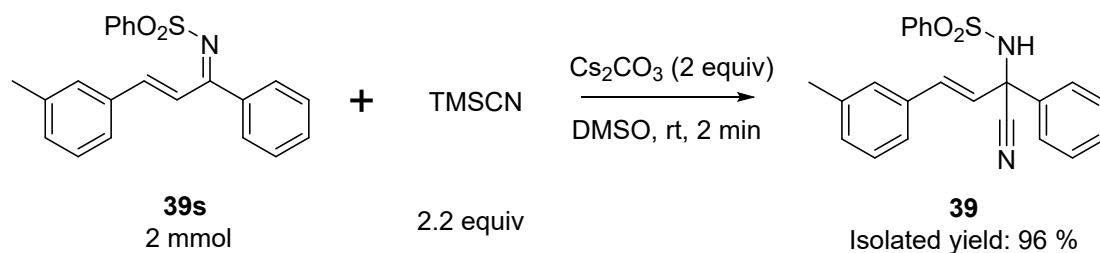

To a 50 mL of Schlenk tube with a stir bar was added the  $\alpha,\beta$ -unsaturated sulfonimine (2 mmol),  $\text{Cs}_2\text{CO}_3$  (4 mmol, 1.3 g) and DMSO (16 mL) under a nitrogen atmosphere. Upon dissolution the imine, TMSCN (552  $\mu\text{L}$ , 4.4 equiv) was added, and the mixture was stirred for 1-5 min until complete disappearance of raw materials detected by TLC. Then, the mixture was pooled into 20 mL of water then extracted with EA/PE=1:1 (30mL\*3). The organic phase was washed three times with a large amount of water, dried over anhydrous magnesium sulfate, evaporated to remove the solvent, and separated with a silica gel column(PE/EA=10:1-PE/EA=3:1).

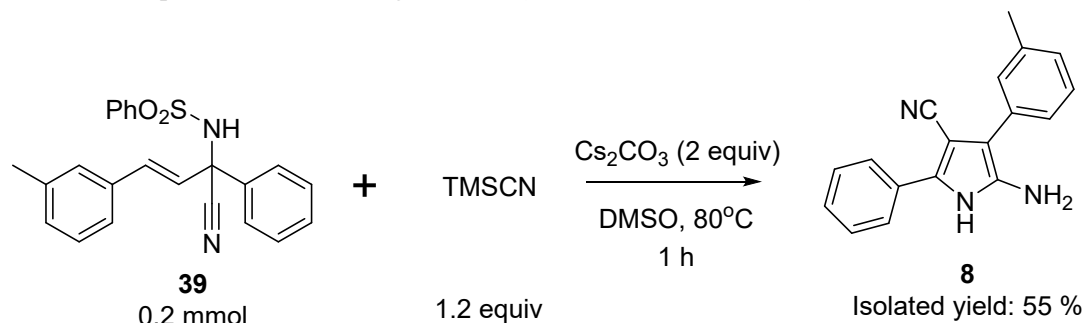

To a 25 mL of Schlenk tube with a stir bar was added the 1,2-addition product **39** (0.2 mmol),  $\text{Cs}_2\text{CO}_3$  (0.4 mmol, 131 mg) and DMSO (1.5 mL) under a nitrogen atmosphere. Upon dissolution compound **39**, TMSCN (30  $\mu\text{L}$ , 1.2 equiv) was added. Then, the mixture was heated to 80  $^\circ\text{C}$  in an oil bath for

1 h. After cooling to rt, the solution was pooled into 5 mL of ice water until no solid precipitate. The desired pyrrole can be obtained through filtration without further purification.

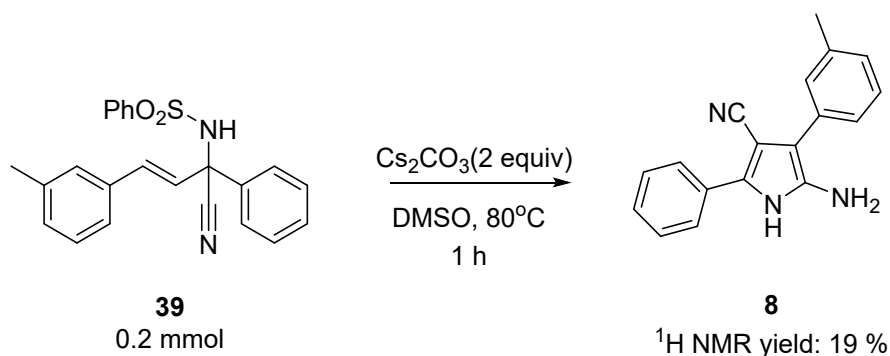

To a 25 mL of Schlenk tube with a stir bar was added the 1,2-addition product **39** (0.2 mmol),  $\text{Cs}_2\text{CO}_3$  (0.4 mmol, 131 mg) and DMSO (1.5 mL) under a nitrogen atmosphere. Upon dissolution the compound **39**, TMS-CN (30  $\mu\text{L}$ , 1.2 equiv) was added. Then, the mixture was heated to 80  $^\circ\text{C}$  in an oil bath for 1 h. After cooling to rt, Then, the mixture was pooled into 20 mL of water then extracted with EA/PE=1:1 (30mL\*3). The organic phase was washed three times with a large amount of water, dried over anhydrous magnesium sulfate, evaporated to remove the solvent, and added  $\text{CH}_2\text{Br}_2$  (0.2 mmol, 14  $\mu\text{L}$ ) as an internal standard.



# Theoretical Study

Density functional theory (DFT) calculations have also been conducted on the basis of the experimental results to investigate the reaction mechanisms of cyclization and double cyanation. Since the reaction can be carried out starting from **39** without additional TMSCN but much less yields, the calculation of reversible CN elimination from **1SP** was initially considered. Deprotonation of **1SP** should be a readily process in the base reaction condition, and the intermediate **1A** can then eliminate the cyanide ion via **TS1** with a barrier of 13.3 kcal/mol to afford **1s**. The isolated CN<sup>-</sup> ion therefore can add onto the carbon C4 of **1s** to deliver the intermediate **1B** through the transition state **TS2**, however, with a bit higher barrier of 23.0 kcal/mol indicating that there may be a competition between 1,2- and 1,4-addition of **1s** to reverse to the **1SP** or forward to the pyrrole without external TMSCN at high temperature. Transition state of cyanide addition onto C3 (**TS6**) has also been located but with too high barrier to be achieved.

Next, reaction pathways of rearrangement, desulfurization and second cyanide addition from **1B** were calculated. The rearranged intermediate **int1** with a relative free enthalpy -3.6 kcal/mol was found to be the more favorable conformation than **1B**. In addition, transition states of desulfurization (**TS7**) and second cyanide addition (**TS8**) have been located with barriers of 52.2 and 53.4 kcal/mol, respectively, which result in the less stable intermediates **int7** and **int8**. Transition state of desulfurization from **int1** was then found to be the most possible pathway with only 14.5 kcal/mol of barrier leading to the much stable intermediate **int2** with -11.4 kcal/mol of free enthalpy. Addition of second CN<sup>-</sup> onto **int1** has also been considered, and as expected, **TS9** with very high barrier of 46.1 kcal/mol was located due to the deconjugation as **TS8**.

Cyclization and second cyanide addition from **int2** were therefore calculated. Transition state of cyclization, **TS4**, with a barrier of 16.6 kcal/mol was located to be the much lower state of reaction pathway. It is noteworthy that transition state of cyclization cannot be located starting from the intermediates **1B** and **int1**. Although the transition state of second cyanide addition, **TS12**, can be found from **int2**, the barrier is larger almost 10 kcal/mol than that of **TS4**. The annulated intermediate **int3** then should perform the proton transfer to afford intermediate **int4** with a free enthalpy of -17.5 kcal/mol. The second cyanide then can add onto **int4** via the transition state **TS5** to deliver the intermediate **int5** which will rearrange to the aromatic conformer **int6** with a much stable free energy of -20.2 kcal/mol.

On the other hand, we have also considered the protonation pathway from **1B** despite in the base reaction condition. Although the protonation intermediate **int10** is a stable species, second cyanide addition onto **int10** should overcome a much higher transition state, **TS10**. Besides, intermediate **int11** is less stable, and the relative free enthalpy of desulfurization, **TS11**, is even slightly higher than that of **TS10**. Since the standard reaction is in a base condition, the protonation pathway therefore may not be the favorable pathway.

DFT computational studies were carried out at B3LYP<sup>4</sup>-D3<sup>5</sup>(SMD<sup>6</sup>)/Def2-TZVP<sup>7</sup>//B3LYP-D3/Def2-SVP level of theory, in which the D3 dispersion correction is the original D3 damping function. The integration grid option was required at ultrafine for all of calculations. All of structures were optimized in gas-phase with thermal calculations and frequency analyses at 353 K. Transition state structures were searched by simply performing a crude relaxed potential energy surface (RPES) scan connecting reactants and products, and then optimized by the rational

function optimization (RFO) method of TS.<sup>8</sup> Imaginary frequencies for all of transition states were verified to be the only one in their vibrations and were confirmed the correctness by viewing the normal mode vector or the intrinsic reaction coordinate (IRC)<sup>9</sup> path calculations. The reported Gibbs free energies were the single point electronic energy in dimethyl sulfoxide (DMSO) with the gas-phase free energy correction. All calculations were performed by the Gaussian 09 package.<sup>10</sup>

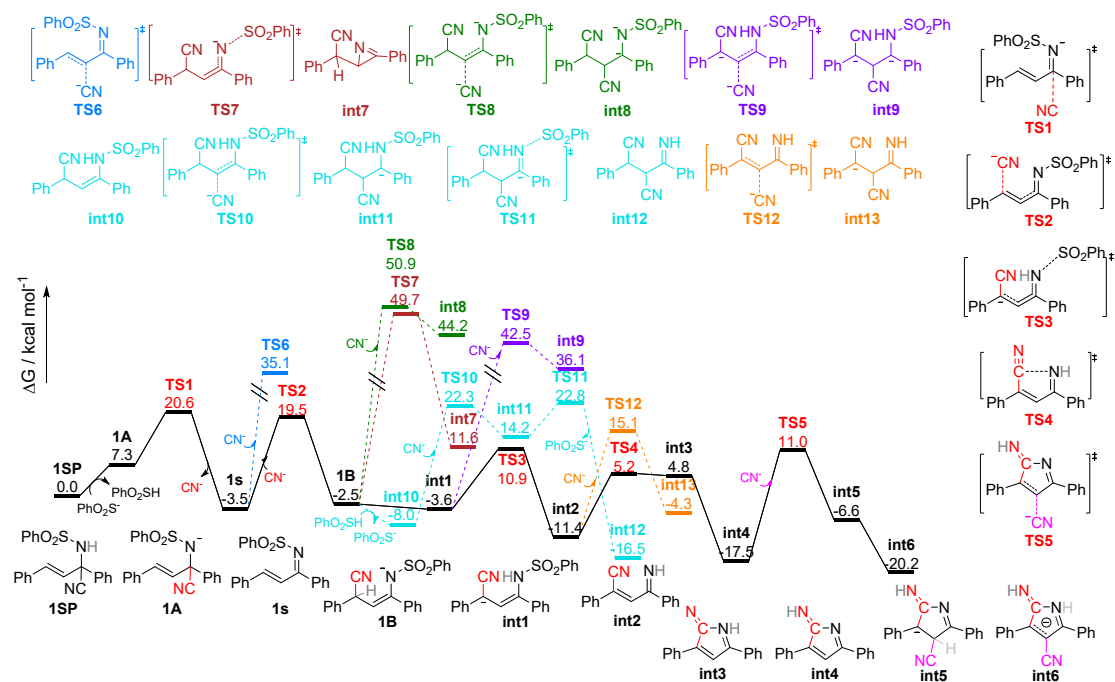

**Figure S1.** Gibbs free energy profile of the reaction pathways including various plausible second CN addition and the cyclization pathway.

# Characterization data for pyrrolo[1,2- $\alpha$ ]pyrimidine

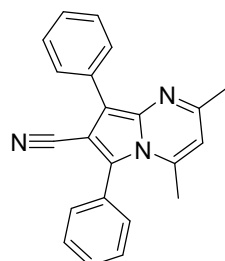

Following the general procedure C, compound **40** was obtained as a green solid (288 mg, 89% yield).  $^1\text{H}$  NMR (400 MHz, Chloroform-*d*)  $\delta$  8.04 (d,  $J = 7.6$  Hz, 2H), 7.57 – 7.41 (m, 7H), 7.32 (t,  $J = 7.4$  Hz, 1H), 6.33 (s, 1H), 2.51 (s, 3H), 2.07 (s, 3H).  $^{13}\text{C}$  NMR (151 MHz, Chloroform-*d*)  $\delta$  155.3, 142.7, 137.7, 132.1, 131.6, 131.1, 129.7, 129.0, 128.9, 128.7, 128.0, 127.0, 116.6, 113.3, 111.7, 100.4, 24.7, 22.0. IR (thin film)  $\nu$  2219, 1627, 1518, 736, 693  $\text{cm}^{-1}$ . HRMS (ESI)  $m/z$  calcd for  $[\text{C}_{22}\text{H}_{17}\text{N}_3\text{Na}]^+$  ( $[\text{M}+\text{Na}]^+$ ): 346.1315, found: 346.1317.

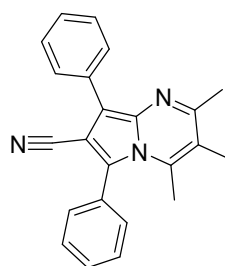

Following the general procedure C, compound **41** was obtained as a green solid (260 mg, 77% yield).  $^1\text{H}$  NMR (400 MHz, Chloroform-*d*)  $\delta$  8.06 (d,  $J = 7.7$  Hz, 2H), 7.51–7.43 (m, 7H), 7.31 (t,  $J = 7.4$  Hz, 1H), 2.54 (s, 3H), 2.20 (s, 3H), 2.09 (s, 3H).  $^{13}\text{C}$  NMR (101 MHz, Chloroform-*d*)  $\delta$  155.6, 139.0, 136.5, 132.2, 131.8, 130.8, 129.2, 128.7, 128.5, 128.1, 126.7, 116.9, 116.8, 113.0, 99.9, 24.4, 18.3, 14.4. IR (thin film)  $\nu$  2218, 1633, 1545, 1511, 697  $\text{cm}^{-1}$ . HRMS (ESI)  $m/z$  calcd for  $[\text{C}_{23}\text{H}_{19}\text{N}_3\text{Na}]^+$  ( $[\text{M}+\text{Na}]^+$ ): 360.1471, found: 360.1471.

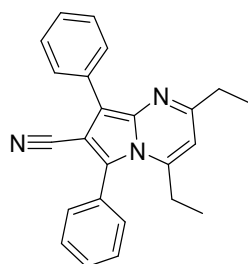

Following the general procedure C, compound **42** was obtained as a green solid (249 mg, 71% yield).  $^1\text{H}$  NMR (400 MHz, Chloroform-*d*)  $\delta$  8.10 (d,  $J = 7.6$  Hz, 2H), 7.54 – 7.42 (m, 7H), 7.31 (t,  $J = 7.4$  Hz, 1H), 6.41 (s, 1H), 2.80 (q,  $J = 7.5$  Hz, 2H), 2.41 (q,  $J = 7.3$  Hz, 2H), 1.35 (t,  $J = 7.5$  Hz, 3H), 1.03 (t,  $J = 7.3$  Hz, 3H).  $^{13}\text{C}$  NMR (101 MHz, Chloroform-*d*)  $\delta$  159.6, 148.3, 137.8, 132.2, 131.4, 131.1, 129.5, 128.8, 128.7, 128.5, 128.0, 126.7, 116.6, 113.3, 107.8, 100.5, 31.2, 26.5, 12.3, 11.2. IR (thin film)  $\nu$  2974, 2217,

1623, 1548, 1515  $\text{cm}^{-1}$ . HRMS (ESI)  $m/z$  calcd for  $[\text{C}_{24}\text{H}_{21}\text{N}_3\text{Na}]^+$  ( $[\text{M}+\text{Na}]^+$ ): 374.1628, found: 374.1628.

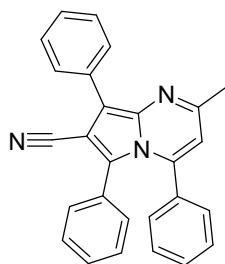

Following the general procedure C, compound **43** was obtained as a yellow solid (380 mg, 85% yield).  $^1\text{H}$  NMR (400 MHz, Chloroform-*d*)  $\delta$  8.08 (d,  $J = 7.4$  Hz, 2H), 7.52 (t,  $J = 7.7$  Hz, 2H), 7.36 (t,  $J = 7.4$  Hz, 1H), 7.18 – 7.11 (m, 1H), 7.10 – 6.94 (m, 9H), 6.53 (s, 1H), 2.60 (s, 3H).  $^{13}\text{C}$  NMR (151 MHz, Chloroform-*d*)  $\delta$  155.1, 144.5, 138.3, 132.6, 131.9, 129.8, 129.5, 129.4, 129.2, 128.9, 128.6, 127.9, 127.9, 127.8, 127.6, 127.1, 116.7, 114.3, 113.1, 100.1, 24.7. IR (thin film)  $\nu$  2222, 1634, 1508, 1492, 695  $\text{cm}^{-1}$ . HRMS (ESI)  $m/z$  calcd for  $[\text{C}_{27}\text{H}_{19}\text{N}_3\text{Na}]^+$  ( $[\text{M}+\text{Na}]^+$ ): 408.1471, found: 408.1469.

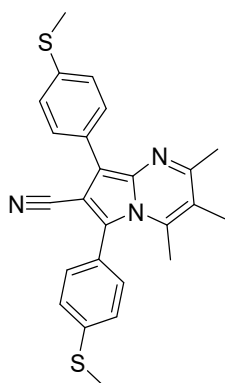

Following the general procedure C, compound **44** was obtained as a green solid (335 mg, 78% yield).  $^1\text{H}$  NMR (400 MHz, Chloroform-*d*)  $\delta$  8.00 (d,  $J = 8.3$  Hz, 2H), 7.37 (d,  $J = 8.5$  Hz, 4H), 7.31 (d,  $J = 8.3$  Hz, 2H), 2.55 (s, 3H), 2.54 (s, 3H), 2.52 (s, 3H), 2.20 (s, 3H), 2.12 (s, 3H).  $^{13}\text{C}$  NMR (151 MHz, Chloroform-*d*)  $\delta$  155.7, 140.5, 139.1, 136.7, 136.6, 131.1, 129.3, 129.0, 128.0, 127.1, 125.4, 117.1, 116.9, 112.6, 99.7, 24.5, 18.5, 16.2, 15.4, 14.5. IR (thin film)  $\nu$  2921, 2222, 1638, 1508, 1431  $\text{cm}^{-1}$ . HRMS (ESI)  $m/z$  calcd for  $[\text{C}_{25}\text{H}_{23}\text{N}_3\text{S}_2\text{Na}]^+$  ( $[\text{M}+\text{Na}]^+$ ): 452.1226, found: 452.1225.

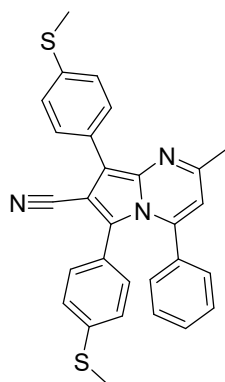

Following the general procedure C, compound **45** was obtained as an orange solid (353 mg, 74% yield).  $^1\text{H}$  NMR (400 MHz, Chloroform-*d*)  $\delta$  8.02 (d,  $J = 8.3$  Hz, 2H), 7.41 (d,  $J = 8.3$  Hz, 2H), 7.20 (t,  $J = 6.8$  Hz, 1H), 7.10 – 6.98 (m, 4H), 6.91–6.84 (m, 4H), 6.52 (s, 1H), 2.59 (s, 3H), 2.54 (s, 3H), 2.41 (s, 3H).

$^{13}\text{C}$  NMR (101 MHz, Chloroform-*d*)  $\delta$  155.0, 144.5, 138.9, 138.2, 137.1, 132.6, 129.6, 129.3, 129.1, 128.8, 128.7, 128.1, 127.8, 127.0, 126.3, 125.5, 116.7, 113.7, 113.1, 99.6, 24.7, 16.0, 15.7. IR (thin film)  $\nu$  29117, 2220, 1618, 1505, 1493  $\text{cm}^{-1}$ . HRMS (ESI)  $m/z$  calcd for  $[\text{C}_{29}\text{H}_{23}\text{N}_3\text{S}_2\text{Na}]^+$  ( $[\text{M}+\text{Na}]^+$ ): 500.1226, found: 500.1225.

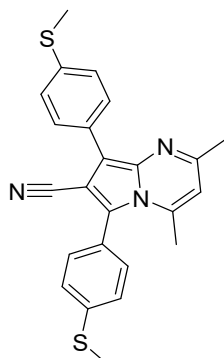

Following the general procedure C, compound **46** was obtained as a green solid (296 mg, 71% yield).  $^1\text{H}$  NMR (400 MHz, Chloroform-*d*)  $\delta$  7.98 (d,  $J = 8.3$  Hz, 2H), 7.43 – 7.35 (m, 4H), 7.31 (d,  $J = 8.2$  Hz, 2H), 6.33 (s, 1H), 2.55 (s, 3H), 2.52 (s, 3H), 2.50 (s, 3H), 2.11 (s, 3H).  $^{13}\text{C}$  NMR (101 MHz, Chloroform-*d*)  $\delta$  155.1, 142.7, 141.0, 137.6, 136.8, 131.6, 129.0, 128.4, 127.1, 127.0, 125.1, 116.5, 112.7, 111.7, 100.2, 24.5, 22.0, 16.1, 15.2. IR (thin film)  $\nu$  2919, 2220, 1629, 1516, 1497  $\text{cm}^{-1}$ . HRMS (ESI)  $m/z$  calcd for  $[\text{C}_{24}\text{H}_{21}\text{N}_3\text{S}_2\text{Na}]^+$  ( $[\text{M}+\text{Na}]^+$ ): 438.1069, found: 438.1070.

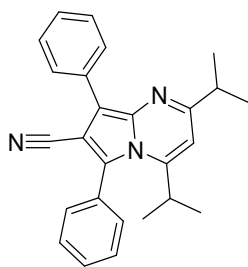

Following the general procedure C, compound **47** was obtained as a green solid (148 mg, 39% yield).  $^1\text{H}$  NMR (400 MHz, Chloroform-*d*)  $\delta$  8.14 (d,  $J = 7.6$  Hz, 2H), 7.53 – 7.41 (m, 7H), 7.30 (t,  $J = 7.4$  Hz, 1H), 6.50 (s, 1H), 3.12 – 2.93 (m, 2H), 1.33 (d,  $J = 6.9$  Hz, 6H), 1.01 (d,  $J = 6.7$  Hz, 6H).  $^{13}\text{C}$  NMR (101 MHz, Chloroform-*d*)  $\delta$  163.3, 153.8, 138.1, 132.3, 131.6, 130.6, 129.5, 128.6, 128.5, 128.4, 128.3, 126.6, 113.3, 104.9, 100.9, 36.2, 28.1, 21.5, 21.1. IR (thin film)  $\nu$  2968, 2929, 2224, 1621, 1515  $\text{cm}^{-1}$ . HRMS (ESI)  $m/z$  calcd for  $[\text{C}_{26}\text{H}_{25}\text{N}_3\text{Na}]^+$  ( $[\text{M}+\text{Na}]^+$ ): 402.1941, found: 402.1940.

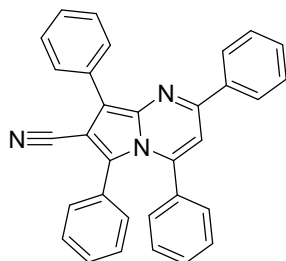

Following the general procedure C, compound **48** was obtained as a red solid (240 mg, 54% yield).  $^1\text{H}$  NMR (400 MHz, Chloroform-*d*)  $\delta$  8.27 – 8.11 (m, 4H), 7.57 (t,  $J = 7.7$  Hz, 2H), 7.53 – 7.44 (m, 3H), 7.40 (t,  $J = 7.4$  Hz, 1H), 7.21 – 6.99 (m, 11H).  $^{13}\text{C}$  NMR (151 MHz, Chloroform-*d*)  $\delta$  151.7, 145.1, 138.5, 136.9, 133.0, 132.0, 130.2, 129.7, 129.6, 129.5, 129.0, 128.9, 128.6, 128.1, 127.9, 127.6, 127.1, 126.9, 116.6, 116.0, 109.4, 100.7. IR (thin film)  $\nu$  3059, 2224, 1613, 1547, 1493  $\text{cm}^{-1}$ . HRMS (ESI)  $m/z$  calcd

for  $[C_{27}H_{19}N_3Na]^+$  ( $[M+Na]^+$ ): 470.1628, found: 470.1628.

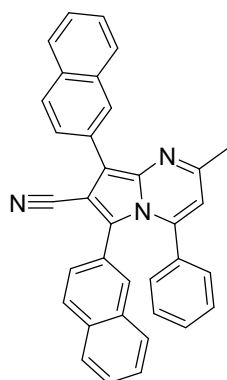

Following the general procedure C, compound **49** was obtained as an orange solid (388 mg, 80% yield).  $^1H$  NMR (400 MHz, Chloroform-*d*)  $\delta$  8.55 (s, 1H), 8.30 (dd,  $J = 8.5, 1.6$  Hz, 1H), 7.98 (t,  $J = 7.9$  Hz, 2H), 7.91 – 7.86 (m, 1H), 7.72 – 7.62 (m, 2H), 7.60 (s, 1H), 7.54 – 7.40 (m, 5H), 7.14 – 7.02 (m, 3H), 6.97 – 6.68 (m, 3H), 6.58 (s, 1H), 2.64 (s, 3H).  $^{13}C$  NMR (151 MHz, Chloroform-*d*)  $\delta$  155.3, 144.7, 138.7, 133.7, 132.6, 132.4, 132.3, 129.5, 129.4, 129.3, 129.2, 128.4, 128.1, 128.1, 128.0, 127.7, 127.6, 127.5, 127.2, 127.1, 126.6, 126.4, 126.2, 126.0, 125.8, 116.8, 114.4, 113.2, 100.5, 24.8. IR (thin film)  $\nu$  2222, 1631, 1511, 1488, 697  $cm^{-1}$ . HRMS (ESI)  $m/z$  calcd for  $[C_{35}H_{23}N_3Na]^+$  ( $[M+Na]^+$ ): 508.1784, found: 508.1783.

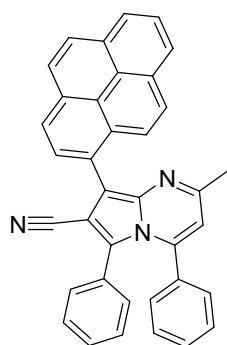

Following the general procedure C, compound **50** was obtained as a orange solid (290 mg, 57% yield).  $^1H$  NMR (400 MHz, Chloroform-*d*)  $\delta$  8.35 – 8.26 (m, 2H), 8.24 – 8.16 (m, 3H), 8.16 – 8.10 (m, 2H), 8.10 – 8.06 (m, 1H), 8.01 (t,  $J = 7.6$  Hz, 1H), 7.22 – 6.98 (m, 10H), 6.60 (s, 1H), 2.50 (s, 3H).  $^{13}C$  NMR (151 MHz, Chloroform-*d*)  $\delta$  155.4, 144.6, 139.1, 132.7, 131.4, 131.2, 131.2, 129.9, 129.5, 129.0, 128.1, 127.9, 127.9, 127.7, 127.6, 127.5, 127.2, 126.8, 126.1, 125.8, 125.3, 125.0, 125.0, 124.9, 124.9, 116.2, 114.5, 113.2, 103.0, 24.7. IR (thin film)  $\nu$  2921, 2225, 1633, 1512, 1489  $cm^{-1}$ . HRMS (ESI)  $m/z$  calcd for  $[C_{37}H_{23}N_3Na]^+$  ( $[M+Na]^+$ ): 532.1784, found: 532.1784.

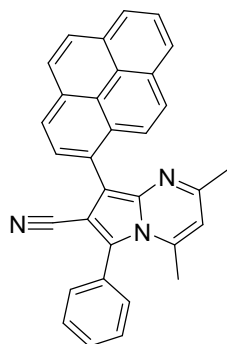

Following the general procedure C, compound **51** was obtained as a yellow solid (371 mg, 83% yield). <sup>1</sup>H NMR (400 MHz, Chloroform-*d*) δ 8.31 – 8.27 (m, 1H), 8.25 – 8.21 (m, 1H), 8.20 – 8.09 (m, 5H), 8.06 – 8.03 (m, 1H), 7.99 (t, *J* = 7.6 Hz, 1H), 7.63 (d, *J* = 6.2 Hz, 1H), 7.58 – 7.46 (m, 4H), 6.36 (s, 1H), 2.38 (s, 3H), 2.14 (s, 3H). <sup>13</sup>C NMR (151 MHz, Chloroform-*d*) δ 155.5, 142.8, 138.4, 131.5, 131.5, 131.4, 131.1, 131.0, 129.8, 129.6, 129.4, 128.7, 128.0, 128.0, 127.5, 127.1, 126.9, 126.1, 125.8, 125.3, 125.0, 124.9, 124.9, 116.0, 113.3, 111.7, 103.2, 24.5, 21.9. IR (thin film) ν 3049, 2927, 1627, 1601, 1585 cm<sup>-1</sup>. HRMS (ESI) *m/z* calcd for [C<sub>32</sub>H<sub>21</sub>N<sub>3</sub>Na]<sup>+</sup> ([M+Na]<sup>+</sup>): 470.1628, found: 470.1628.

# Supplementary figure of pyrrolo[1,2-*a*]pyrimidine

## UV spectrum and PL spectra of pyrrolo[1,2-*a*]pyrimidine

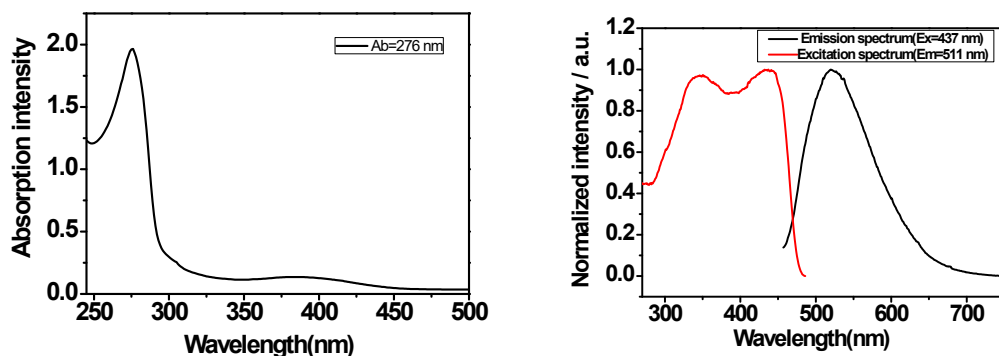

Figure S2. UV spectrum of **40** in THF solution (0.001 mg/mL) and PL spectra of **40** in THF solution (0.1 mg/mL).

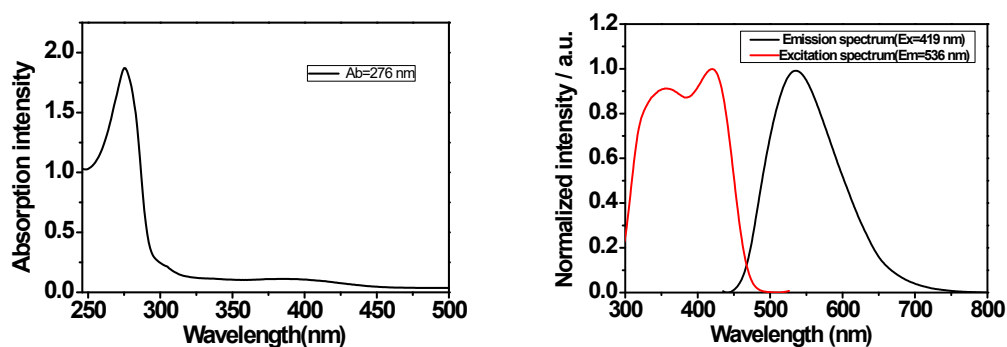

Figure S3. UV spectrum of **41** in THF solution (0.001 mg/mL) and PL spectra of **41** in THF solution (0.1 mg/mL).

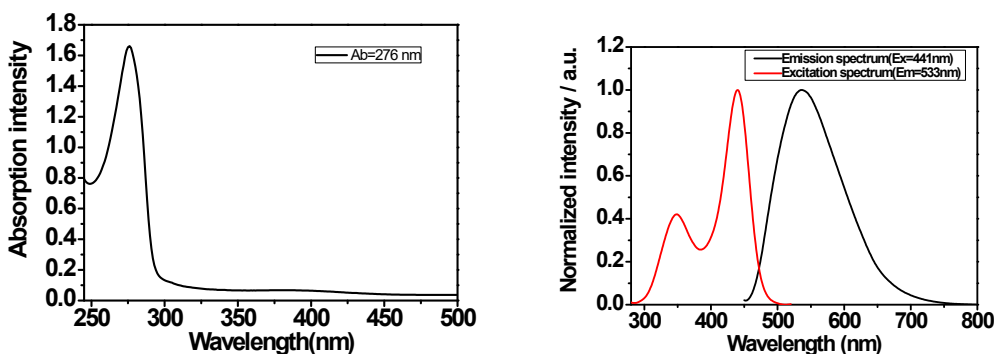

Figure S4. UV spectrum of **42** in THF solution (0.001 mg/mL) and PL spectra of **42** in THF solution (0.1 mg/mL).



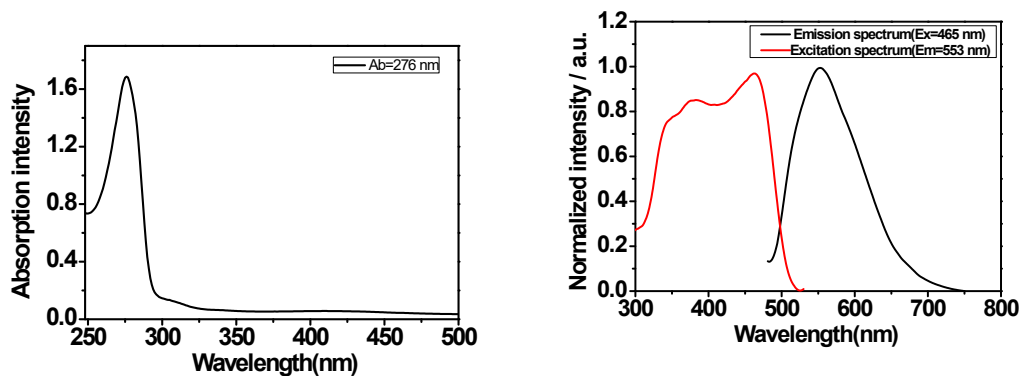

Figure S5. UV spectrum of **43** in THF solution (0.001 mg/mL) and PL spectra of **43** in THF solution (0.1 mg/mL).

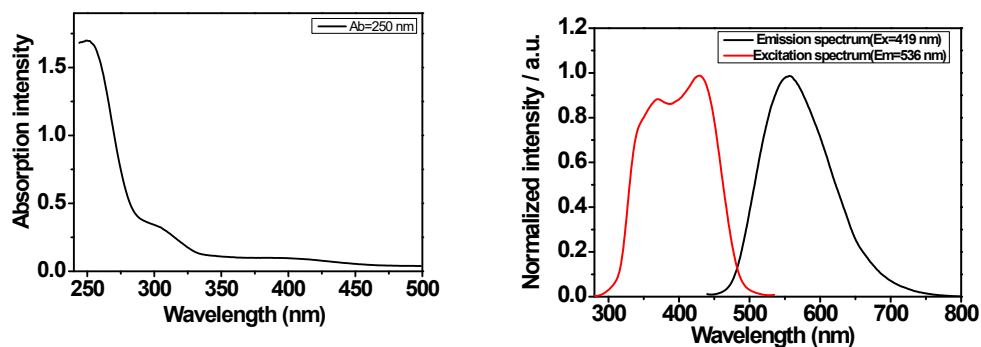

Figure S6. UV spectrum of **44** in THF solution (0.001 mg/mL) and PL spectra of **44** in THF solution (0.1 mg/mL).

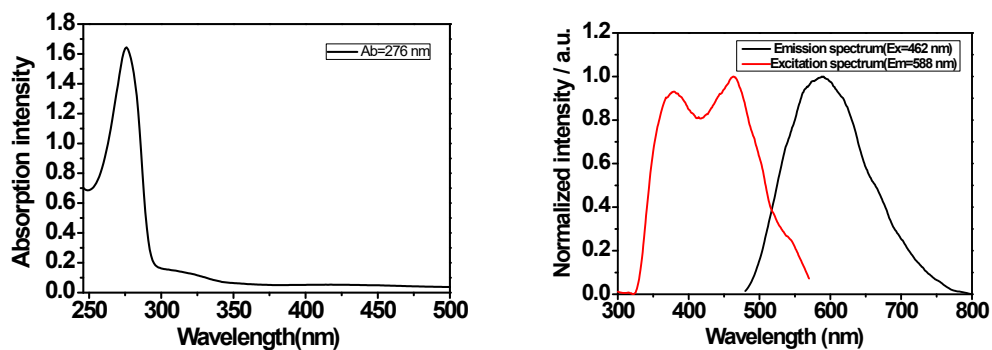

Figure S7. UV spectrum of **45** in THF solution (0.001 mg/mL) and PL spectra of **45** in THF solution (0.1 mg/mL).

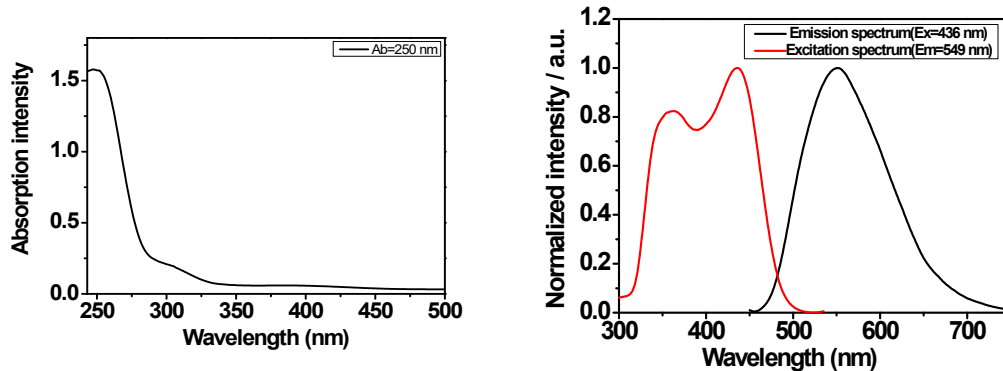

Figure S8. UV spectrum of **46** in THF solution (0.001 mg/mL) and PL spectra of **46** in THF solution (0.1 mg/mL).

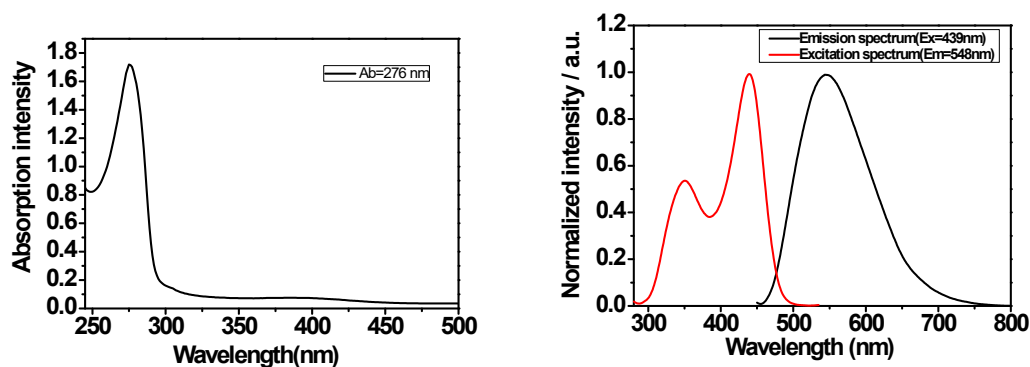

Figure S9. UV spectrum of **47** in THF solution (0.001 mg/mL) and PL spectra of **47** in THF solution (0.1 mg/mL).

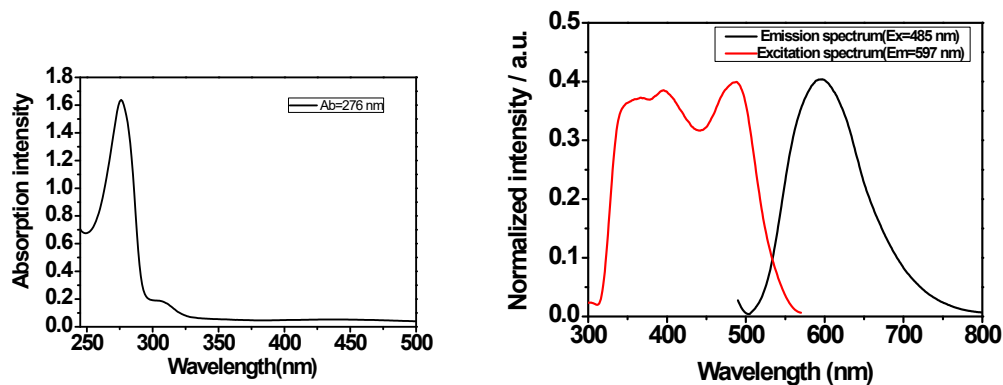

Figure S10. UV spectrum of **48** in THF solution (0.001 mg/mL) and PL spectra of **48** in THF solution (0.1 mg/mL).

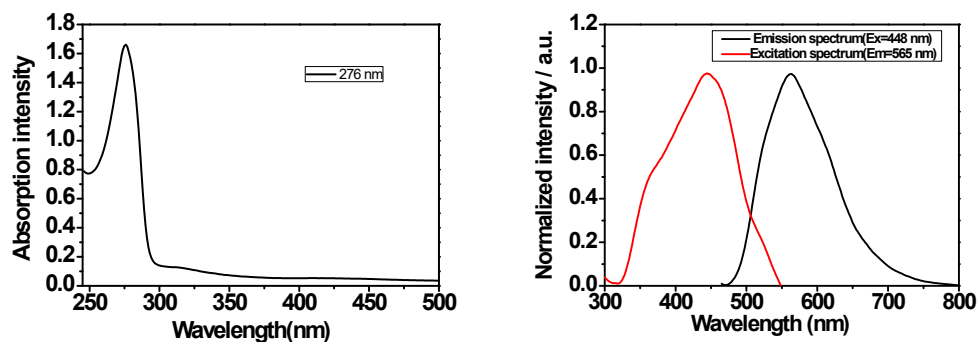

**Figure S11.** UV spectrum of **49** in THF solution (0.001 mg/mL) and PL spectra of **49** in THF solution (0.1 mg/mL).

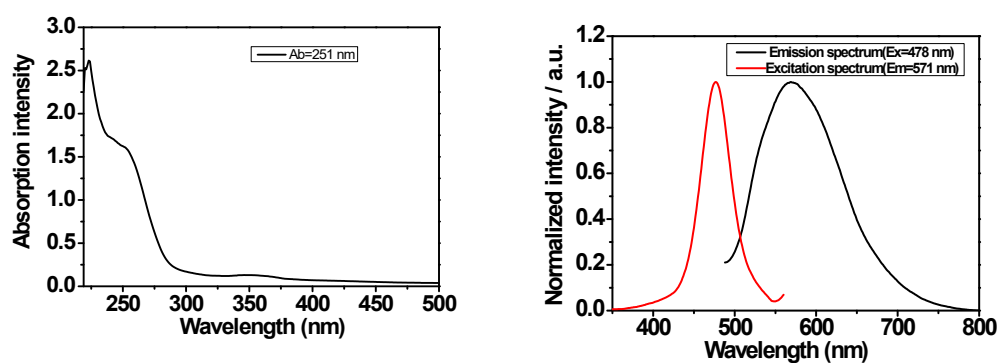

**Figure S12.** UV spectrum of **50** in THF solution (0.001 mg/mL) and PL spectra of **50** in THF solution (0.1 mg/mL).

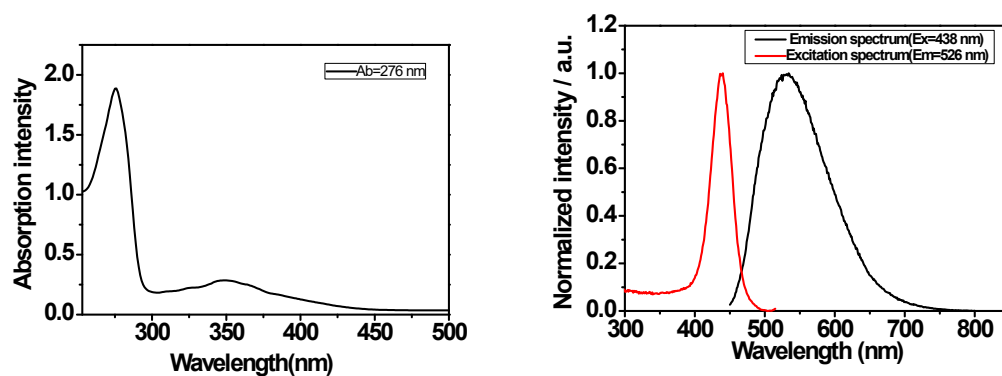

**Figure S13.** UV spectrum of **51** in THF solution (0.001 mg/mL) and PL spectra of **51** in THF solution (0.1 mg/mL).

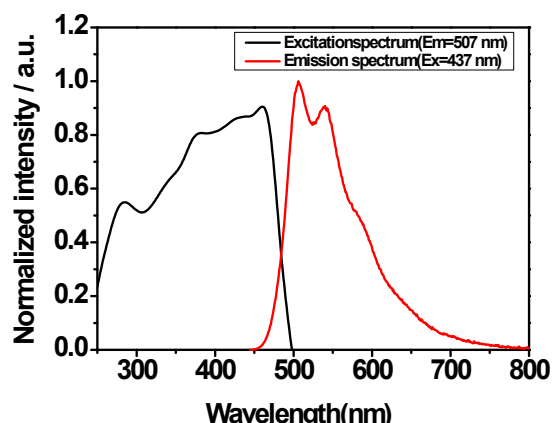

Figure S14. Excitation and emission spectra of **40** powder.

## Emission spectra of pyrrolo[1,2-*a*]pyrimidine in THF and water mixtures

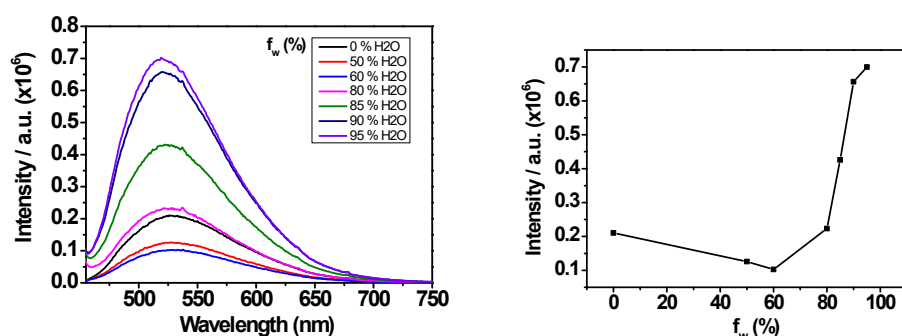

Figure S15. Emission spectra of **40** in THF and water mixtures (0.1 mg/mL) at different  $f_w$ ,  $\lambda_{ex}$  =437 nm. The emission intensity at 518 nm with different  $f_w$ .

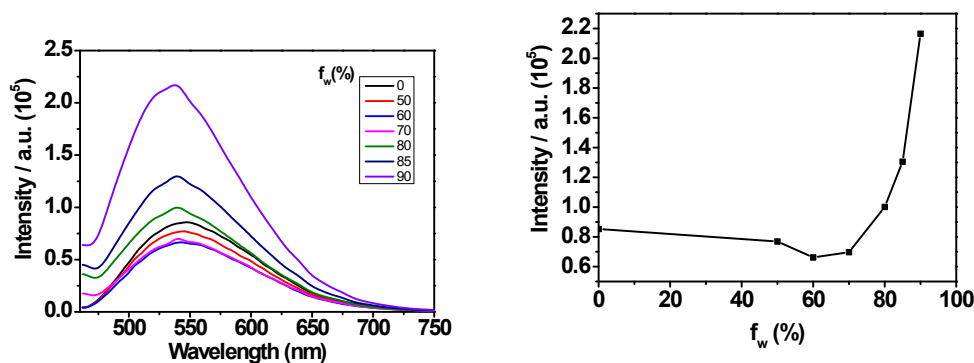

Figure S16. Emission spectra of **47** in THF and water mixtures (0.1 mg/mL) at different  $f_w$ ,  $\lambda_{ex}$  =439 nm. The emission intensity at 538 nm with different  $f_w$ .

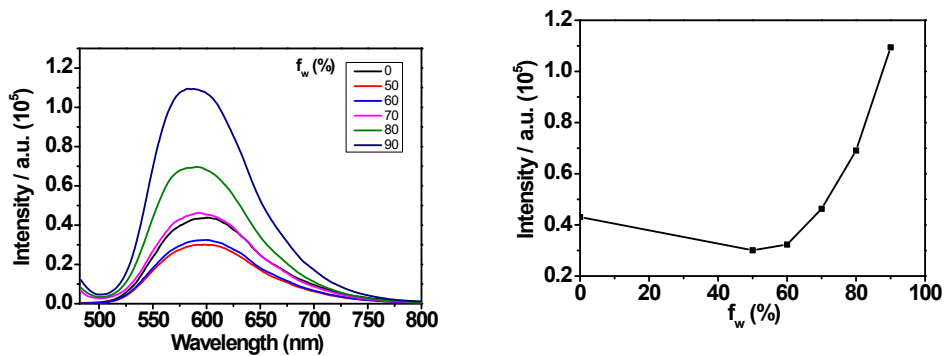

**Figure S17.** Emission spectra of **48** in THF and water mixtures (0.1 mg/mL) at different  $f_w$ ,  $\lambda_{ex}$  =485 nm. The emission intensity at 588 nm with different  $f_w$ .

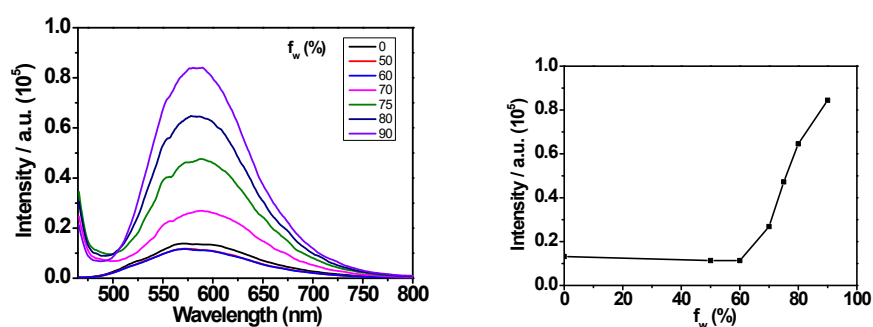

**Figure S18.** Emission spectra of **49** in THF and water mixtures (0.1 mg/mL) at different  $f_w$ ,  $\lambda_{ex}$  =448 nm.

The emission intensity at 585 nm with different  $f_w$ .

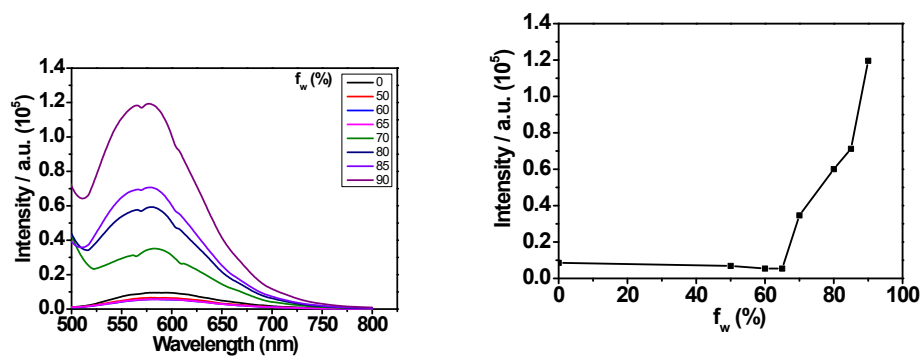

**Figure S19.** Emission spectra of **50** in THF and water mixtures (0.1 mg/mL) at different  $f_w$ ,  $\lambda_{ex}$  =478 nm.

The emission intensity at 578 nm with different  $f_w$ .

## Time-dependent emission enhancement after different scan times

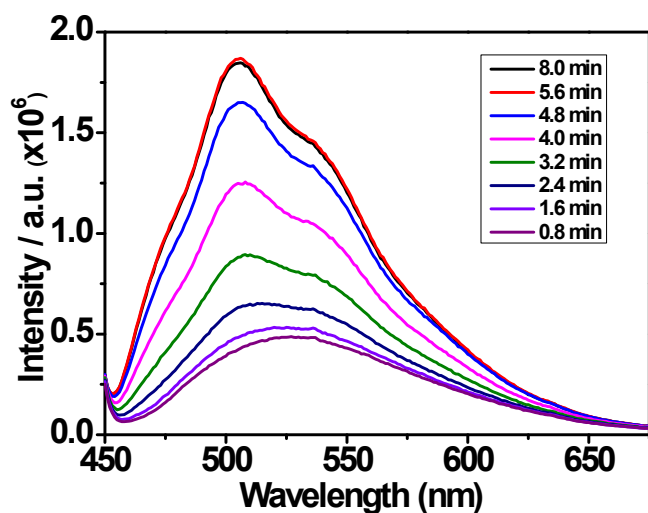

Figure S20. PL spectra of **41** in 10% THF and 90% water mixtures (0.2 mg/mL) after different scan times ranging from 0 to 8 min under ambient conditions,  $\lambda_{\text{ex}} = 419$  nm.

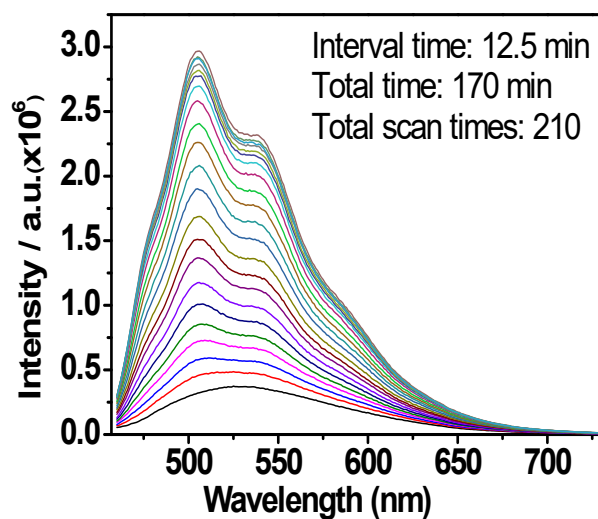

Figure S21. PL spectra of **42** in 10% THF and 90% water mixtures (0.2 mg/mL) after different scan times ranging from 0 to 170 min under ambient conditions,  $\lambda_{\text{ex}} = 441$  nm.

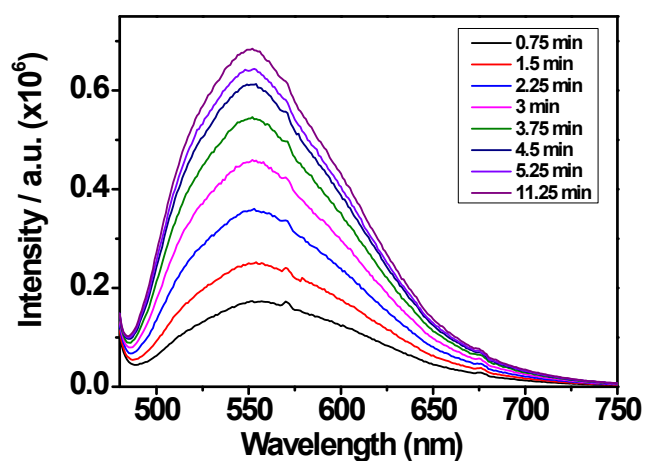

Figure S22. PL spectra of **43** in 10% THF and 90% water mixtures (0.2 mg/mL) after different scan times ranging from 0 to 11.3 min under ambient conditions,  $\lambda_{\text{ex}} = 465$  nm.

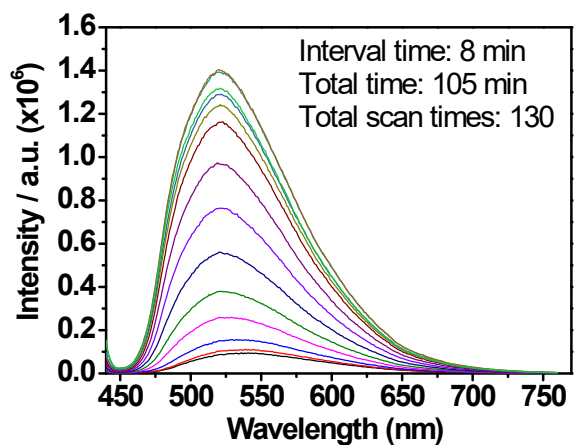

Figure S23. PL spectra of **44** in 10% THF and 90% water mixtures (0.2 mg/mL) after different scan times ranging from 0 to 105 min under ambient conditions,  $\lambda_{\text{ex}} = 428$  nm.

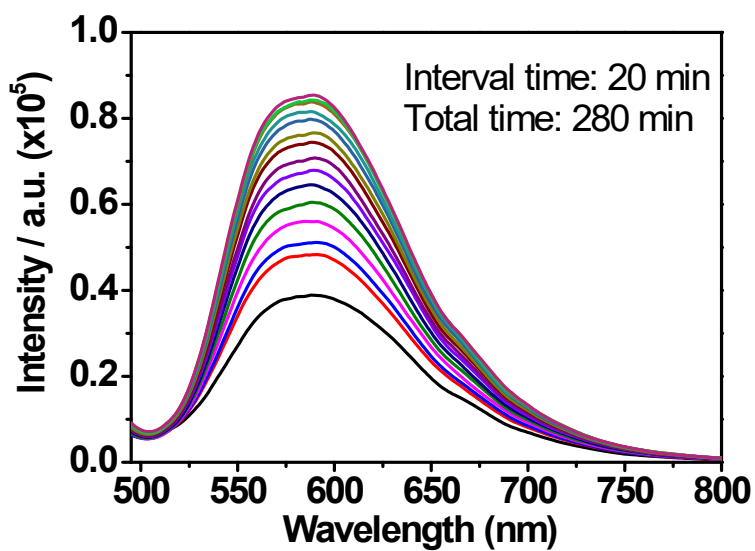

Figure S24. PL spectra of **45** in 10% THF and 90% water mixtures (0.2 mg/mL) after different scan times ranging from 0 to 280 min under ambient conditions,  $\lambda_{\text{ex}} = 462$  nm.

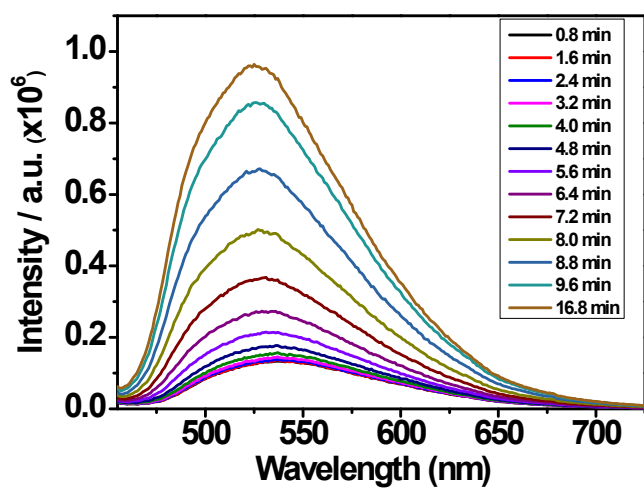

Figure S25. PL spectra of **46** in 10% THF and 90% water mixtures (0.2 mg/mL) after different scan times ranging from 0 to 16.8 min under ambient conditions,  $\lambda_{\text{ex}} = 436$  nm.



## Crystal packing of pyrrolo[1,2-*a*]pyrimidine

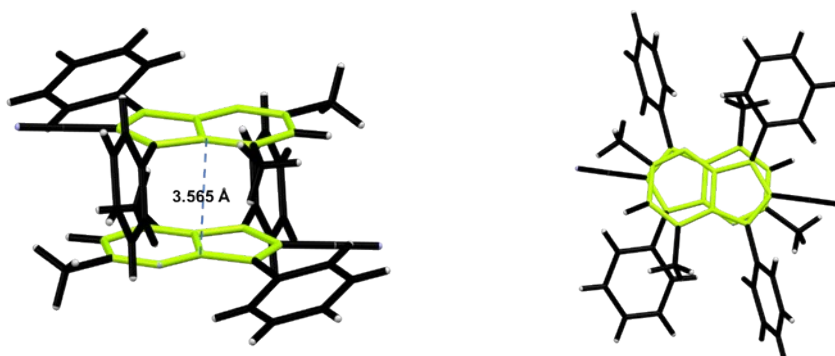

Figure S26. Single-crystal structure and molecular packing of **40**.

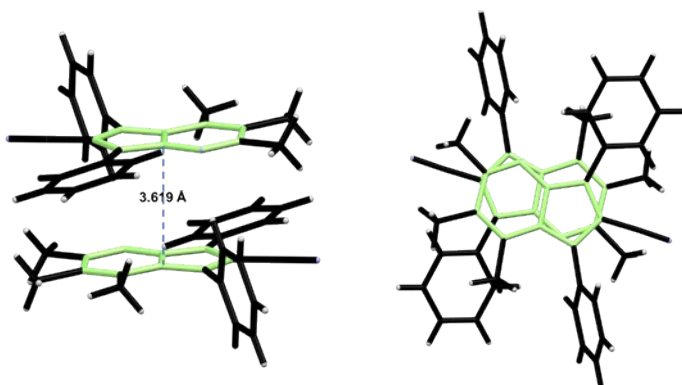

Figure S27. Single-crystal structure and molecular packing of **41**.

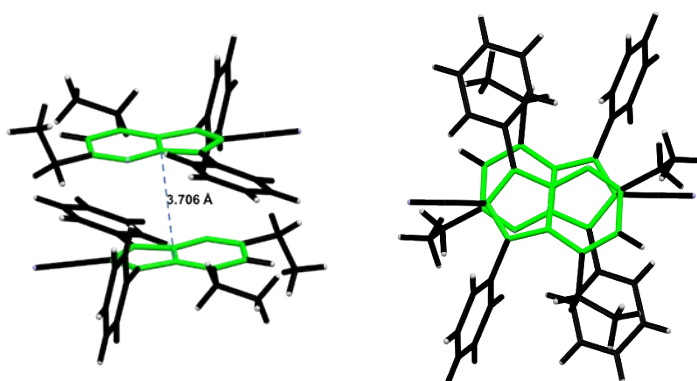

Figure S28. Single-crystal structure and molecular packing of **42**.

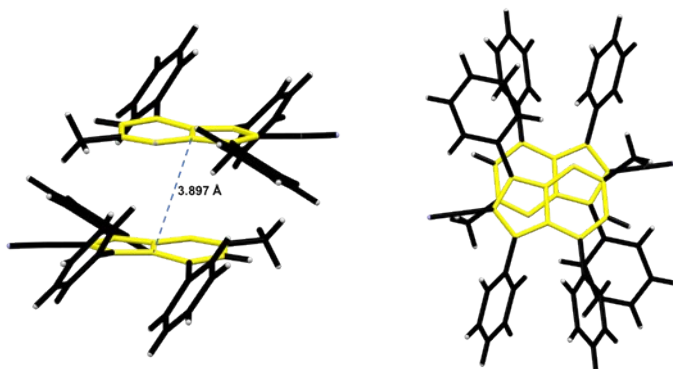

**Figure S29.** Single-crystal structure and molecular packing of **43**.

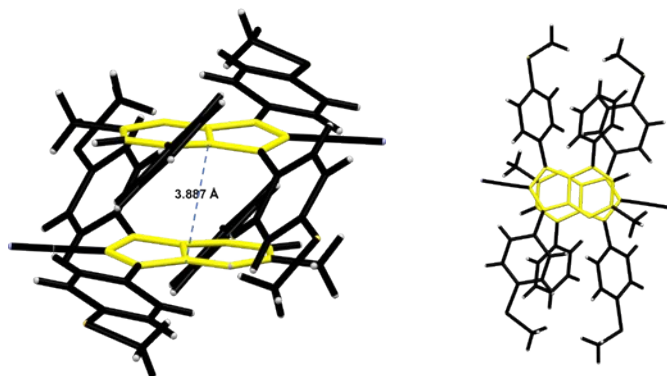

**Figure S30.** Single-crystal structure and molecular packing of **45**.

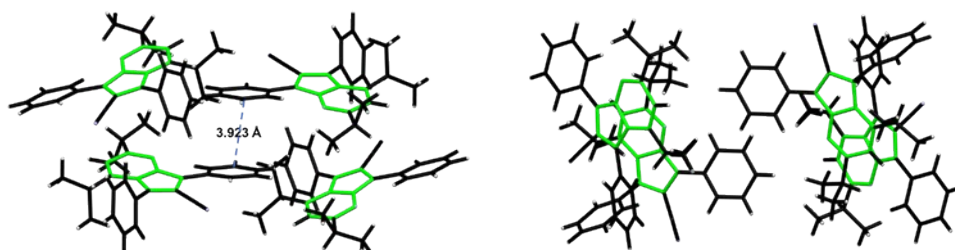

**Figure S31.** Single-crystal structure and molecular packing of **47**.

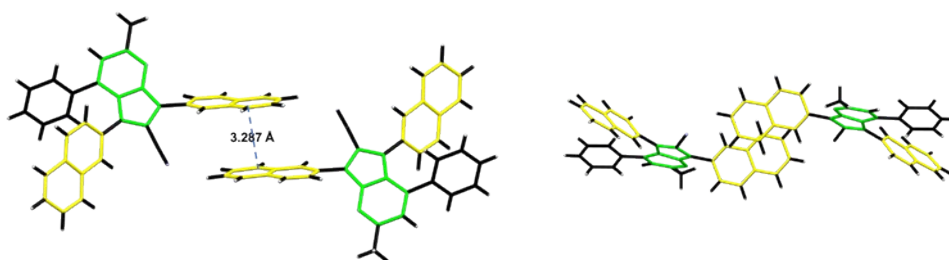

**Figure S32.** Single-crystal structure and molecular packing of **49**.

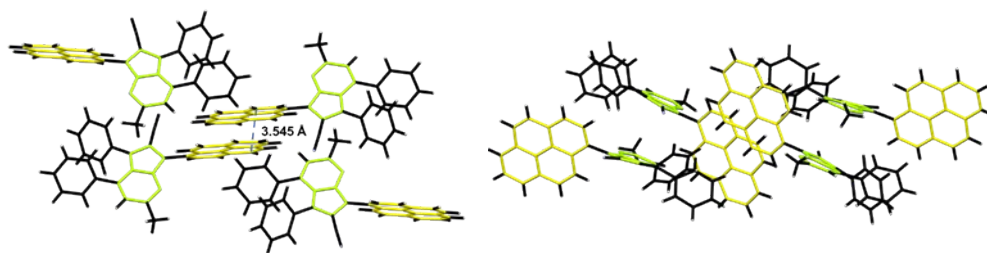

**Figure S33.** Single-crystal structure and molecular packing of **50**.

## Single crystal data

X-ray diffractions for single crystals of **2**, **40**, **41**, **42**, **43**, **45**, **47**, **49** and **50** were carried out on Rigaku Synergy Custom (Liquid MetalJet D2 Plus) diffractometer using Ga K $\alpha$  radiation ( $\lambda = 1.3405 \text{ \AA}$ ). Data collection and unit cell refinement were executed by using CrysAlisPro software. Data processing and absorption correction, giving minimum and maximum transmission factors, were accomplished with CrysAlisPro. The structure was solved with the SHELXT and refined with the SHELXL using least-squares minimisation. All non-hydrogen atoms were refined with anisotropic displacement parameters. All carbon bound hydrogen atom positions were determined by geometry and refined by a riding model. Crystal data and structure refinements of **2**, **40**, **41**, **42**, **43**, **45**, **47**, **49** and **50** are listed in **Table S1**, **Table S2**, **Table S3**, **Table S4**, **Table S5**, **Table S6**, **Table S7**, **Table S8** and **Table S9**. This data can be obtained free of charge from the Cambridge Crystallographic Data Centre via <https://www.ccdc.cam.ac.uk/>

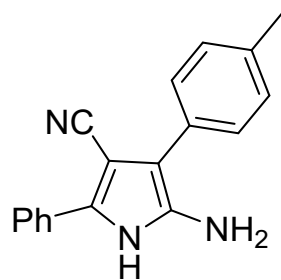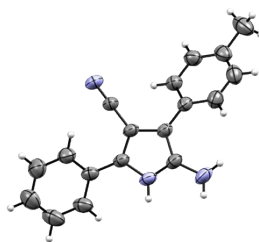

CCDC 2133476

**Table S1.** Crystal data and structure refinement for **2**.

|                                                  |                                                            |                     |
|--------------------------------------------------|------------------------------------------------------------|---------------------|
| Identification code                              | <b>2</b>                                                   |                     |
| Empirical formula                                | $C_{18}H_{15}N_3$                                          |                     |
| Formula weight                                   | 273.33                                                     |                     |
| Temperature (K)                                  | 293(2)                                                     |                     |
| Wavelength (Å)                                   | 1.3405                                                     |                     |
| Crystal system                                   | monoclinic                                                 |                     |
| Space group                                      | $P2_1/c$                                                   |                     |
| Unit cell dimensions (Å, °)                      | $a = 13.5606(15)$                                          | $\alpha = 90$       |
|                                                  | $b = 14.1429(16)$                                          | $\beta = 93.620(9)$ |
|                                                  | $c = 7.6056(7)$                                            | $\gamma = 90$       |
| Volume (Å <sup>3</sup> )                         | 1455.7(3)                                                  |                     |
| Z                                                | 4                                                          |                     |
| Calculated density (g cm <sup>-3</sup> )         | 1.247                                                      |                     |
| Absorption coefficient (mm <sup>-1</sup> )       | 0.375                                                      |                     |
| $F_{000}$                                        | 576                                                        |                     |
| Crystal size (mm <sup>3</sup> )                  | 0.23 × 0.20 × 0.06                                         |                     |
| θ range for data collection (°)                  | 3.931 to 61.207                                            |                     |
| Miller index ranges                              | $-17 \leq h \leq 17, -12 \leq k \leq 18, -9 \leq l \leq 9$ |                     |
| Reflections collected                            | 10673                                                      |                     |
| Independent reflections                          | 3239 [ $R_{int} = 0.0262$ ]                                |                     |
| Completeness to $\theta_{max}$ (%)               | 0.956                                                      |                     |
| Max. and min. transmission                       | 0.65015 and 1.00000                                        |                     |
| Refinement method                                | Full-matrix least-squares on $F^2$                         |                     |
| Data / restraints / parameters                   | 3239 / 0 / 200                                             |                     |
| Goodness-of-fit on $F^2$                         | 1.128                                                      |                     |
| Final R indices [ $I > 2\sigma(I)$ ]             | $R1 = 0.0458, wR2 = 0.1241$                                |                     |
| R indices (all data)                             | $R1 = 0.0671, wR2 = 0.1545$                                |                     |
| Extinction coefficient                           | 0.014(2)                                                   |                     |
| Largest diff. peak and hole (e Å <sup>-3</sup> ) | 0.169 and -0.191                                           |                     |

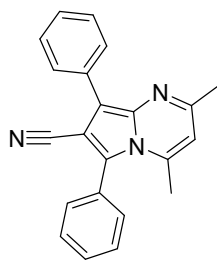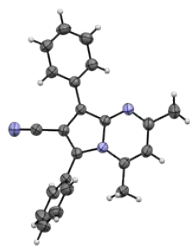

CCDC 2144279

**Table S2.** Crystal data and structure refinement for **40**.

|                                                              |                                                             |                       |
|--------------------------------------------------------------|-------------------------------------------------------------|-----------------------|
| Identification code                                          | <b>40</b>                                                   |                       |
| Empirical formula                                            | C <sub>22</sub> H <sub>17</sub> N <sub>3</sub>              |                       |
| Formula weight                                               | 323.38                                                      |                       |
| Temperature (K)                                              | 293(2)                                                      |                       |
| Wavelength (Å)                                               | 1.3405                                                      |                       |
| Crystal system                                               | triclinic                                                   |                       |
| Space group                                                  | <i>P</i> -1                                                 |                       |
| Unit cell dimensions (Å, °)                                  | <i>a</i> = 7.5636(2)                                        | $\alpha$ = 104.037(2) |
|                                                              | <i>b</i> = 10.6070(3)                                       | $\beta$ = 99.019(2)   |
|                                                              | <i>c</i> = 11.4880(3)                                       | $\gamma$ = 104.020(3) |
| Volume (Å <sup>3</sup> )                                     | 844.44(4)                                                   |                       |
| <i>Z</i>                                                     | 2                                                           |                       |
| Calculated density (g cm <sup>-3</sup> )                     | 1.272                                                       |                       |
| Absorption coefficient (mm <sup>-1</sup> )                   | 0.378                                                       |                       |
| <i>F</i> <sub>000</sub>                                      | 340                                                         |                       |
| Crystal size (mm <sup>3</sup> )                              | 0.18 × 0.16 × 0.05                                          |                       |
| $\theta$ range for data collection (°)                       | 5.653 to 60.617                                             |                       |
| Miller index ranges                                          | -9 ≤ <i>h</i> ≤ 9, -13 ≤ <i>k</i> ≤ 13, -10 ≤ <i>l</i> ≤ 14 |                       |
| Reflections collected                                        | 10297                                                       |                       |
| Independent reflections                                      | 3772 [ <i>R</i> <sub>int</sub> = 0.0226]                    |                       |
| Completeness to $\theta_{\max}$ (%)                          | 0.970                                                       |                       |
| Max. and min. transmission                                   | 0.74060 and 1.00000                                         |                       |
| Refinement method                                            | Full-matrix least-squares on <i>F</i> <sup>2</sup>          |                       |
| Data / restraints / parameters                               | 3772 / 0 / 229                                              |                       |
| Goodness-of-fit on <i>F</i> <sup>2</sup>                     | 1.048                                                       |                       |
| Final <i>R</i> indices [ <i>I</i> > 2 $\sigma$ ( <i>I</i> )] | <i>R</i> 1 = 0.0415, <i>wR</i> 2 = 0.1057                   |                       |
| <i>R</i> indices (all data)                                  | <i>R</i> 1 = 0.0503, <i>wR</i> 2 = 0.1110                   |                       |
| Extinction coefficient                                       | 0.032(3)                                                    |                       |
| Largest diff. peak and hole (e Å <sup>-3</sup> )             | 0.211 and -0.143                                            |                       |

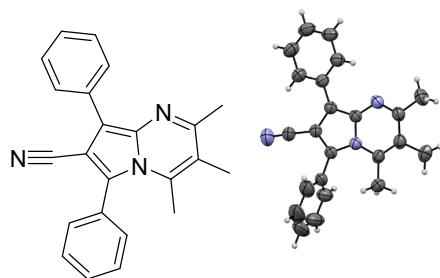

CCDC 2144280

**Table S3.** Crystal data and structure refinement for **41**.

|                                                              |                                                             |                       |
|--------------------------------------------------------------|-------------------------------------------------------------|-----------------------|
| Identification code                                          | <b>41</b>                                                   |                       |
| Empirical formula                                            | C <sub>23</sub> H <sub>19</sub> N <sub>3</sub>              |                       |
| Formula weight                                               | 337.41                                                      |                       |
| Temperature (K)                                              | 293(2)                                                      |                       |
| Wavelength (Å)                                               | 1.3405                                                      |                       |
| Crystal system                                               | triclinic                                                   |                       |
| Space group                                                  | <i>P</i> -1                                                 |                       |
| Unit cell dimensions (Å, °)                                  | <i>a</i> = 7.4368(5)                                        | $\alpha$ = 107.748(4) |
|                                                              | <i>b</i> = 11.5205(6)                                       | $\beta$ = 101.471(5)  |
|                                                              | <i>c</i> = 11.7843(5)                                       | $\gamma$ = 103.216(6) |
| Volume (Å <sup>3</sup> )                                     | 895.98(9)                                                   |                       |
| <i>Z</i>                                                     | 2                                                           |                       |
| Calculated density (g cm <sup>-3</sup> )                     | 1.251                                                       |                       |
| Absorption coefficient (mm <sup>-1</sup> )                   | 0.369                                                       |                       |
| <i>F</i> <sub>000</sub>                                      | 356                                                         |                       |
| Crystal size (mm <sup>3</sup> )                              | 0.20 × 0.18 × 0.06                                          |                       |
| $\theta$ range for data collection (°)                       | 3.577 to 61.476                                             |                       |
| Miller index ranges                                          | -9 ≤ <i>h</i> ≤ 7, -14 ≤ <i>k</i> ≤ 14, -15 ≤ <i>l</i> ≤ 15 |                       |
| Reflections collected                                        | 11963                                                       |                       |
| Independent reflections                                      | 4000 [ <i>R</i> <sub>int</sub> = 0.0321]                    |                       |
| Completeness to $\theta_{\max}$ (%)                          | 0.947                                                       |                       |
| Max. and min. transmission                                   | 0.86643 and 1.00000                                         |                       |
| Refinement method                                            | Full-matrix least-squares on <i>F</i> <sup>2</sup>          |                       |
| Data / restraints / parameters                               | 4000 / 0 / 239                                              |                       |
| Goodness-of-fit on <i>F</i> <sup>2</sup>                     | 1.115                                                       |                       |
| Final <i>R</i> indices [ <i>I</i> > 2 $\sigma$ ( <i>I</i> )] | <i>R</i> 1 = 0.0484, <i>wR</i> 2 = 0.1389                   |                       |
| <i>R</i> indices (all data)                                  | <i>R</i> 1 = 0.0675, <i>wR</i> 2 = 0.1573                   |                       |
| Extinction coefficient                                       | 0.0076(17)                                                  |                       |
| Largest diff. peak and hole (e Å <sup>-3</sup> )             | 0.186 and -0.217                                            |                       |

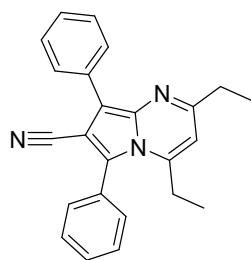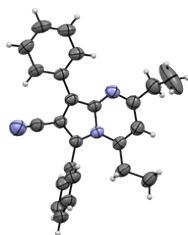

**CCDC 2144282**

**Table S4.** Crystal data and structure refinement for **42**.

|                                                              |                                                               |                       |
|--------------------------------------------------------------|---------------------------------------------------------------|-----------------------|
| Identification code                                          | <b>42</b>                                                     |                       |
| Empirical formula                                            | C <sub>24</sub> H <sub>21</sub> N <sub>3</sub>                |                       |
| Formula weight                                               | 351.44                                                        |                       |
| Temperature (K)                                              | 293(2)                                                        |                       |
| Wavelength (Å)                                               | 1.3405                                                        |                       |
| Crystal system                                               | monoclinic                                                    |                       |
| Space group                                                  | <i>P</i> 2 <sub>1</sub> / <i>c</i>                            |                       |
| Unit cell dimensions (Å, °)                                  | <i>a</i> = 10.9544(12)                                        | $\alpha$ = 90         |
|                                                              | <i>b</i> = 15.4590(15)                                        | $\beta$ = 113.683(12) |
|                                                              | <i>c</i> = 12.2647(13)                                        | $\gamma$ = 90         |
| Volume (Å <sup>3</sup> )                                     | 1902.0(4)                                                     |                       |
| <i>Z</i>                                                     | 4                                                             |                       |
| Calculated density (g cm <sup>-3</sup> )                     | 1.227                                                         |                       |
| Absorption coefficient (mm <sup>-1</sup> )                   | 0.360                                                         |                       |
| <i>F</i> <sub>000</sub>                                      | 744                                                           |                       |
| Crystal size (mm <sup>3</sup> )                              | 0.18 × 0.15 × 0.14                                            |                       |
| $\theta$ range for data collection (°)                       | 4.230 to 60.800                                               |                       |
| Miller index ranges                                          | -14 ≤ <i>h</i> ≤ 13, -19 ≤ <i>k</i> ≤ 19, -15 ≤ <i>l</i> ≤ 15 |                       |
| Reflections collected                                        | 14592                                                         |                       |
| Independent reflections                                      | 4270 [ <i>R</i> <sub>int</sub> = 0.0534]                      |                       |
| Completeness to $\theta_{\max}$ (%)                          | 0.971                                                         |                       |
| Max. and min. transmission                                   | 0.84312 and 1.00000                                           |                       |
| Refinement method                                            | Full-matrix least-squares on <i>F</i> <sup>2</sup>            |                       |
| Data / restraints / parameters                               | 4270 / 0 / 247                                                |                       |
| Goodness-of-fit on <i>F</i> <sup>2</sup>                     | 1.377                                                         |                       |
| Final <i>R</i> indices [ <i>I</i> > 2 $\sigma$ ( <i>I</i> )] | <i>R</i> 1 = 0.0802, <i>wR</i> 2 = 0.2643                     |                       |
| <i>R</i> indices (all data)                                  | <i>R</i> 1 = 0.1215, <i>wR</i> 2 = 0.3583                     |                       |
| Extinction coefficient                                       | 0.015(5)                                                      |                       |
| Largest diff. peak and hole (e Å <sup>-3</sup> )             | 0.344 and -0.479                                              |                       |



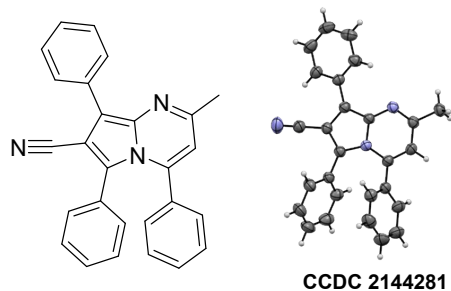

**Table S5.** Crystal data and structure refinement for **43**.

|                                                  |                                                            |                     |
|--------------------------------------------------|------------------------------------------------------------|---------------------|
| Identification code                              | <b>43</b>                                                  |                     |
| Empirical formula                                | $C_{27}H_{19}N_3$                                          |                     |
| Formula weight                                   | 385.45                                                     |                     |
| Temperature (K)                                  | 293(2)                                                     |                     |
| Wavelength (Å)                                   | 1.3405                                                     |                     |
| Crystal system                                   | monoclinic                                                 |                     |
| Space group                                      | $P2_1/n$                                                   |                     |
| Unit cell dimensions (Å, °)                      | $a = 7.4603(7)$                                            | $\alpha = 90$       |
|                                                  | $b = 14.0260(12)$                                          | $\beta = 98.736(9)$ |
|                                                  | $c = 19.2722(15)$                                          | $\gamma = 90$       |
| Volume (Å <sup>3</sup> )                         | 1993.2(3)                                                  |                     |
| Z                                                | 4                                                          |                     |
| Calculated density (g cm <sup>-3</sup> )         | 1.284                                                      |                     |
| Absorption coefficient (mm <sup>-1</sup> )       | 0.378                                                      |                     |
| $F_{000}$                                        | 808                                                        |                     |
| Crystal size (mm <sup>3</sup> )                  | 0.20 × 0.08 × 0.06                                         |                     |
| θ range for data collection (°)                  | 4.880 to 61.269                                            |                     |
| Miller index ranges                              | $-7 \leq h \leq 9, -17 \leq k \leq 18, -25 \leq l \leq 25$ |                     |
| Reflections collected                            | 15293                                                      |                     |
| Independent reflections                          | 4475 [ $R_{int} = 0.0811$ ]                                |                     |
| Completeness to $\theta_{max}$ (%)               | 0.956                                                      |                     |
| Max. and min. transmission                       | 0.64115 and 1.00000                                        |                     |
| Refinement method                                | Full-matrix least-squares on $F^2$                         |                     |
| Data / restraints / parameters                   | 4475 / 0 / 273                                             |                     |
| Goodness-of-fit on $F^2$                         | 1.059                                                      |                     |
| Final R indices [ $I > 2\sigma(I)$ ]             | $R1 = 0.0911, wR2 = 0.2560$                                |                     |
| R indices (all data)                             | $R1 = 0.1169, wR2 = 0.2871$                                |                     |
| Extinction coefficient                           | 0.0103(16)                                                 |                     |
| Largest diff. peak and hole (e Å <sup>-3</sup> ) | 0.365 and -0.398                                           |                     |

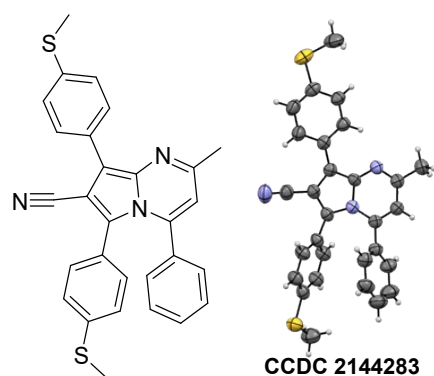

**Table S6.** Crystal data and structure refinement for **45**.

|                                                  |                                                            |                     |
|--------------------------------------------------|------------------------------------------------------------|---------------------|
| Identification code                              | <b>45</b>                                                  |                     |
| Empirical formula                                | $C_{29}H_{23}N_3S_2$                                       |                     |
| Formula weight                                   | 477.62                                                     |                     |
| Temperature (K)                                  | 293(2)                                                     |                     |
| Wavelength (Å)                                   | 1.3405                                                     |                     |
| Crystal system                                   | monoclinic                                                 |                     |
| Space group                                      | $P2_1/n$                                                   |                     |
| Unit cell dimensions (Å, °)                      | $a = 17.7692(18)$                                          | $\alpha = 90$       |
|                                                  | $b = 7.5870(6)$                                            | $\beta = 91.248(8)$ |
|                                                  | $c = 17.8377(14)$                                          | $\gamma = 90$       |
| Volume (Å <sup>3</sup> )                         | 2404.2(4)                                                  |                     |
| <i>Z</i>                                         | 4                                                          |                     |
| Calculated density (g cm <sup>-3</sup> )         | 1.319                                                      |                     |
| Absorption coefficient (mm <sup>-1</sup> )       | 1.429                                                      |                     |
| $F_{000}$                                        | 2010                                                       |                     |
| Crystal size (mm <sup>3</sup> )                  | 0.20 × 0.06 × 0.05                                         |                     |
| $\theta$ range for data collection (°)           | 3.019 to 61.341                                            |                     |
| Miller index ranges                              | $-22 \leq h \leq 23, -9 \leq k \leq 5, -23 \leq l \leq 22$ |                     |
| Reflections collected                            | 18194                                                      |                     |
| Independent reflections                          | 5419 [ $R_{int} = 0.0380$ ]                                |                     |
| Completeness to $\theta_{max}$ (%)               | 0.959                                                      |                     |
| Max. and min. transmission                       | 0.63518 and 1.00000                                        |                     |
| Refinement method                                | Full-matrix least-squares on $F^2$                         |                     |
| Data / restraints / parameters                   | 5419 / 0 / 311                                             |                     |
| Goodness-of-fit on $F^2$                         | 1.155                                                      |                     |
| Final <i>R</i> indices [ $I > 2\sigma(I)$ ]      | $R1 = 0.0787, wR2 = 0.2282$                                |                     |
| <i>R</i> indices (all data)                      | $R1 = 0.1065, wR2 = 0.2975$                                |                     |
| Extinction coefficient                           | 0.0075(13)                                                 |                     |
| Largest diff. peak and hole (e Å <sup>-3</sup> ) | 0.542 and -0.733                                           |                     |

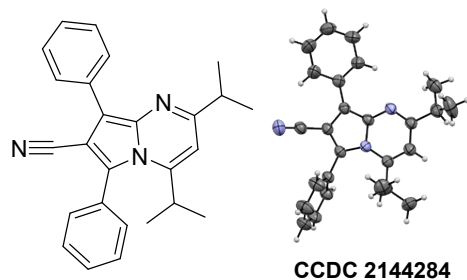

**Table S7.** Crystal data and structure refinement for **47**.

|                                                  |                                                              |               |
|--------------------------------------------------|--------------------------------------------------------------|---------------|
| Identification code                              | <b>47</b>                                                    |               |
| Empirical formula                                | $C_{26}H_{25}N_3$                                            |               |
| Formula weight                                   | 379.49                                                       |               |
| Temperature (K)                                  | 293(2)                                                       |               |
| Wavelength (Å)                                   | 1.3405                                                       |               |
| Crystal system                                   | orthorhombic                                                 |               |
| Space group                                      | <i>Pbcn</i>                                                  |               |
| Unit cell dimensions (Å, °)                      | $a = 19.753(2)$                                              | $\alpha = 90$ |
|                                                  | $b = 10.6344(12)$                                            | $\beta = 90$  |
|                                                  | $c = 20.535(3)$                                              | $\gamma = 90$ |
| Volume (Å <sup>3</sup> )                         | 4313.7(9)                                                    |               |
| Z                                                | 8                                                            |               |
| Calculated density (g cm <sup>-3</sup> )         | 1.169                                                        |               |
| Absorption coefficient (mm <sup>-1</sup> )       | 0.339                                                        |               |
| $F_{000}$                                        | 1616                                                         |               |
| Crystal size (mm <sup>3</sup> )                  | 0.23 × 0.03 × 0.02                                           |               |
| θ range for data collection (°)                  | 3.743 to 61.322                                              |               |
| Miller index ranges                              | $-23 \leq h \leq 25, -10 \leq k \leq 13, -23 \leq l \leq 26$ |               |
| Reflections collected                            | 18140                                                        |               |
| Independent reflections                          | 4878 [ $R_{int} = 0.0429$ ]                                  |               |
| Completeness to $\theta_{max}$ (%)               | 0.963                                                        |               |
| Max. and min. transmission                       | 0.56368 and 1.00000                                          |               |
| Refinement method                                | Full-matrix least-squares on $F^2$                           |               |
| Data / restraints / parameters                   | 4878 / 0 / 267                                               |               |
| Goodness-of-fit on $F^2$                         | 1.135                                                        |               |
| Final R indices [ $I > 2\sigma(I)$ ]             | $R1 = 0.0596, wR2 = 0.1549$                                  |               |
| R indices (all data)                             | $R1 = 0.0911, wR2 = 0.2038$                                  |               |
| Extinction coefficient                           | 0.0017(3)                                                    |               |
| Largest diff. peak and hole (e Å <sup>-3</sup> ) | 0.249 and -0.245                                             |               |

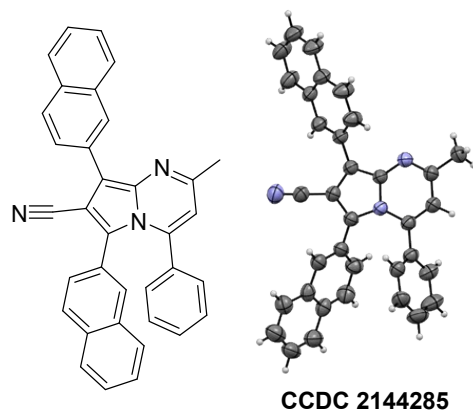

CCDC 2144285

**Table S8.** Crystal data and structure refinement for **49**.

|                                                              |                                                              |                       |
|--------------------------------------------------------------|--------------------------------------------------------------|-----------------------|
| Identification code                                          | <b>49</b>                                                    |                       |
| Empirical formula                                            | C <sub>35</sub> H <sub>23</sub> N <sub>3</sub>               |                       |
| Formula weight                                               | 485.56                                                       |                       |
| Temperature (K)                                              | 293(2)                                                       |                       |
| Wavelength (Å)                                               | 1.3405                                                       |                       |
| Crystal system                                               | monoclinic                                                   |                       |
| Space group                                                  | <i>P</i> 2 <sub>1</sub> / <i>c</i>                           |                       |
| Unit cell dimensions (Å, °)                                  | <i>a</i> = 9.7978(12)                                        | $\alpha$ = 90         |
|                                                              | <i>b</i> = 27.007(2)                                         | $\beta$ = 116.236(16) |
|                                                              | <i>c</i> = 10.7502(14)                                       | $\gamma$ = 90         |
| Volume (Å <sup>3</sup> )                                     | 2551.5(6)                                                    |                       |
| <i>Z</i>                                                     | 4                                                            |                       |
| Calculated density (g cm <sup>-3</sup> )                     | 1.264                                                        |                       |
| Absorption coefficient (mm <sup>-1</sup> )                   | 0.367                                                        |                       |
| <i>F</i> <sub>000</sub>                                      | 1016                                                         |                       |
| Crystal size (mm <sup>3</sup> )                              | 0.22 × 0.05 × 0.04                                           |                       |
| $\theta$ range for data collection (°)                       | 2.845 to 61.289                                              |                       |
| Miller index ranges                                          | -11 ≤ <i>h</i> ≤ 12, -33 ≤ <i>k</i> ≤ 34, -13 ≤ <i>l</i> ≤ 9 |                       |
| Reflections collected                                        | 22817                                                        |                       |
| Independent reflections                                      | 5767 [ <i>R</i> <sub>int</sub> = 0.0378]                     |                       |
| Completeness to $\theta_{\max}$ (%)                          | 0.964                                                        |                       |
| Max. and min. transmission                                   | 0.42123 and 1.00000                                          |                       |
| Refinement method                                            | Full-matrix least-squares on <i>F</i> <sup>2</sup>           |                       |
| Data / restraints / parameters                               | 5767 / 0 / 345                                               |                       |
| Goodness-of-fit on <i>F</i> <sup>2</sup>                     | 1.090                                                        |                       |
| Final <i>R</i> indices [ <i>I</i> > 2 $\sigma$ ( <i>I</i> )] | <i>R</i> 1 = 0.0883, <i>wR</i> 2 = 0.2547                    |                       |
| <i>R</i> indices (all data)                                  | <i>R</i> 1 = 0.1109, <i>wR</i> 2 = 0.2749                    |                       |
| Extinction coefficient                                       | 0.0011(4)                                                    |                       |
| Largest diff. peak and hole (e Å <sup>-3</sup> )             | 0.841 and -0.328                                             |                       |

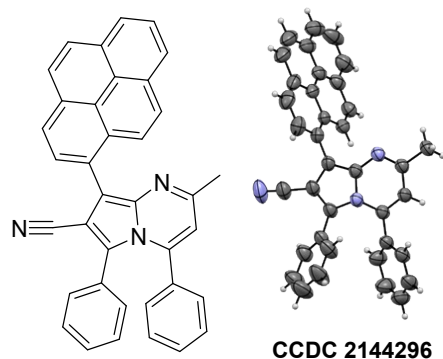

**Table S9.** Crystal data and structure refinement for **50**.

|                                                  |                                                              |                      |
|--------------------------------------------------|--------------------------------------------------------------|----------------------|
| Identification code                              | <b>50</b>                                                    |                      |
| Empirical formula                                | $C_{38}H_{25}Cl_2N_3$                                        |                      |
| Formula weight                                   | 594.51                                                       |                      |
| Temperature (K)                                  | 293(2)                                                       |                      |
| Wavelength (Å)                                   | 1.3405                                                       |                      |
| Crystal system                                   | monoclinic                                                   |                      |
| Space group                                      | $P2_1/c$                                                     |                      |
| Unit cell dimensions (Å, °)                      | $a = 11.6662(4)$                                             | $\alpha = 90$        |
|                                                  | $b = 23.9537(7)$                                             | $\beta = 115.611(4)$ |
|                                                  | $c = 12.5820(4)$                                             | $\gamma = 90$        |
| Volume (Å <sup>3</sup> )                         | 3170.6(2)                                                    |                      |
| <i>Z</i>                                         | 4                                                            |                      |
| Calculated density (g cm <sup>-3</sup> )         | 1.245                                                        |                      |
| Absorption coefficient (mm <sup>-1</sup> )       | 1.367                                                        |                      |
| $F_{000}$                                        | 1232                                                         |                      |
| Crystal size (mm <sup>3</sup> )                  | × ×                                                          |                      |
| $\theta$ range for data collection (°)           | 3.748 to 60.706                                              |                      |
| Miller index ranges                              | $-15 \leq h \leq 15, -30 \leq k \leq 29, -11 \leq l \leq 16$ |                      |
| Reflections collected                            | 28166                                                        |                      |
| Independent reflections                          | 7132 [ $R_{int} = 0.0266$ ]                                  |                      |
| Completeness to $\theta_{max}$ (%)               | 0.975                                                        |                      |
| Max. and min. transmission                       | 0.86075 and 1.00000                                          |                      |
| Refinement method                                | Full-matrix least-squares on $F^2$                           |                      |
| Data / restraints / parameters                   | 7132 / 0 / 408                                               |                      |
| Goodness-of-fit on $F^2$                         | 1.755                                                        |                      |
| Final <i>R</i> indices [ $I > 2\sigma(I)$ ]      | $R1 = 0.1166, wR2 = 0.3977$                                  |                      |
| <i>R</i> indices (all data)                      | $R1 = 0.1305, wR2 = 0.4111$                                  |                      |
| Largest diff. peak and hole (e Å <sup>-3</sup> ) | 1.047 and -0.477                                             |                      |

# NMR Spectra

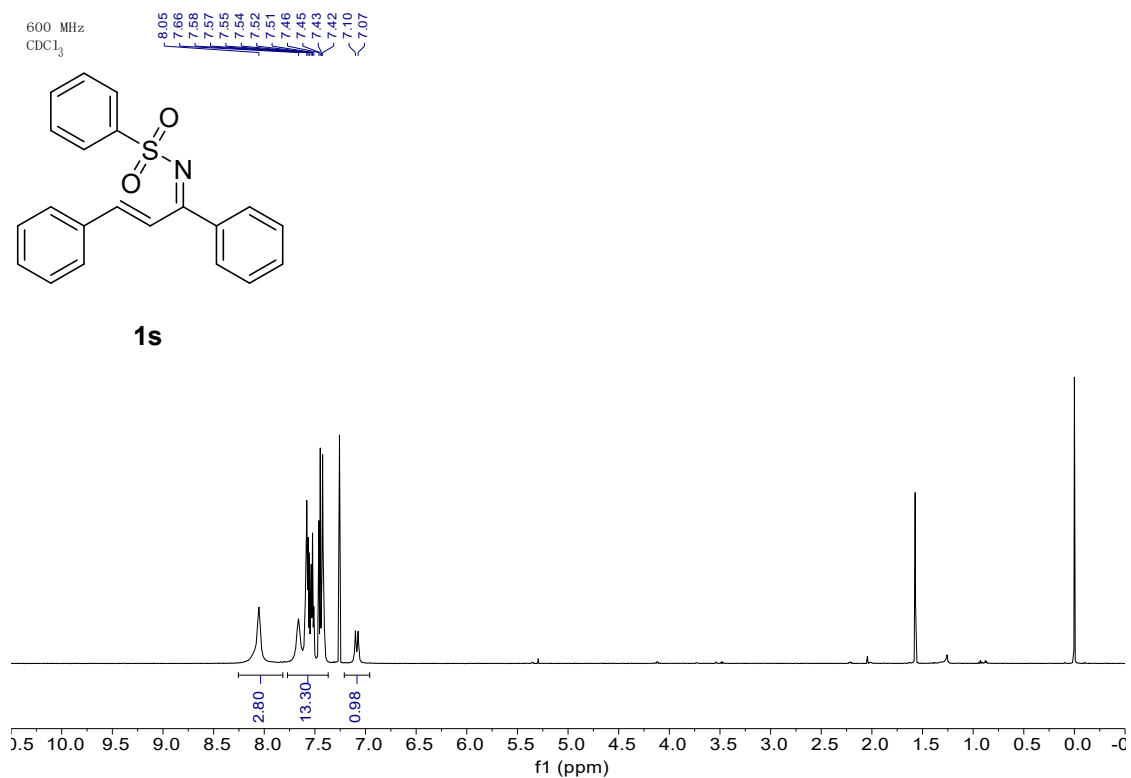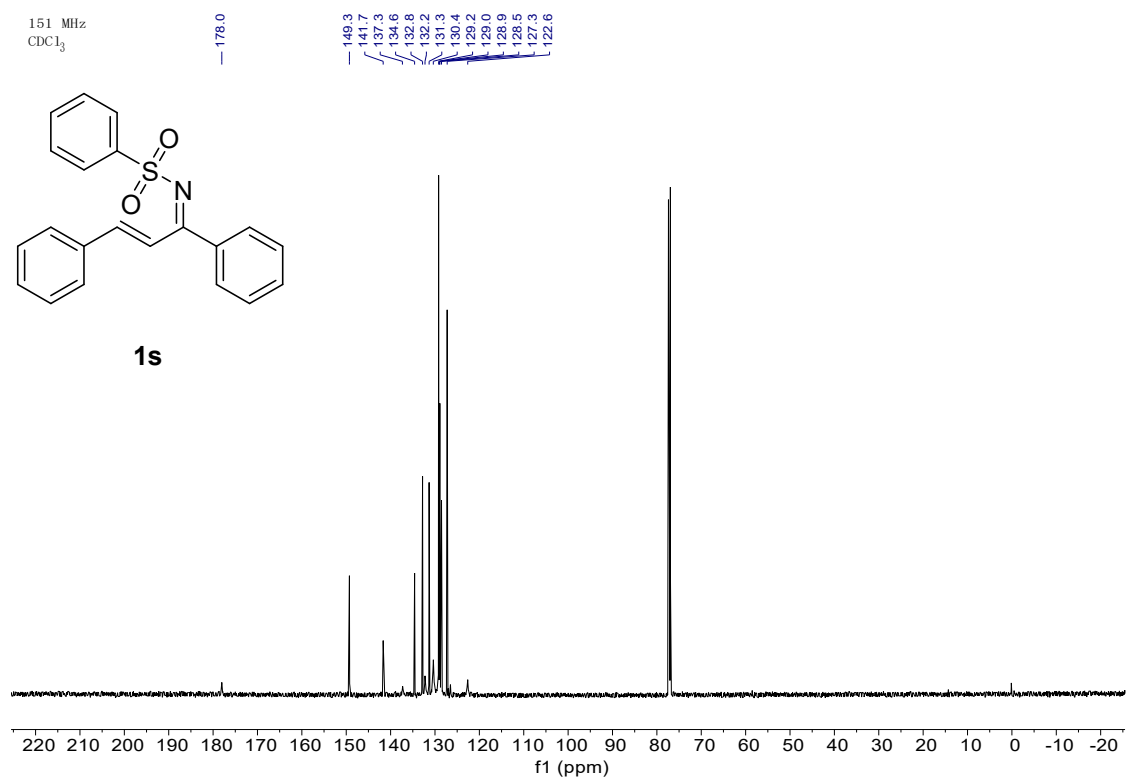

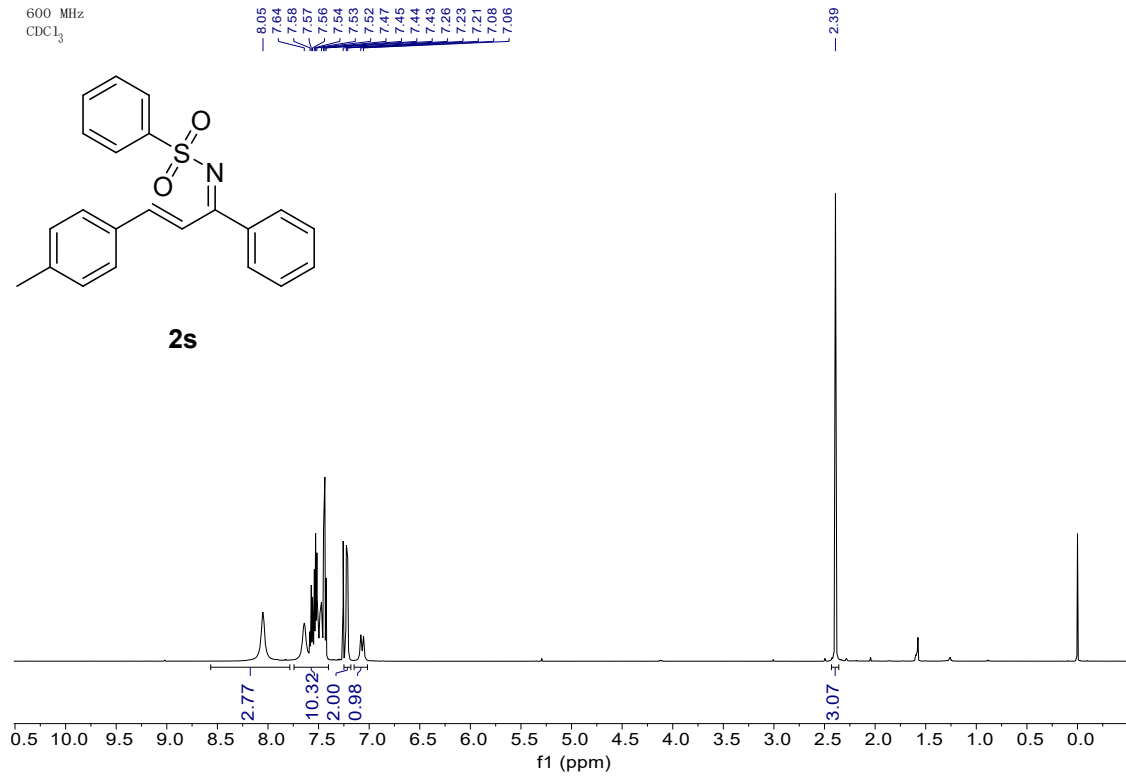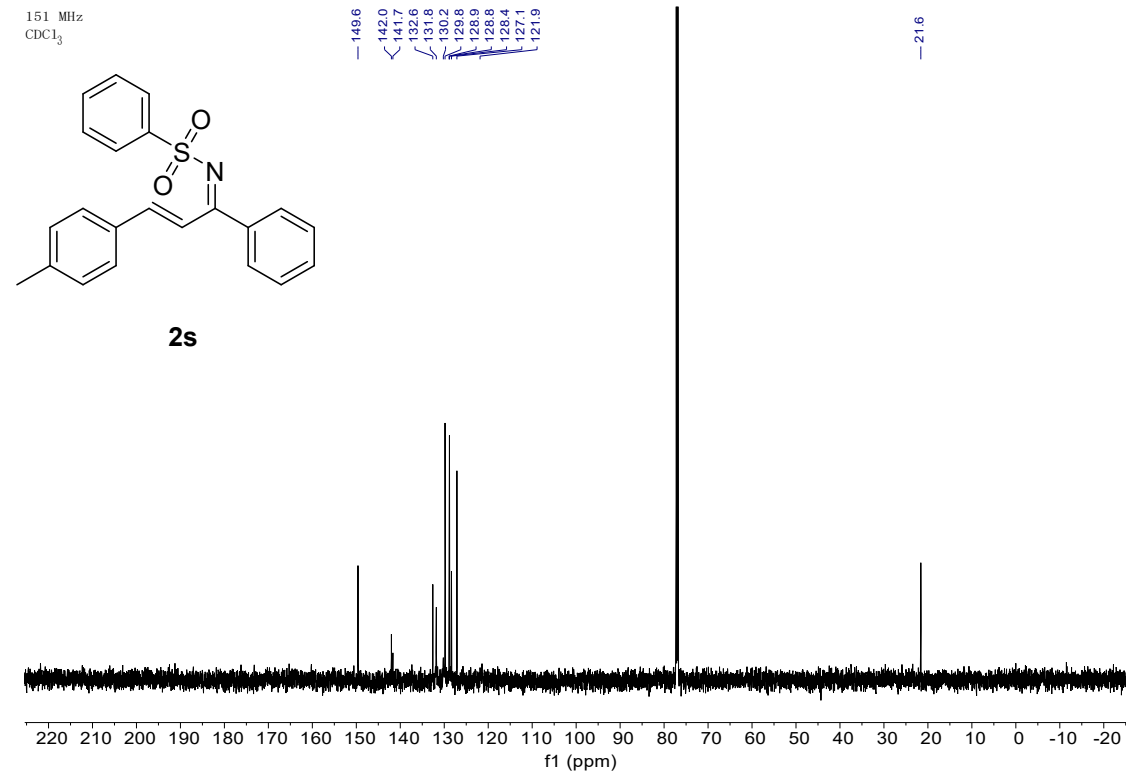

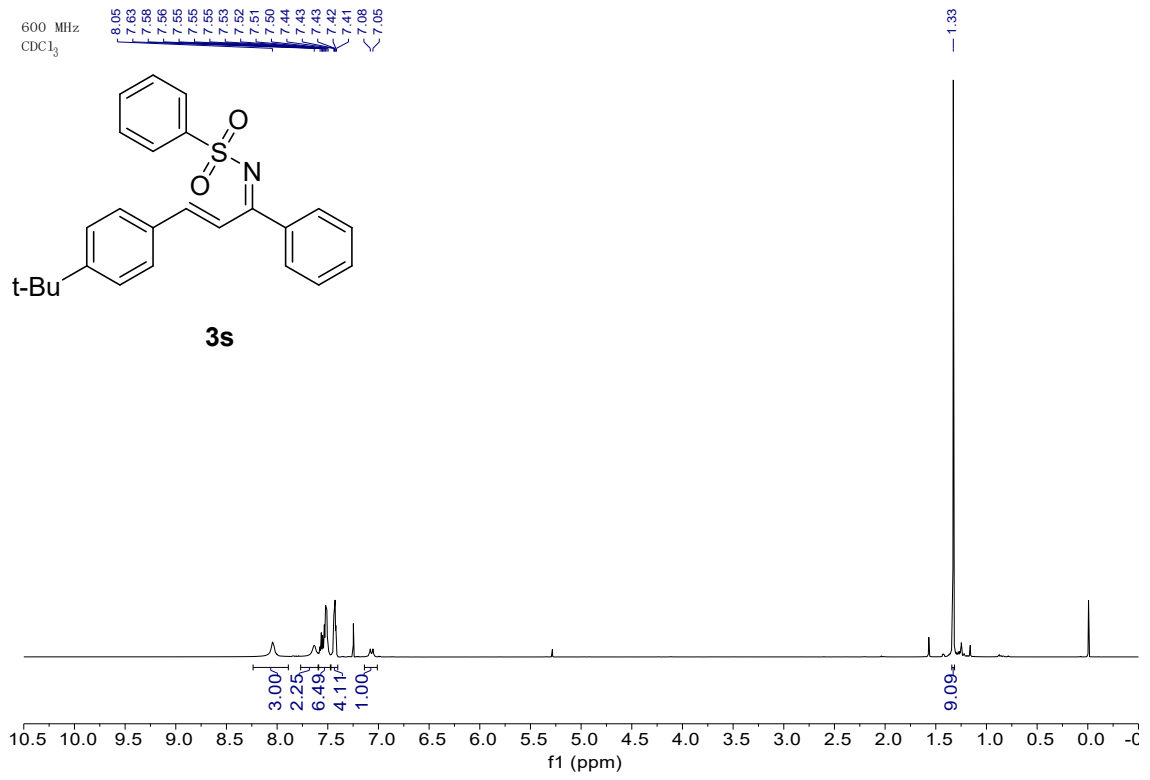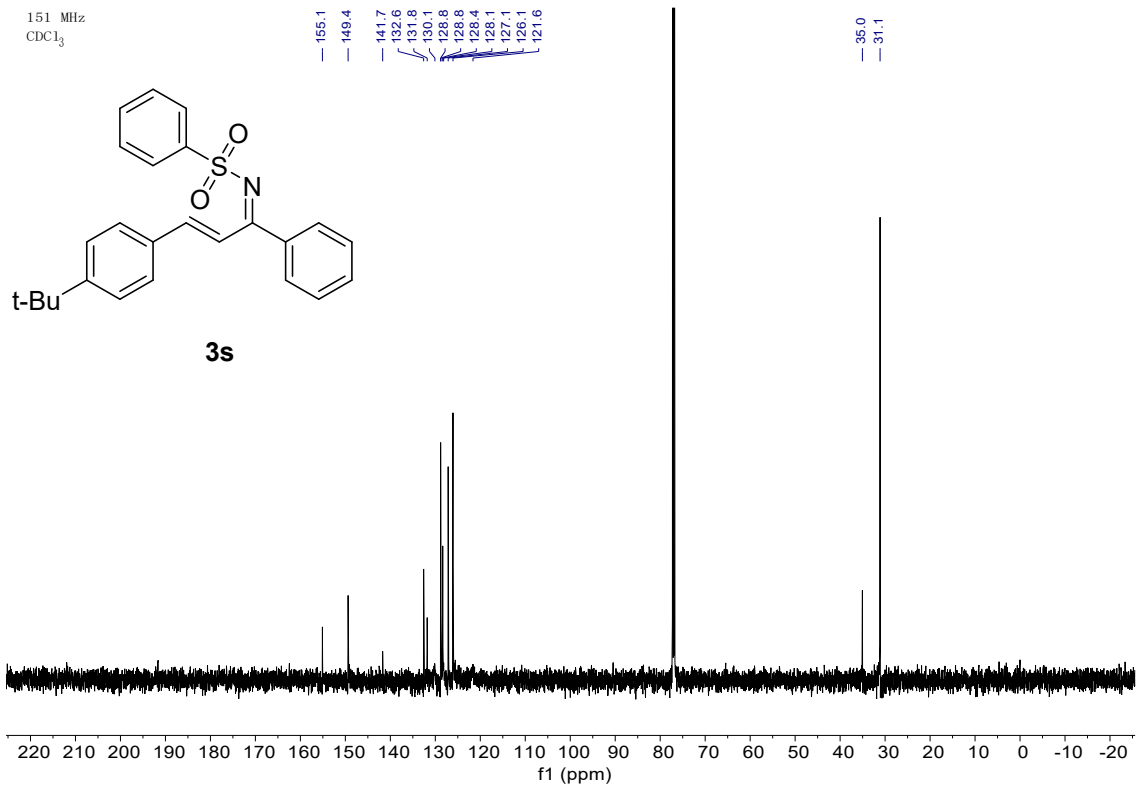



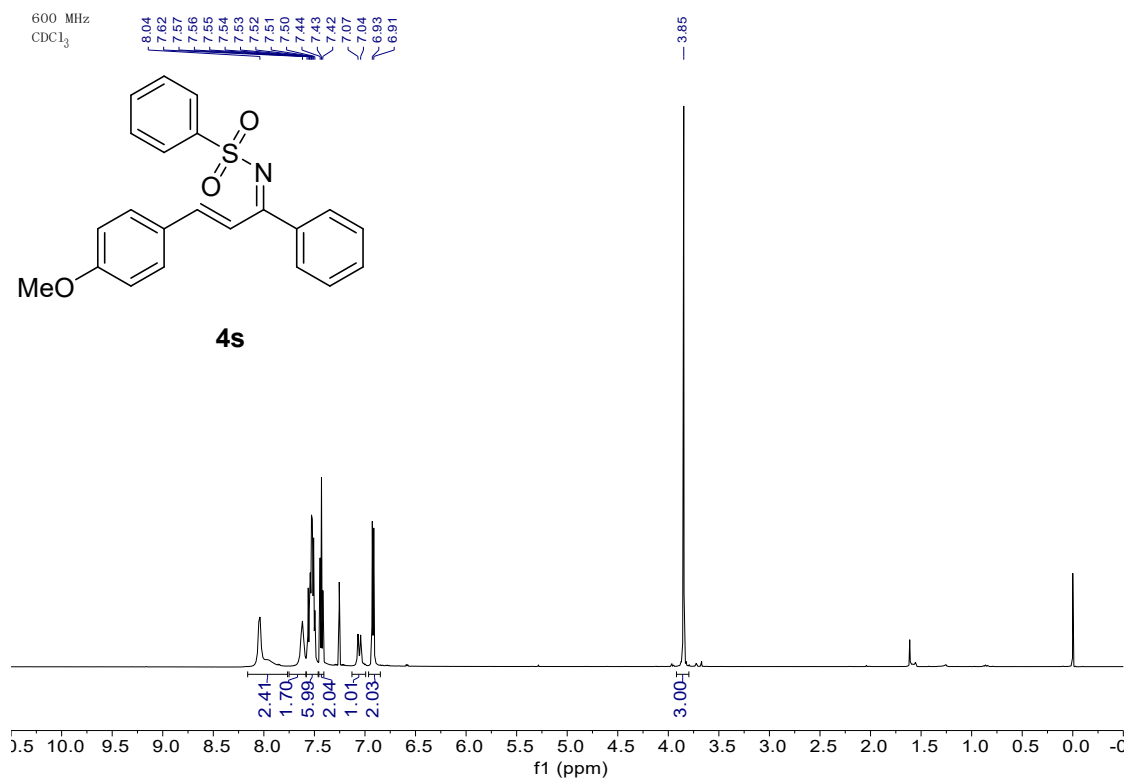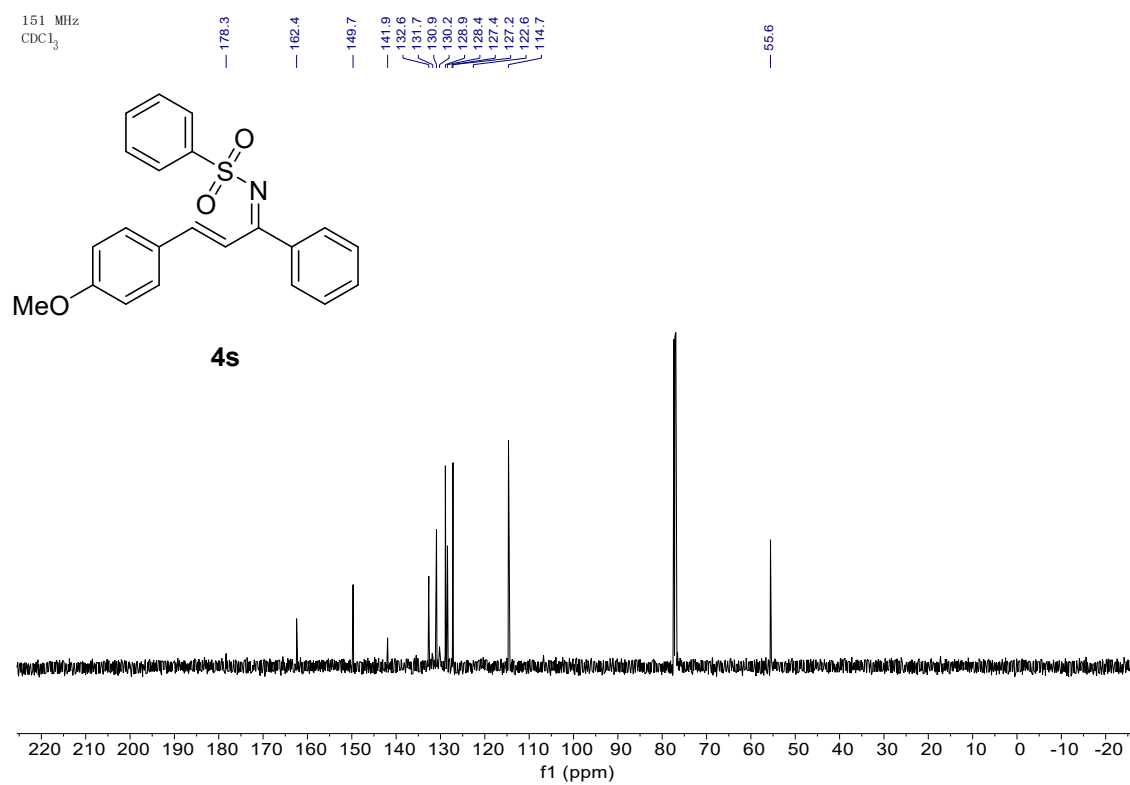

600 MHz  
CDCl<sub>3</sub>

8.04  
7.64  
7.57  
7.56  
7.54  
7.53  
7.51  
7.46  
7.43  
7.42  
7.11  
7.09  
7.08  
7.05  
7.02

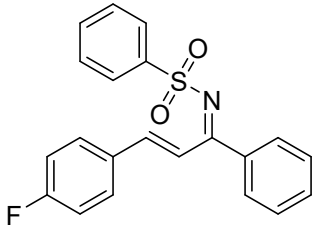

**5s**

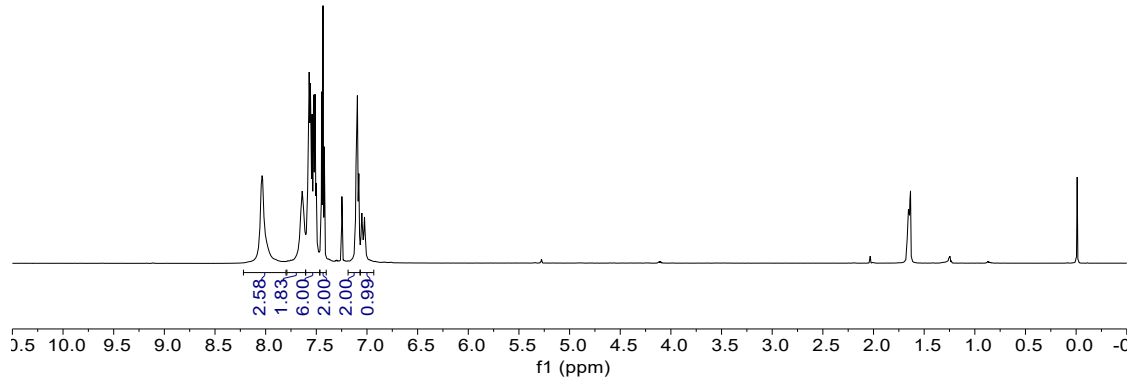

101 MHz  
CDCl<sub>3</sub>

177.7  
165.7  
163.2  
147.7  
141.5  
136.9  
132.8  
132.0  
130.8  
130.8  
130.8  
130.1  
130.1  
128.9  
127.1  
122.4  
116.4  
116.2

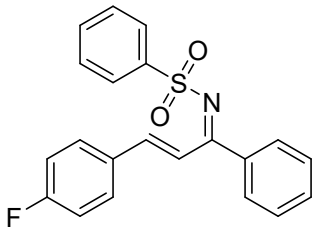

**5s**

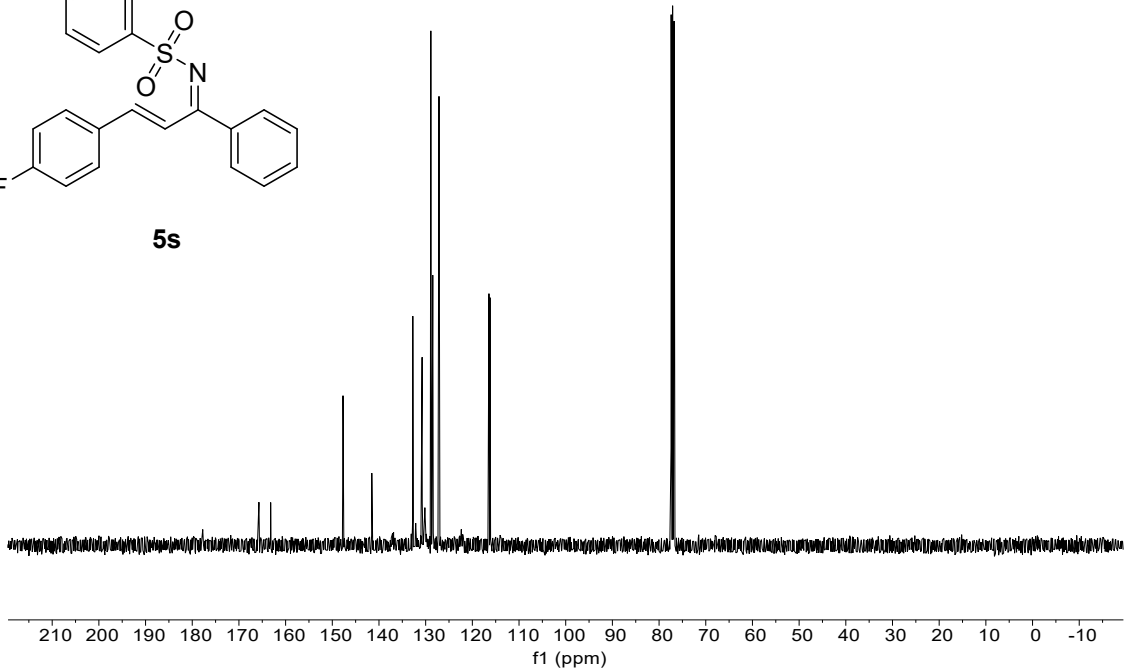

600 MHz  
CDCl<sub>3</sub>

8.04  
7.65  
7.60  
7.59  
7.55  
7.54  
7.53  
7.51  
7.46  
7.45  
7.43  
7.39  
7.38  
7.04  
7.02

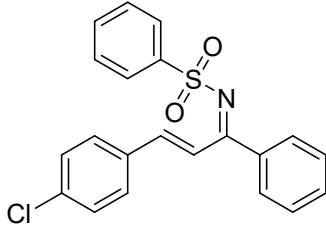

6s

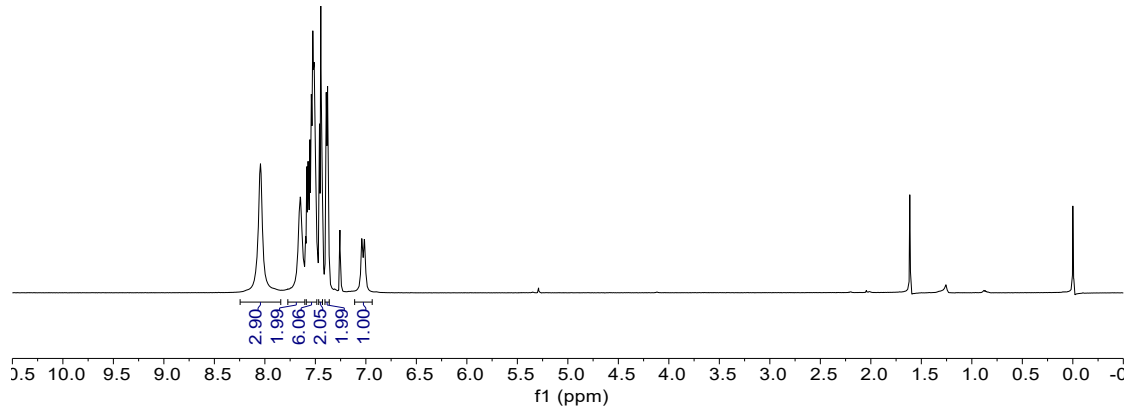

101 MHz  
CDCl<sub>3</sub>

177.6  
147.3  
141.5  
137.2  
136.9  
133.0  
132.8  
132.2  
130.2  
129.9  
129.4  
128.9  
128.5  
127.2  
123.0

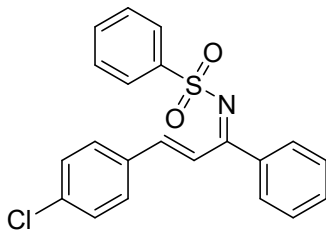

6s

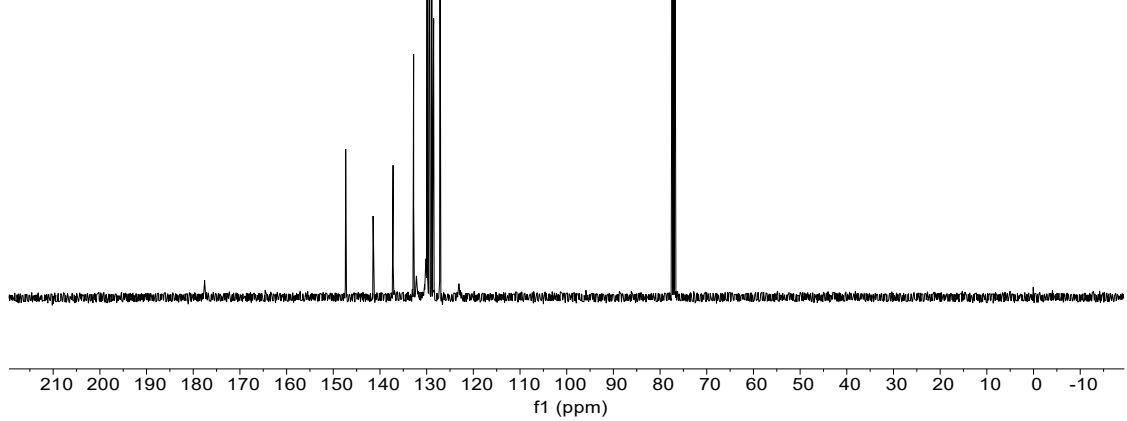

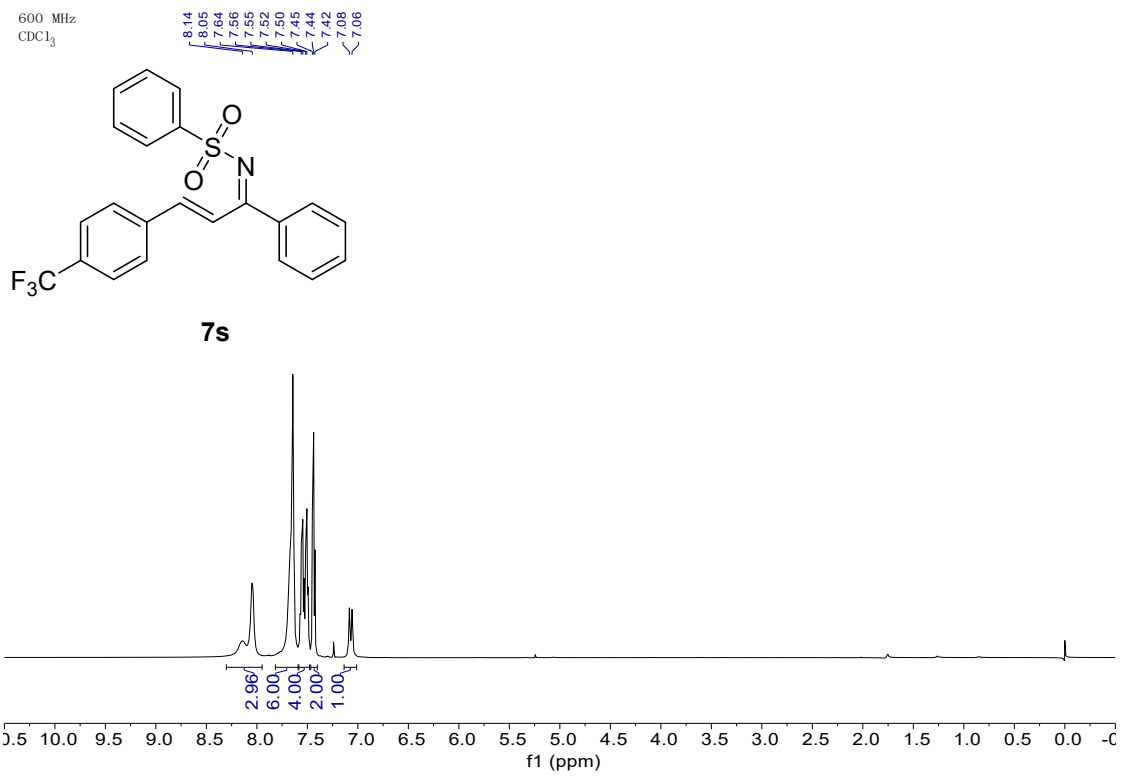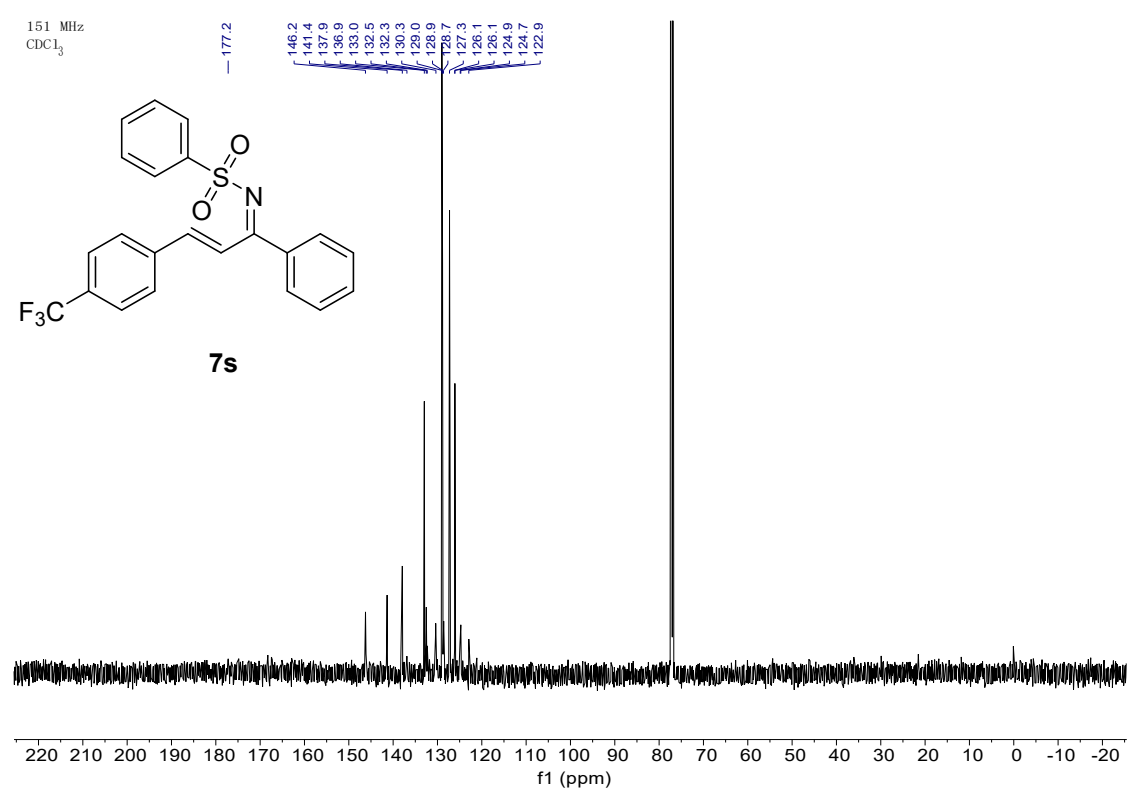

600 MHz  
CDCl<sub>3</sub>

8.06  
7.65  
7.59  
7.58  
7.57  
7.56  
7.55  
7.53  
7.52  
7.51  
7.45  
7.44  
7.43  
7.41  
7.37  
7.36  
7.30  
7.29  
7.25  
7.23  
7.08  
7.05

2.38

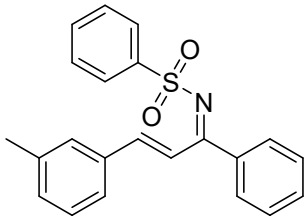

8s

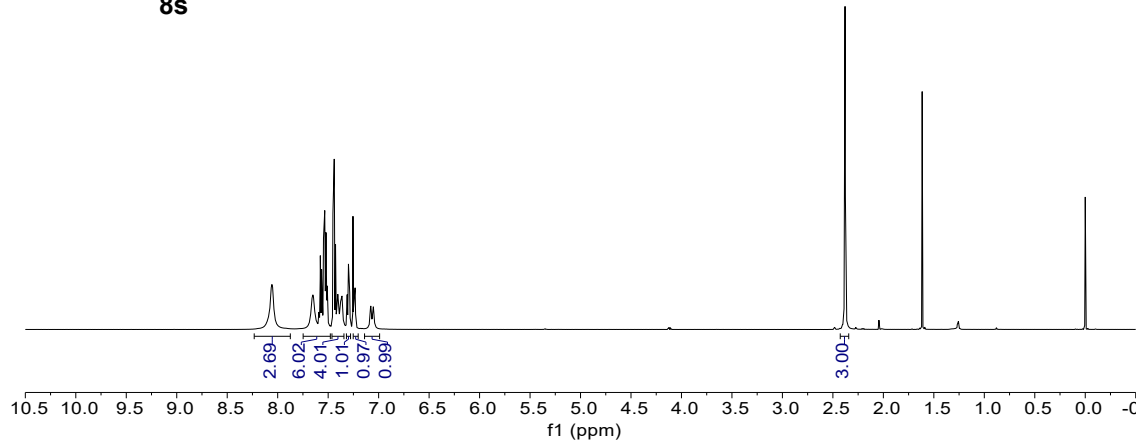

101 MHz  
CDCl<sub>3</sub>

178.2

148.6  
141.7  
138.8  
137.2  
134.5  
132.7  
132.0  
130.2  
128.3  
128.0  
128.9  
128.4  
127.2  
126.2  
122.4

21.3

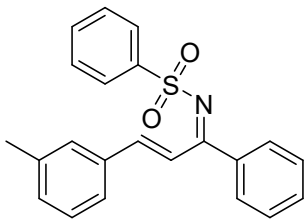

8s

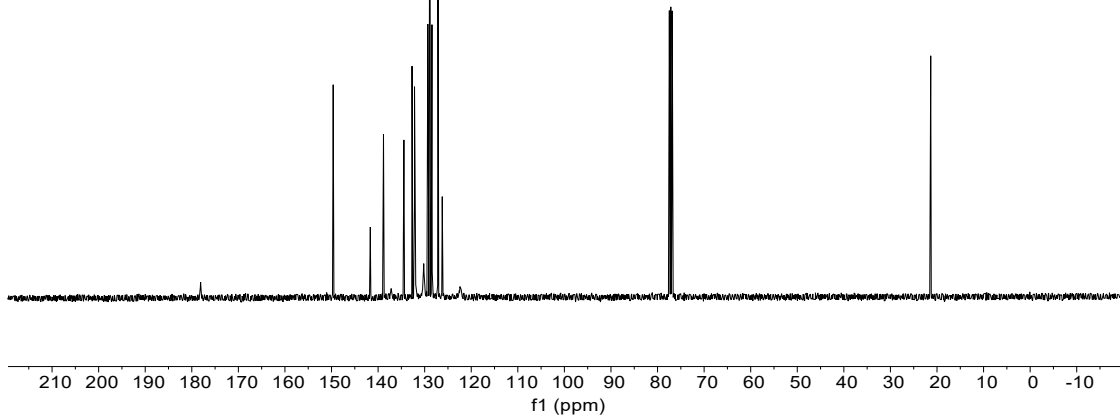

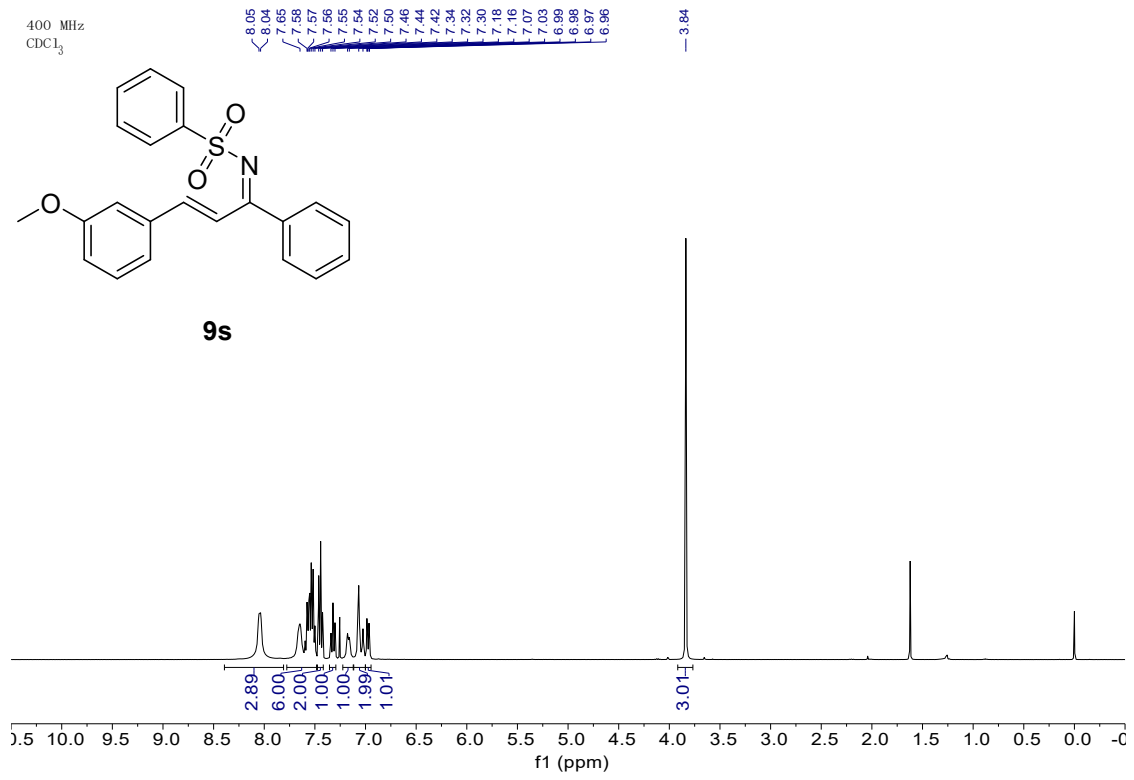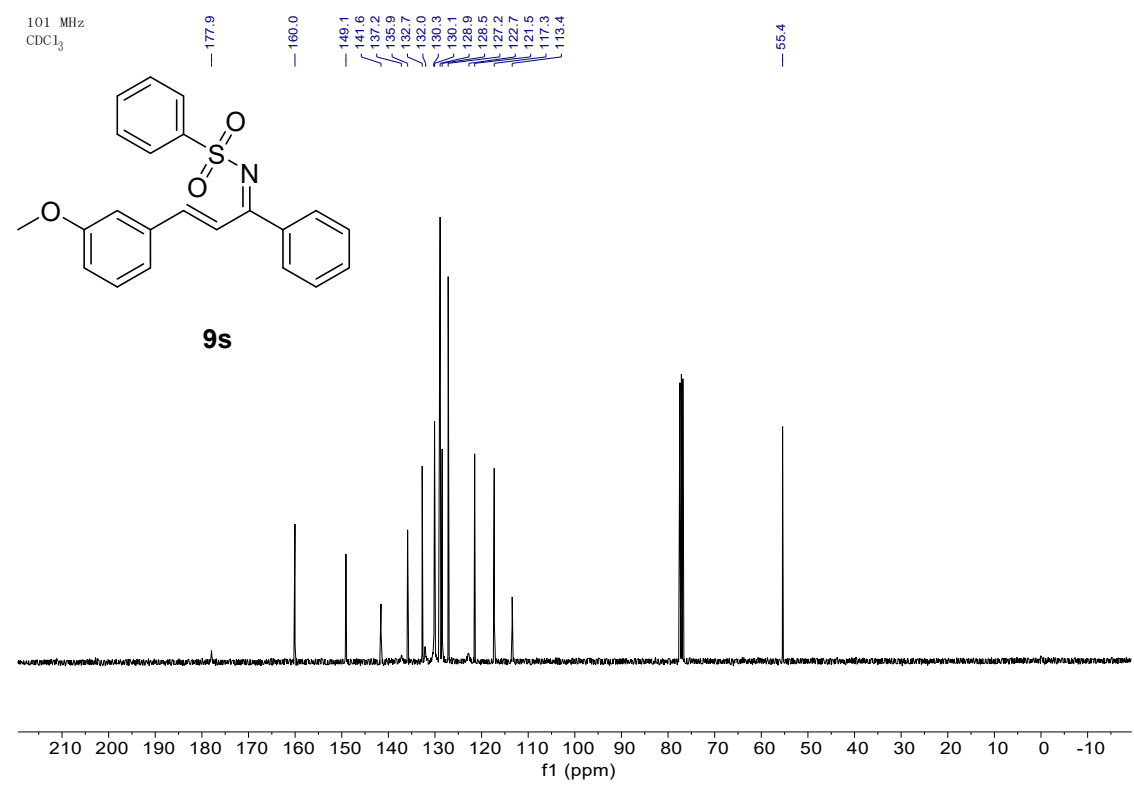

400 MHz  
CDCl<sub>3</sub>

8.05  
8.04  
7.67  
7.64  
7.60  
7.56  
7.55  
7.52  
7.50  
7.48  
7.44  
7.42  
7.30  
7.28  
7.25  
7.00  
6.96

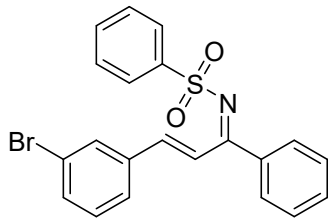

10s

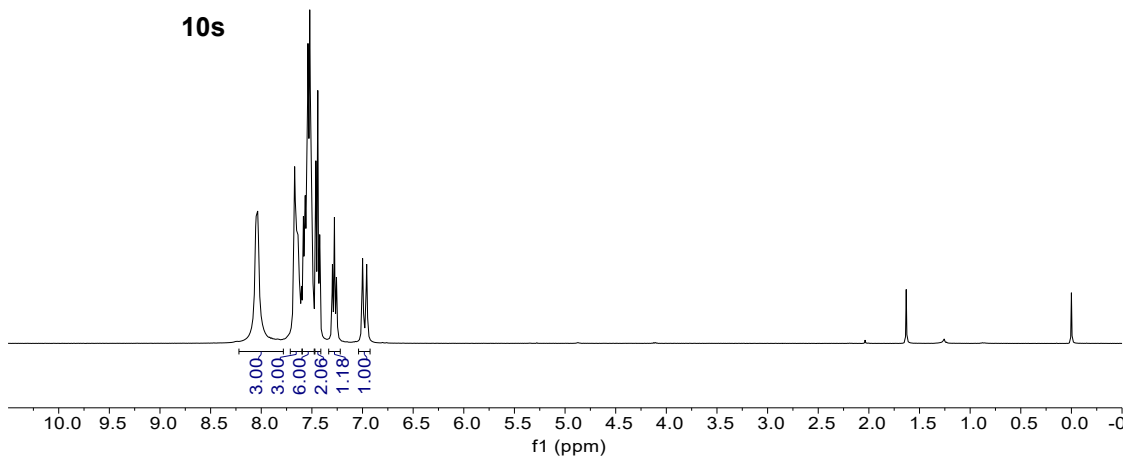

101 MHz  
CDCl<sub>3</sub>

177.4  
146.8  
141.4  
136.9  
136.6  
133.8  
132.8  
132.2  
131.5  
130.6  
130.2  
128.9  
128.5  
127.2  
127.0  
123.8  
123.2

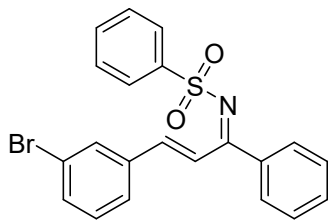

10s

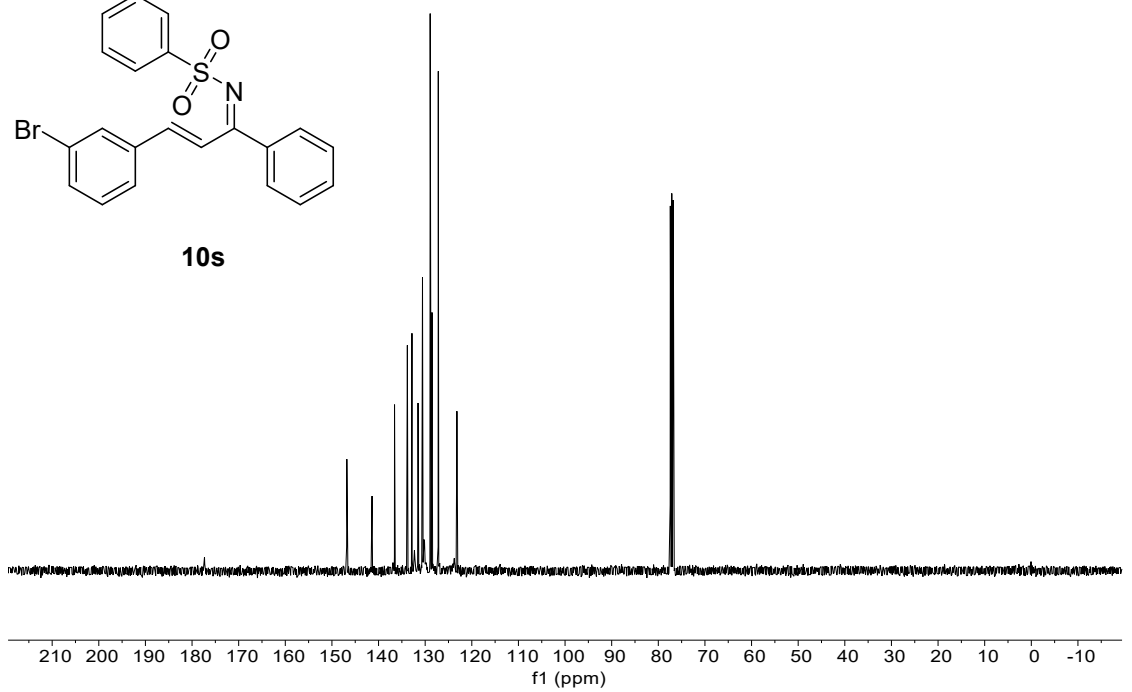

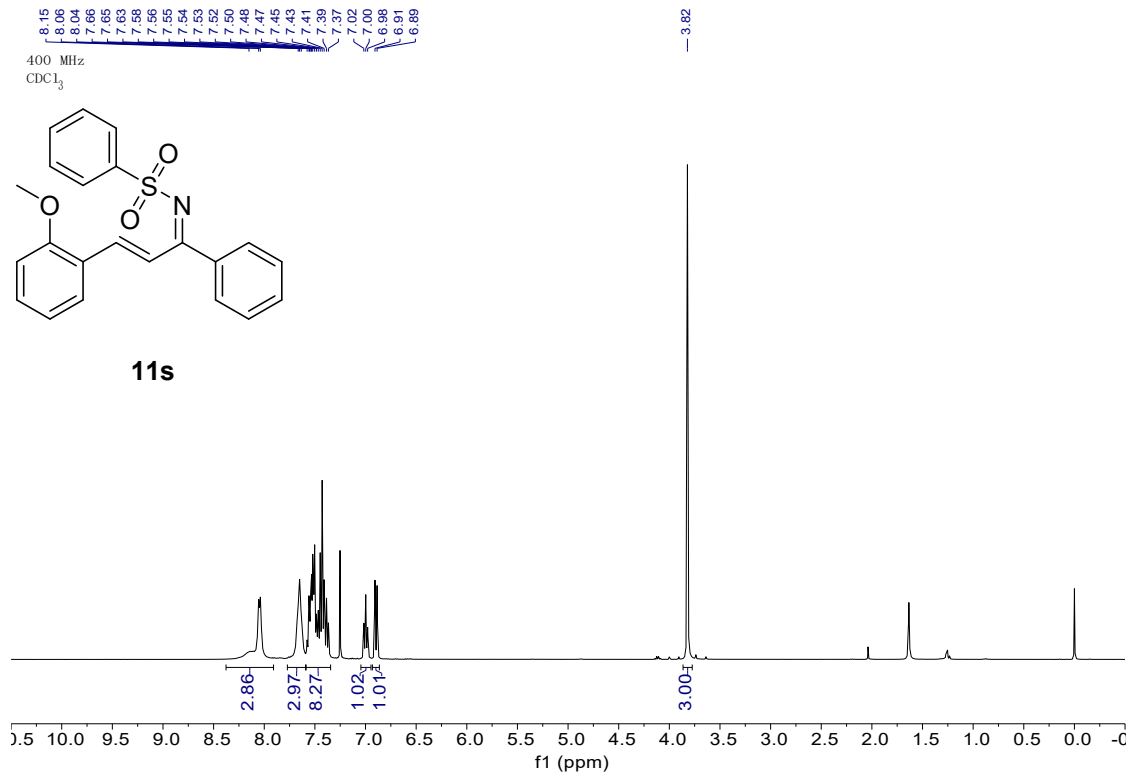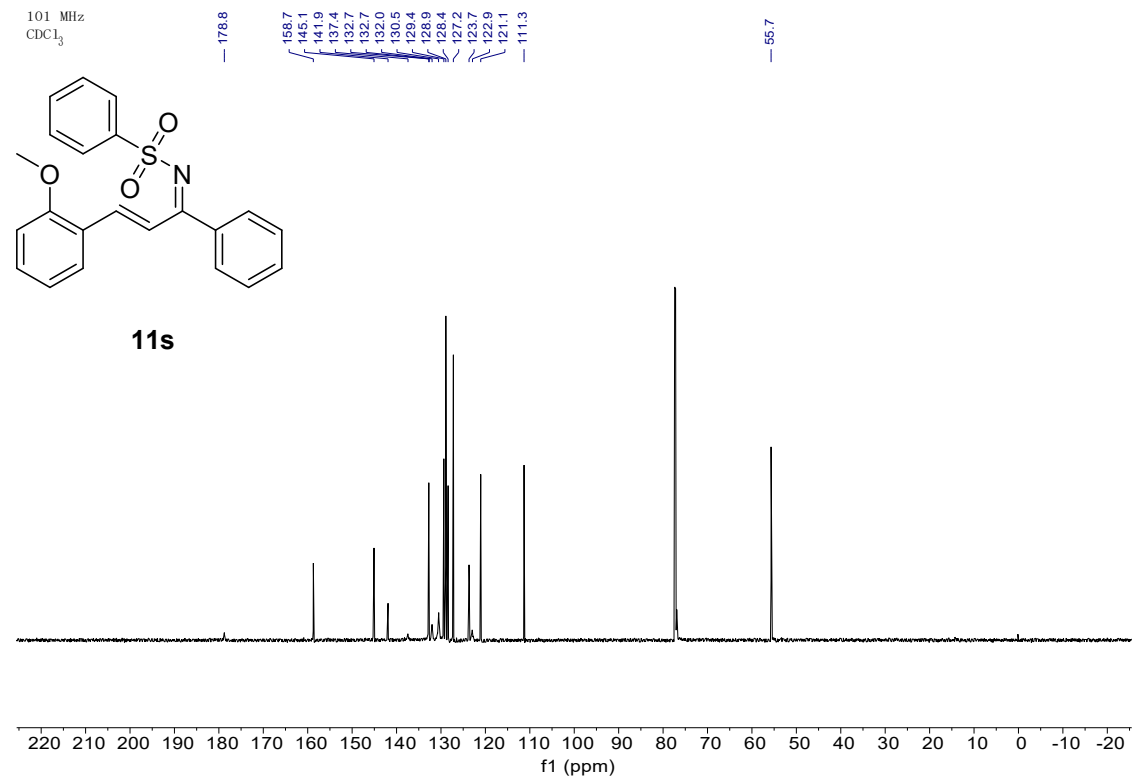



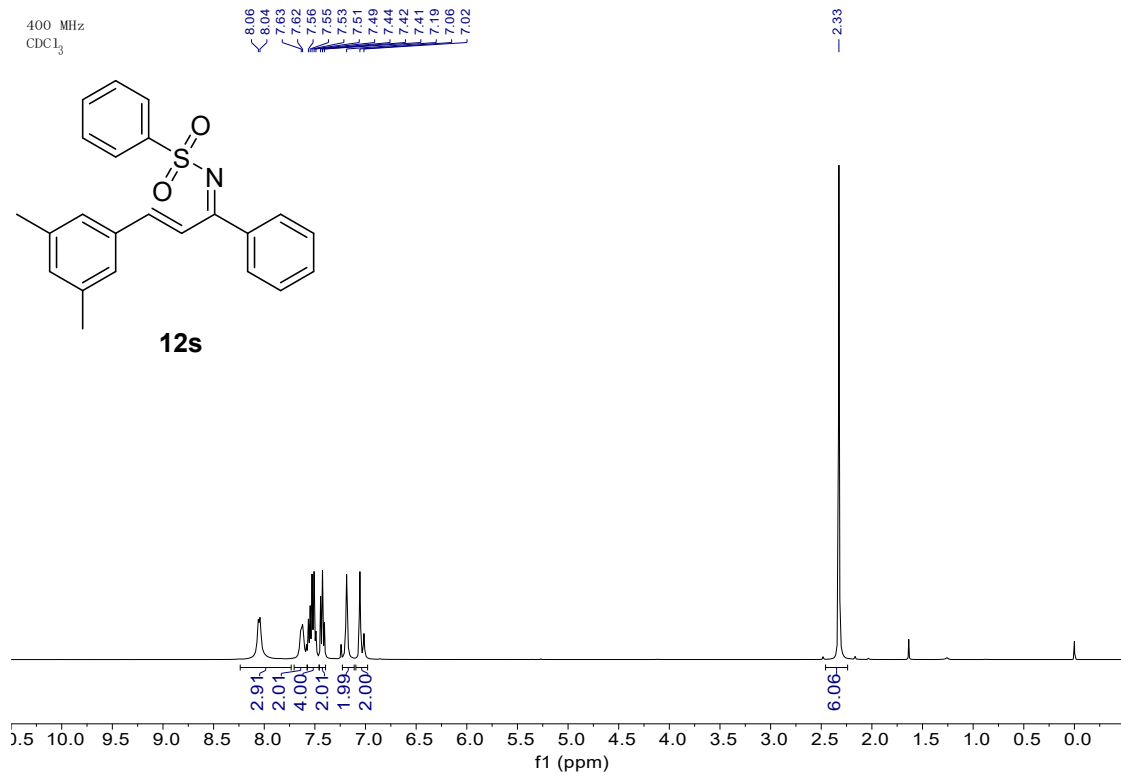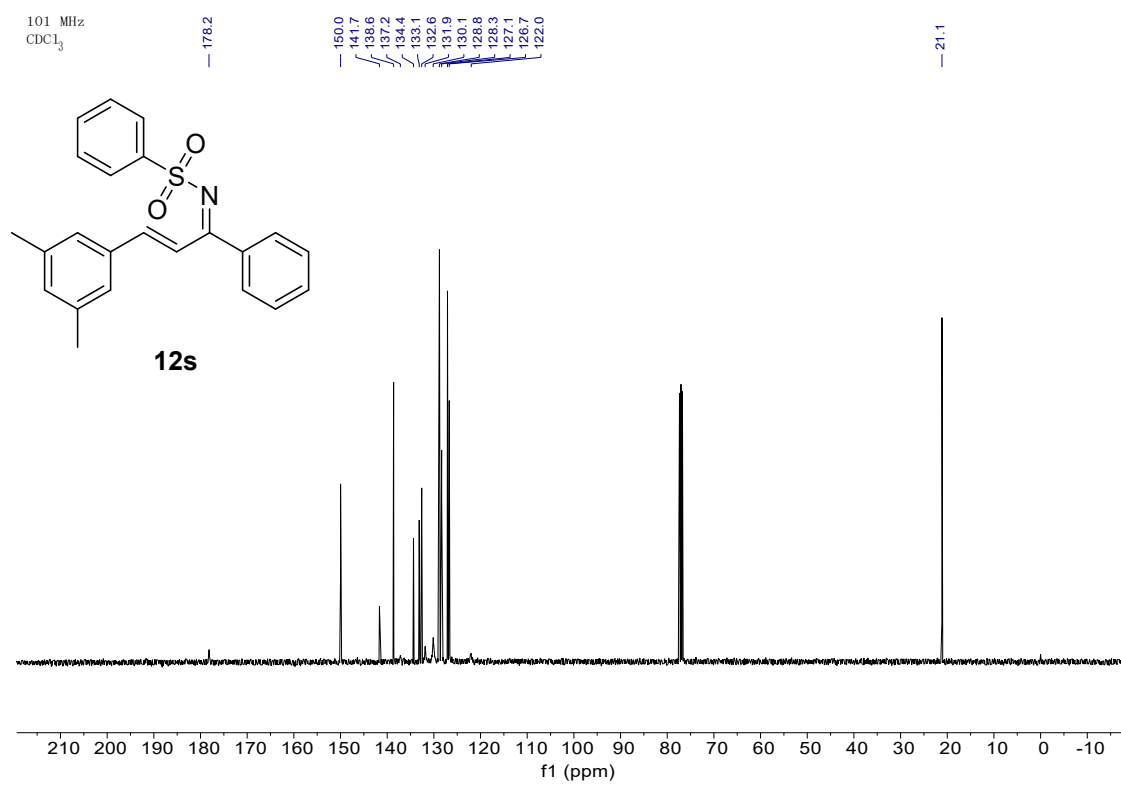

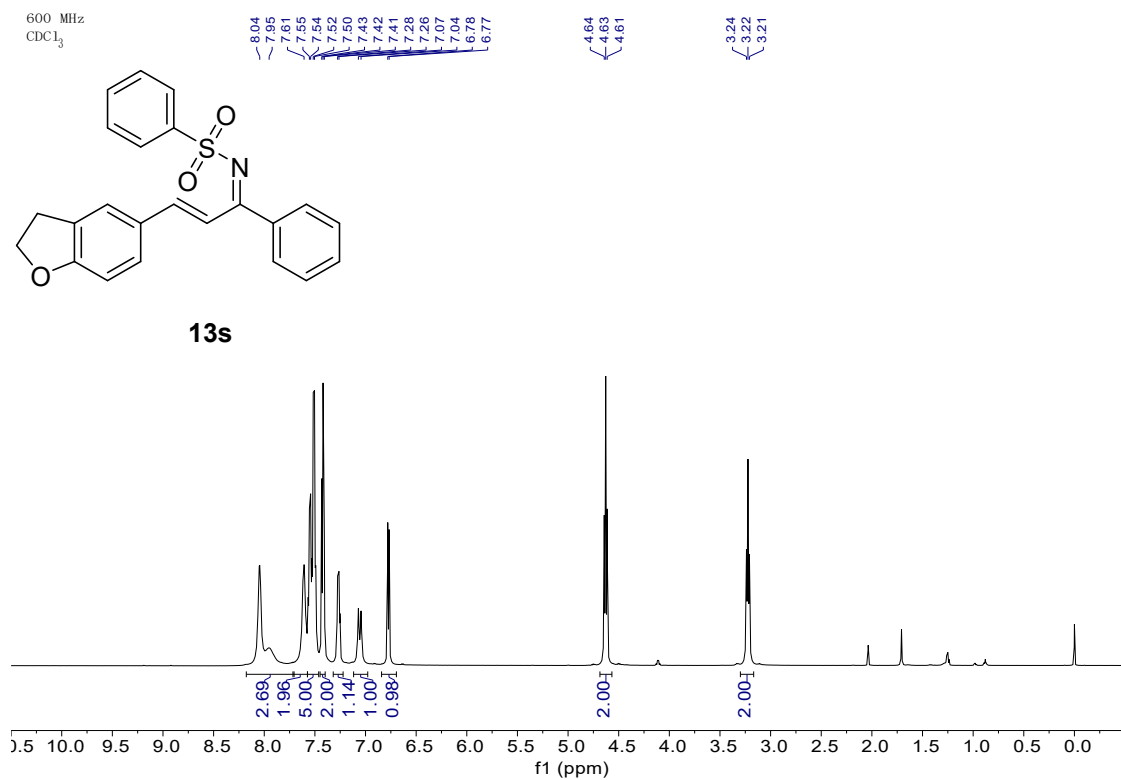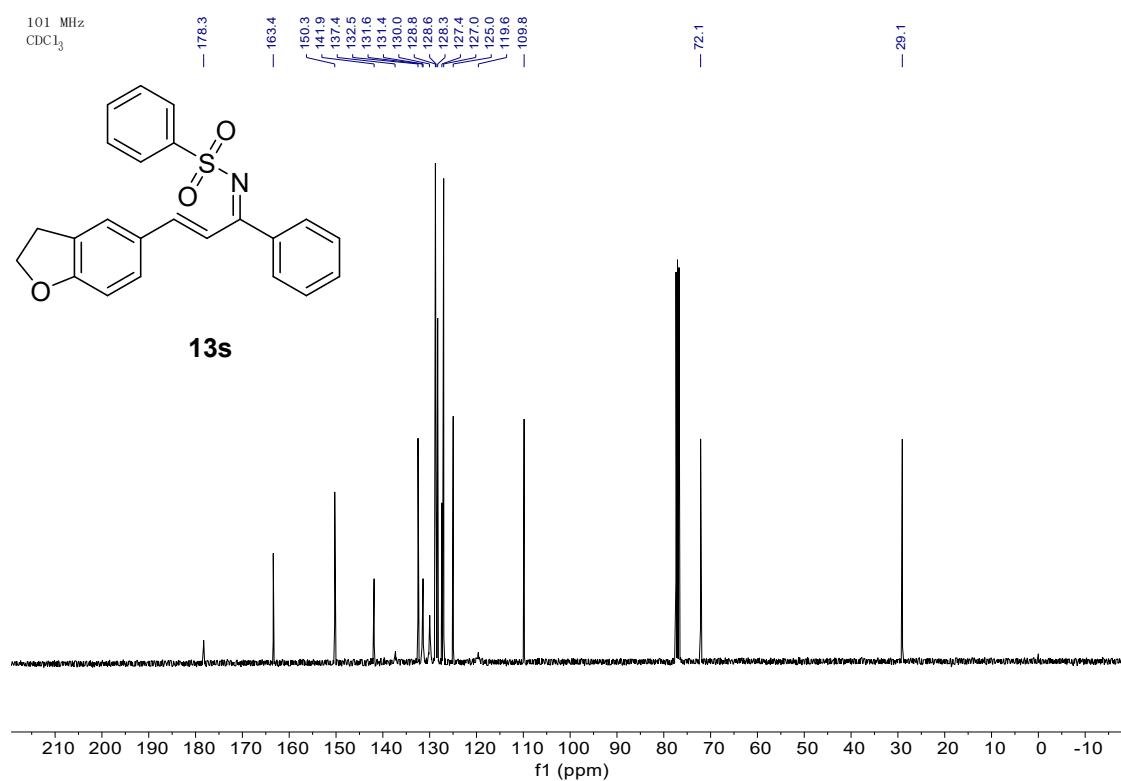

400 MHz  
CDCl<sub>3</sub>

8.04  
7.82  
7.63  
7.60  
7.58  
7.55  
7.53  
7.51  
7.50  
7.47  
7.45  
7.44  
7.42  
7.39  
6.97  
6.93

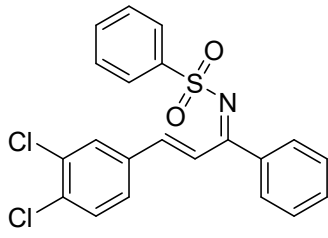

**14s**

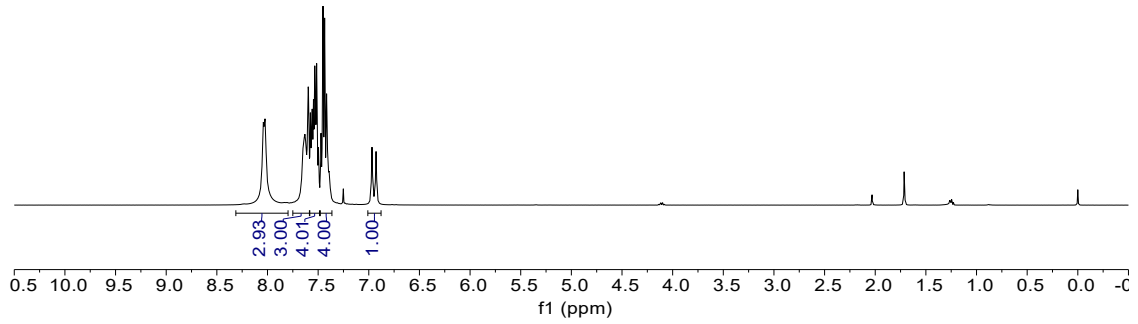

101 MHz  
CDCl<sub>3</sub>

177.1  
145.5  
141.3  
136.7  
135.0  
134.5  
133.4  
132.9  
132.4  
131.1  
130.3  
130.2  
128.6  
127.4  
124.2

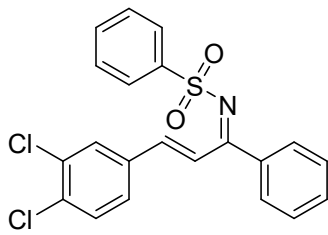

**14s**

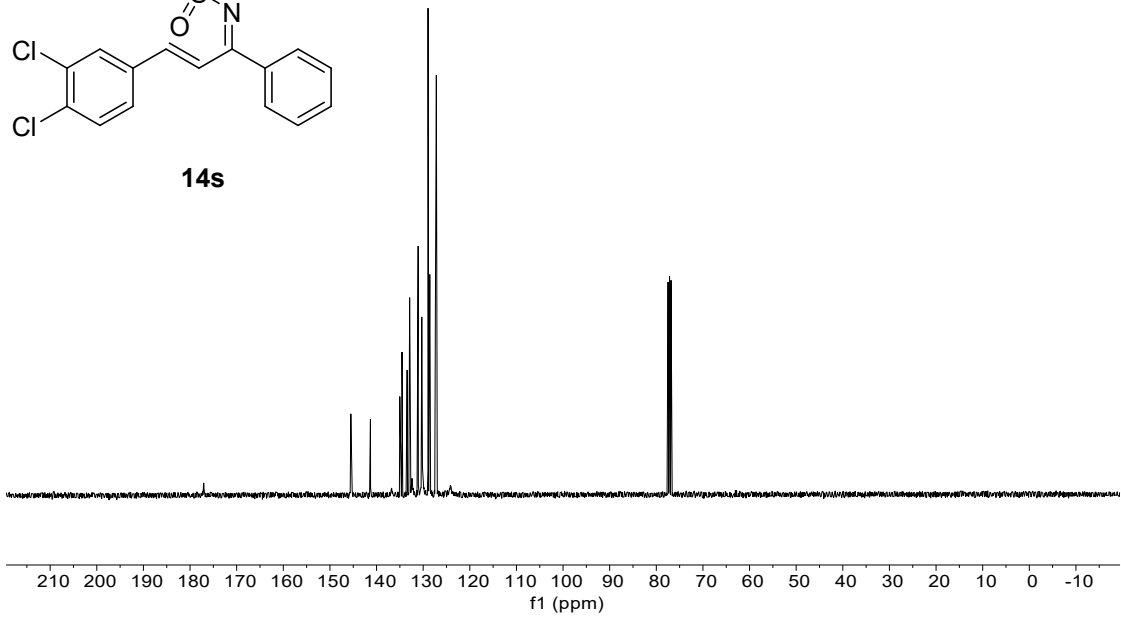

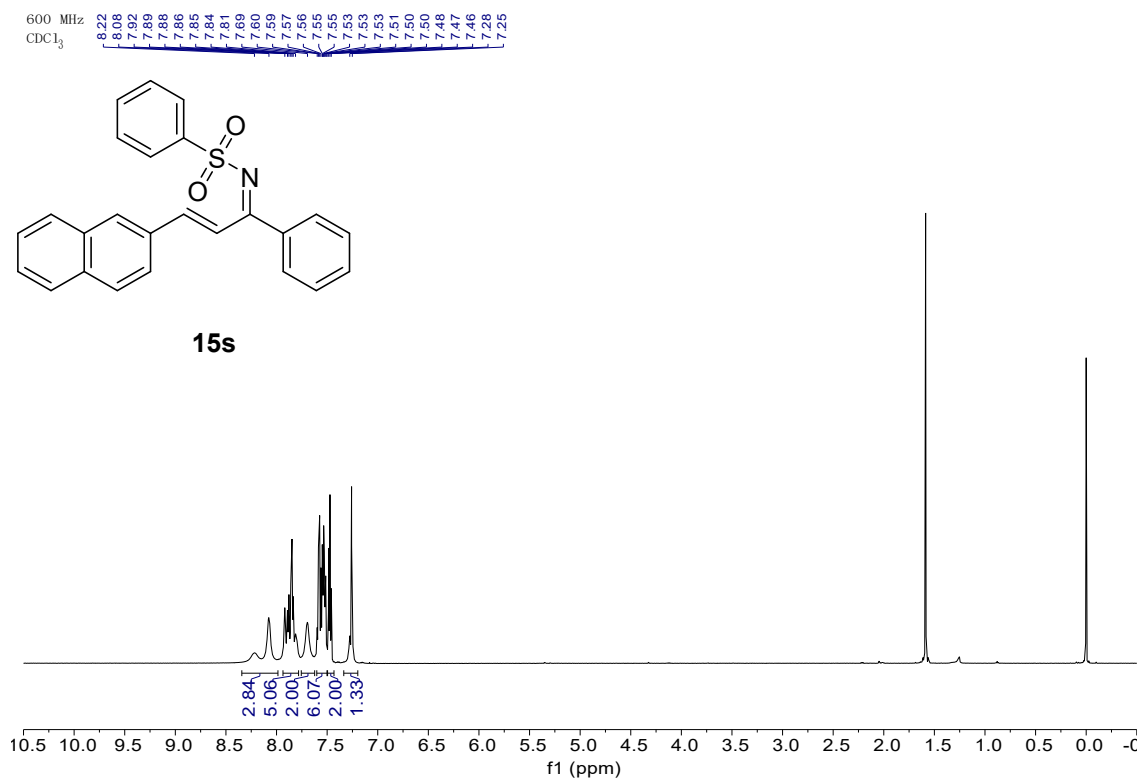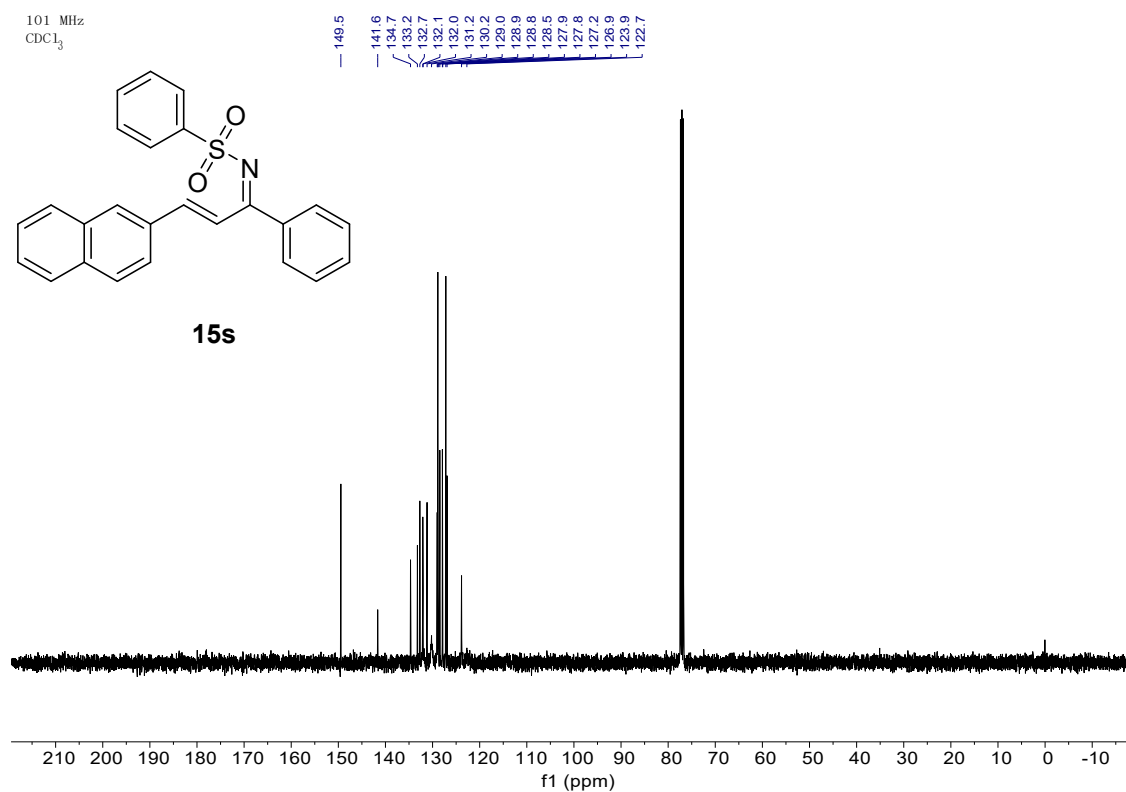

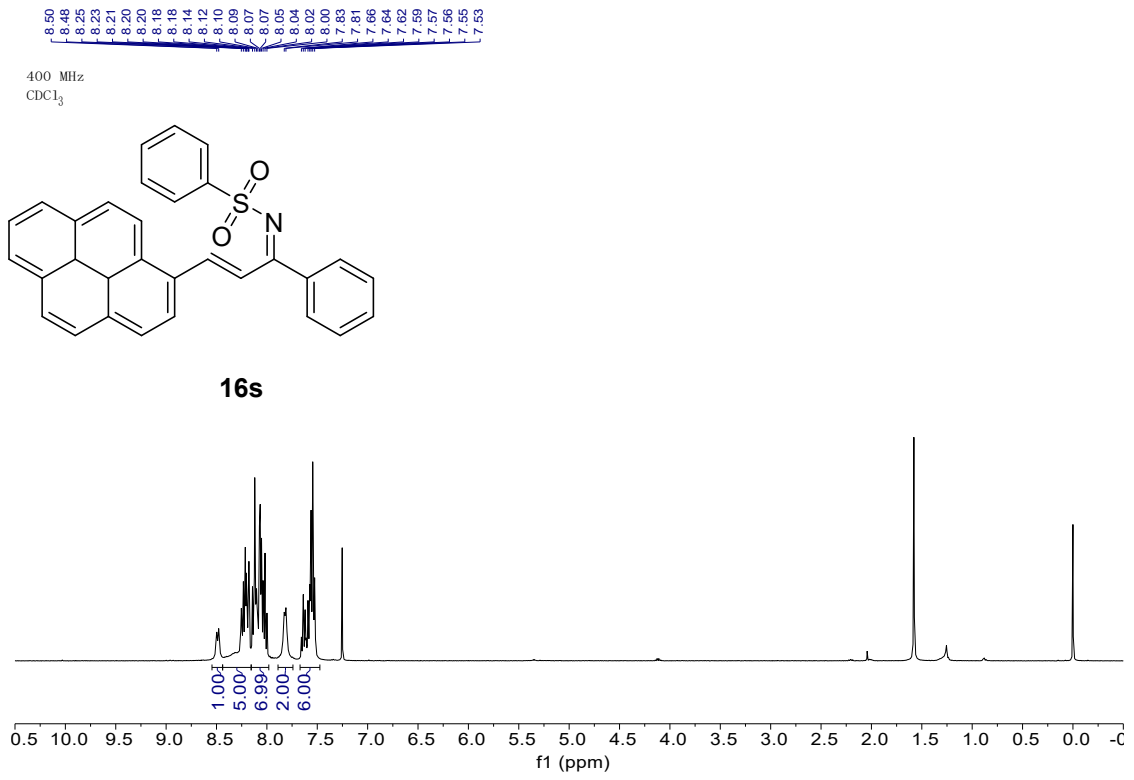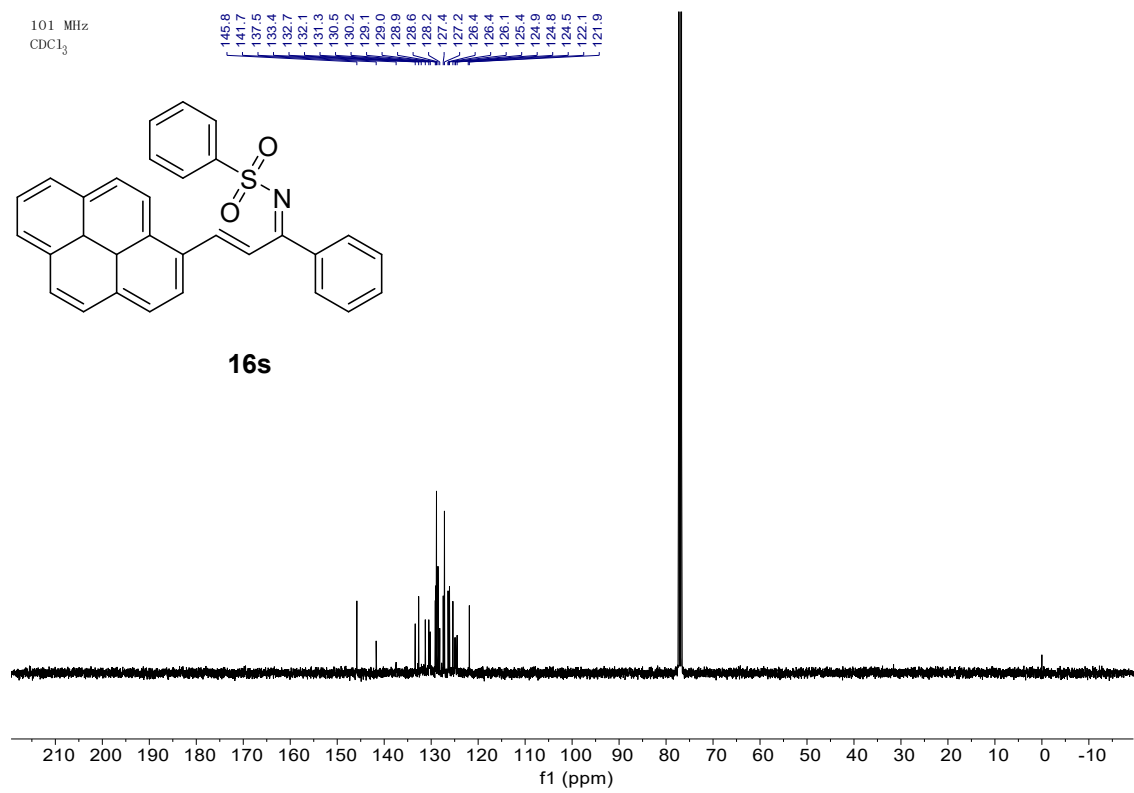

400 MHz  
CDCl<sub>3</sub>

8.04  
8.02  
7.60  
7.56  
7.53  
7.50  
7.46  
7.44  
7.42  
7.26  
7.21  
7.17  
7.08  
7.07  
7.06

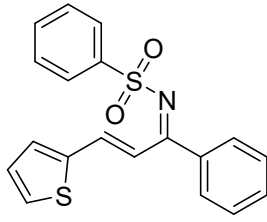

17s

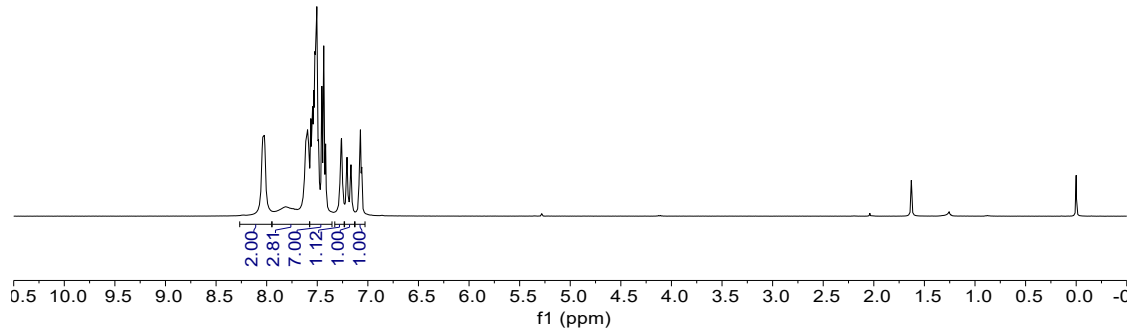

101 MHz  
CDCl<sub>3</sub>

177.6  
141.8  
141.6  
140.0  
132.7  
132.4  
131.8  
131.0  
129.9  
128.6  
128.4  
127.2  
121.5

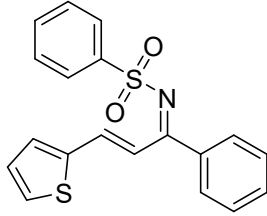

17s

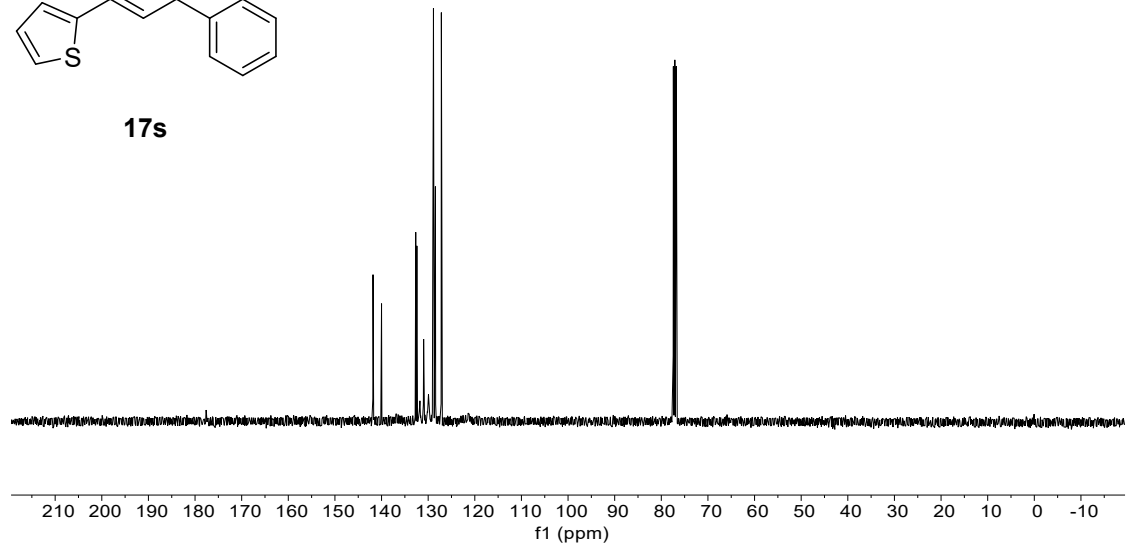

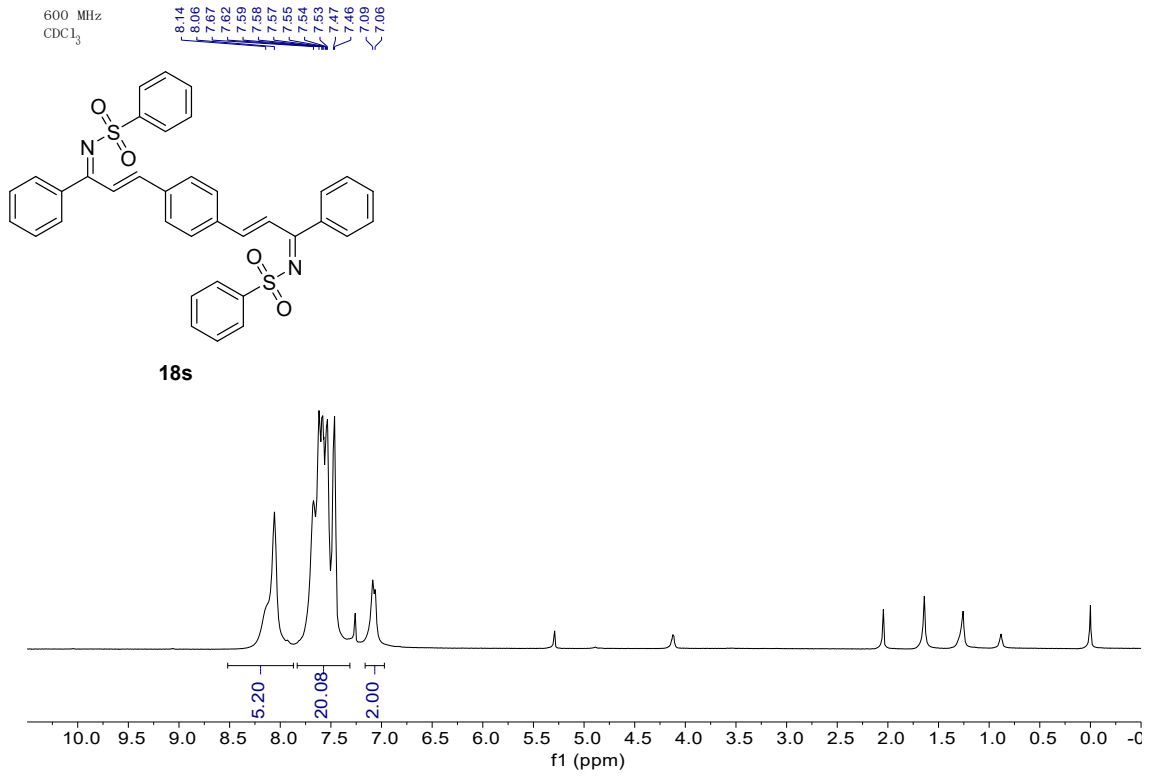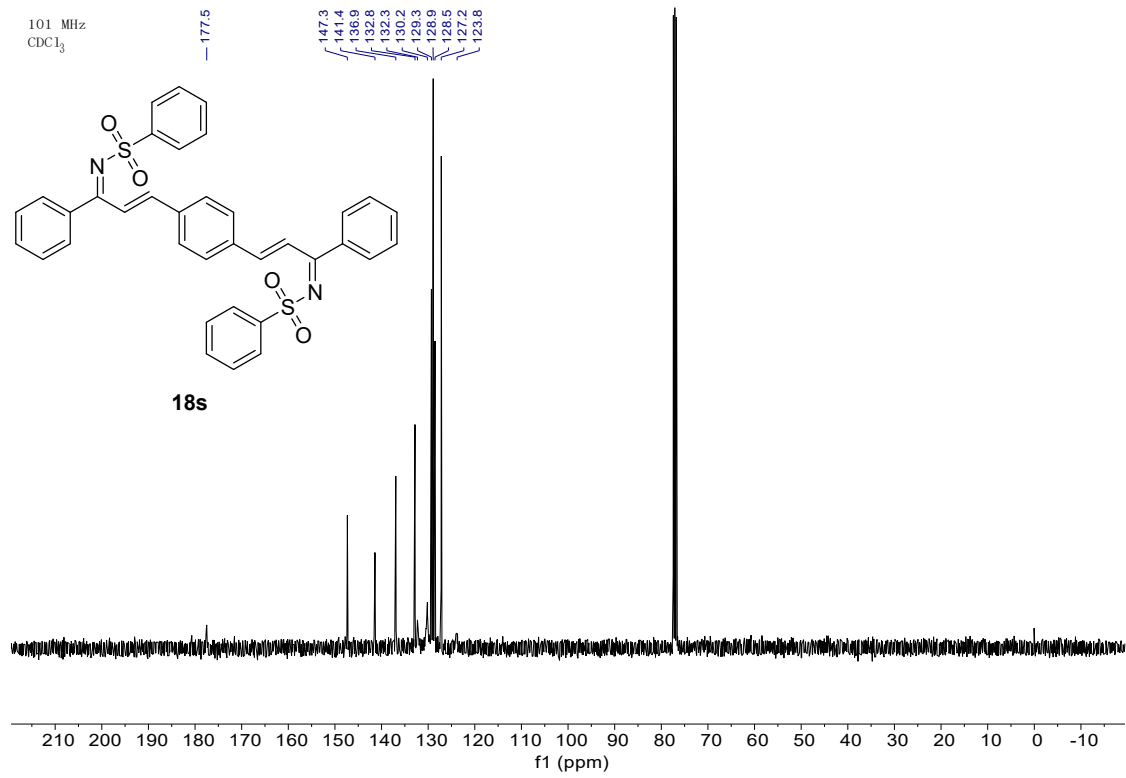

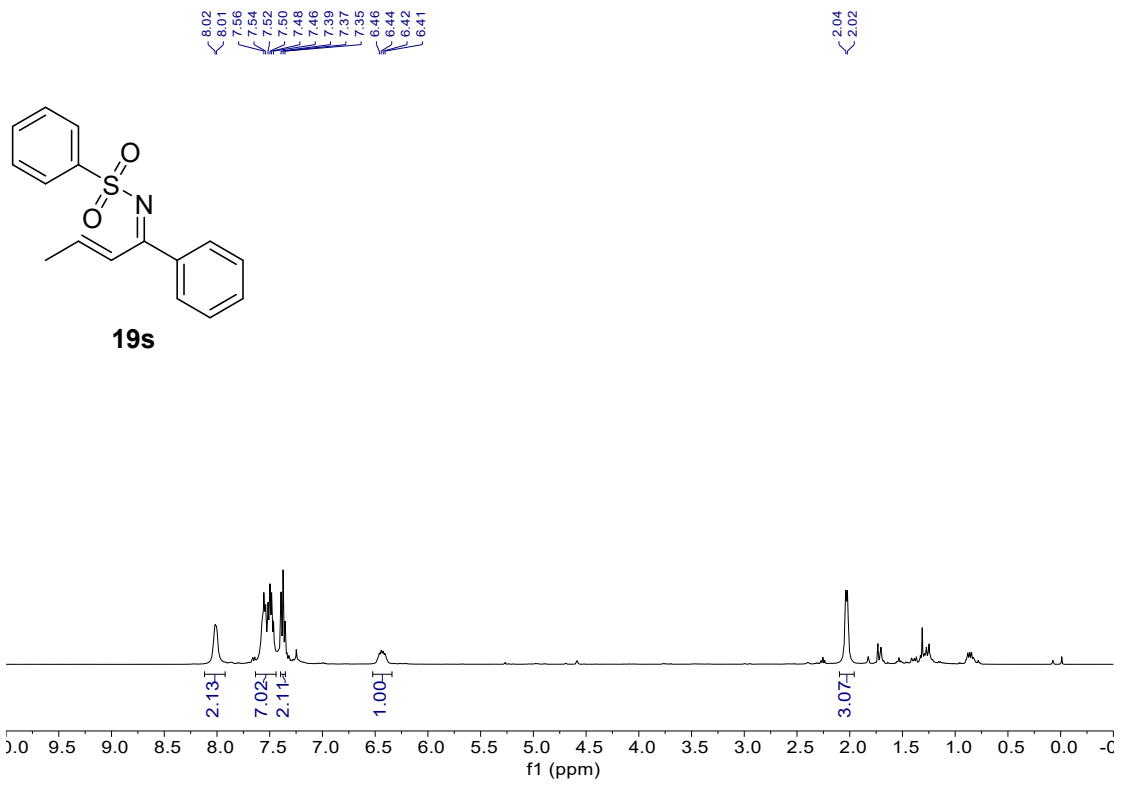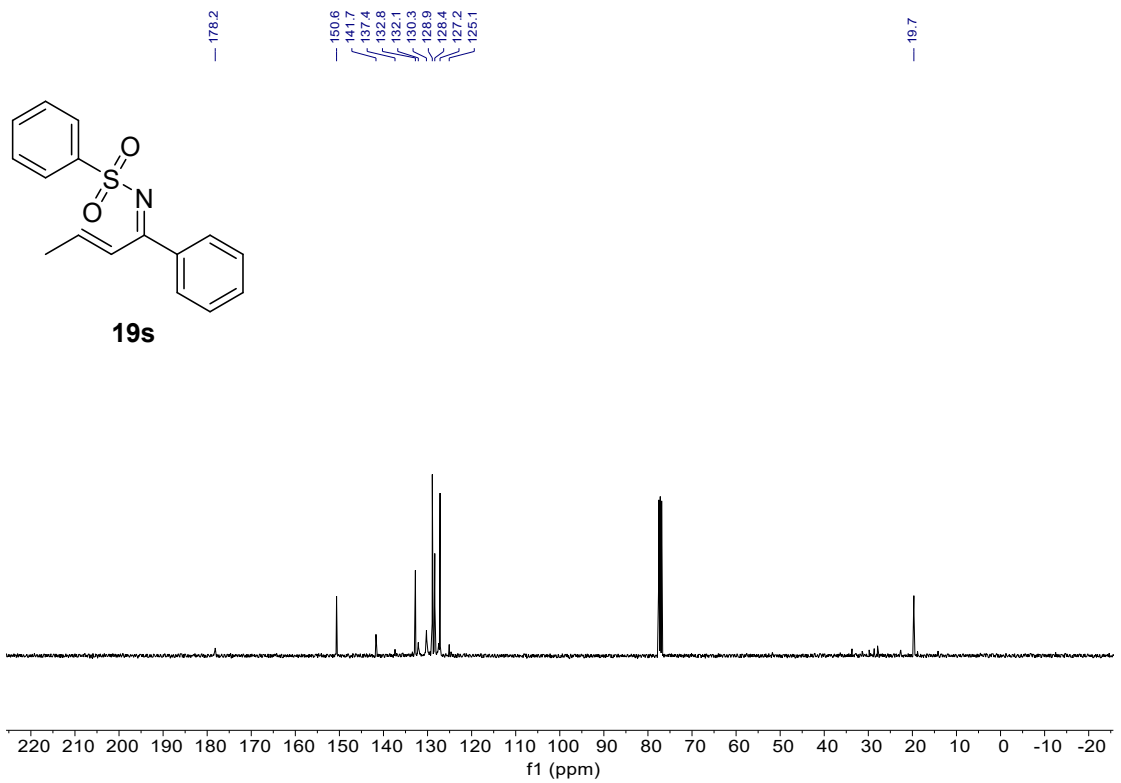



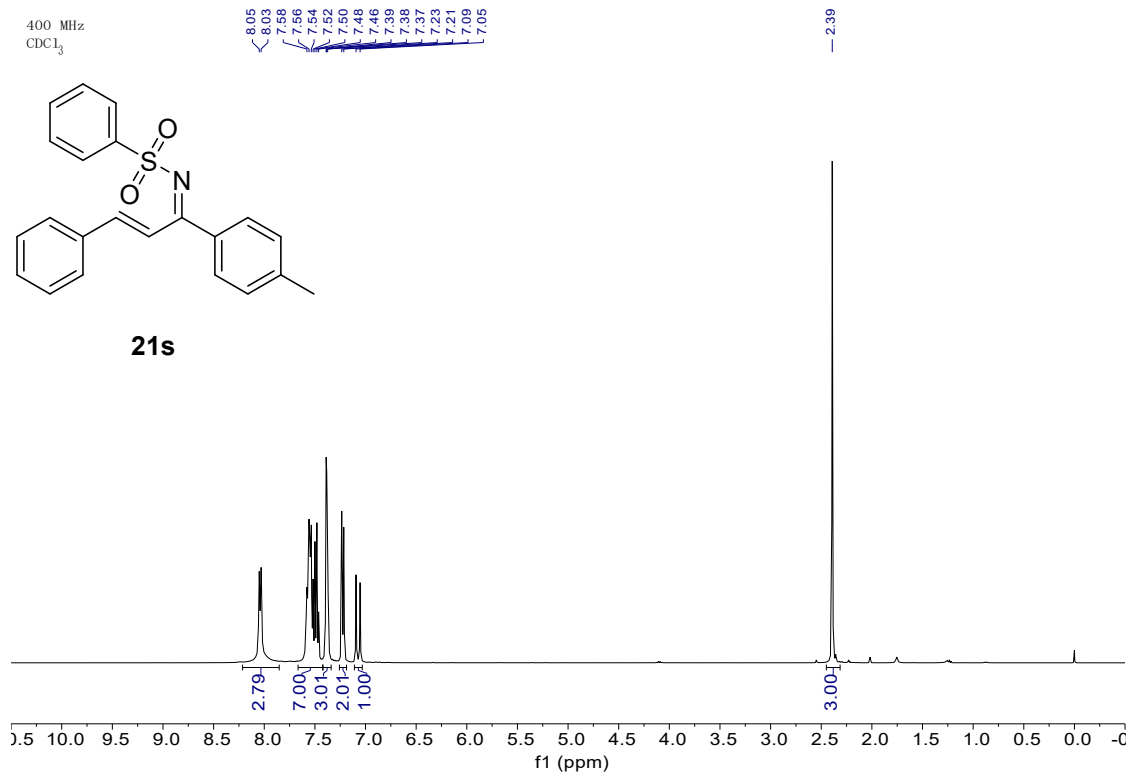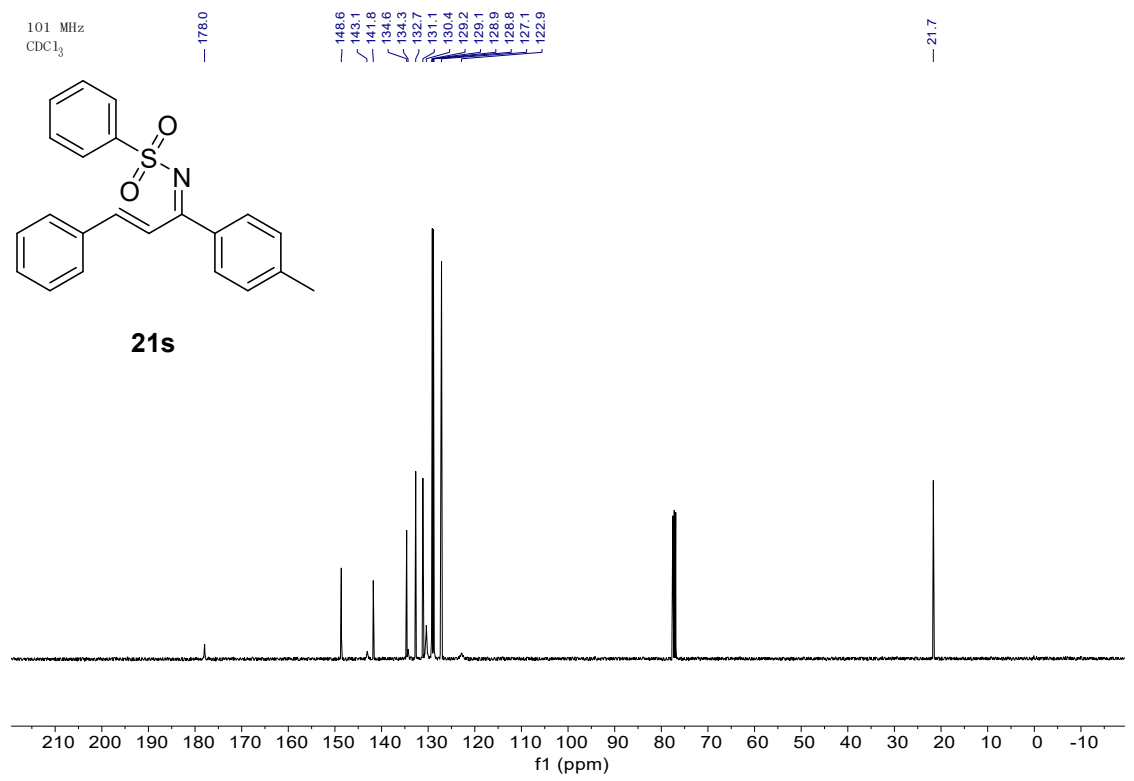

400 MHz  
CDCl<sub>3</sub>

8.12  
8.10  
8.08  
7.98  
7.75  
7.73  
7.67  
7.65  
7.64  
7.62  
7.59  
7.57  
7.55  
7.53  
7.51  
7.49  
7.47  
7.46  
7.44  
7.43  
7.42  
7.40  
7.38  
7.18  
7.14

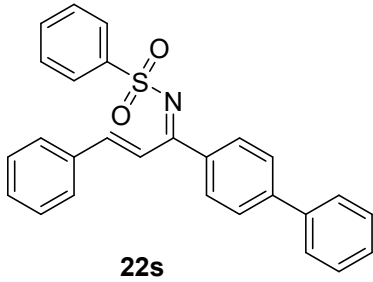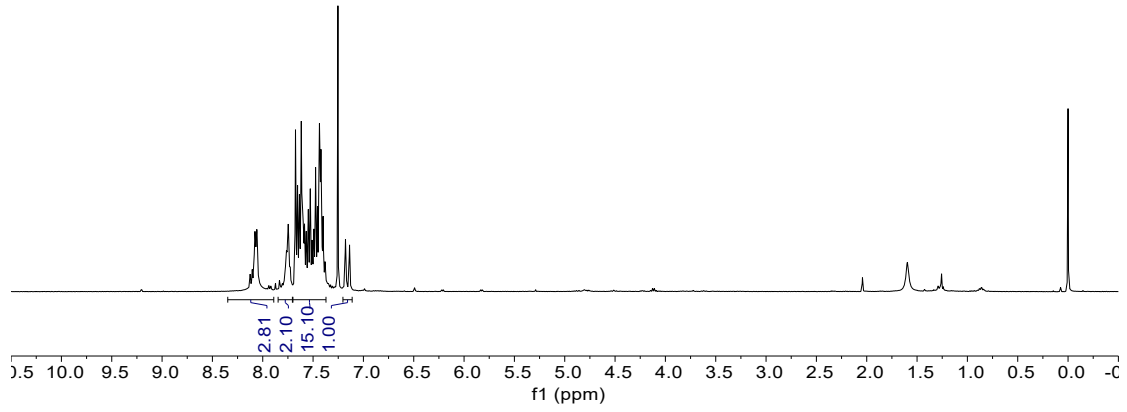

101 MHz  
CDCl<sub>3</sub>

177.6  
148.9  
145.1  
141.7  
139.8  
135.9  
134.6  
132.8  
131.3  
130.9  
129.2  
128.1  
128.0  
128.9  
128.3  
127.3  
127.2  
127.1  
122.6

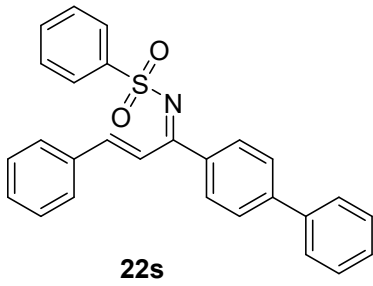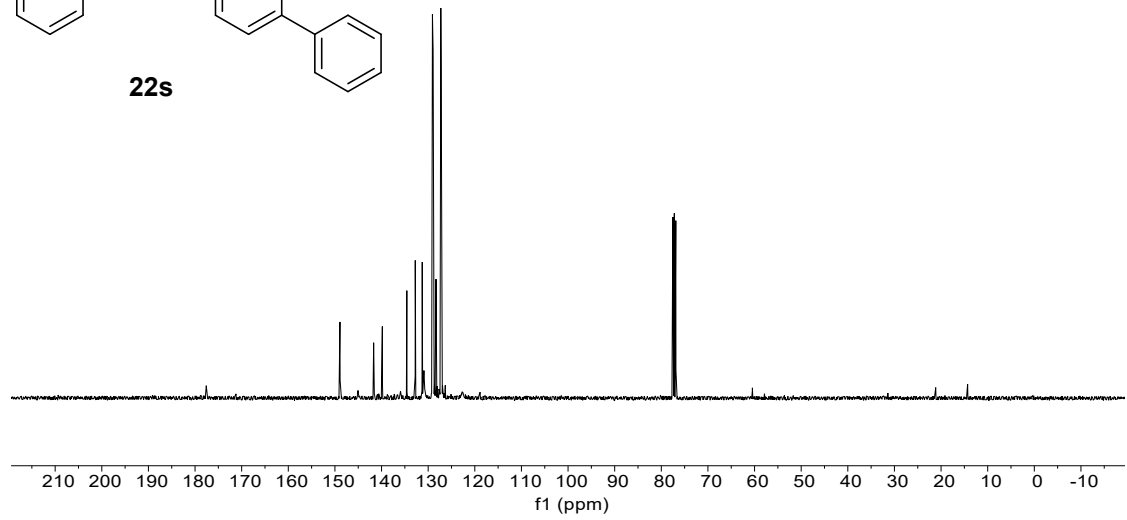

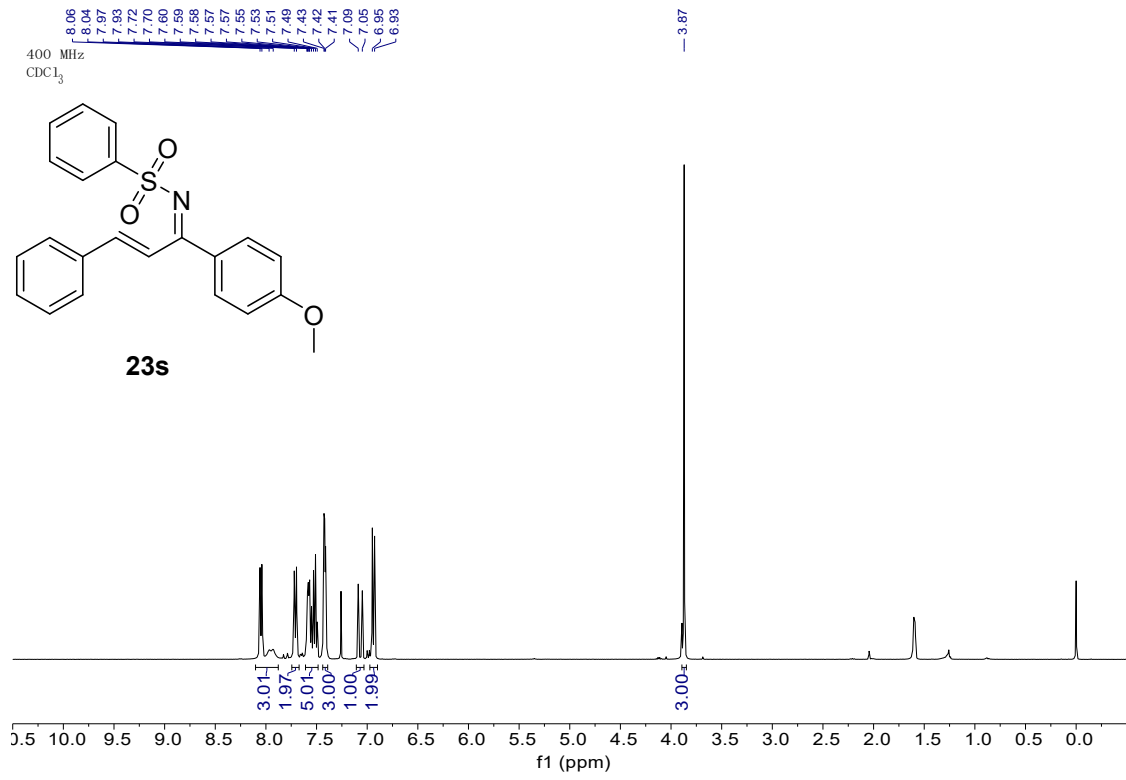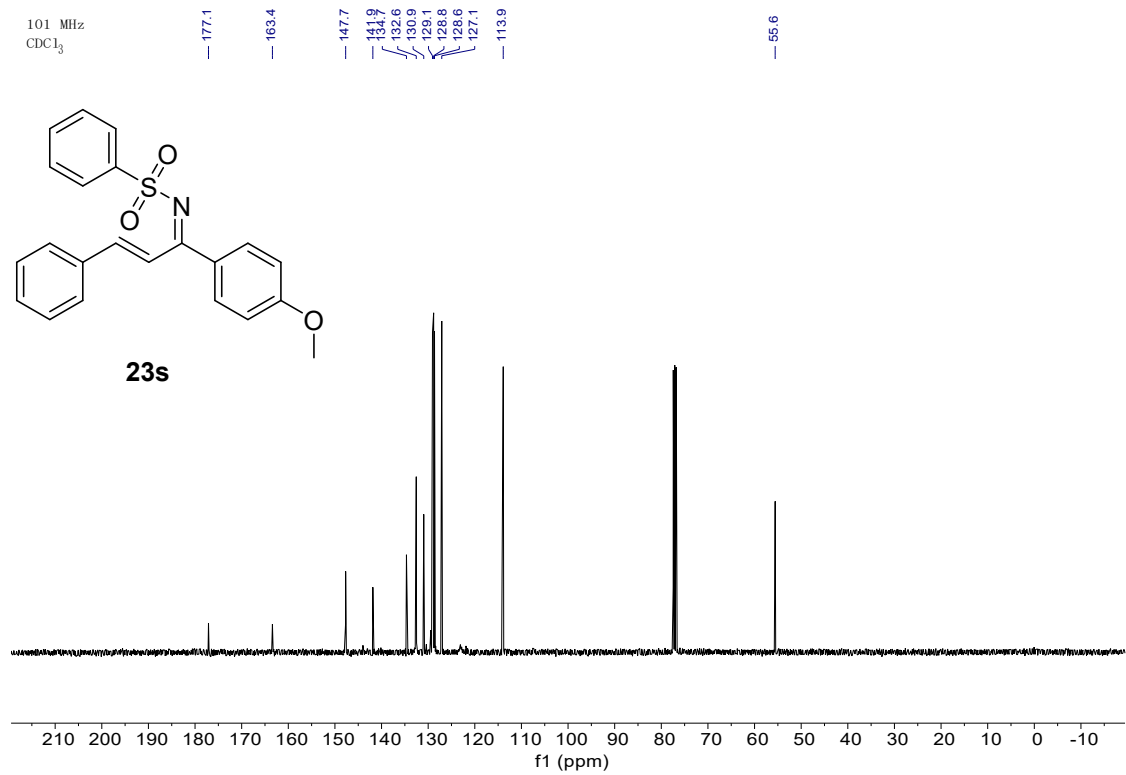

400 MHz  
CDCl<sub>3</sub>

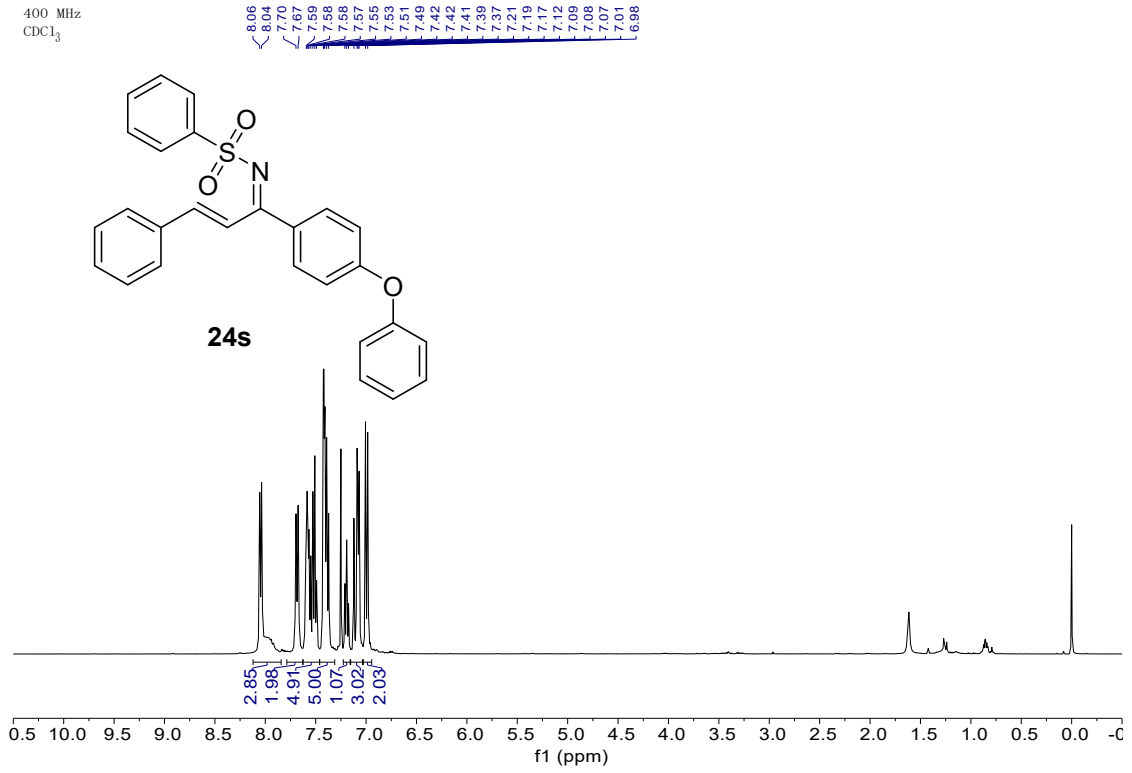

101 MHz  
CDCl<sub>3</sub>

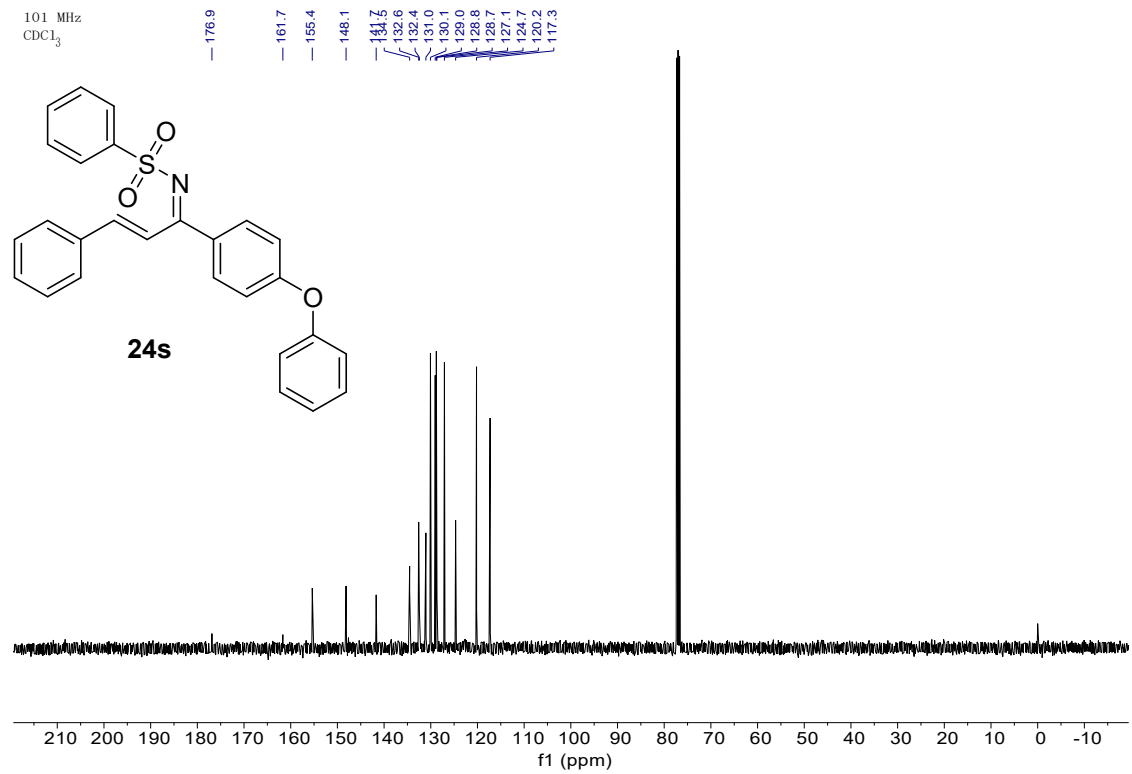

400 M  
CDCl<sub>3</sub>

8.05  
8.03  
7.69  
7.67  
7.54  
7.52  
7.51  
7.43  
7.42  
7.15  
7.13  
7.11  
7.08  
7.04

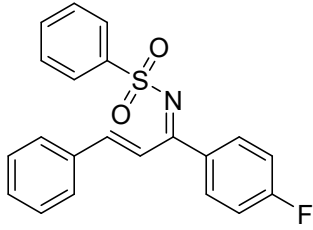

**25s**

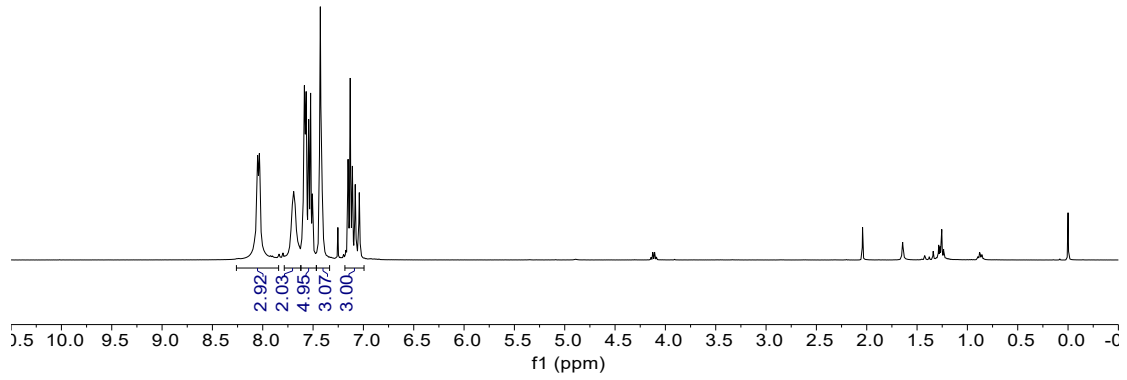

151 M  
CDCl<sub>3</sub>

176.5  
166.1  
164.5  
148.8  
141.4  
134.3  
132.8  
132.7  
131.3  
129.1  
128.0  
128.8  
127.6  
127.1  
122.4  
115.7  
115.6

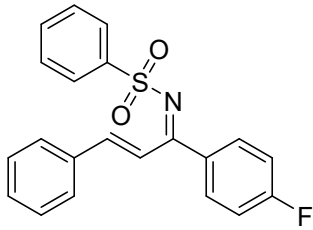

**25s**

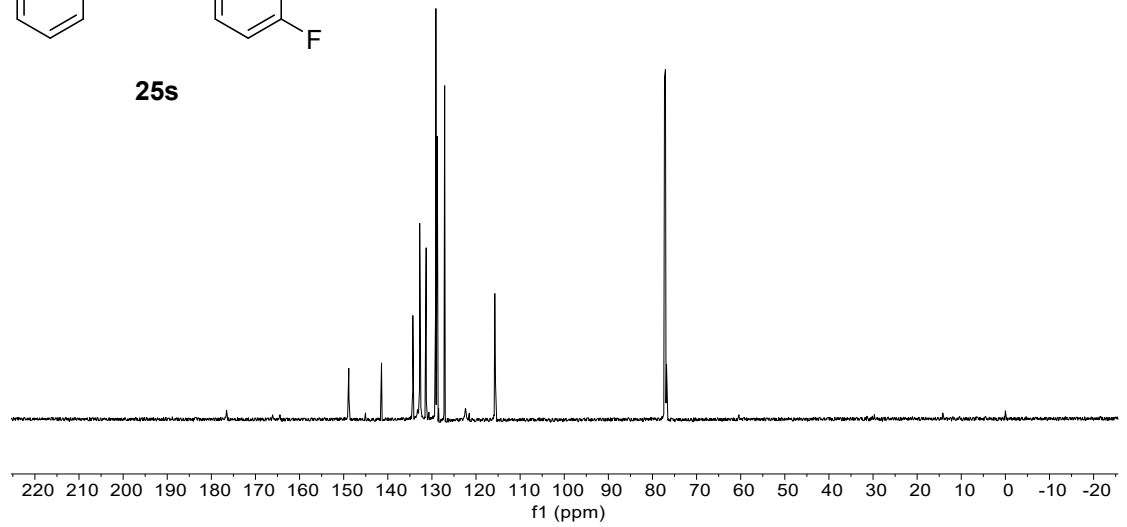

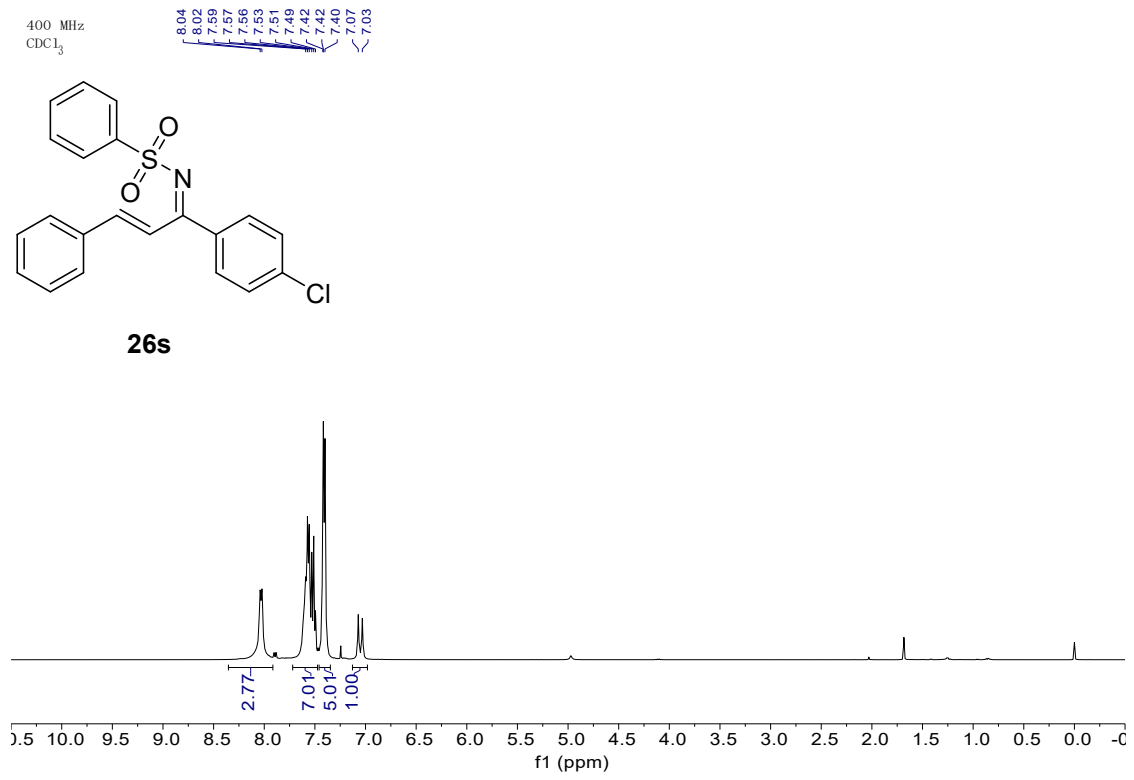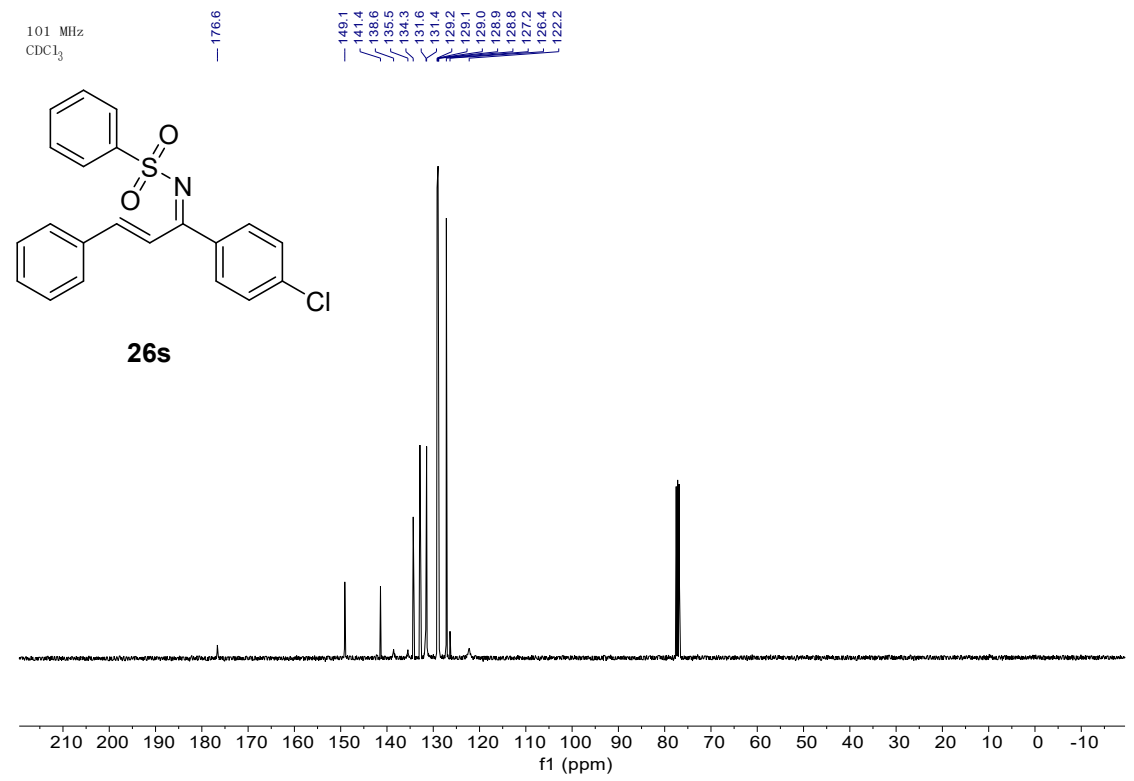

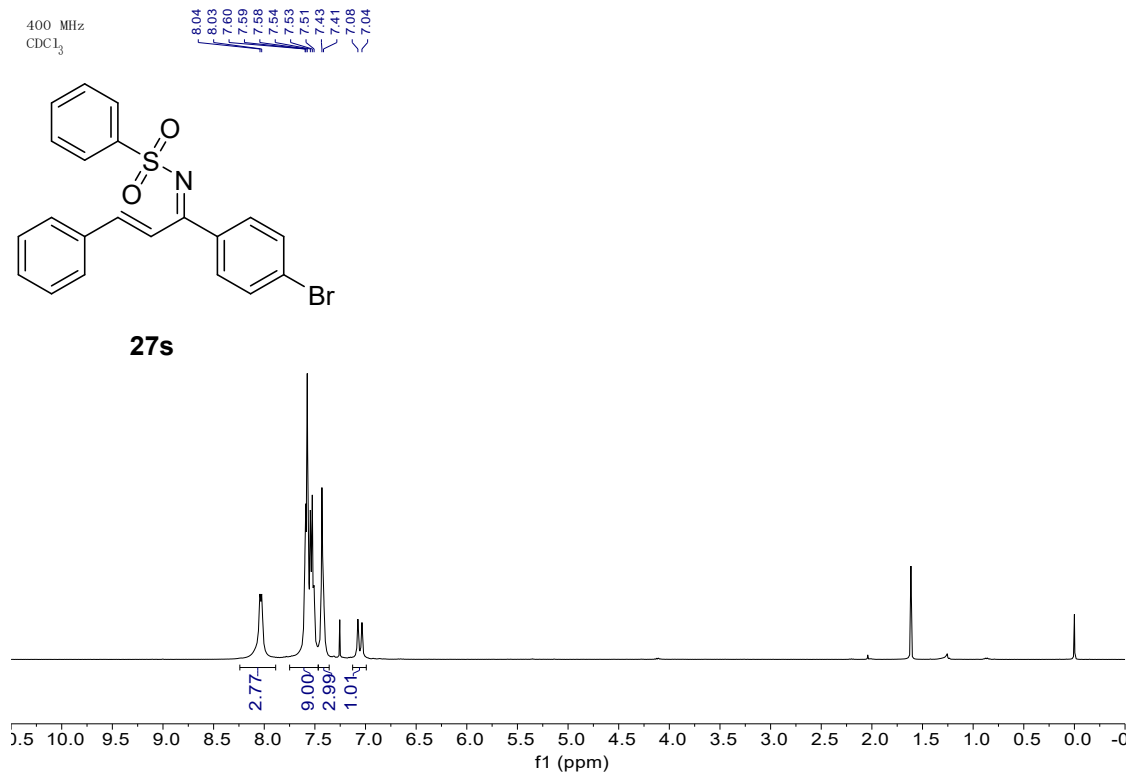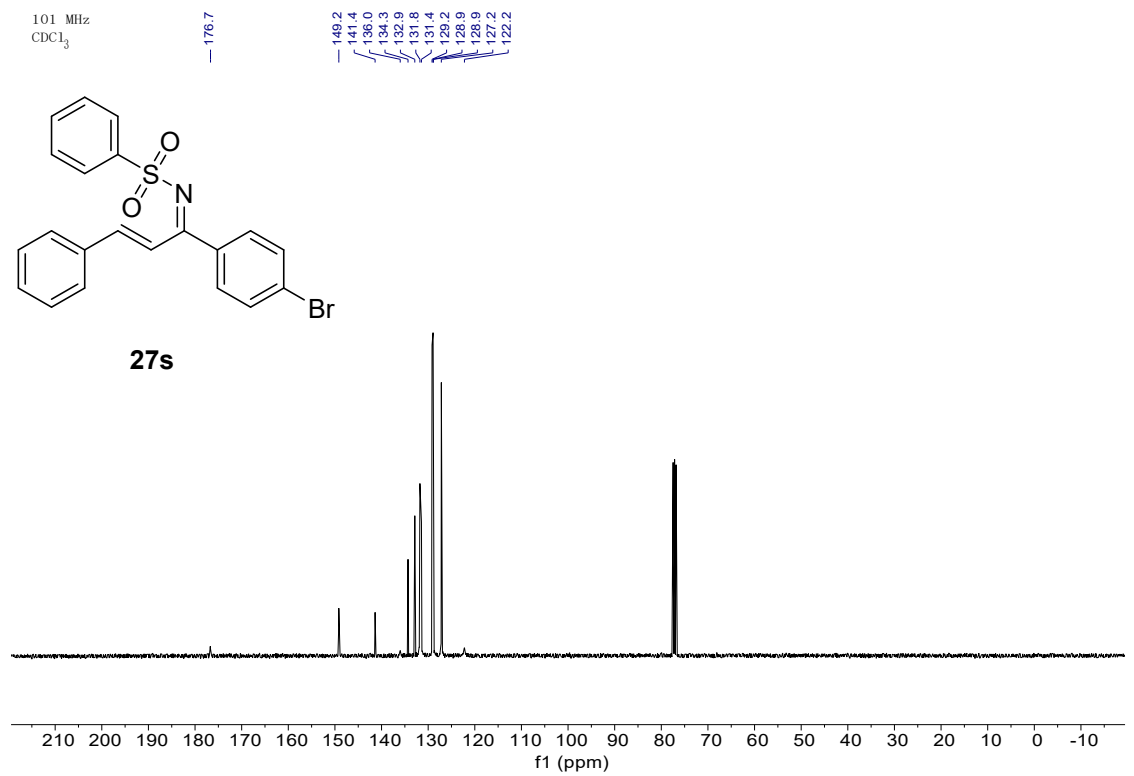

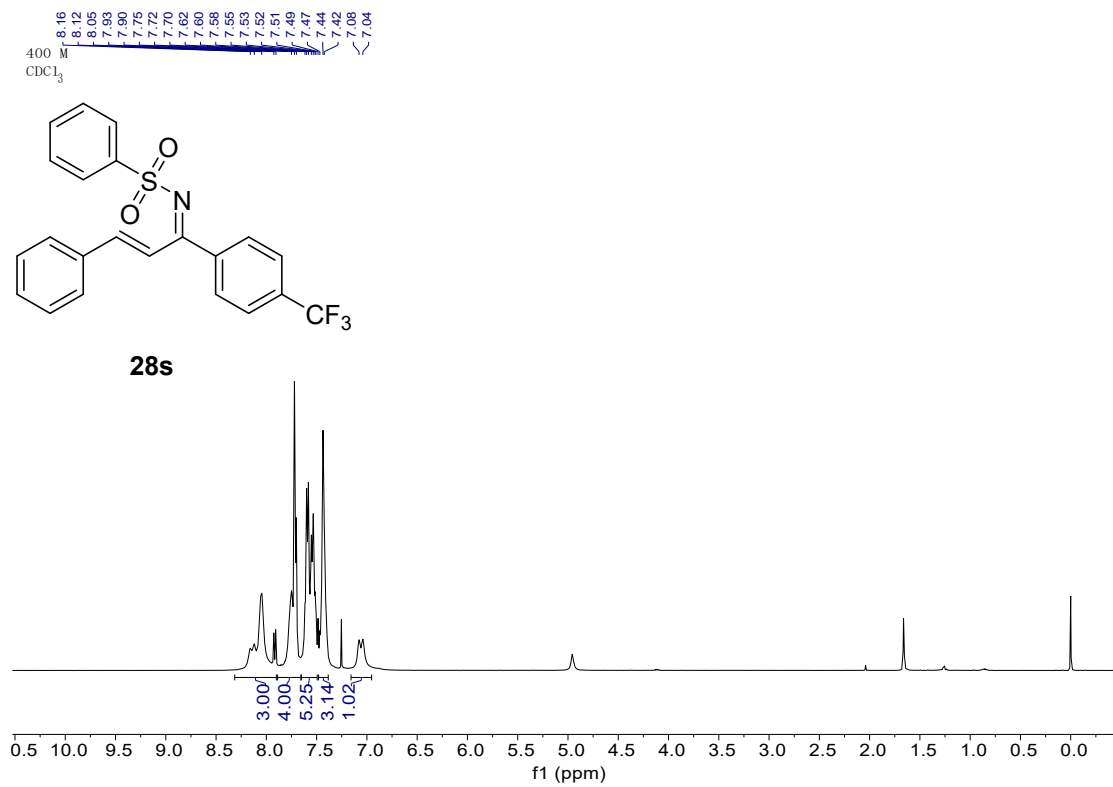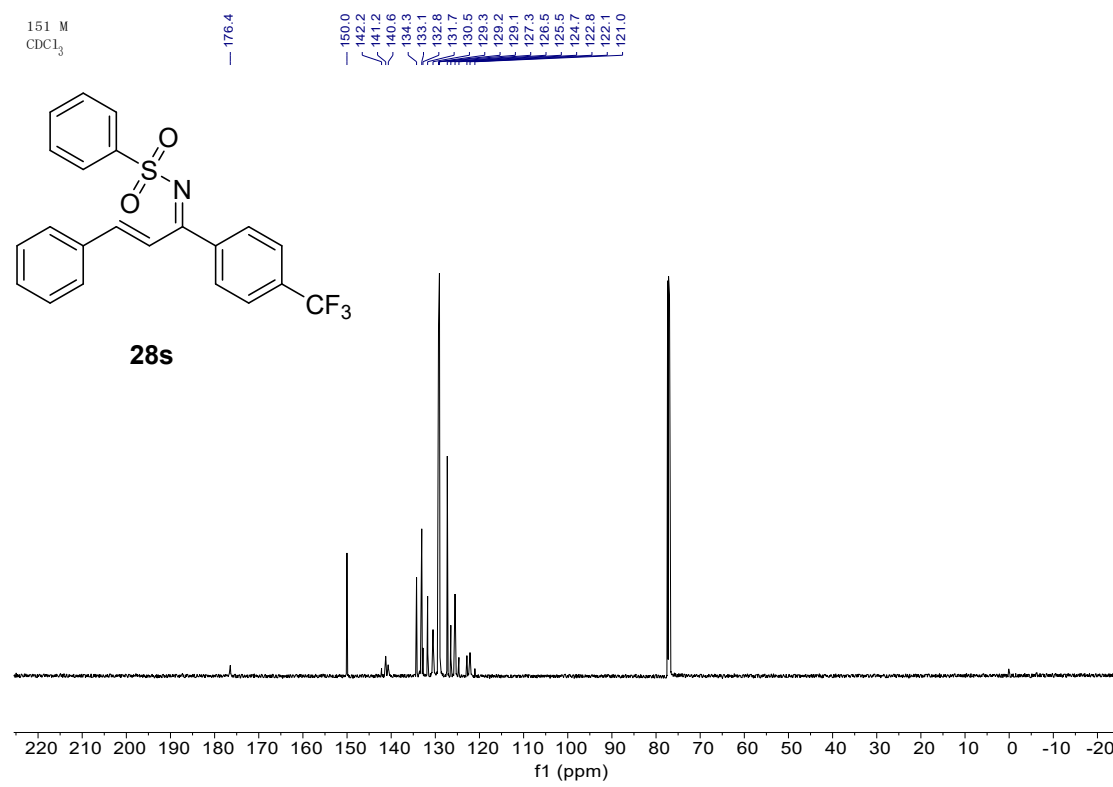



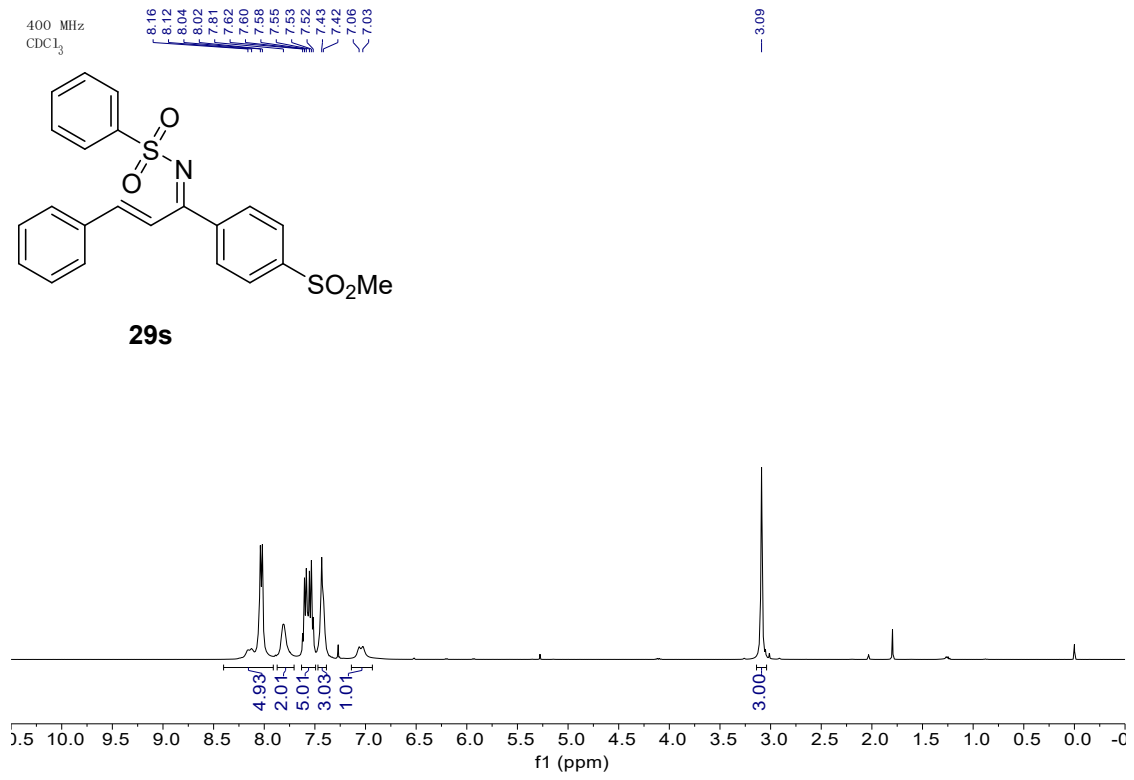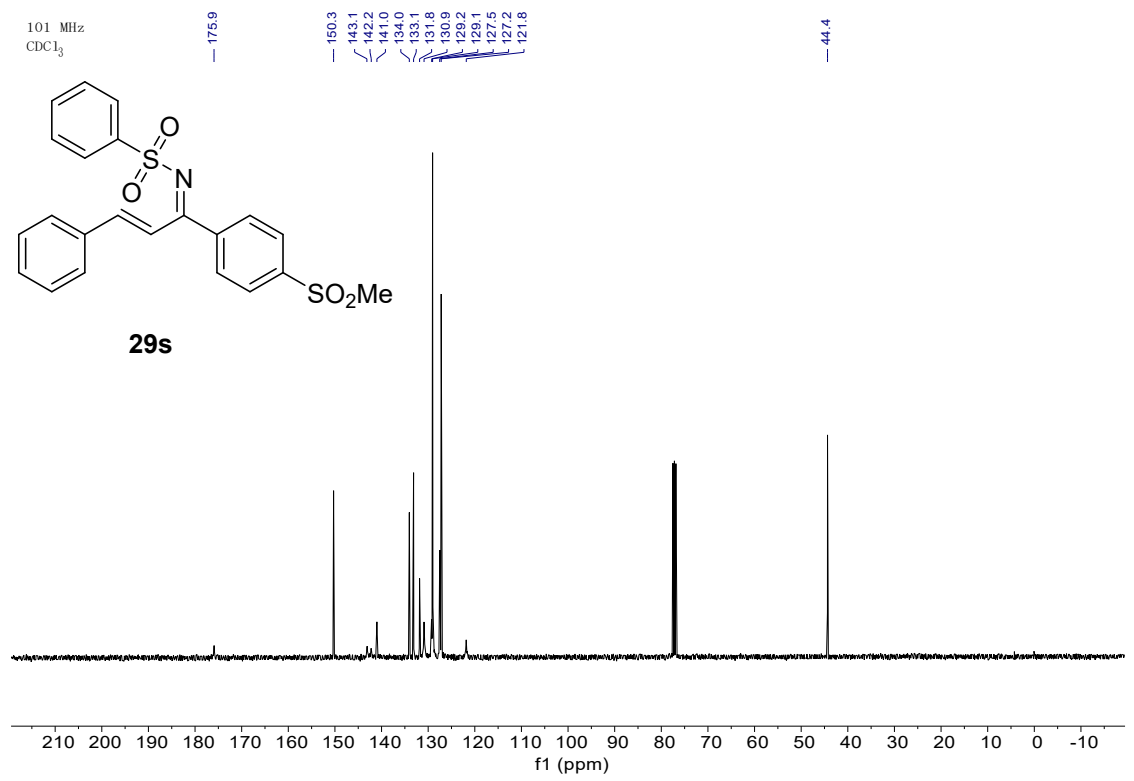

400 MHz  
CDCl<sub>3</sub>

8.05  
8.03  
7.61  
7.60  
7.58  
7.55  
7.51  
7.43  
7.42  
7.40  
7.38  
7.36  
7.09  
7.05

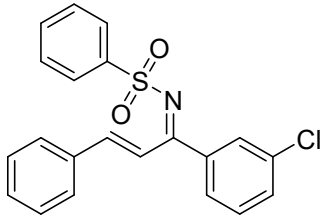

**30s**

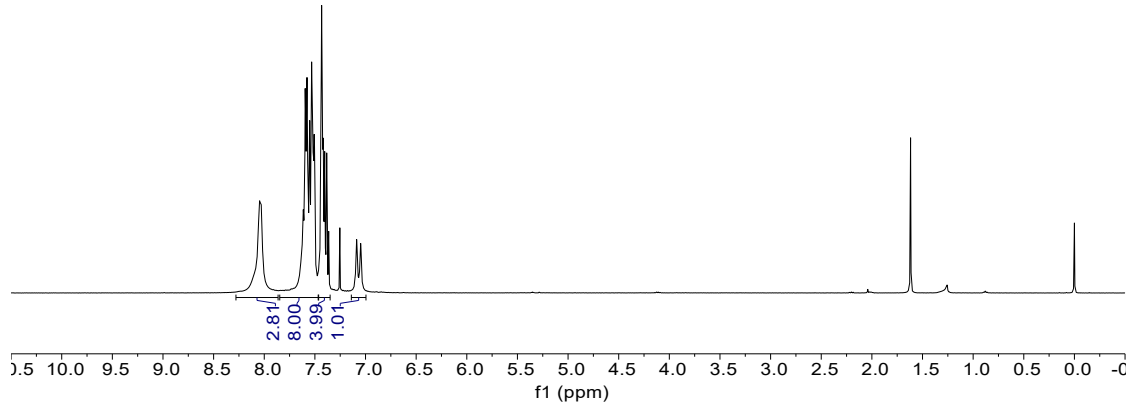

101 MHz  
CDCl<sub>3</sub>

176.3  
148.5  
141.3  
138.8  
134.6  
134.3  
132.9  
131.9  
131.5  
128.7  
128.0  
128.9  
127.3  
122.2

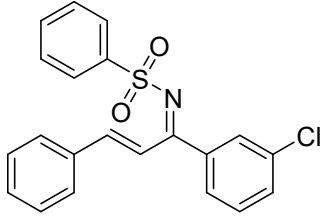

**30s**

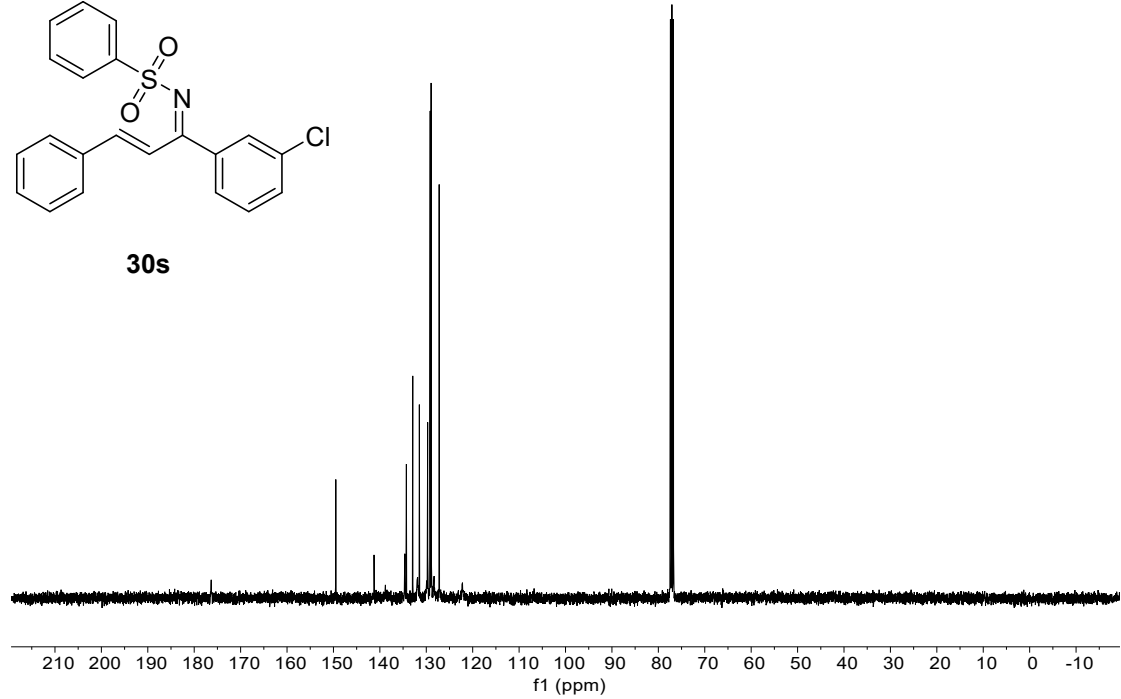

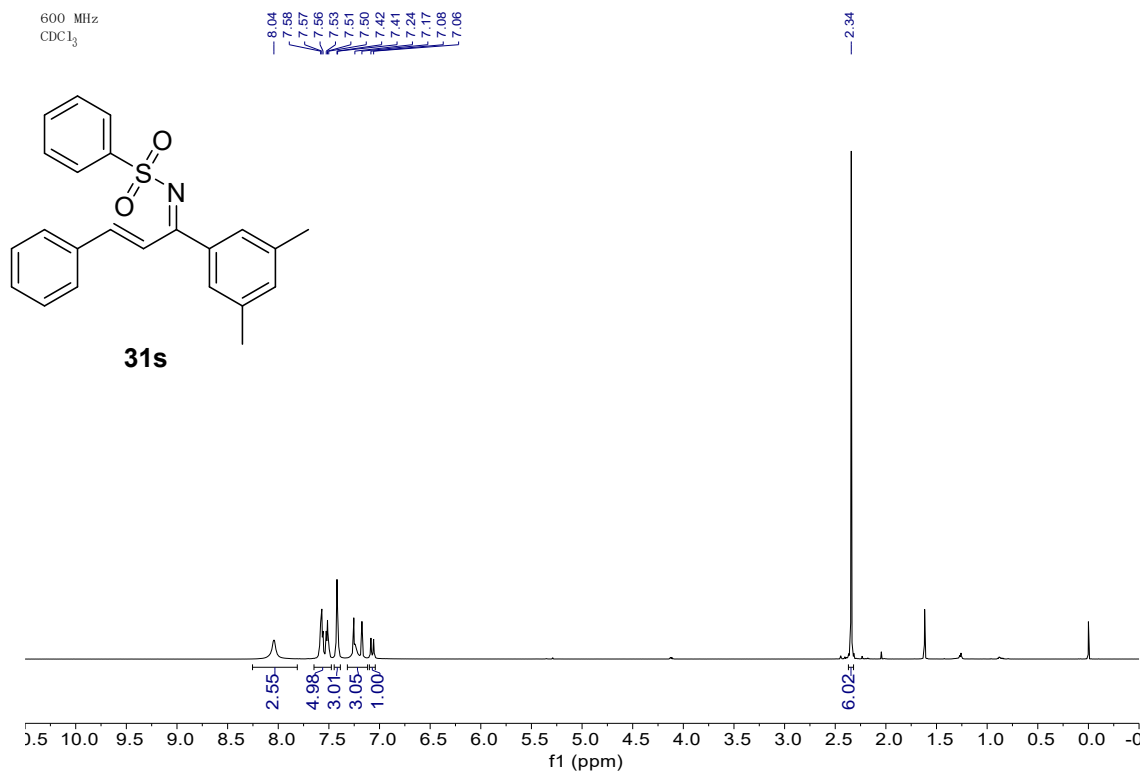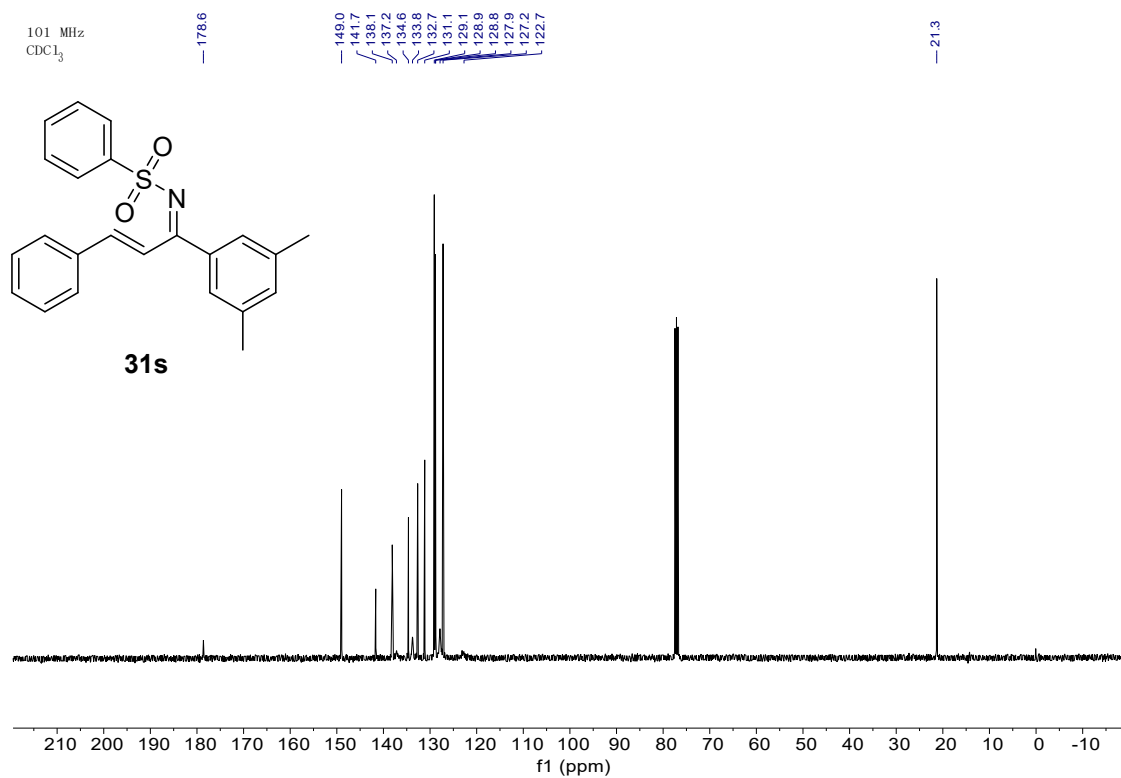

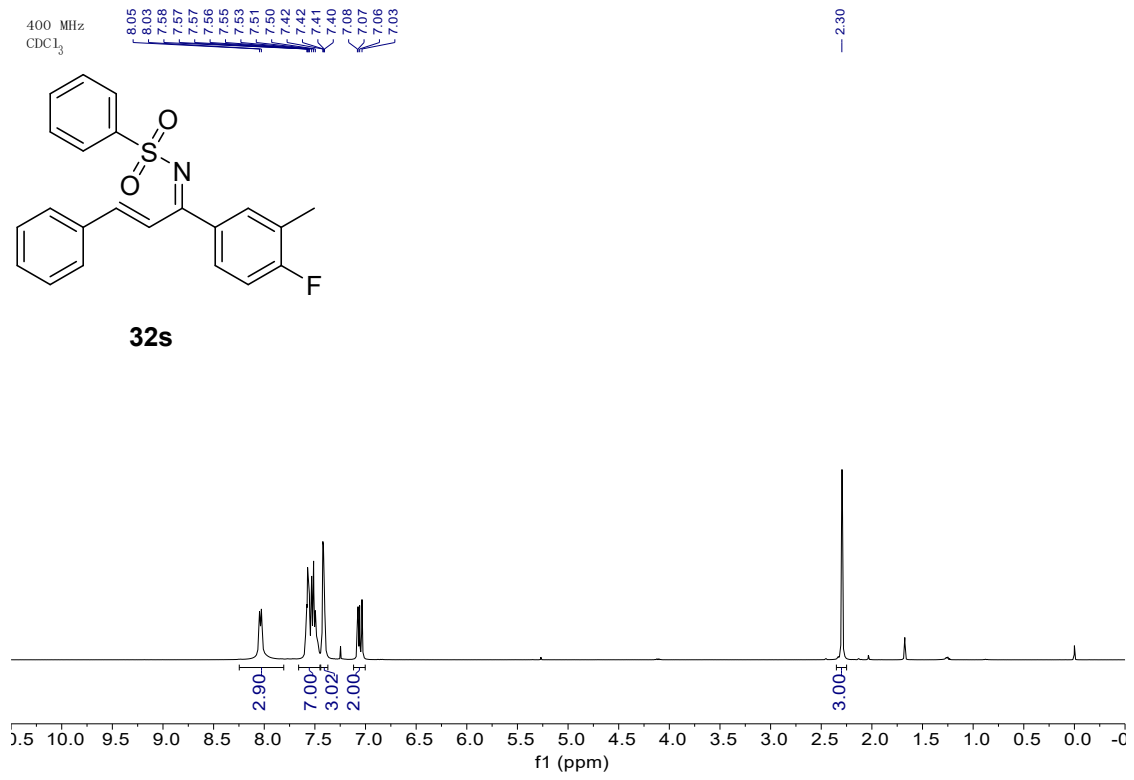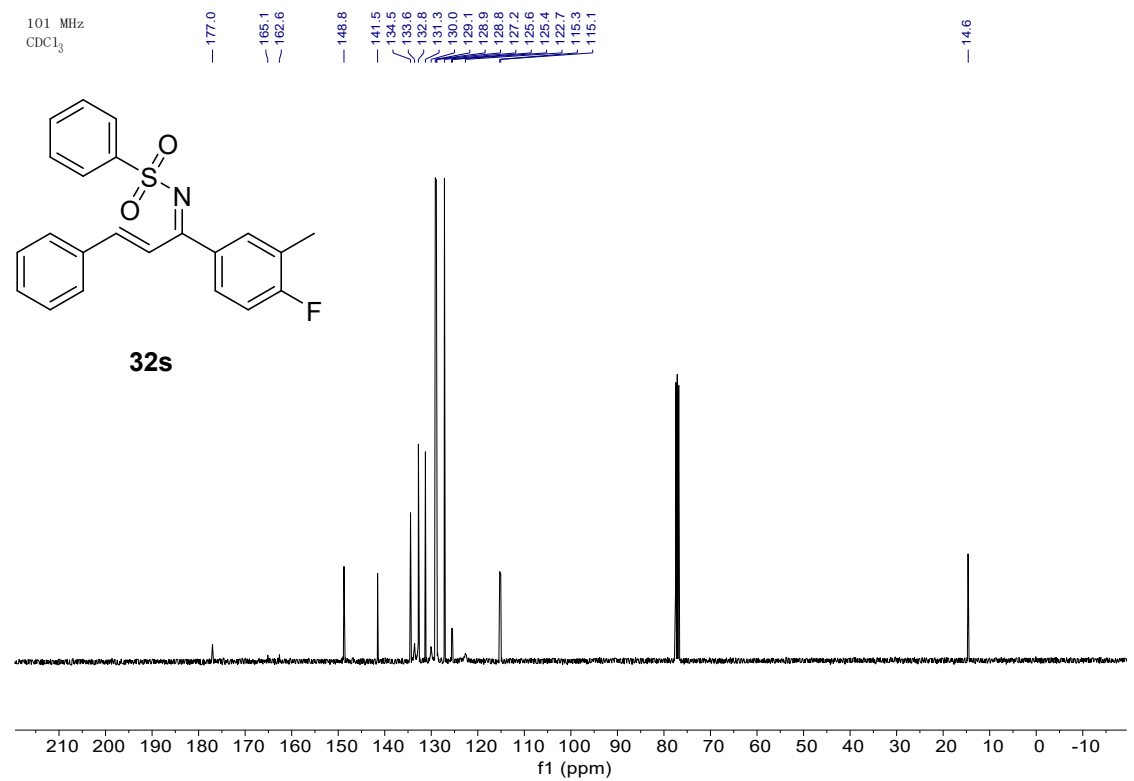

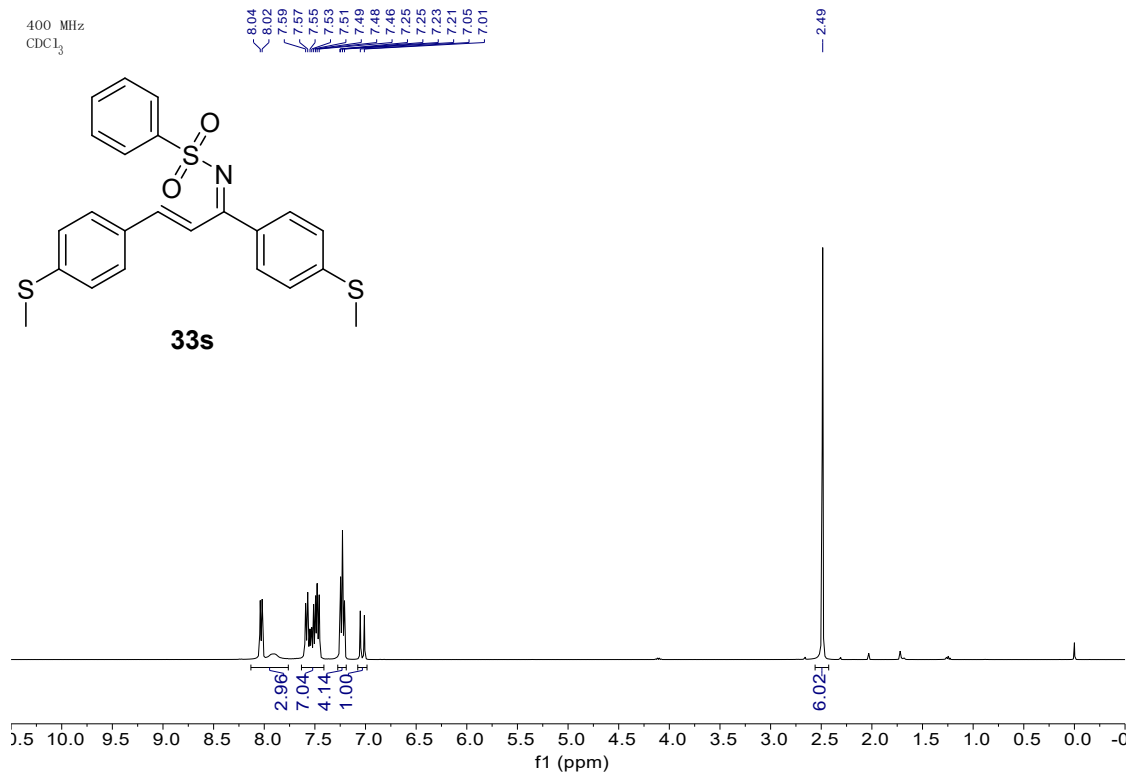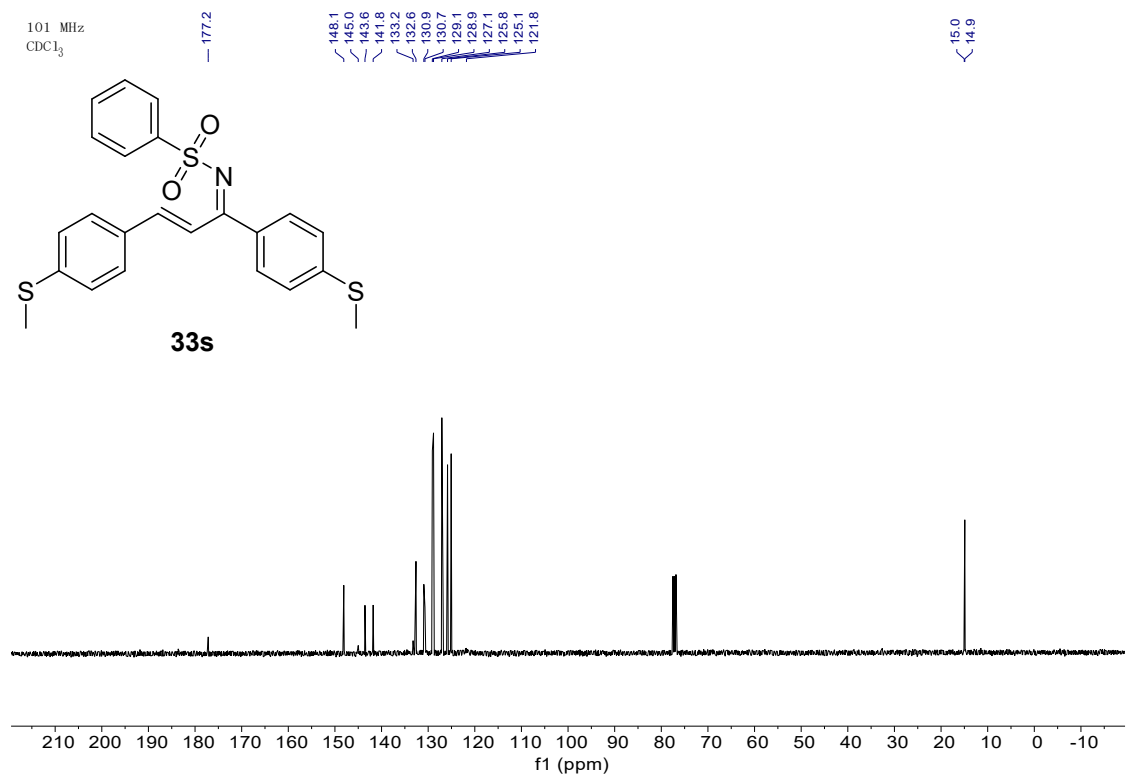

400 MHz  
CDCl<sub>3</sub>

8.20  
8.15  
8.10  
8.09  
8.06  
7.91  
7.89  
7.87  
7.85  
7.83  
7.82  
7.79  
7.76  
7.60  
7.57  
7.55  
7.53  
7.51  
7.49  
7.47  
7.31  
7.27

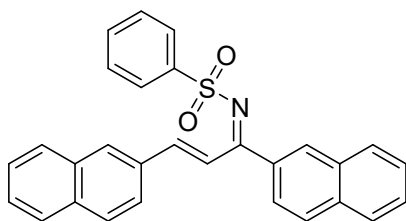

**34s**

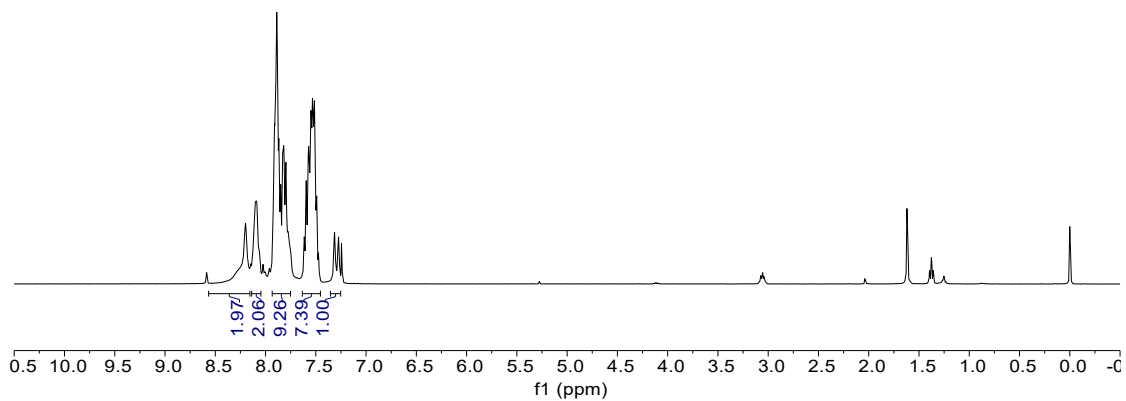

101 MHz  
CDCl<sub>3</sub>

176.0  
149.3  
144.9  
141.6  
134.9  
134.6  
133.2  
132.7  
132.4  
132.1  
131.1  
129.2  
129.0  
128.9  
128.7  
128.3  
126.2  
125.8  
125.7  
125.6  
126.9  
123.8  
122.9

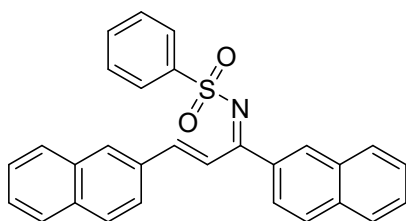

**34s**

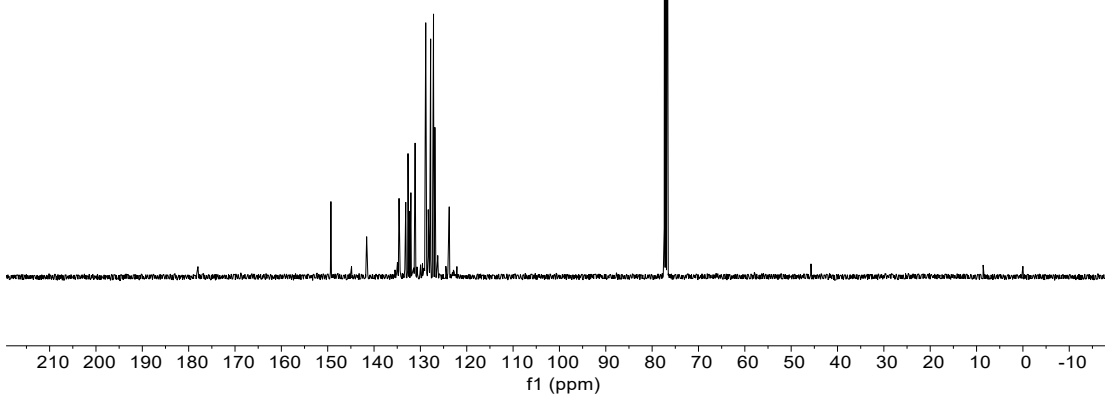

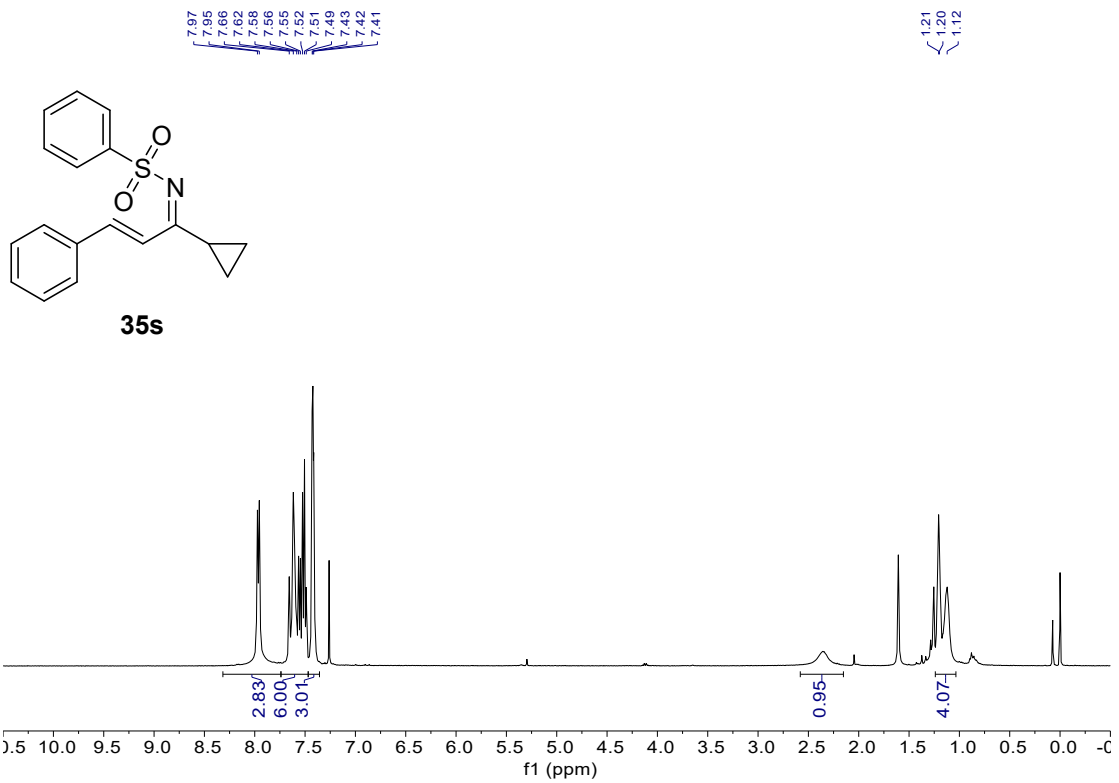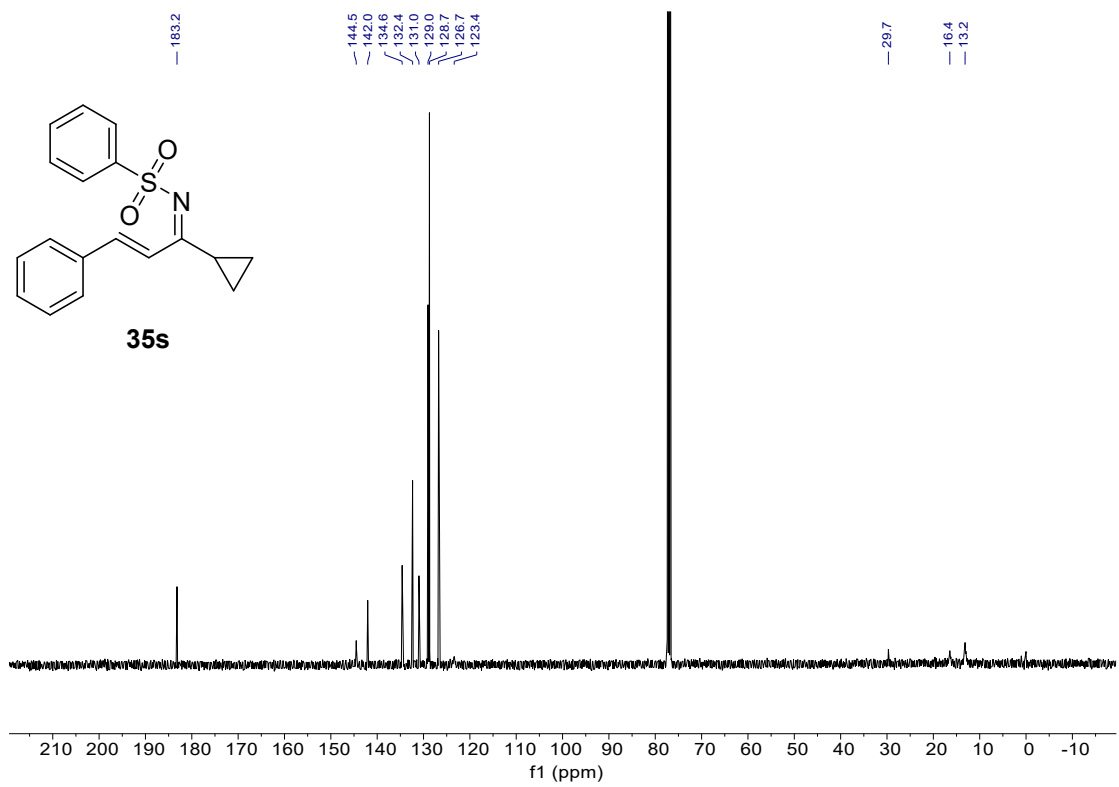

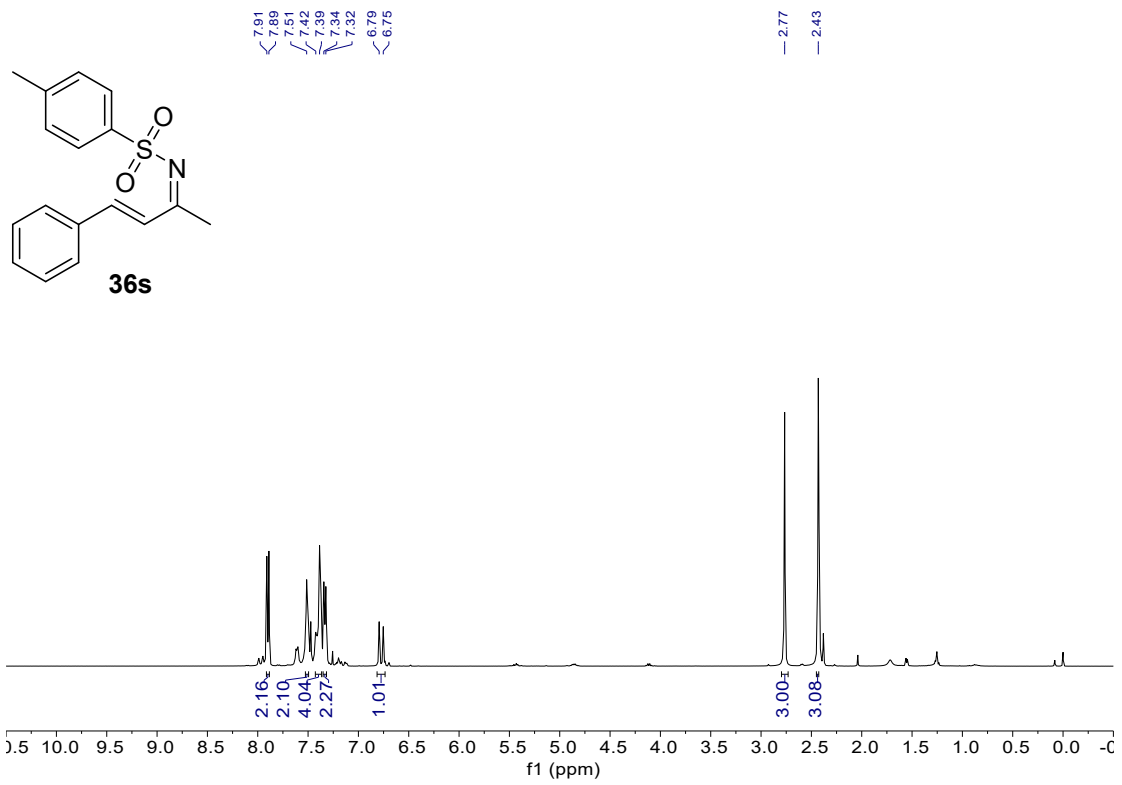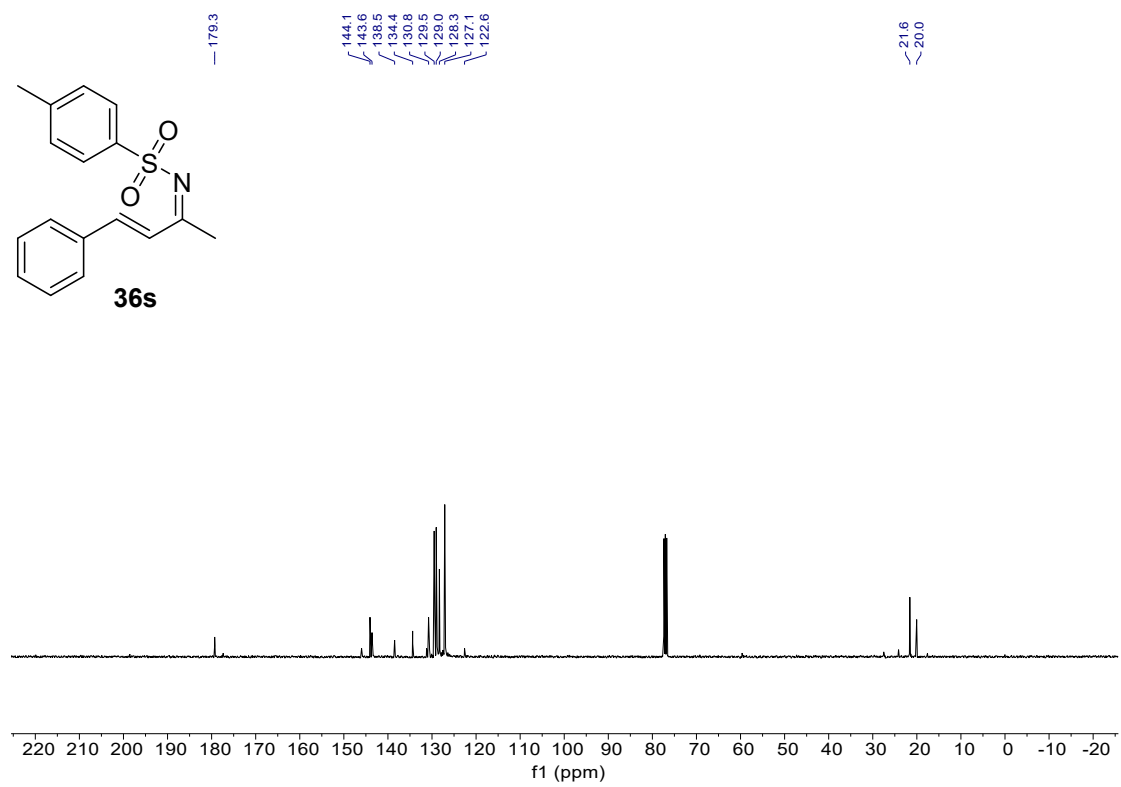



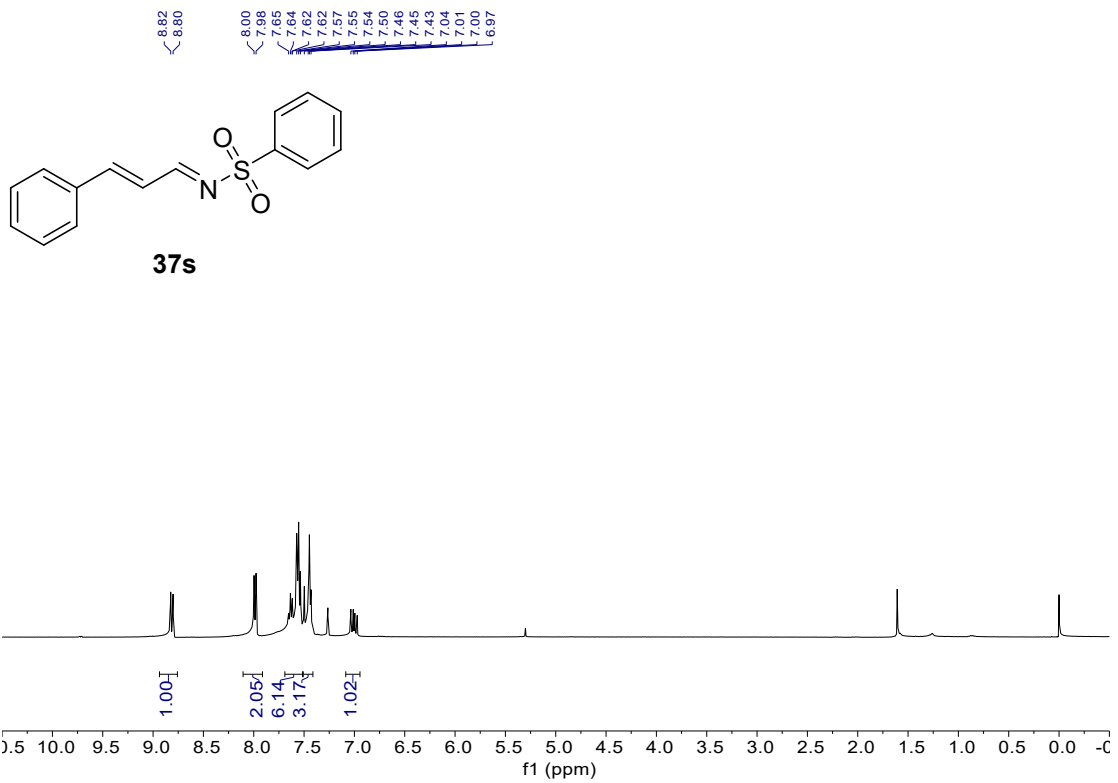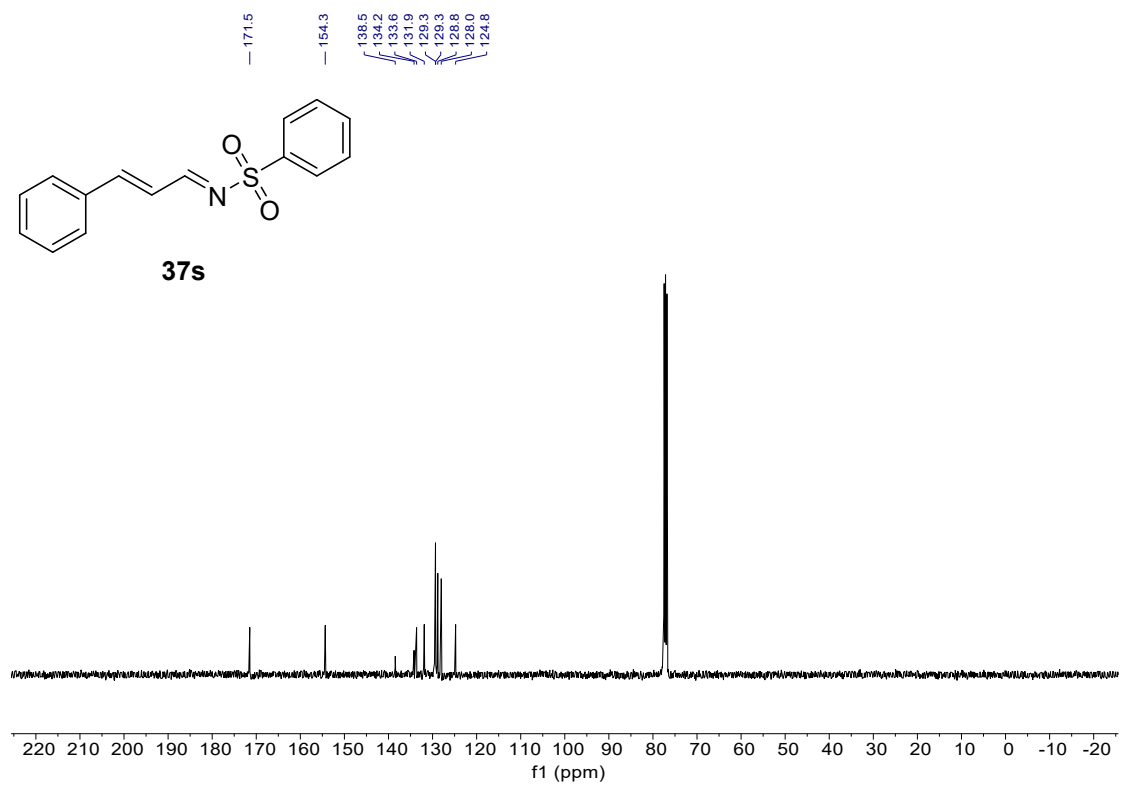

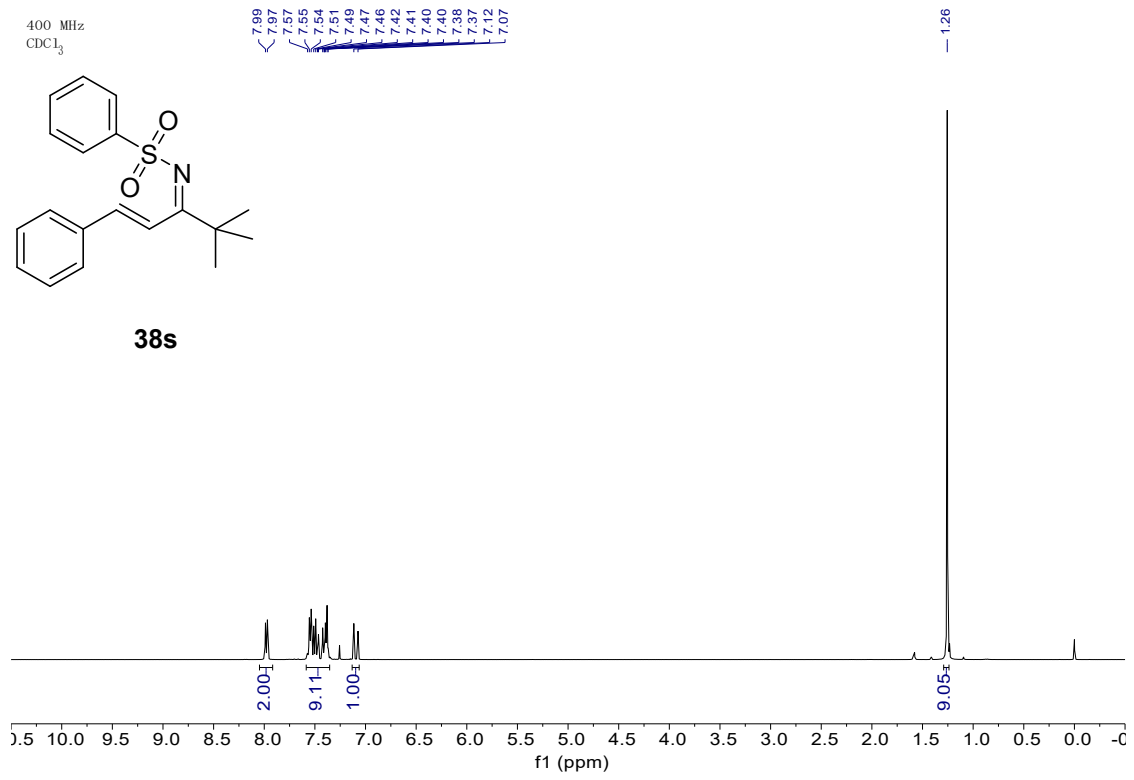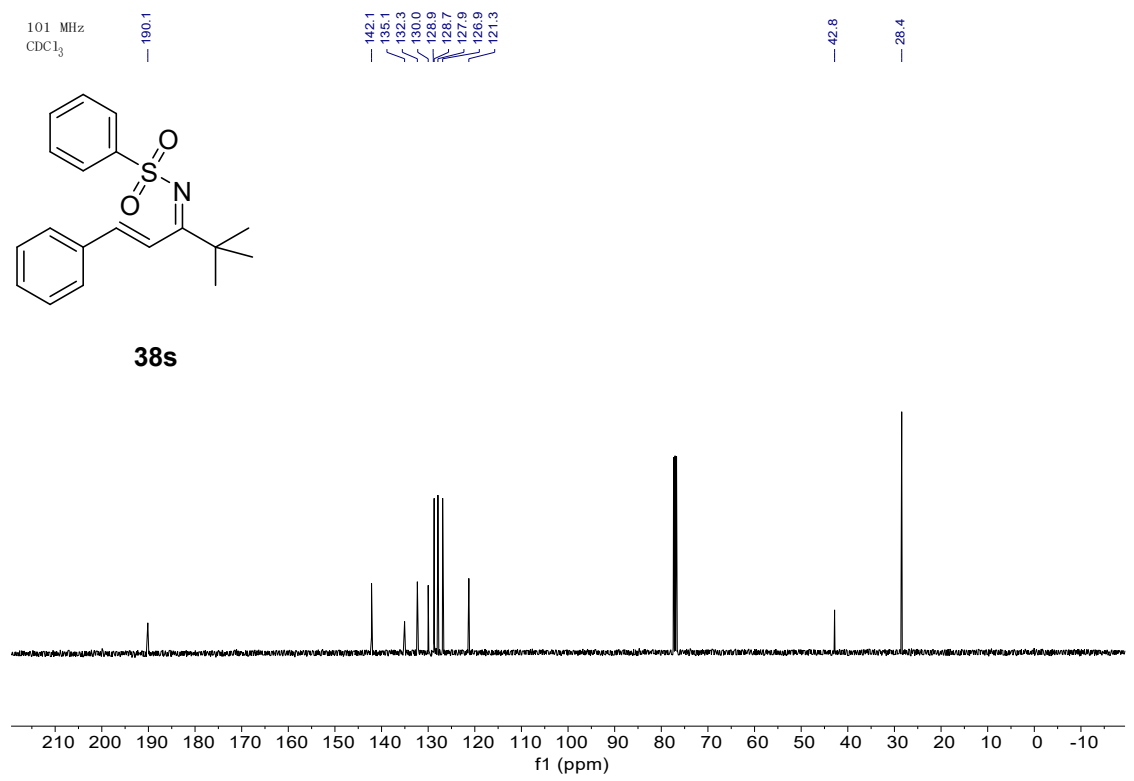

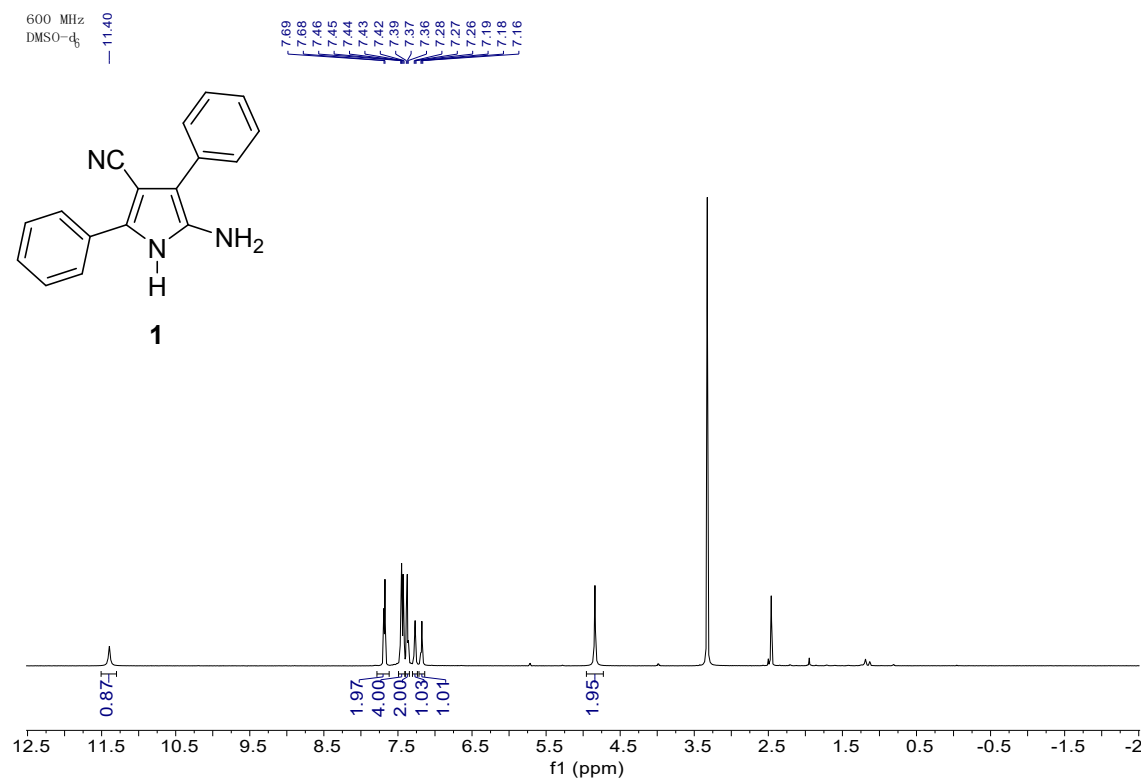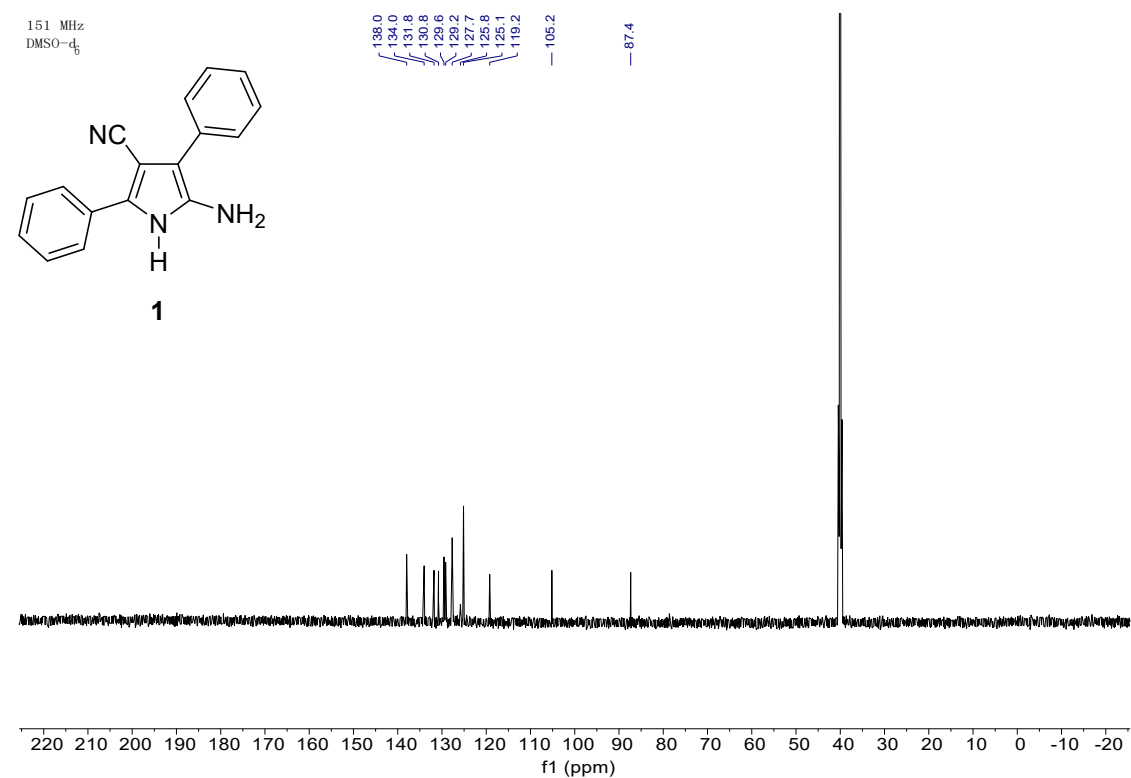

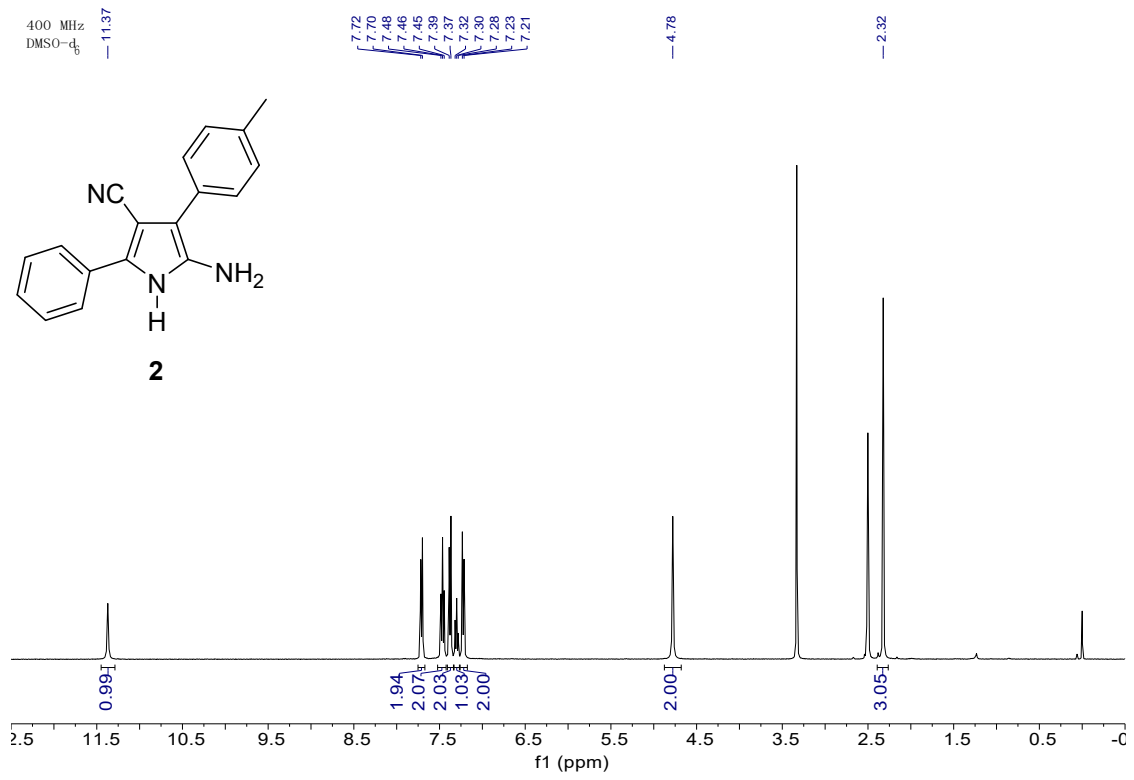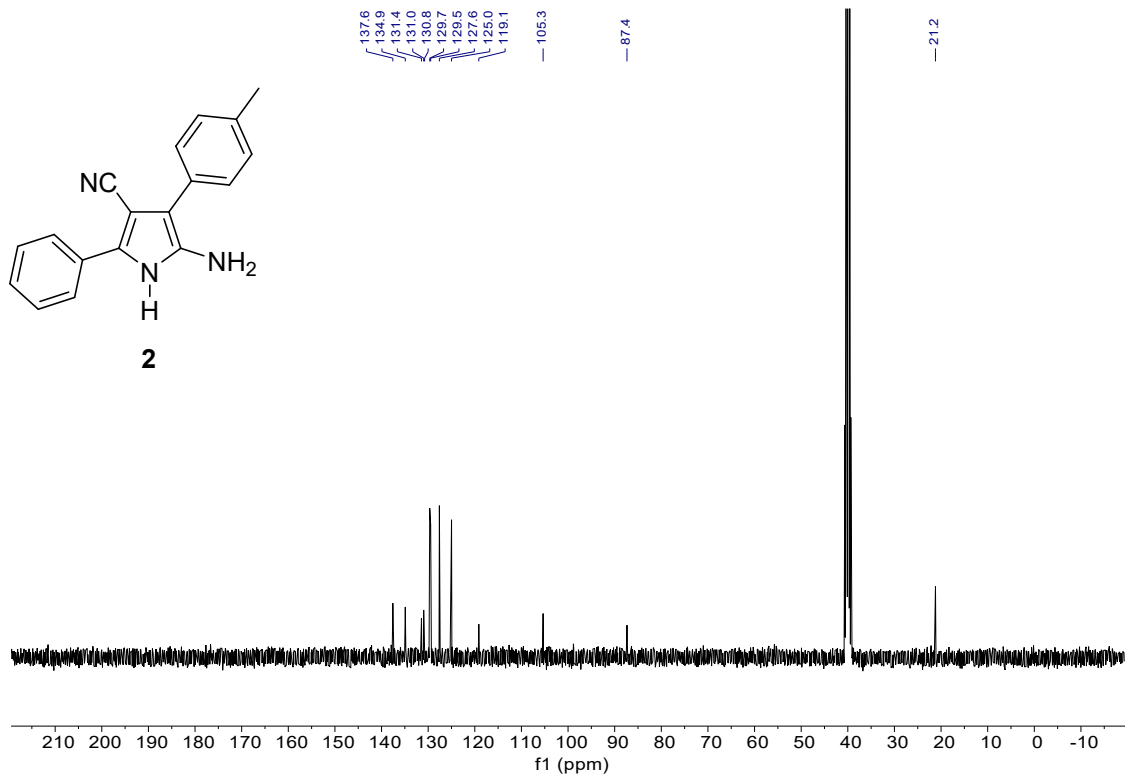

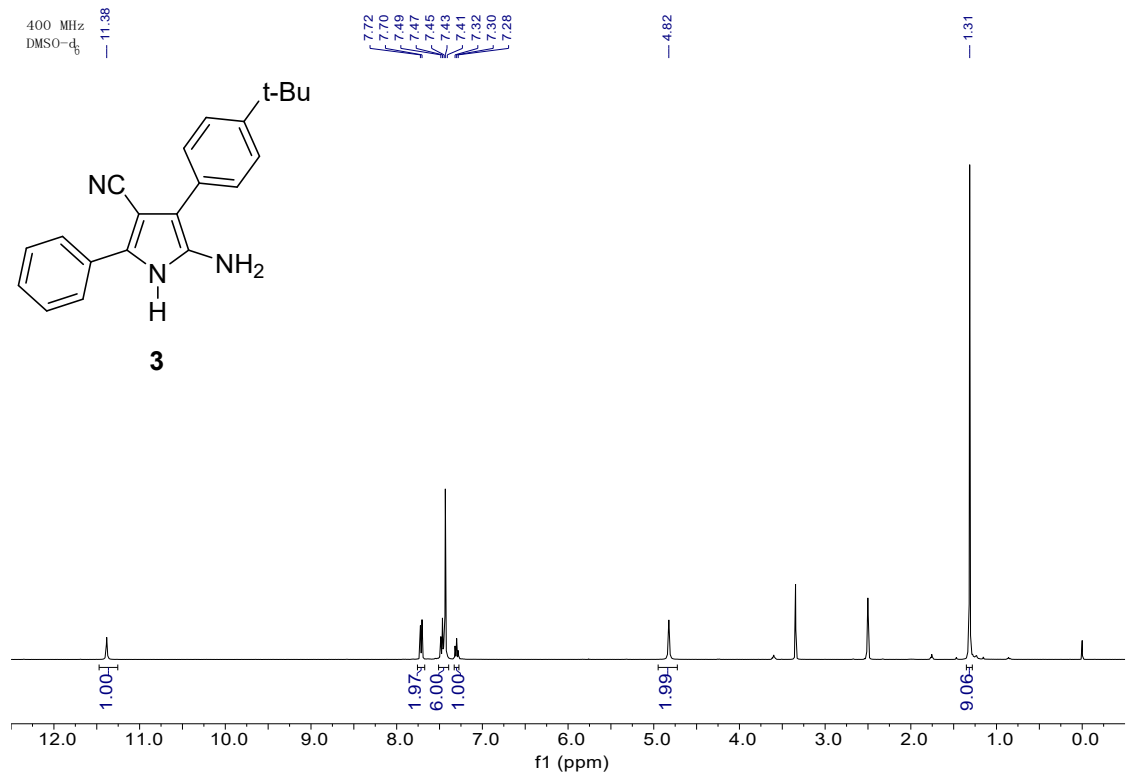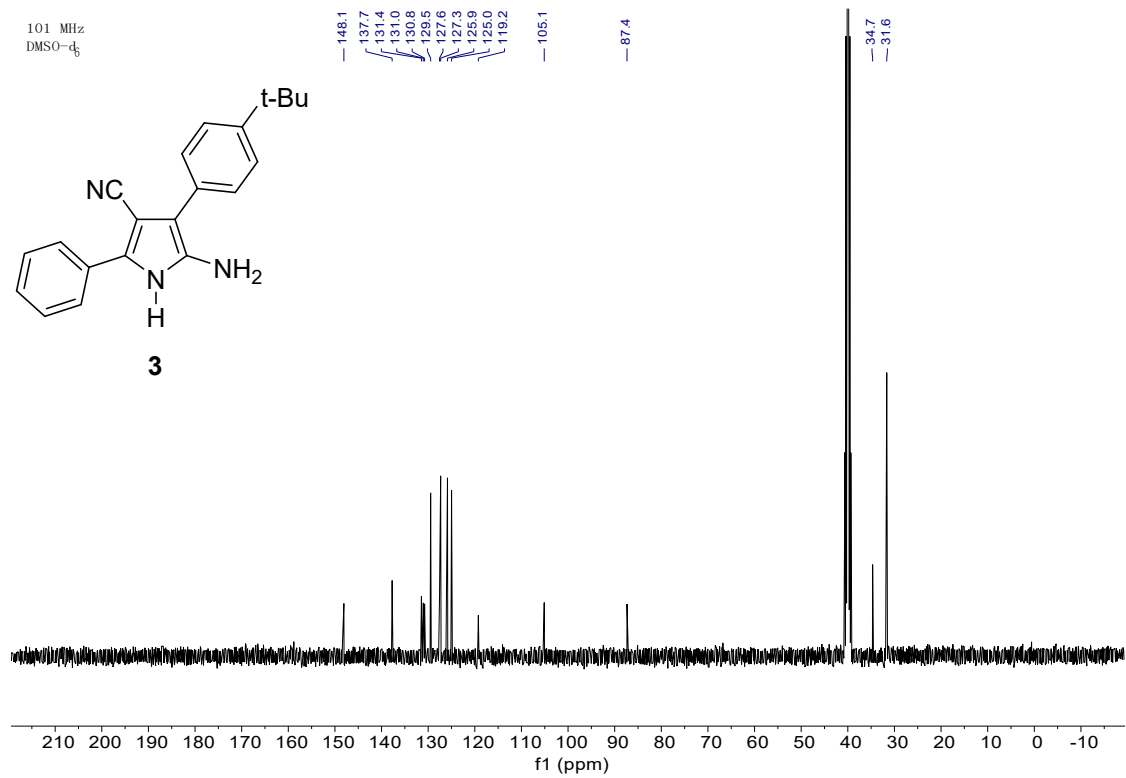

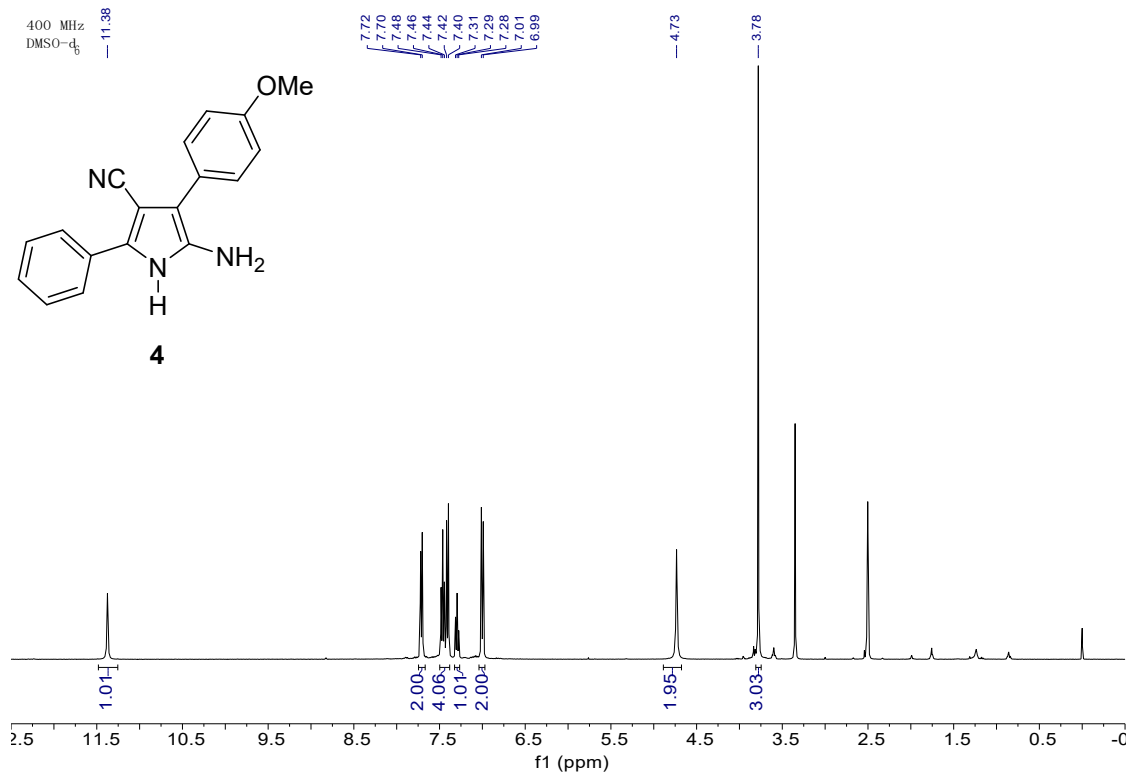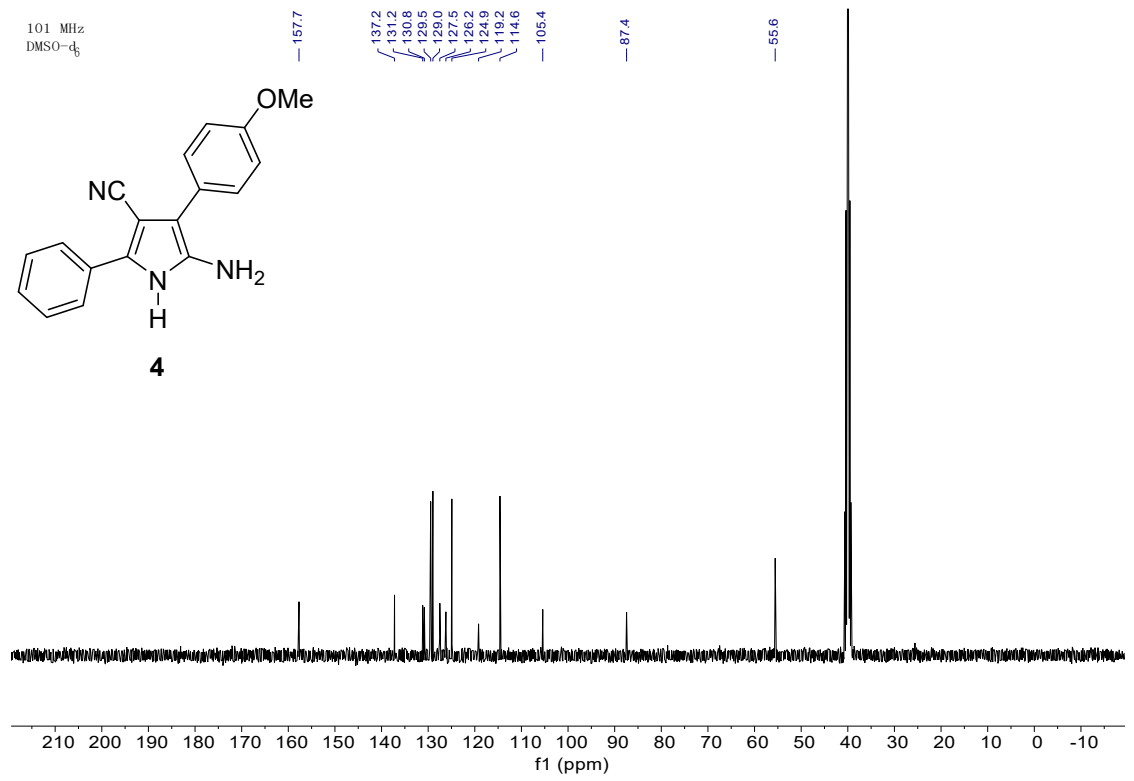

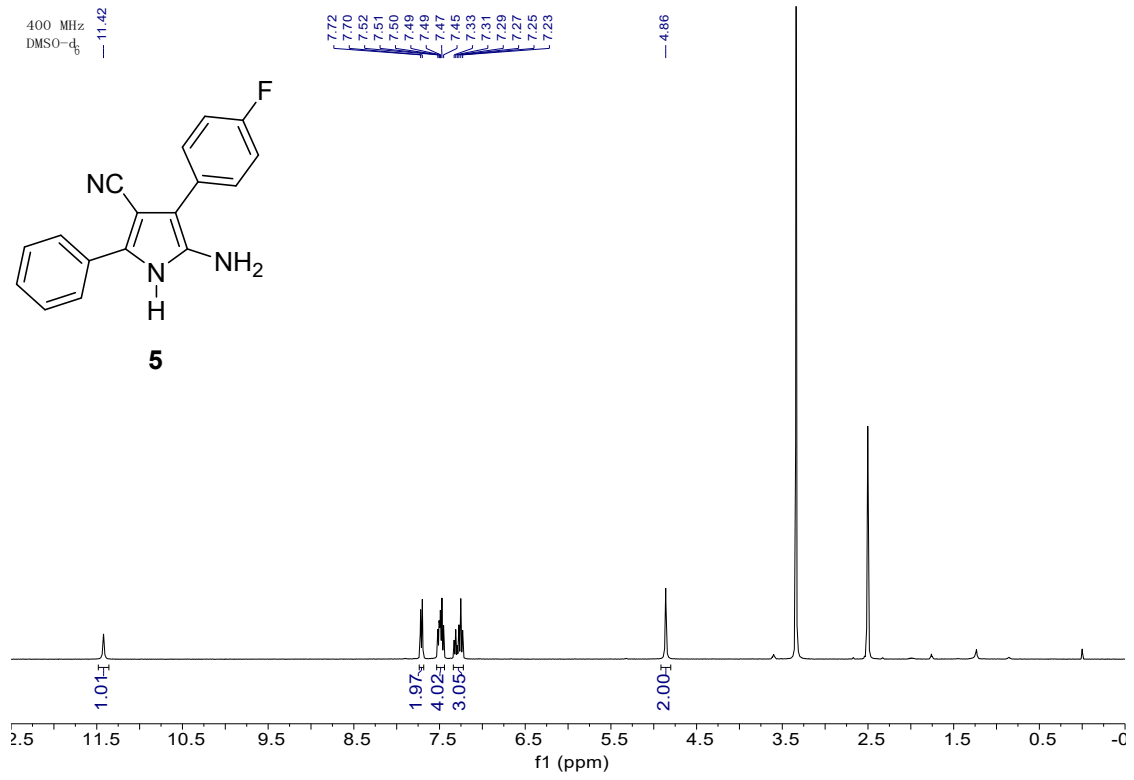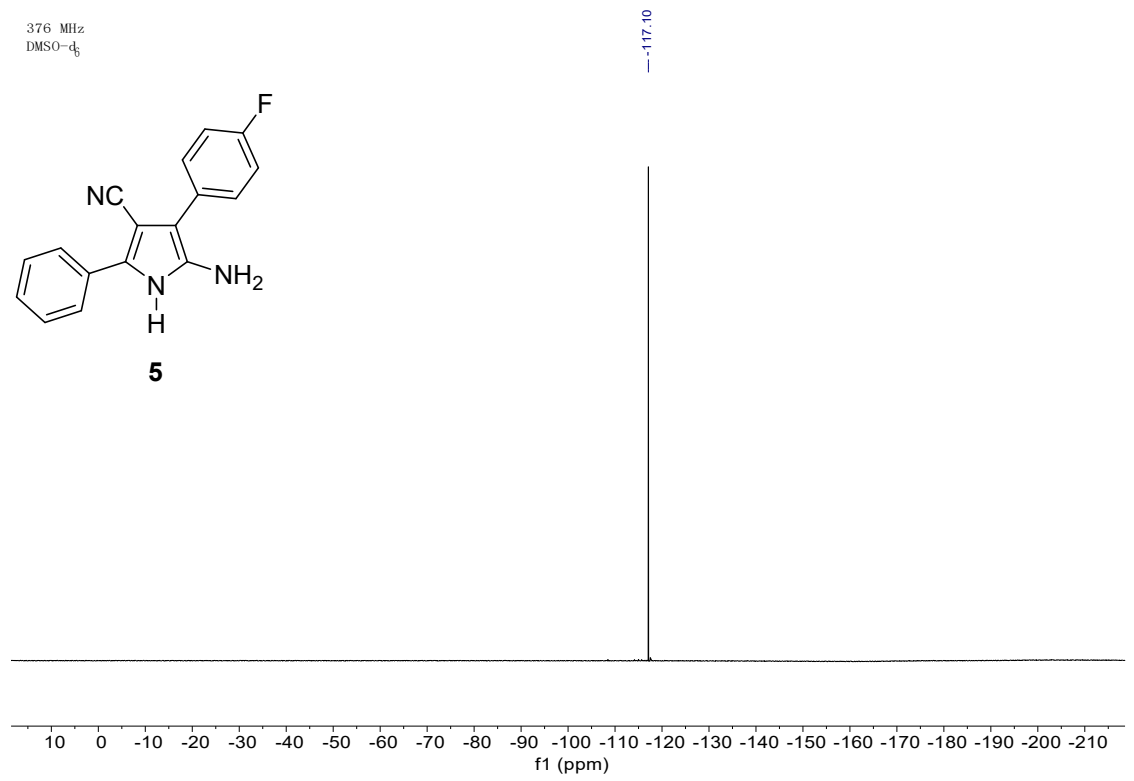

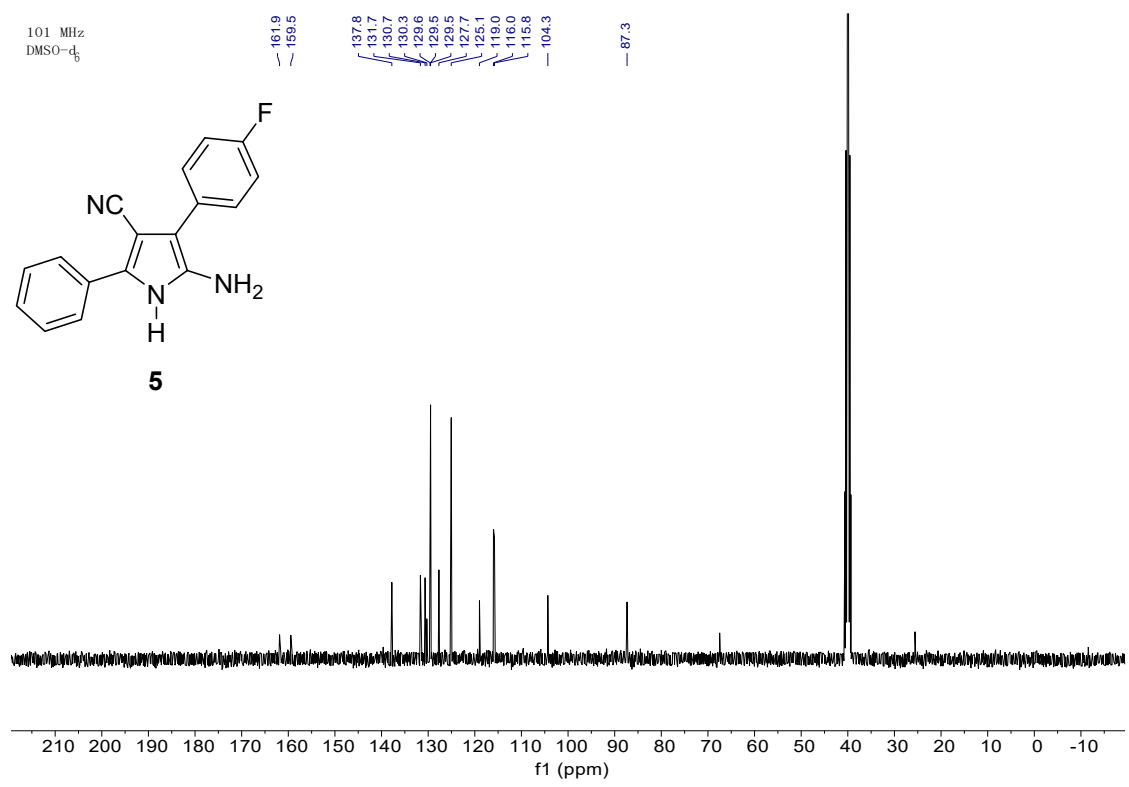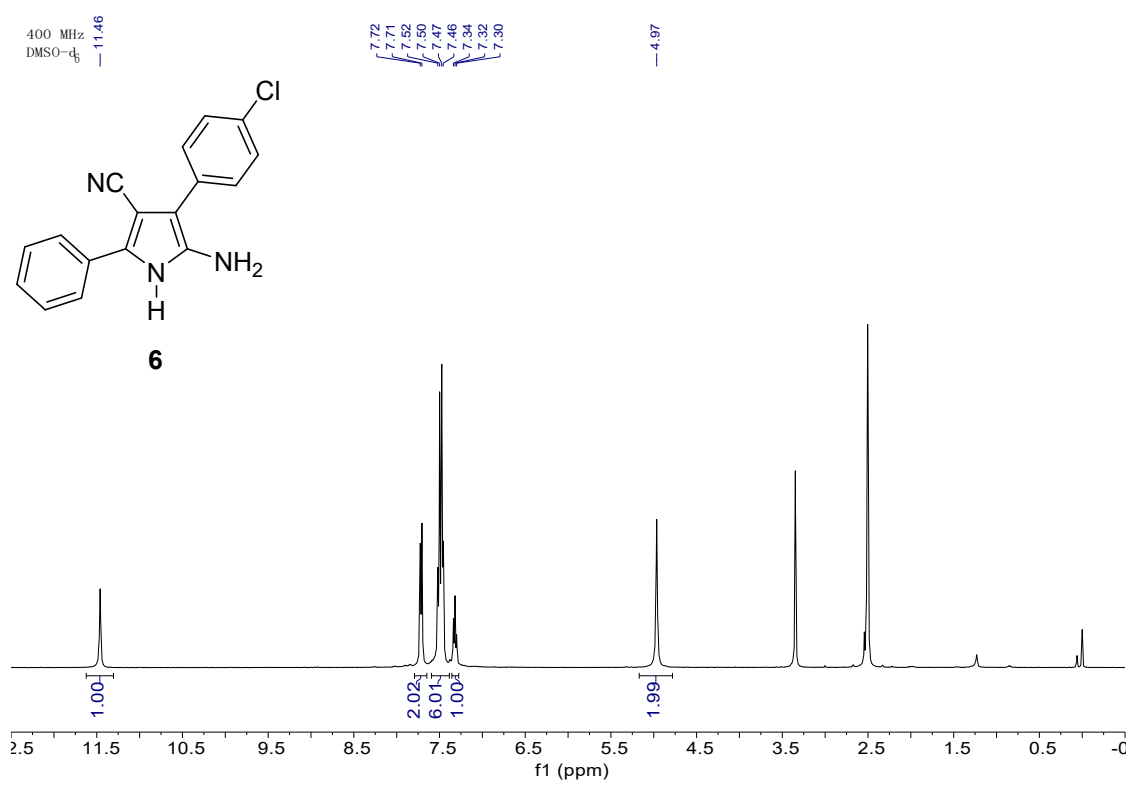



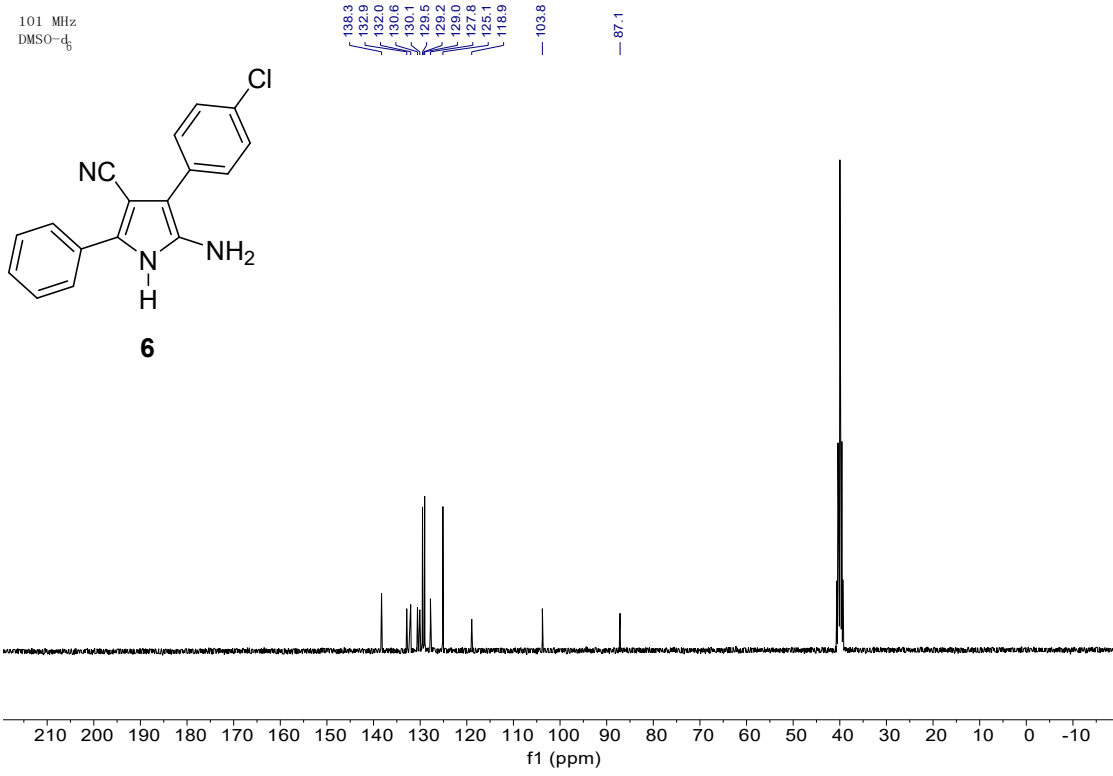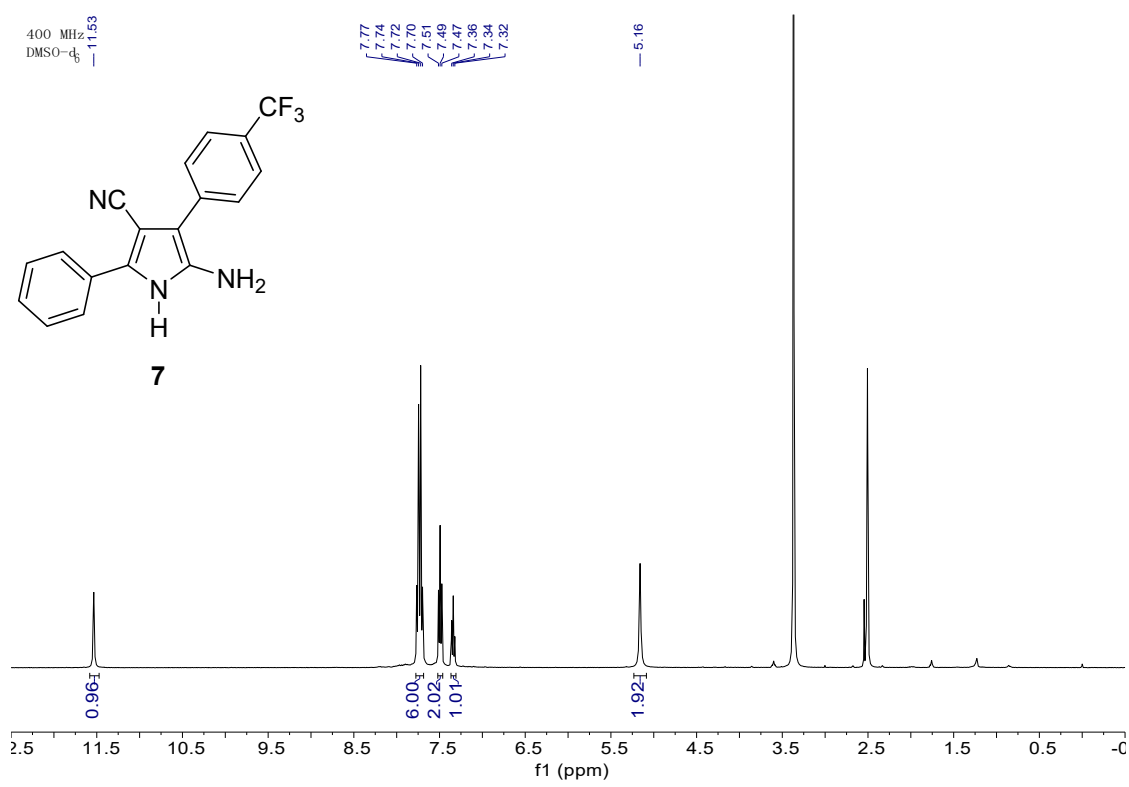

376 MHz  
DMSO-d<sub>6</sub>

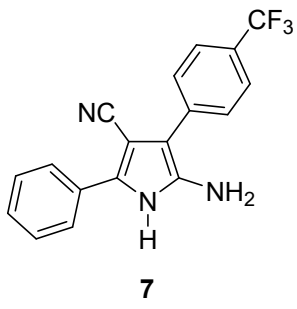

80.62

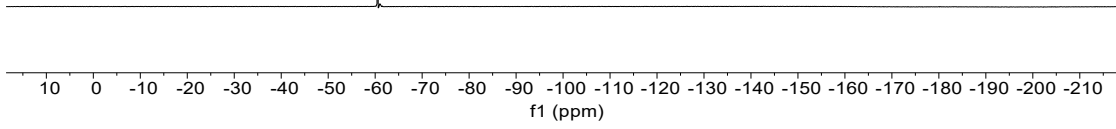

101 MHz  
DMSO-d<sub>6</sub>

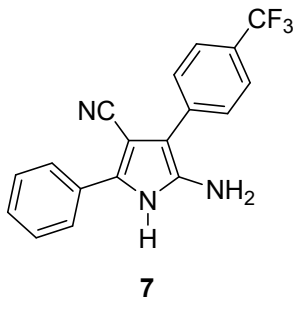

139.2  
138.4  
132.6  
130.4  
129.5  
128.0  
127.7  
125.9  
125.3  
118.9

103.1

87.0

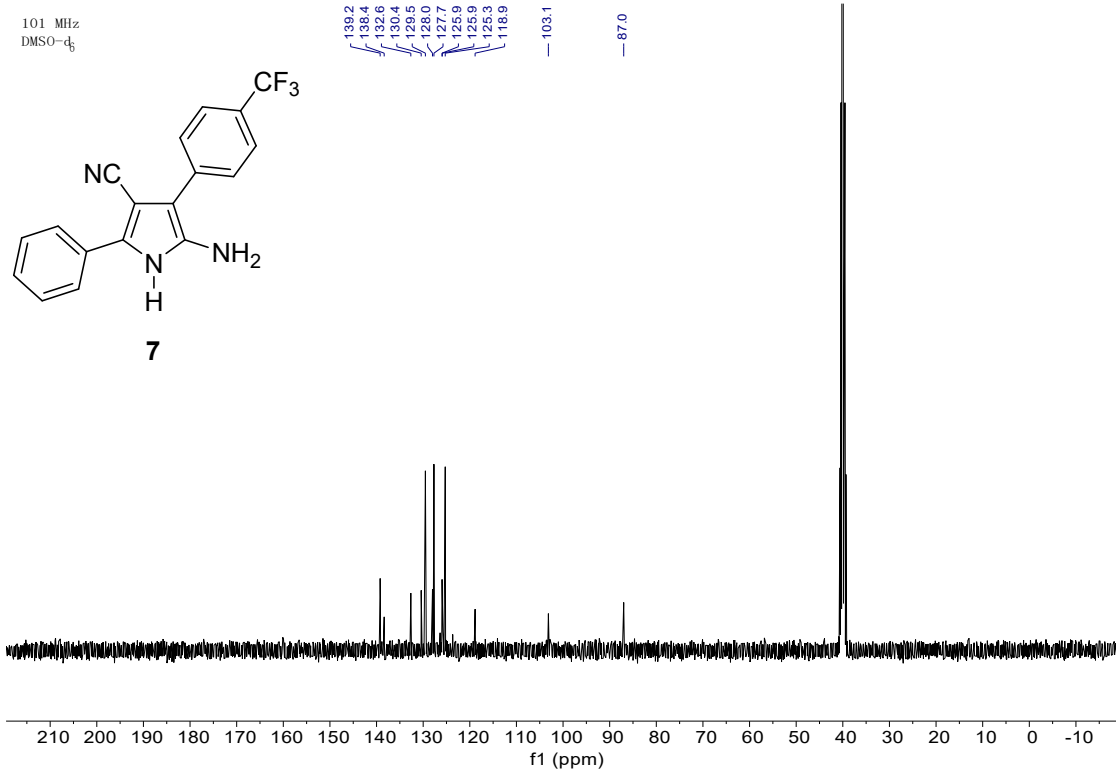

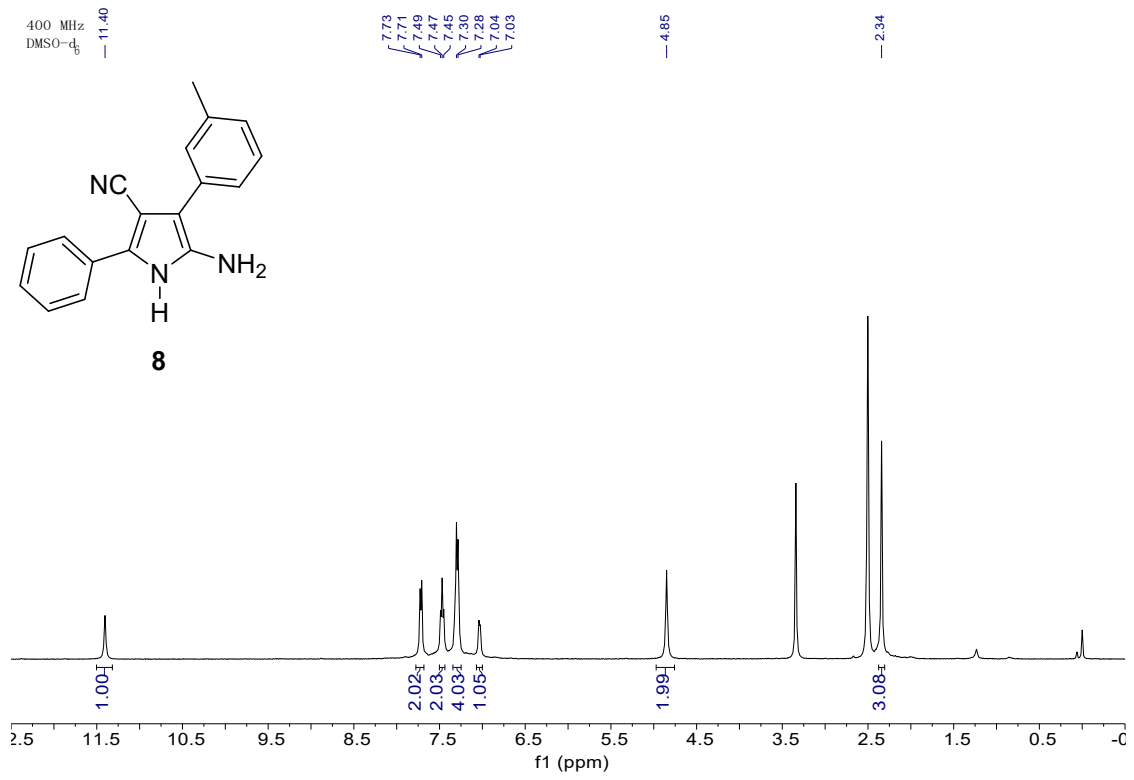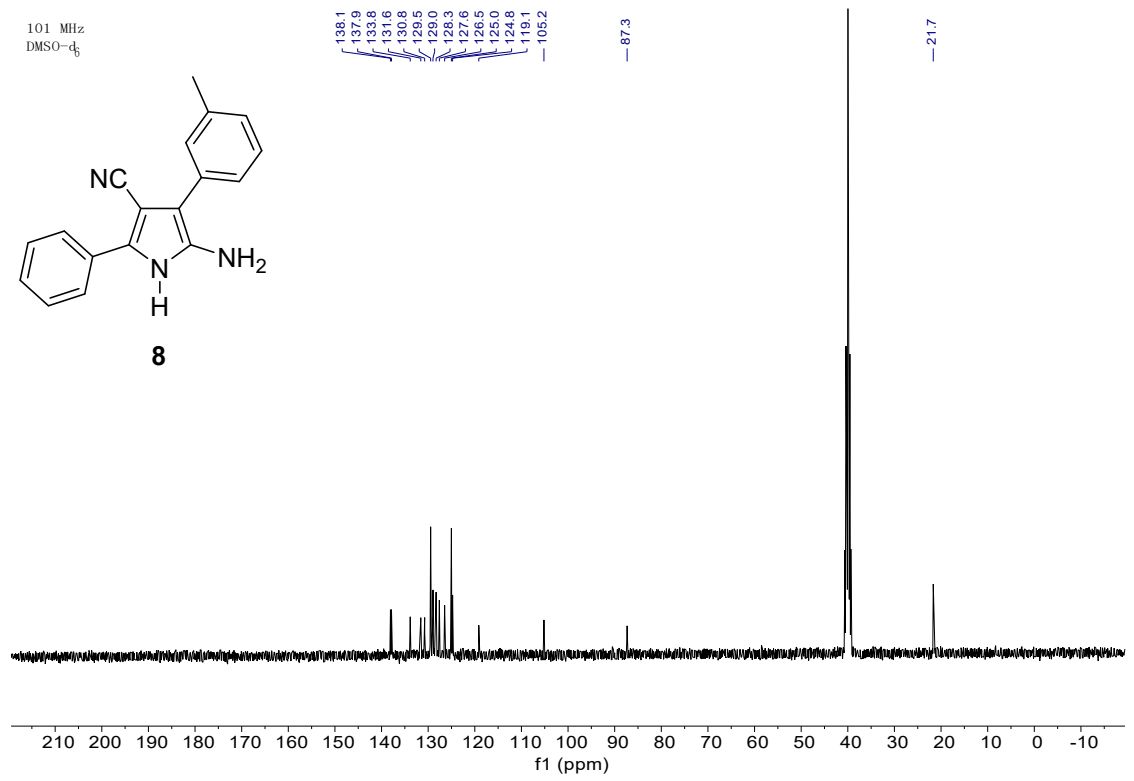

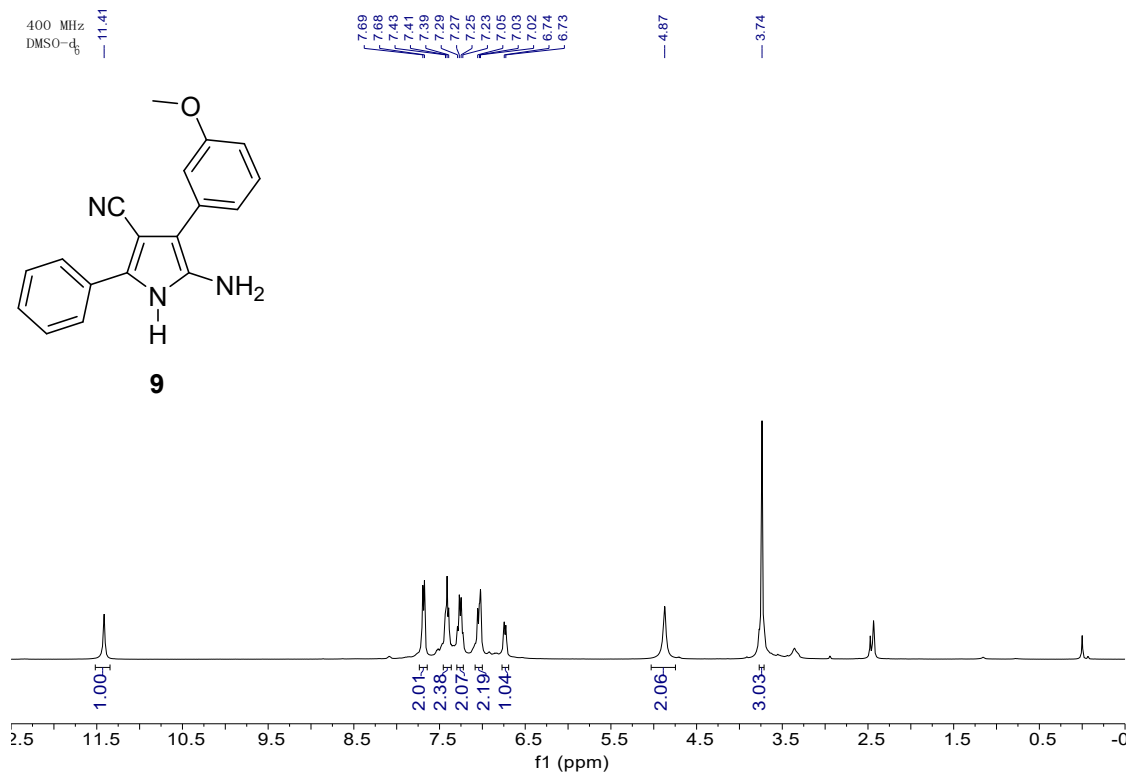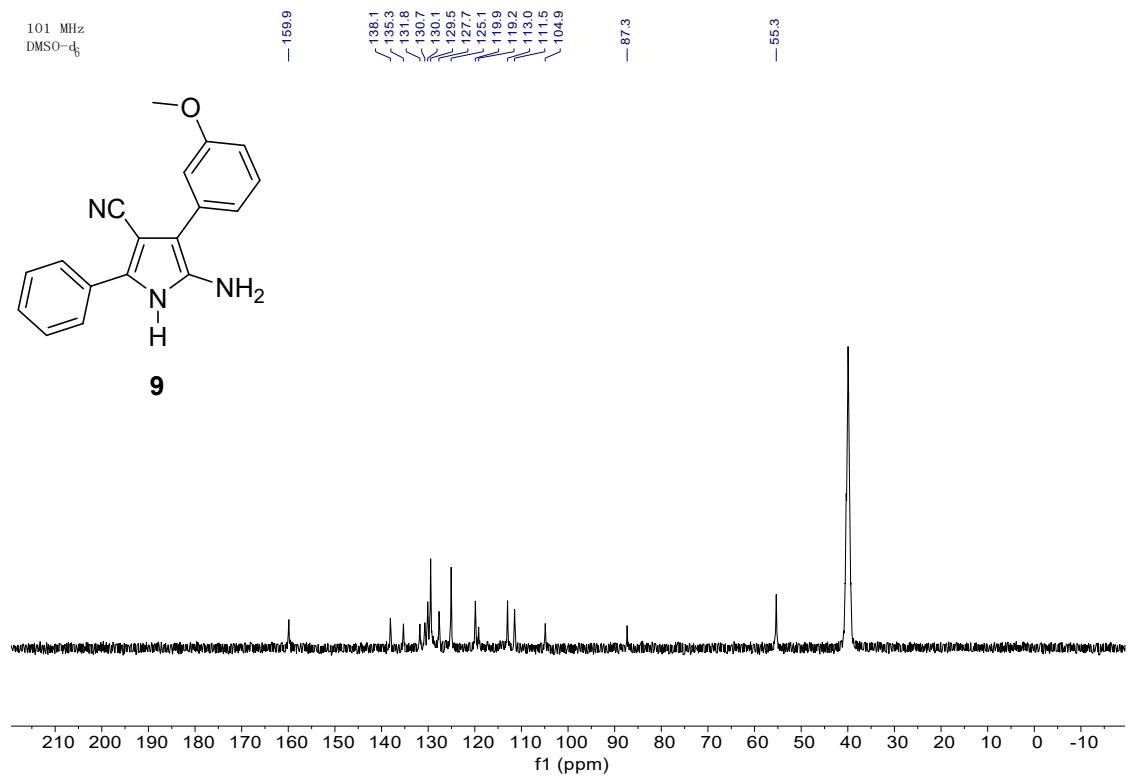

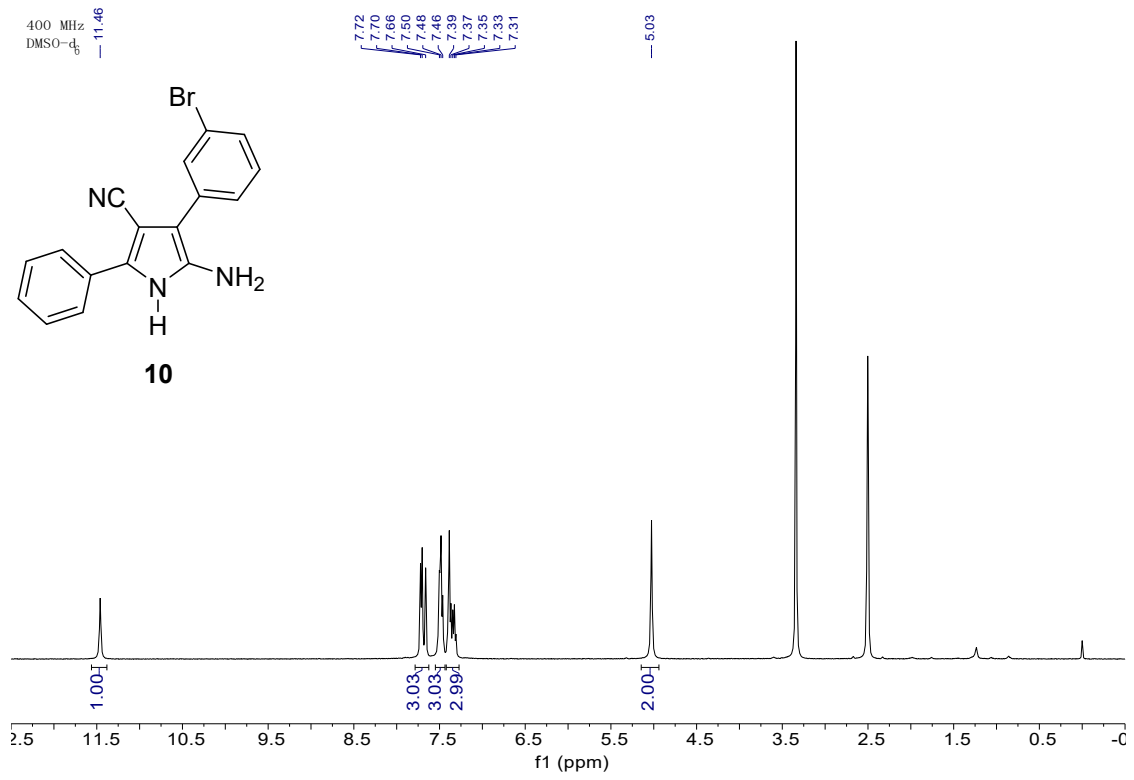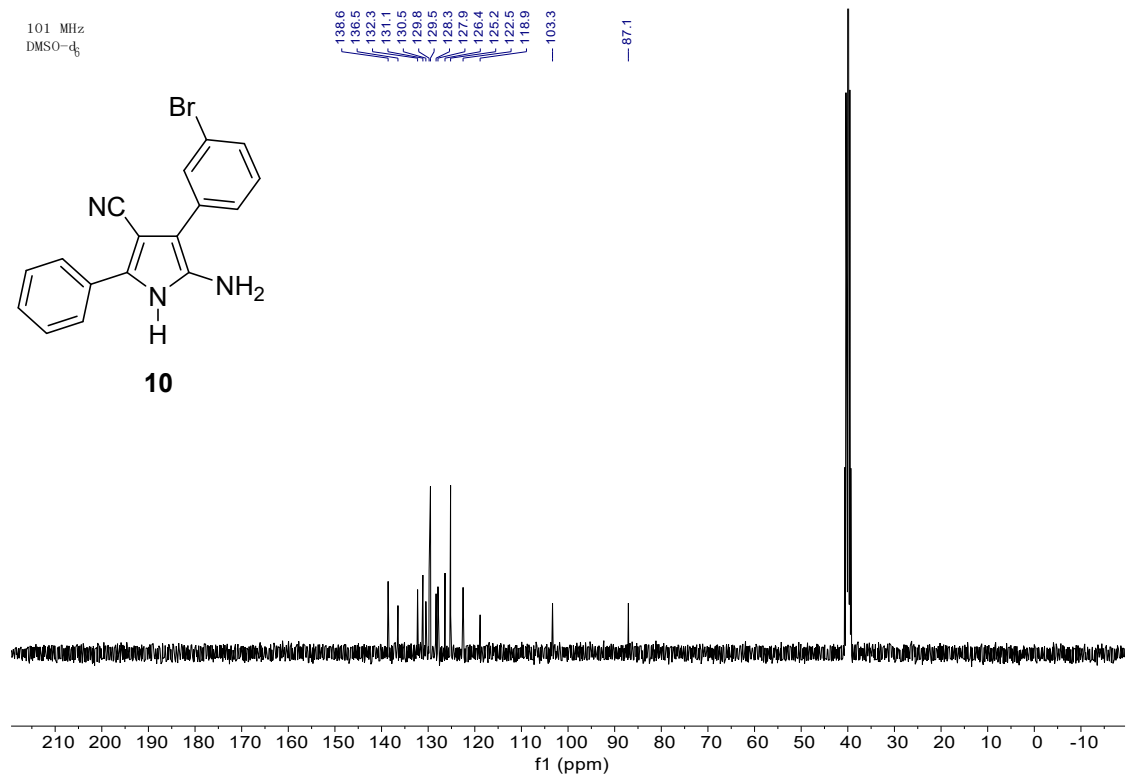

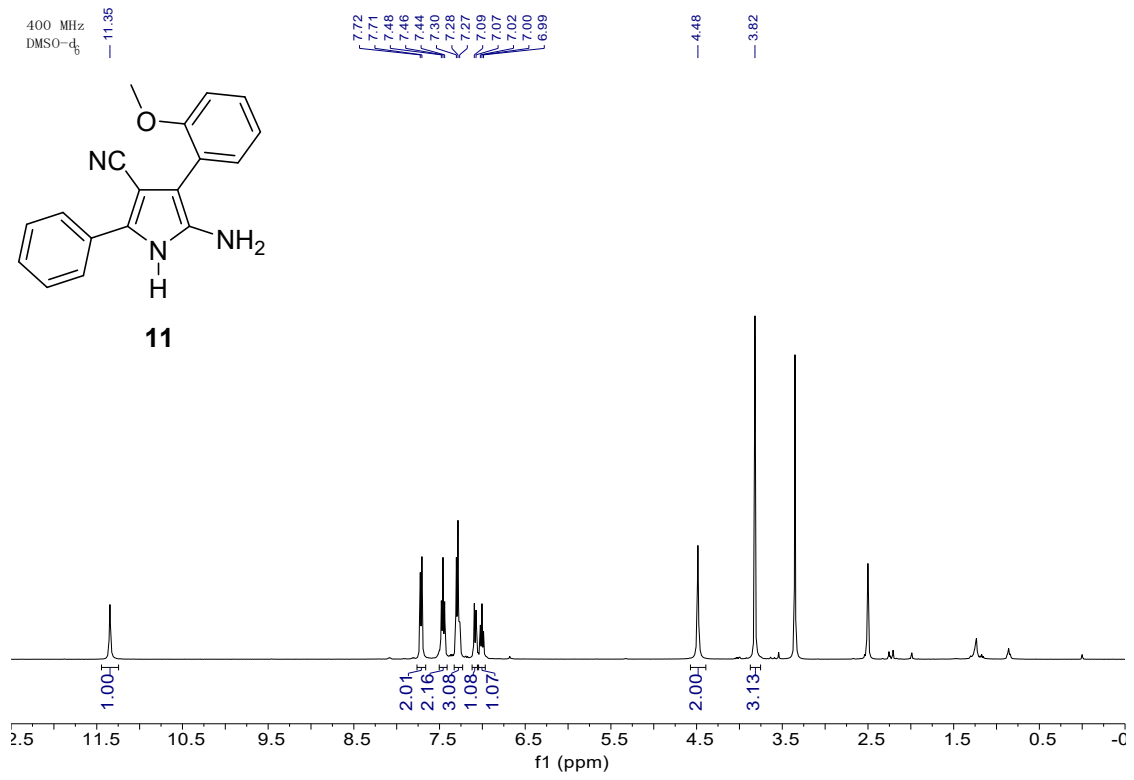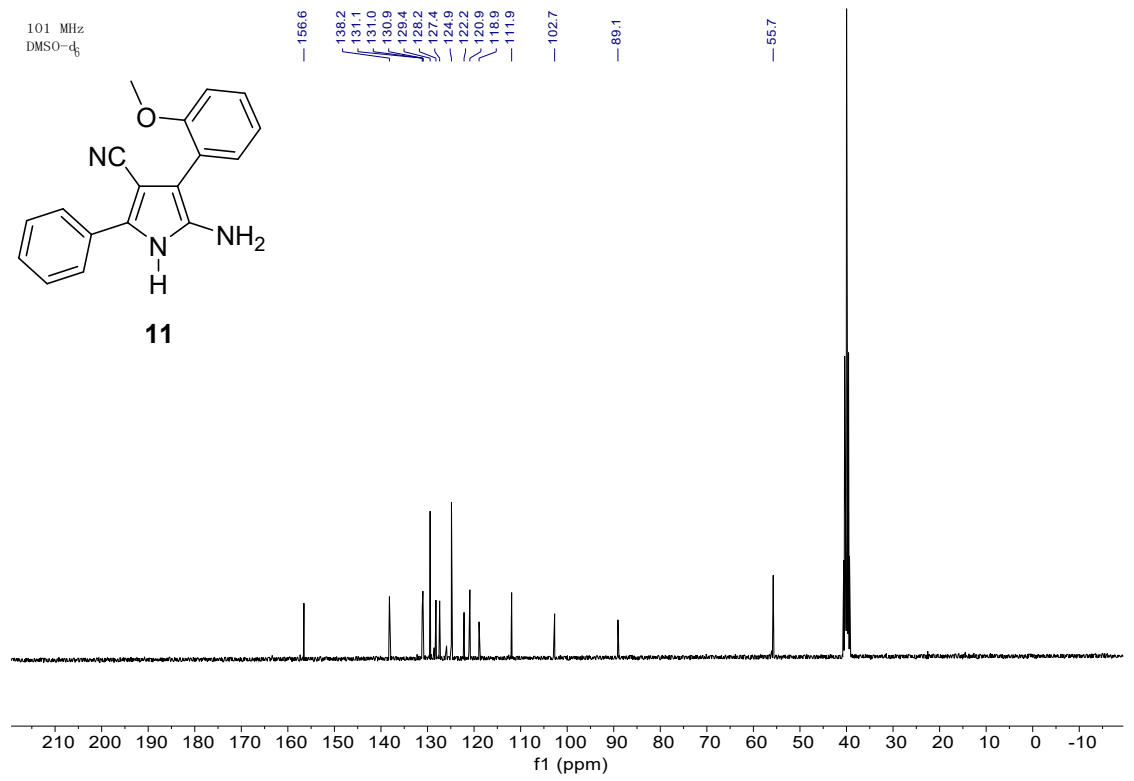

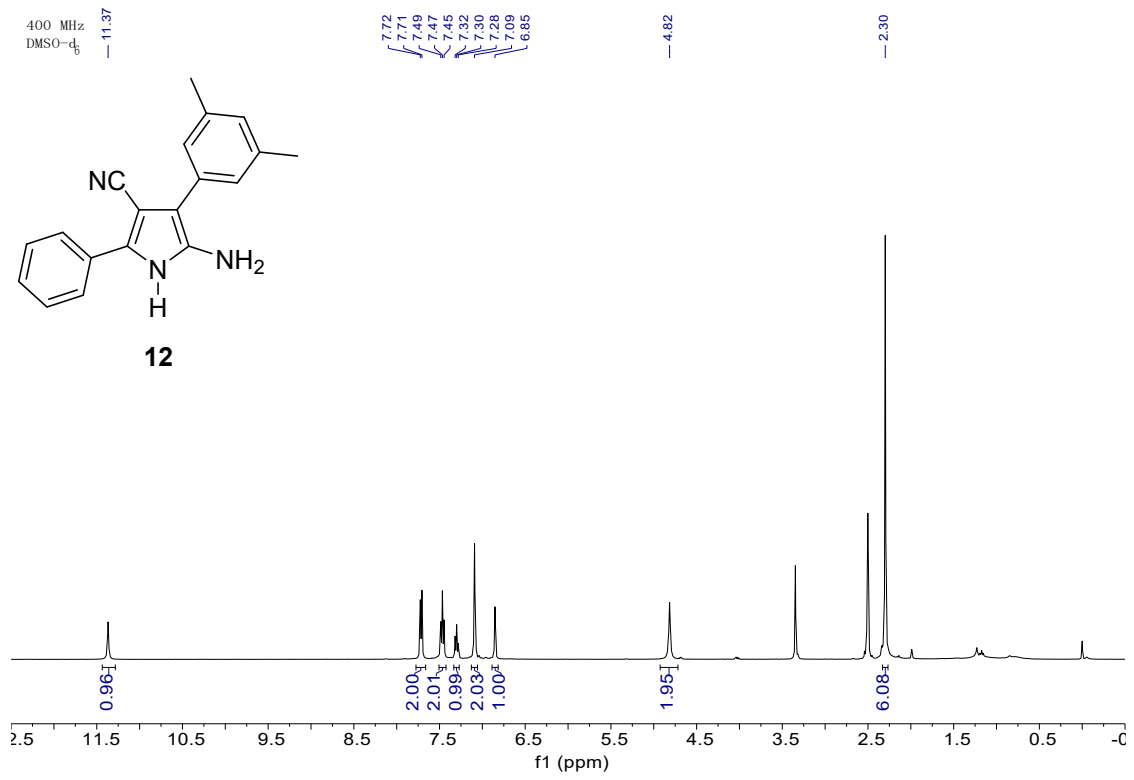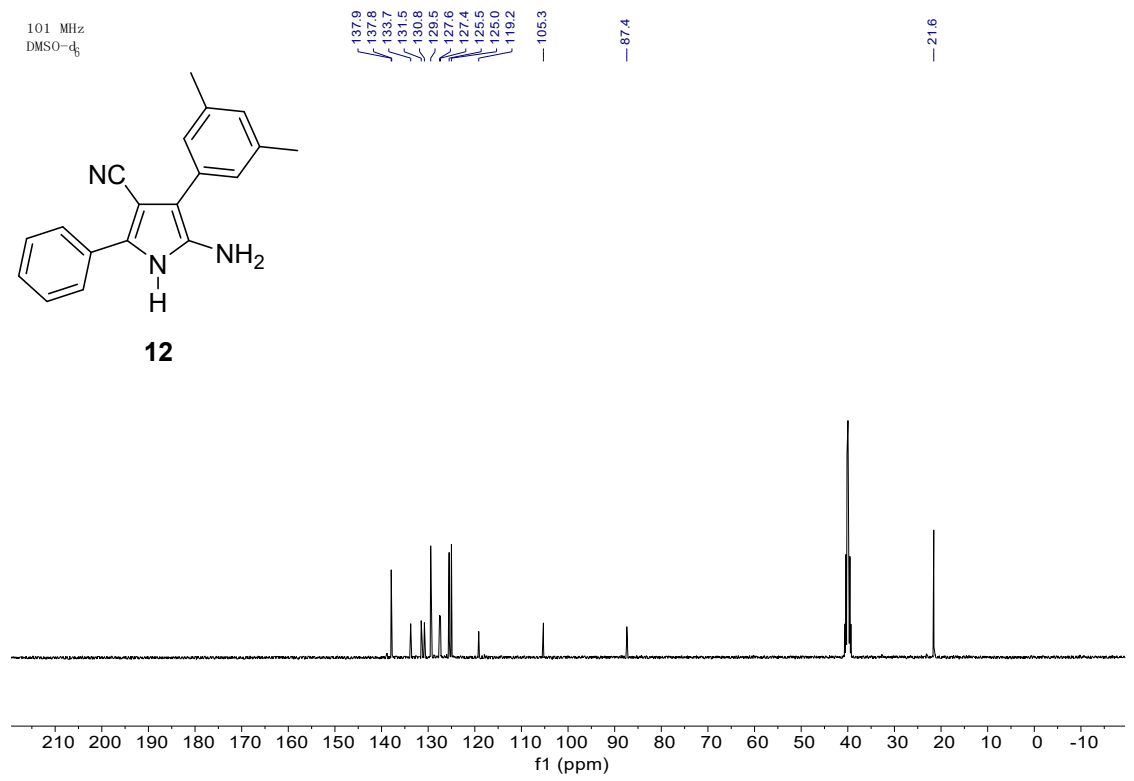

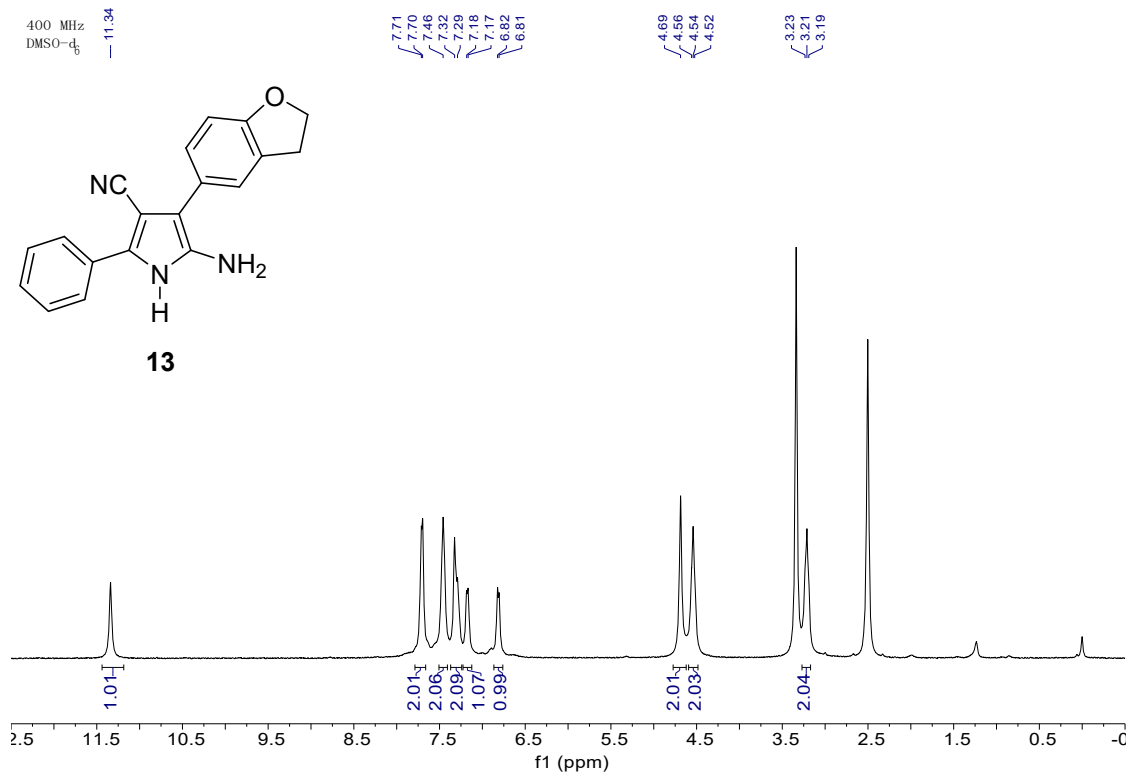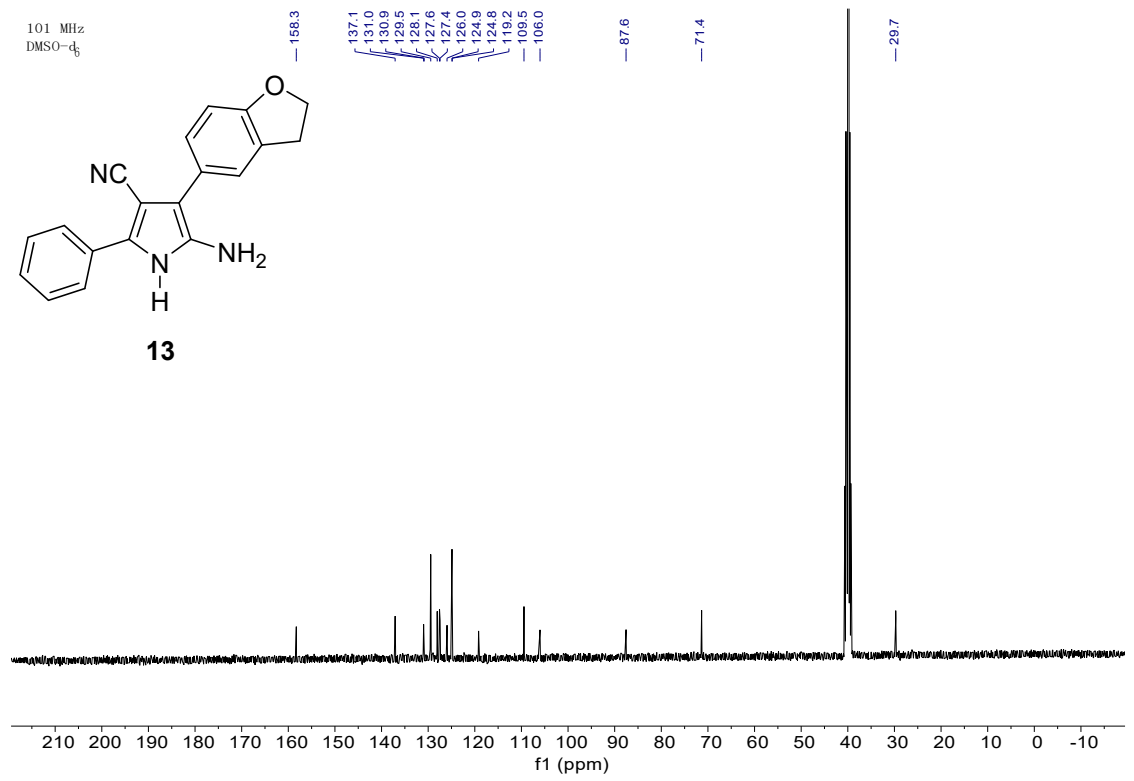



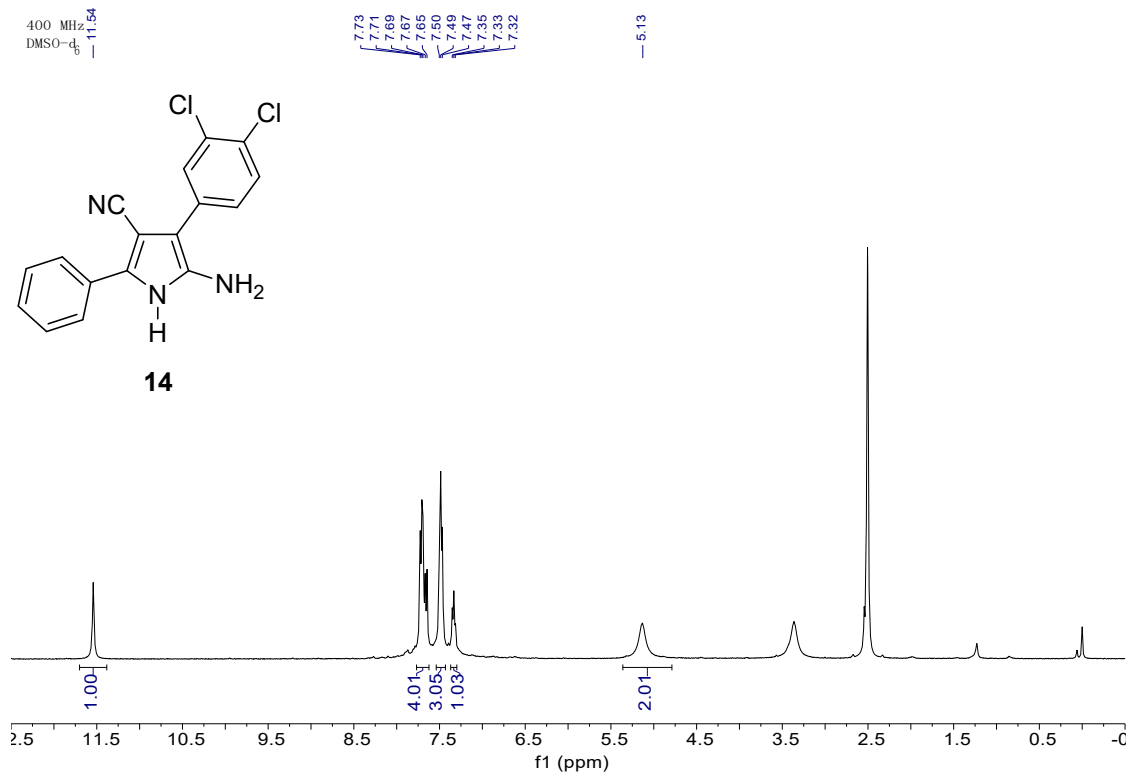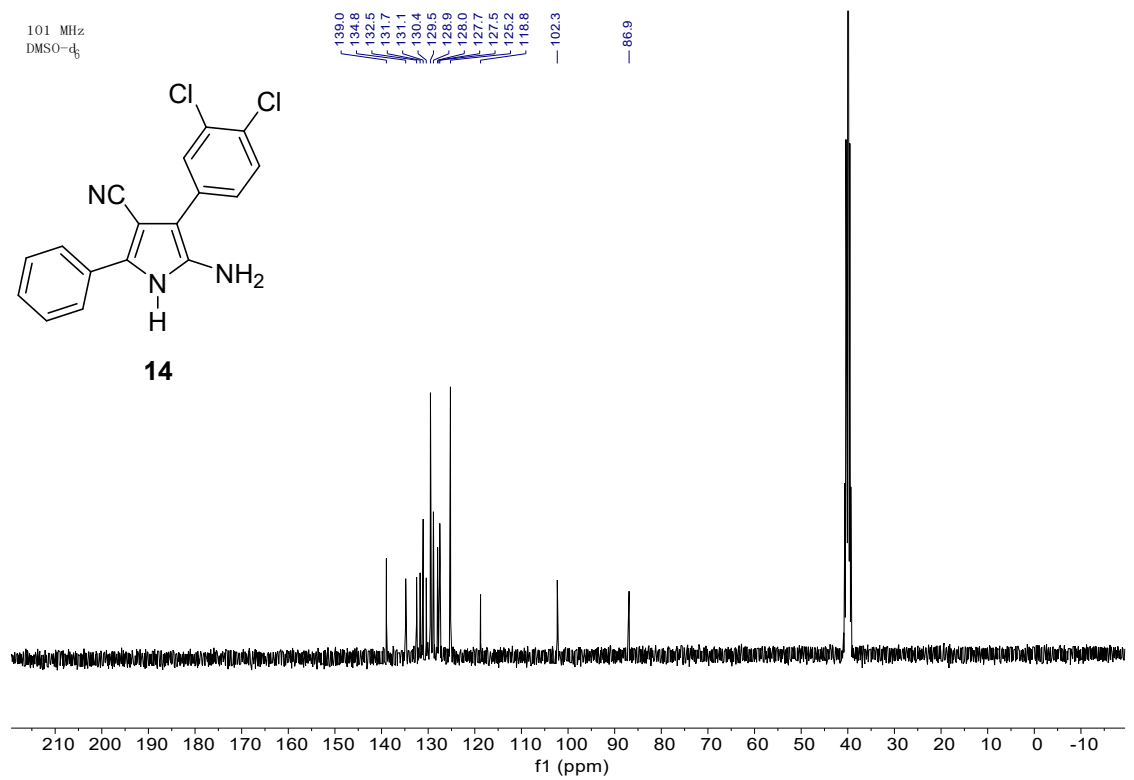

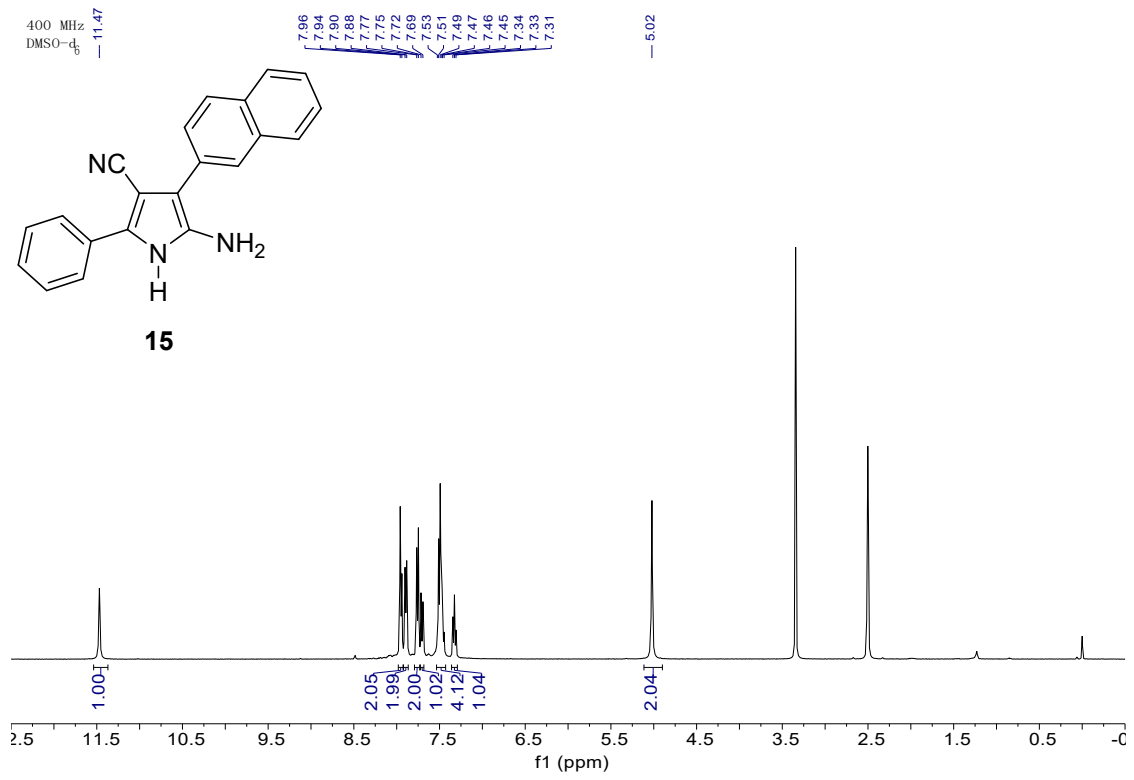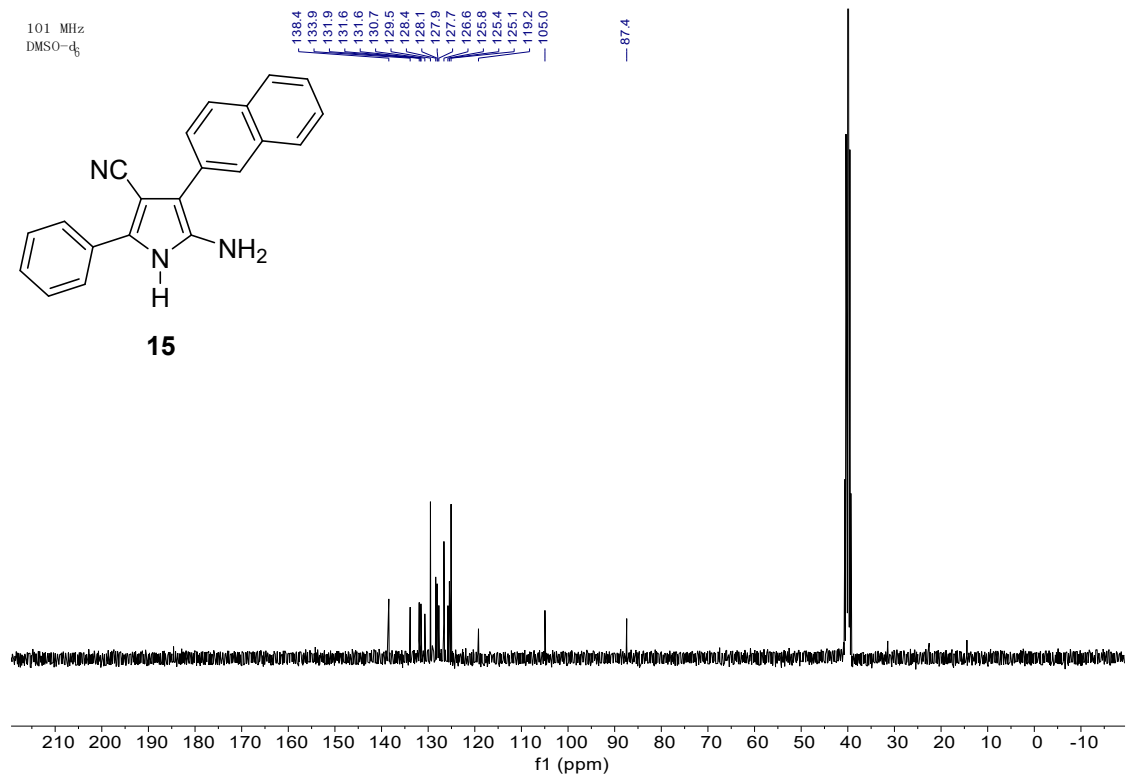

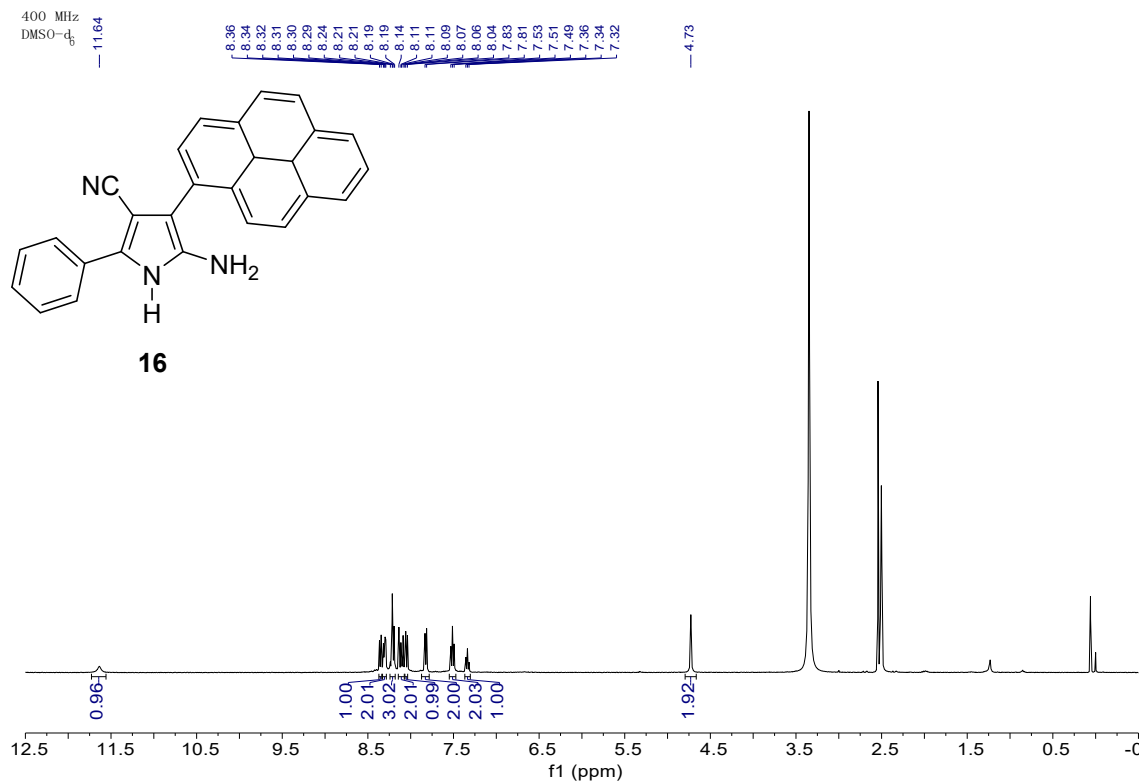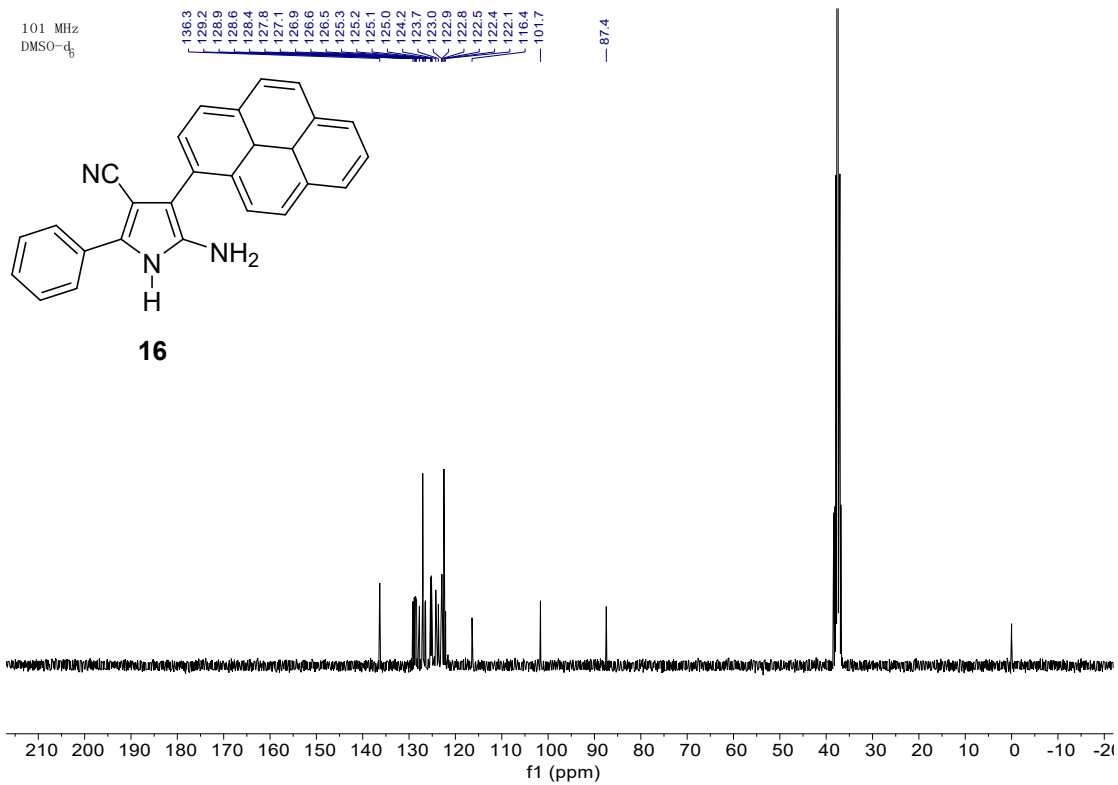

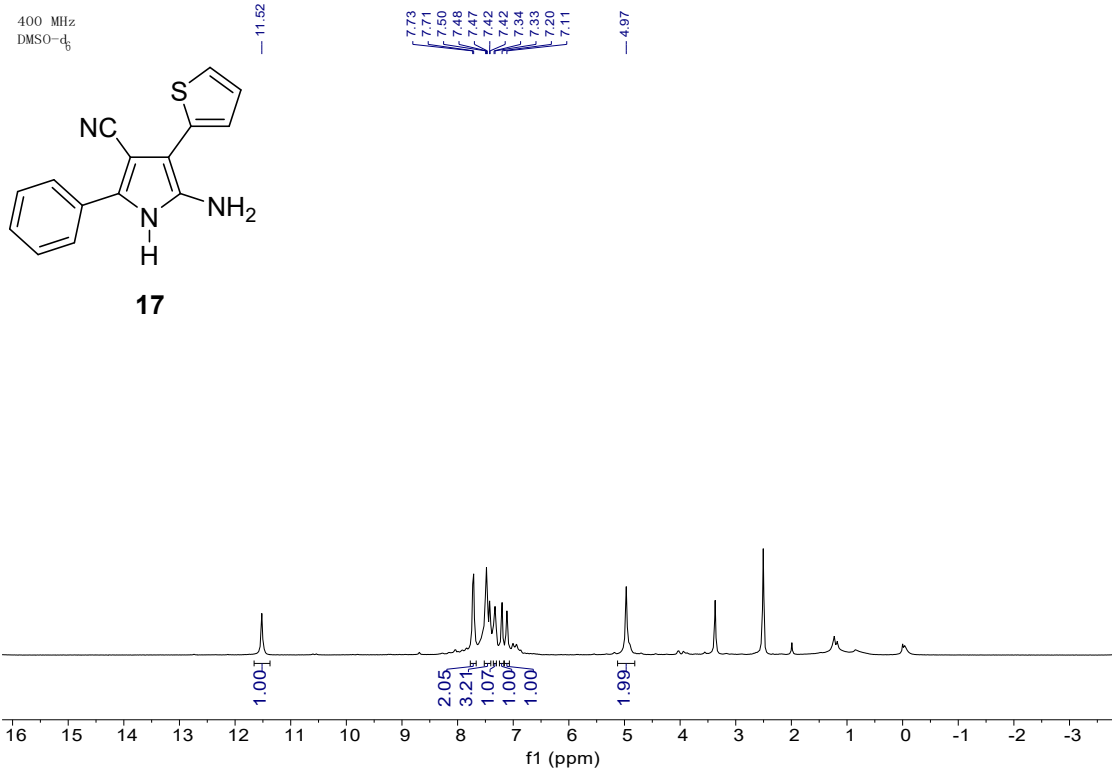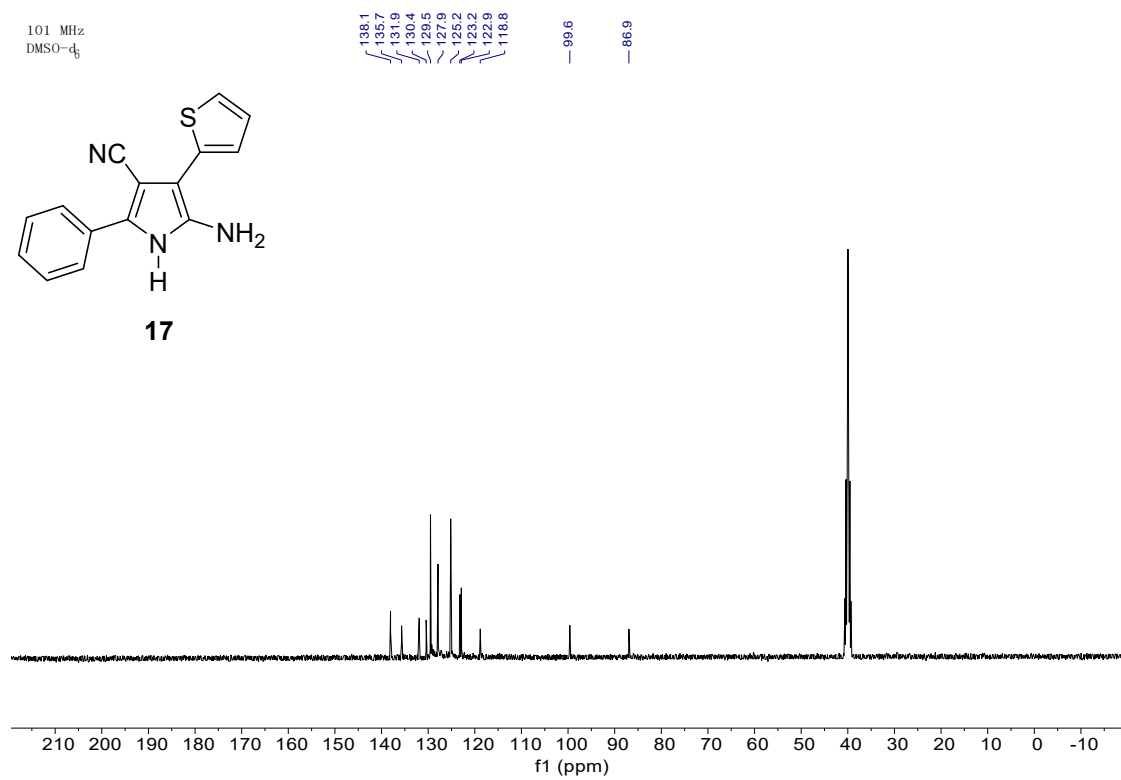

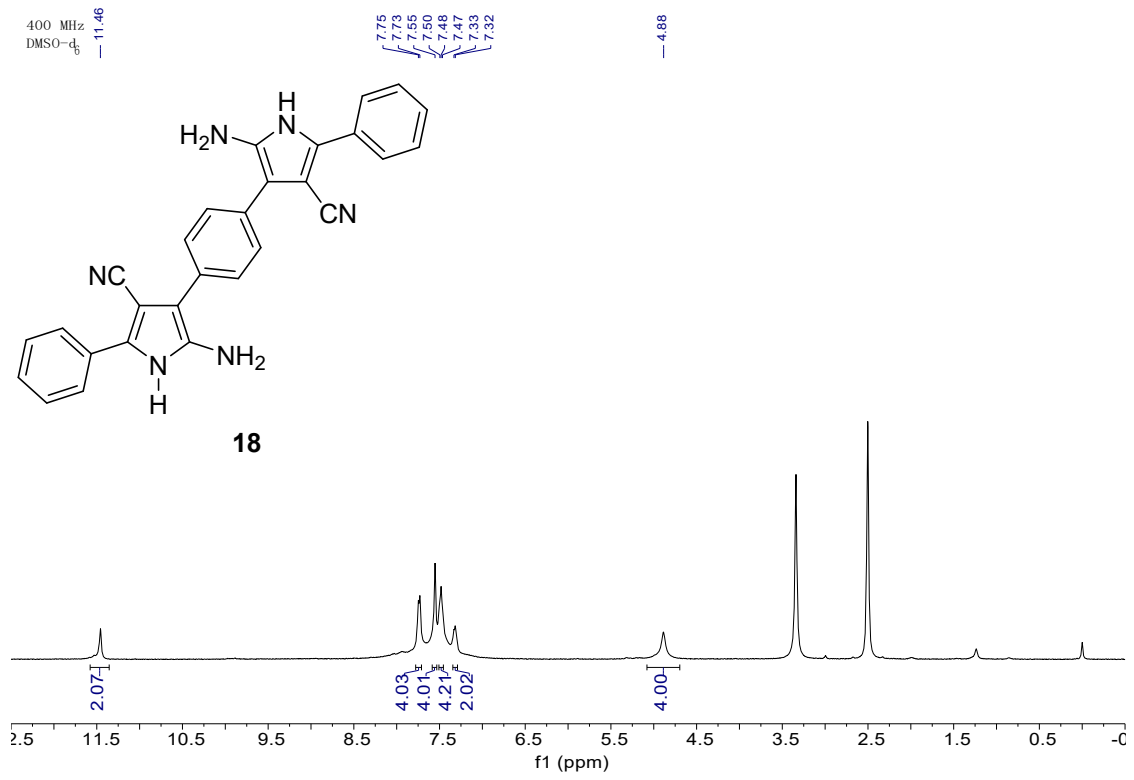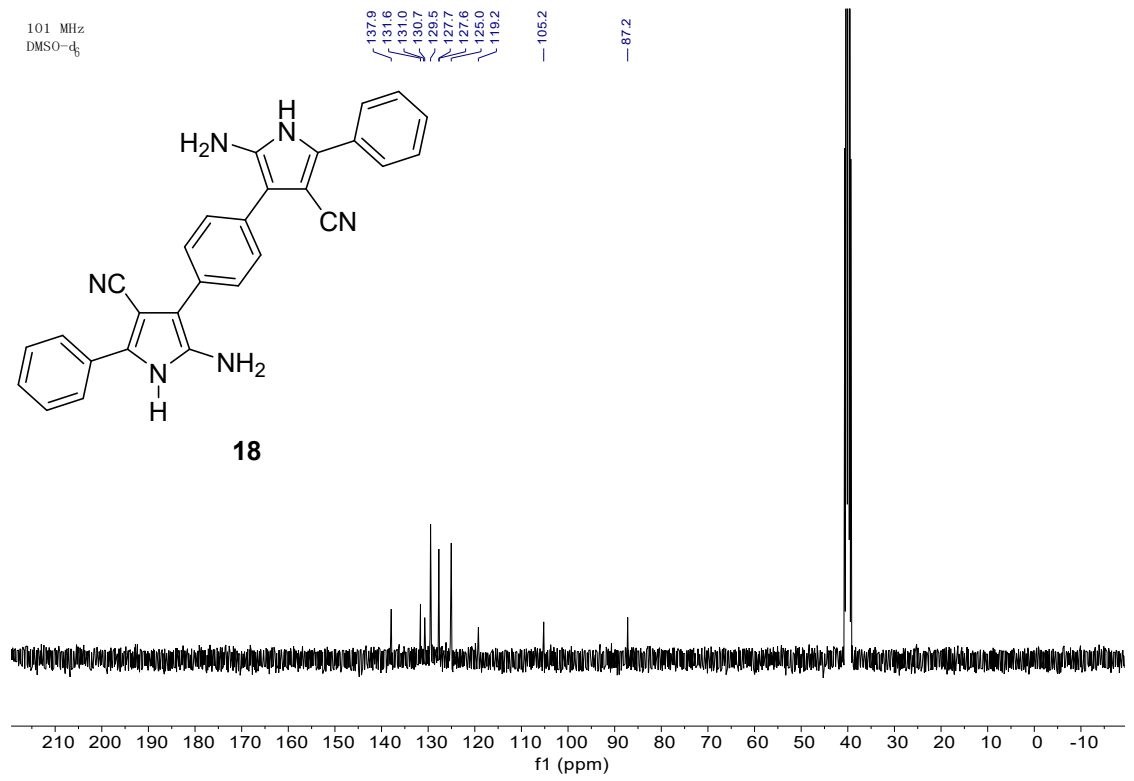

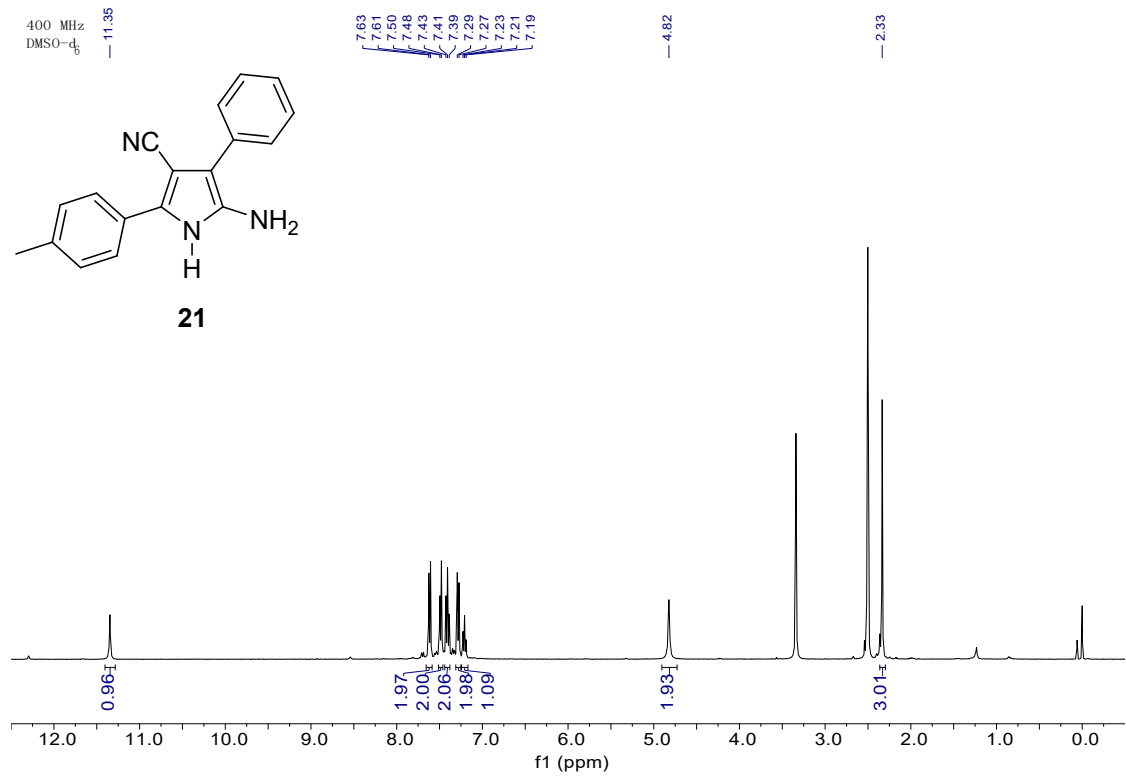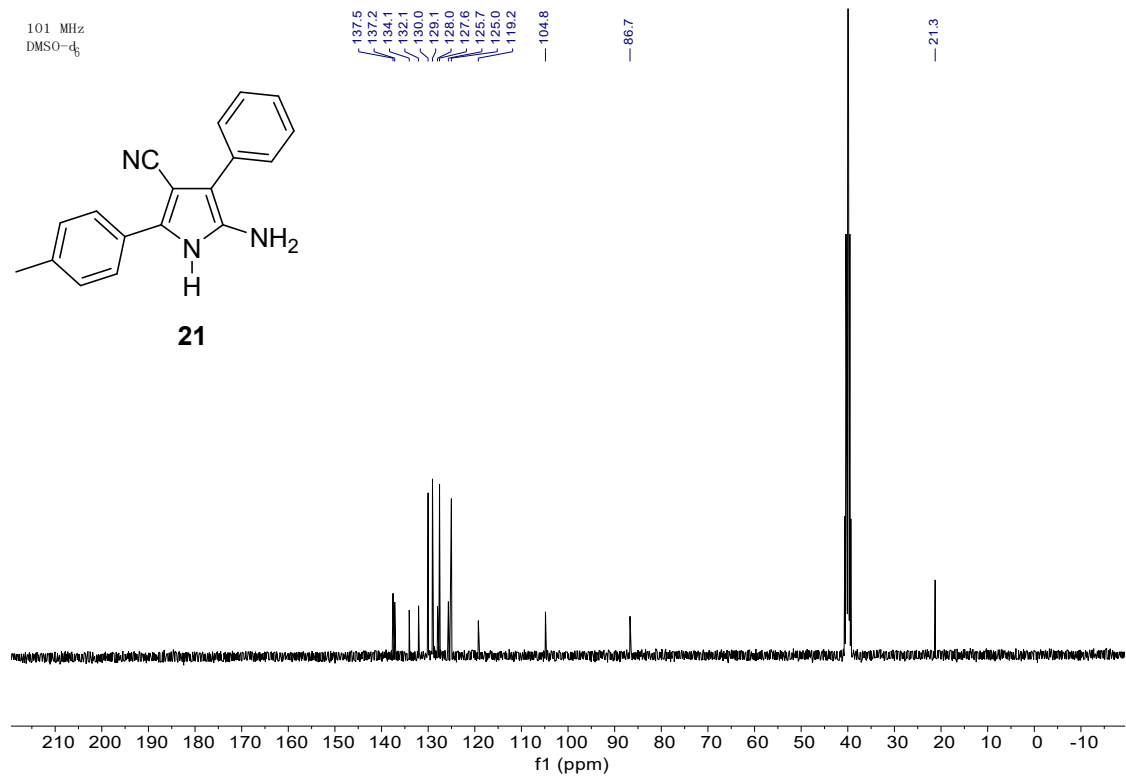

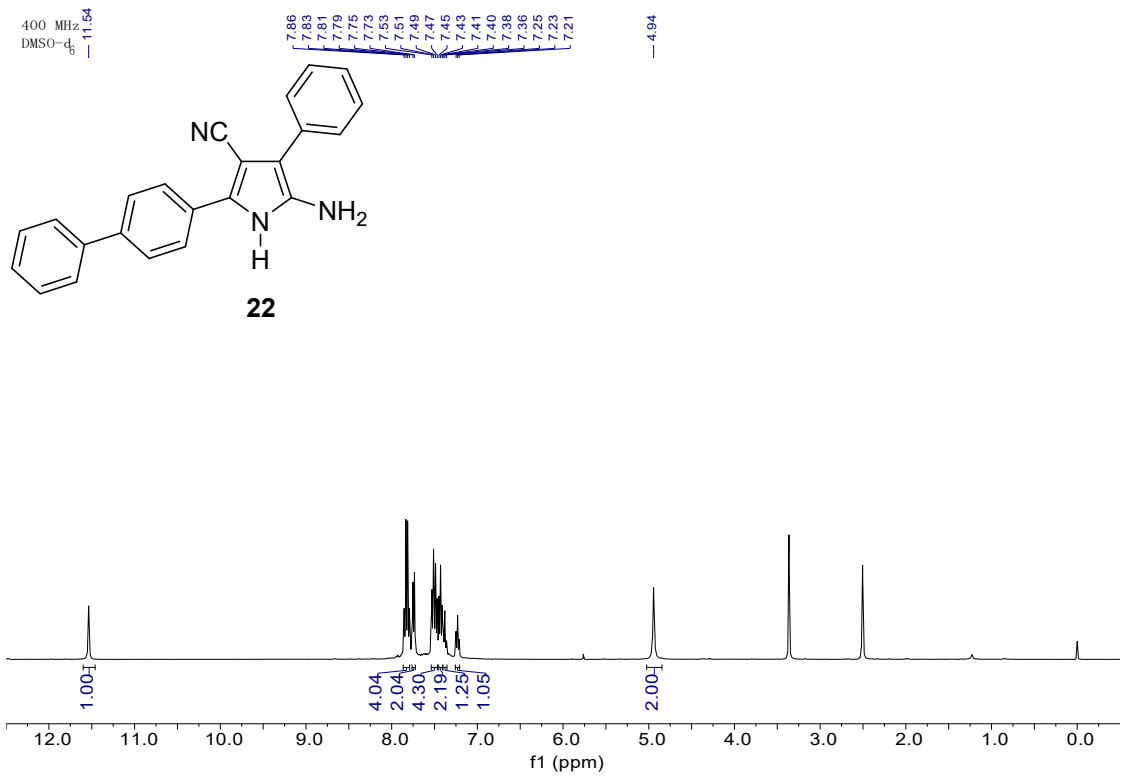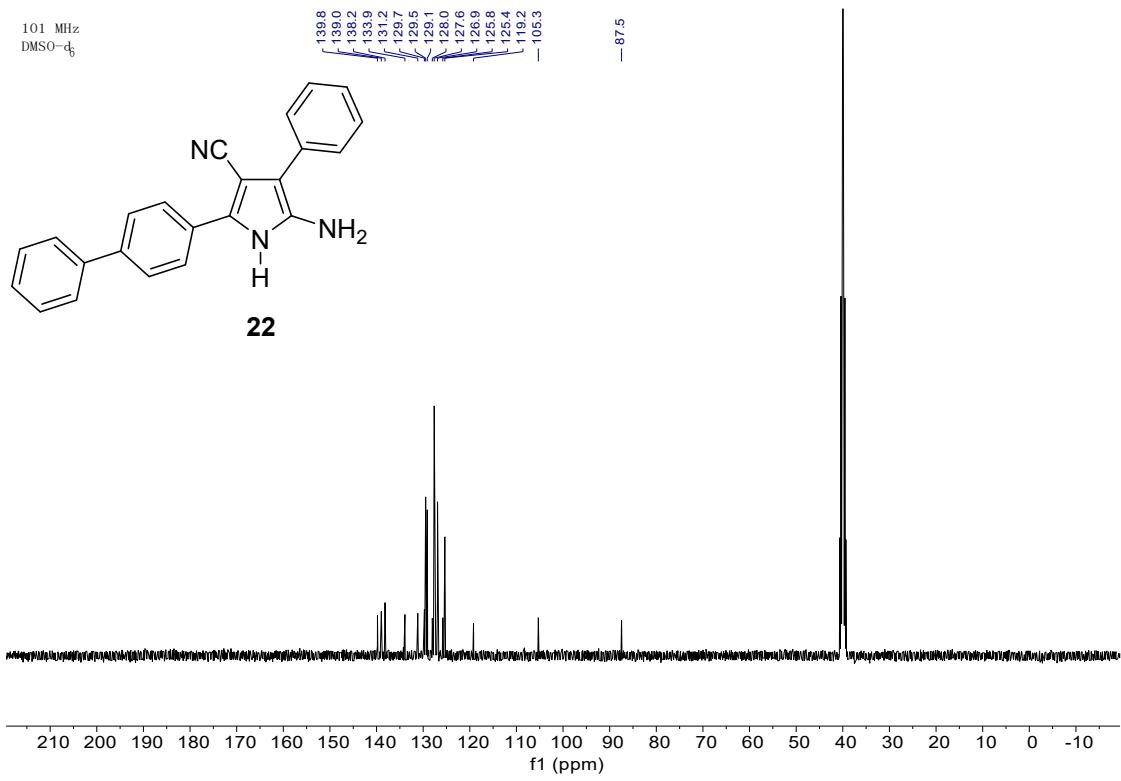

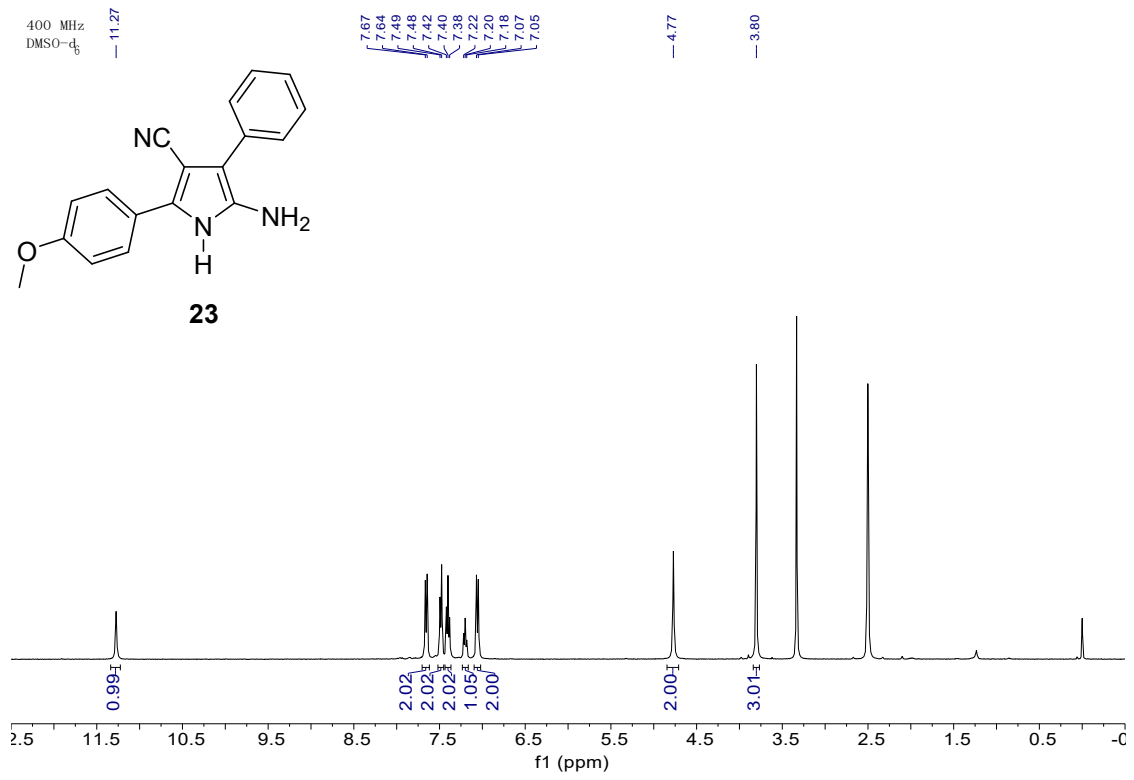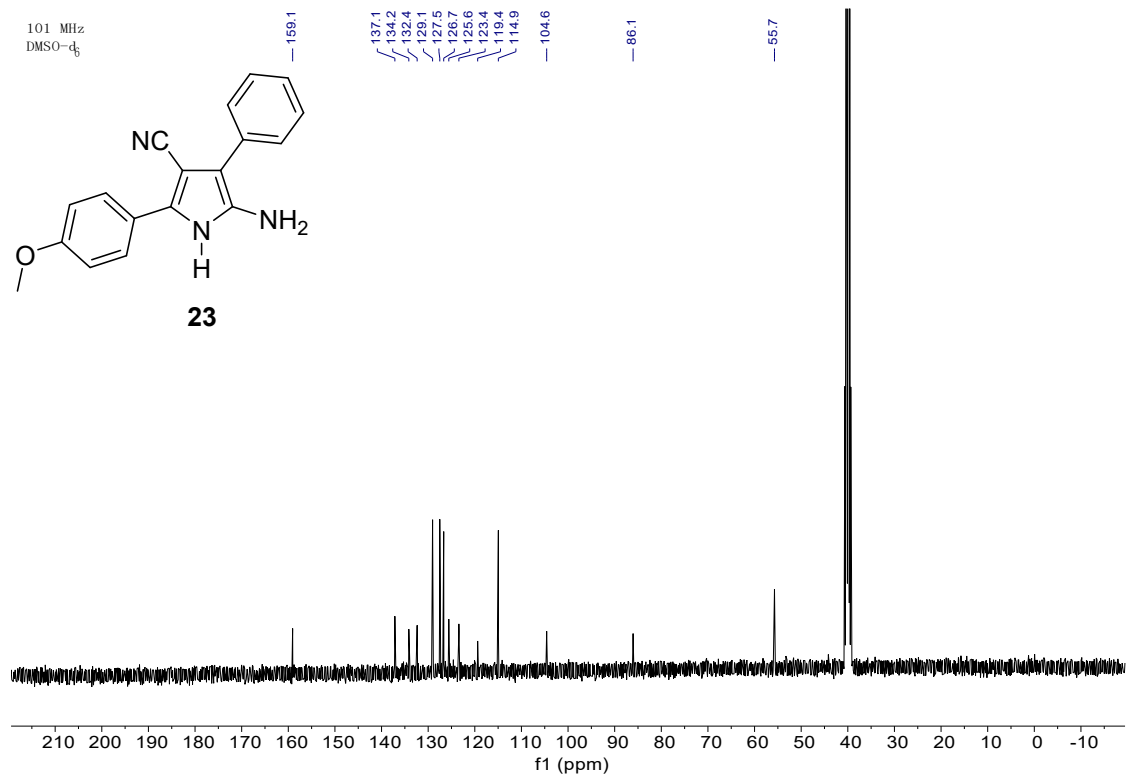



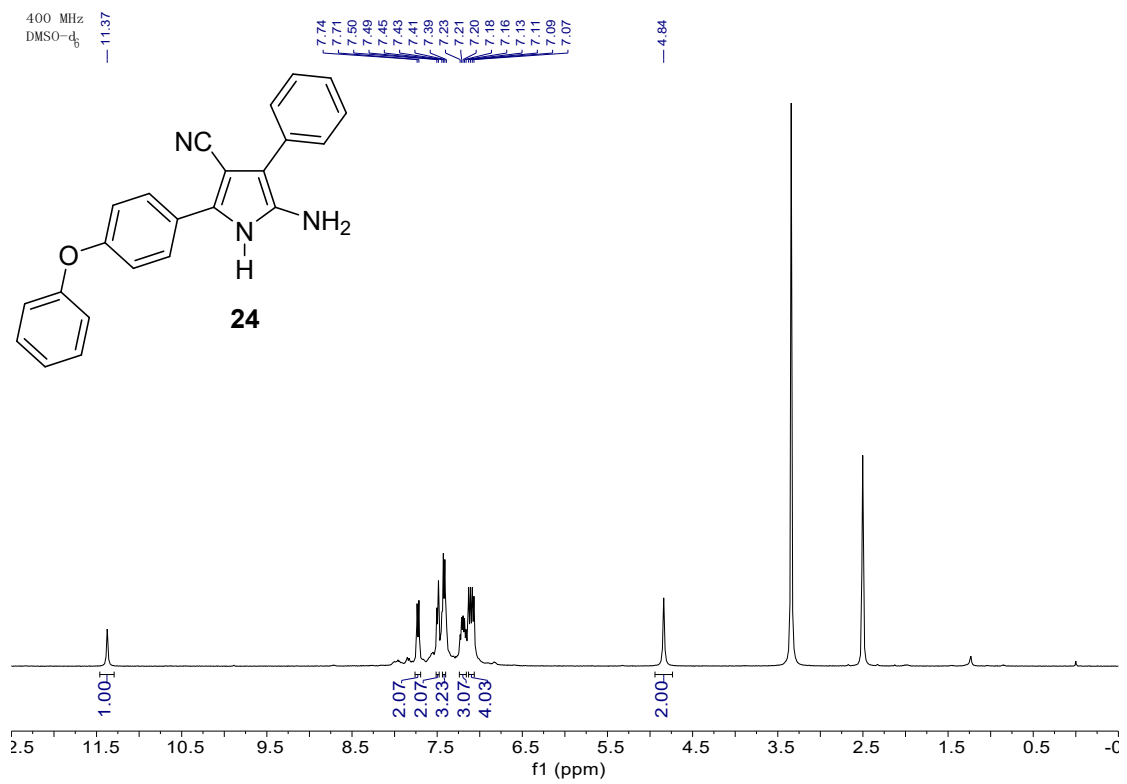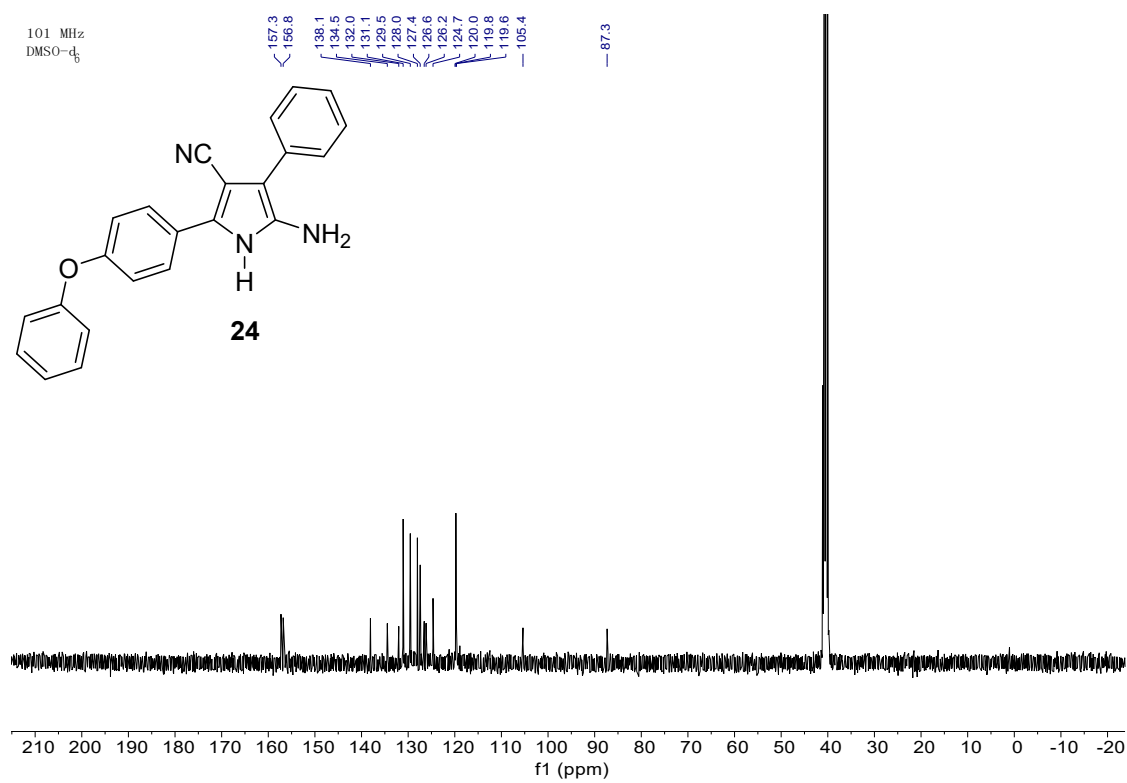

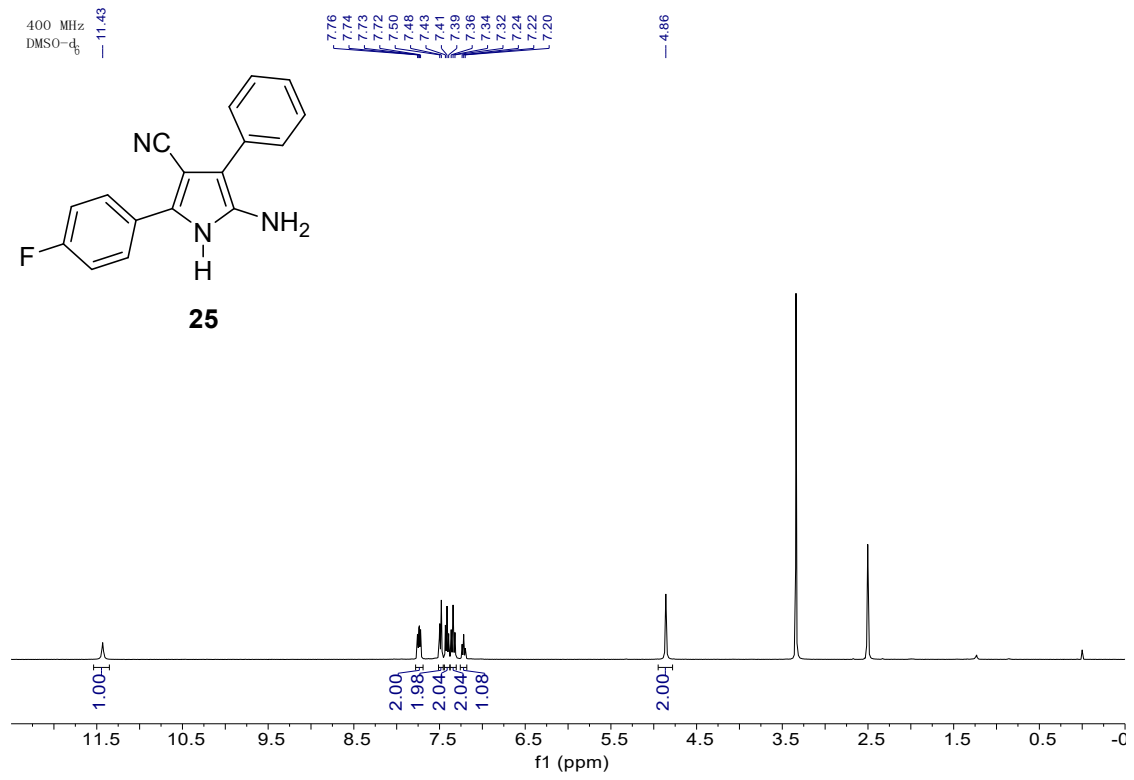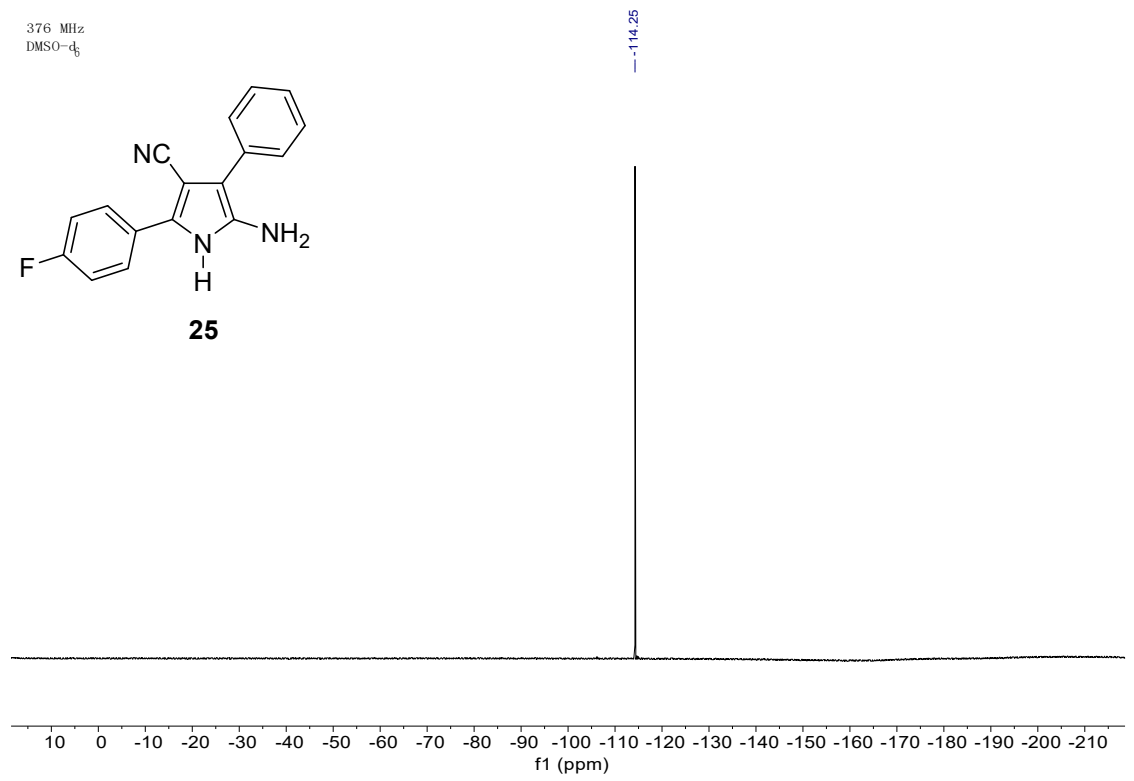

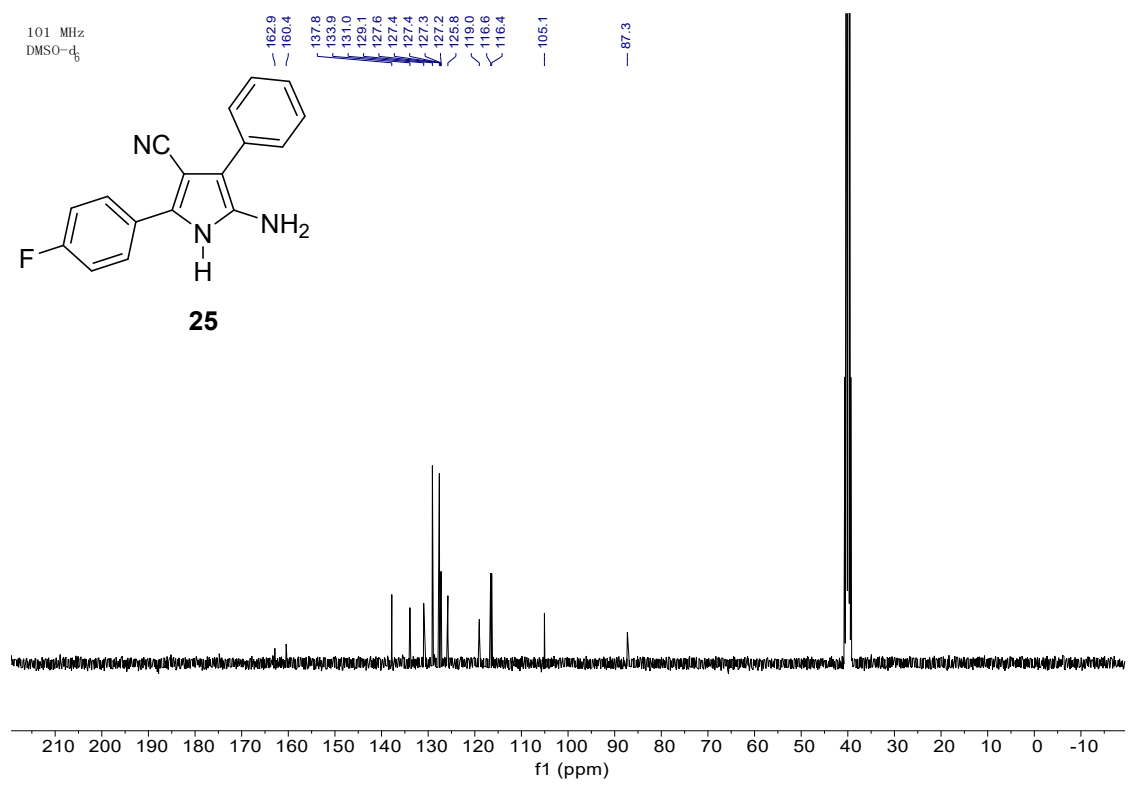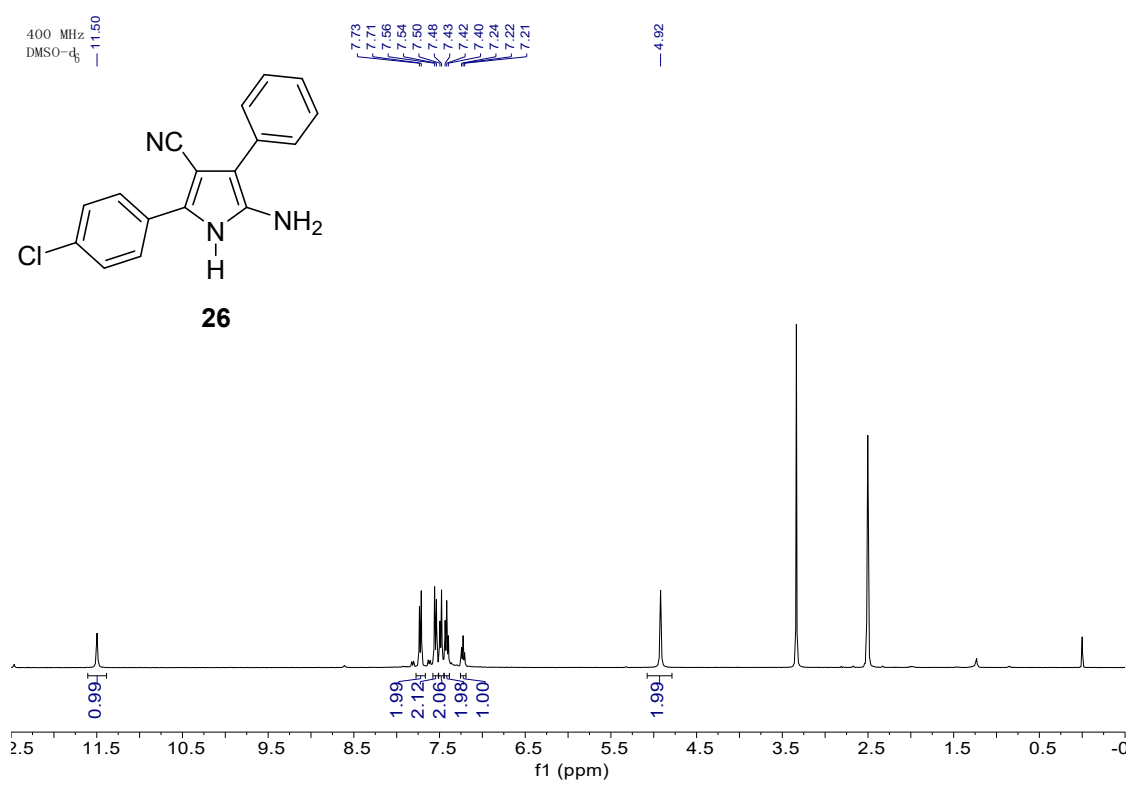

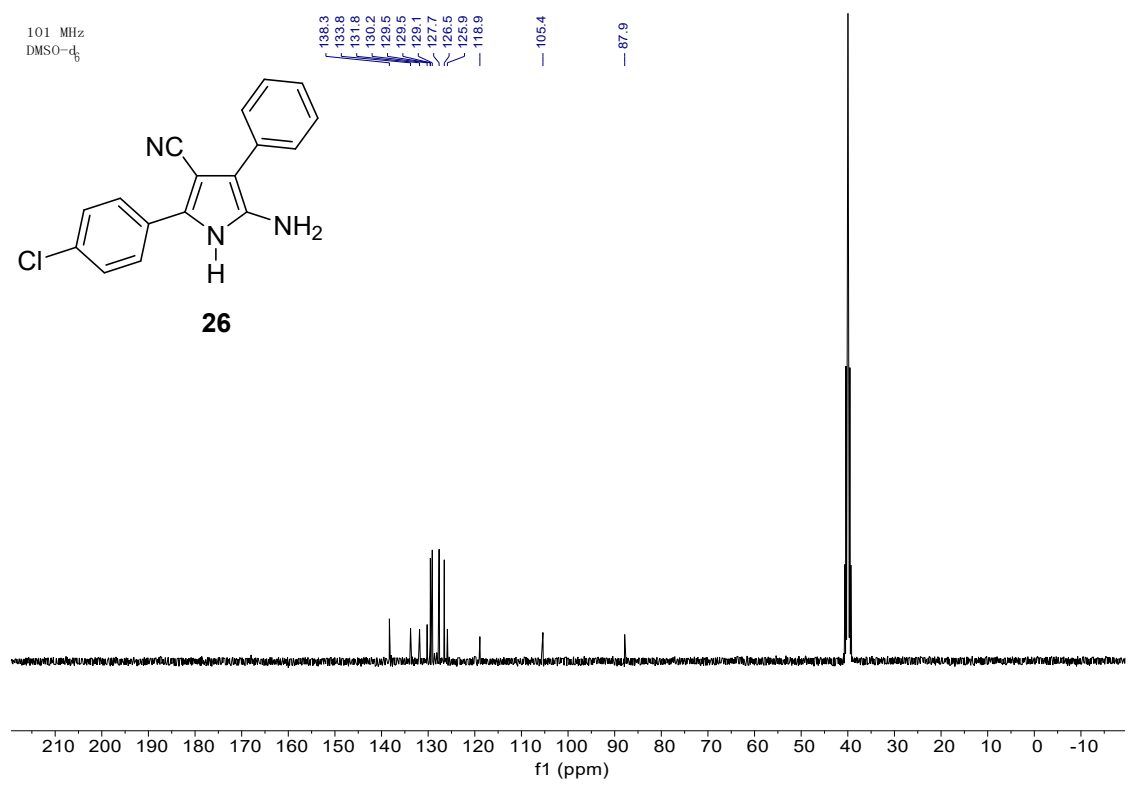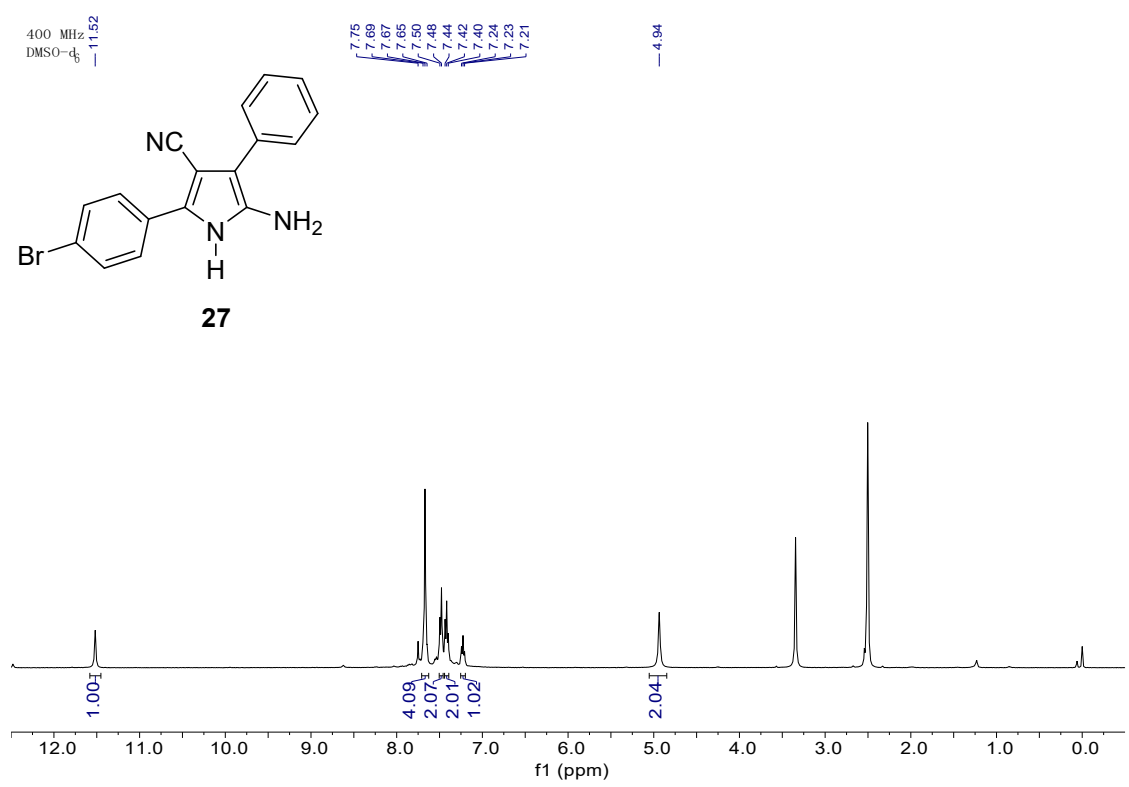

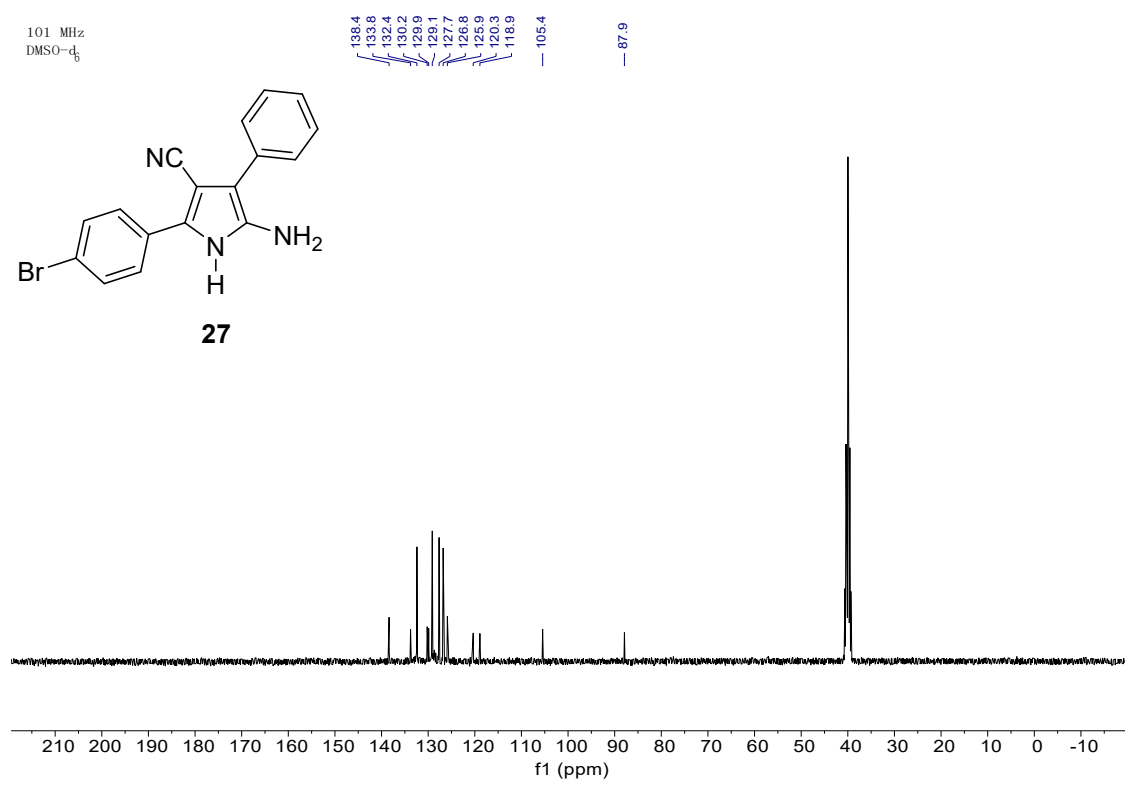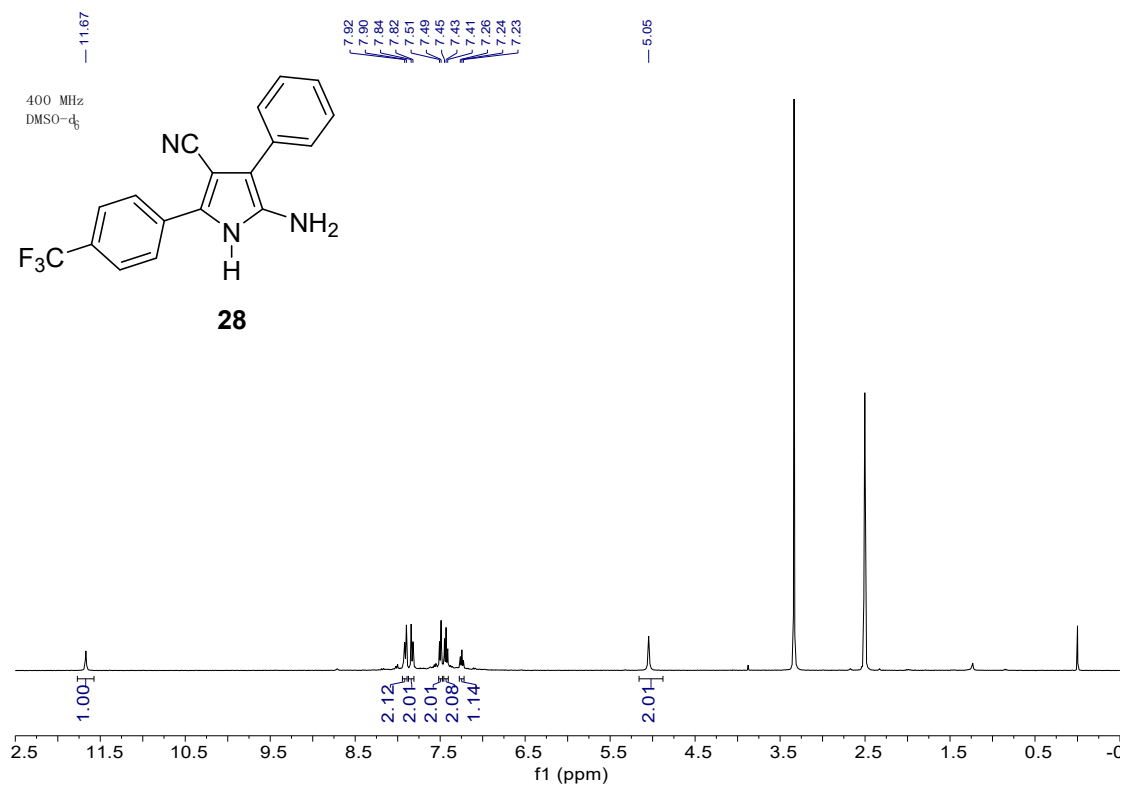

376 MHz  
DMSO-d<sub>6</sub>

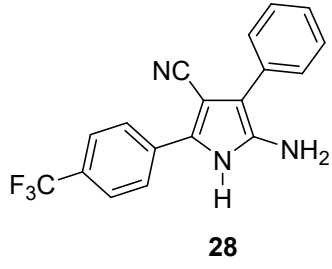

-56.09

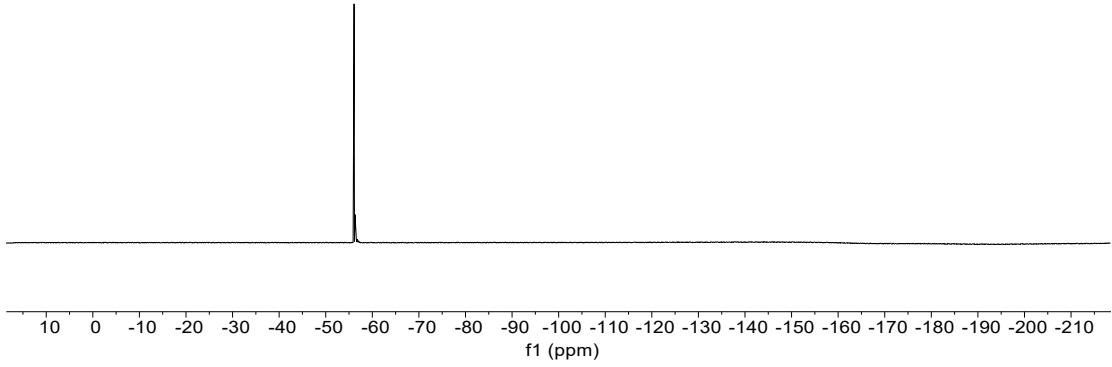

101 MHz  
DMSO-d<sub>6</sub>

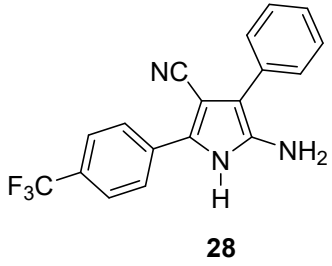

139.2  
134.4  
133.5  
129.2  
129.1  
128.7  
127.8  
127.2  
127.0  
126.9  
126.5  
125.0  
123.4  
118.7  
106.1

89.2

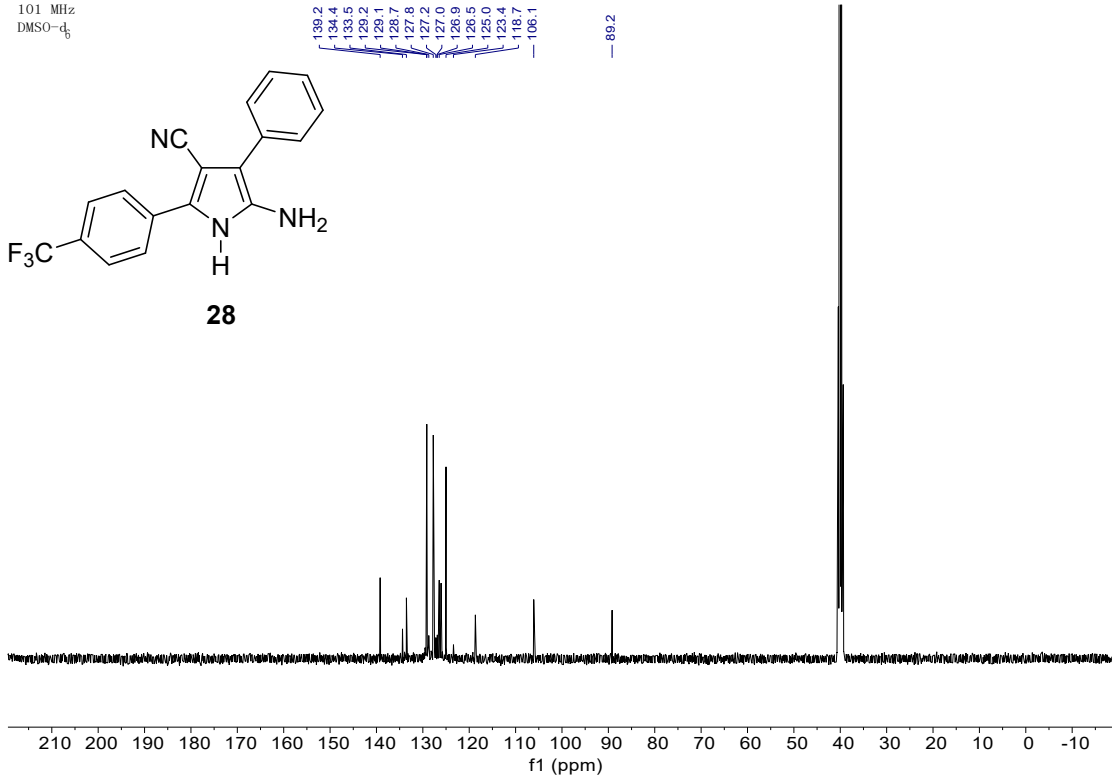

400 MHz  
DMSO-d<sub>6</sub>

7.92  
7.88  
7.43  
7.38  
7.19

5.06

3.19

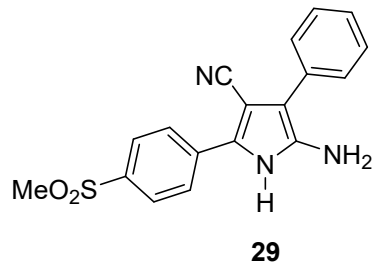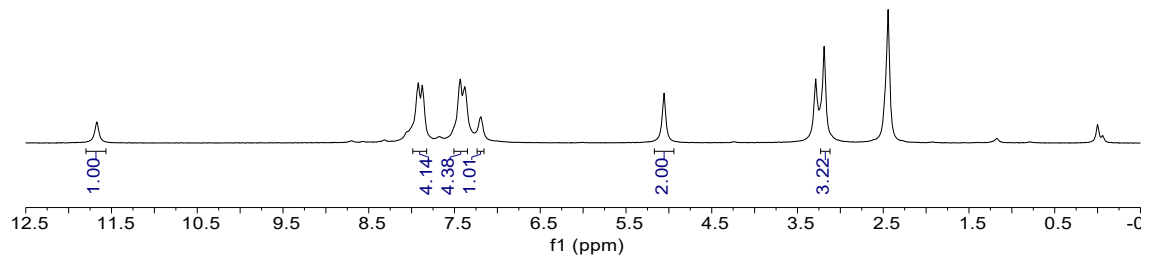

101 MHz  
DMSO-d<sub>6</sub>

139.6  
138.5  
135.2  
133.4  
129.2  
128.8  
128.3  
127.8  
126.2  
124.8  
118.6  
106.4

89.8

44.0

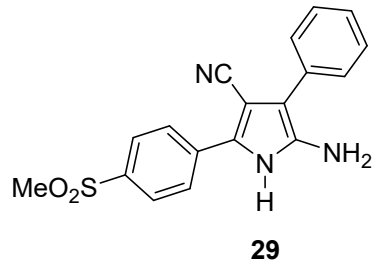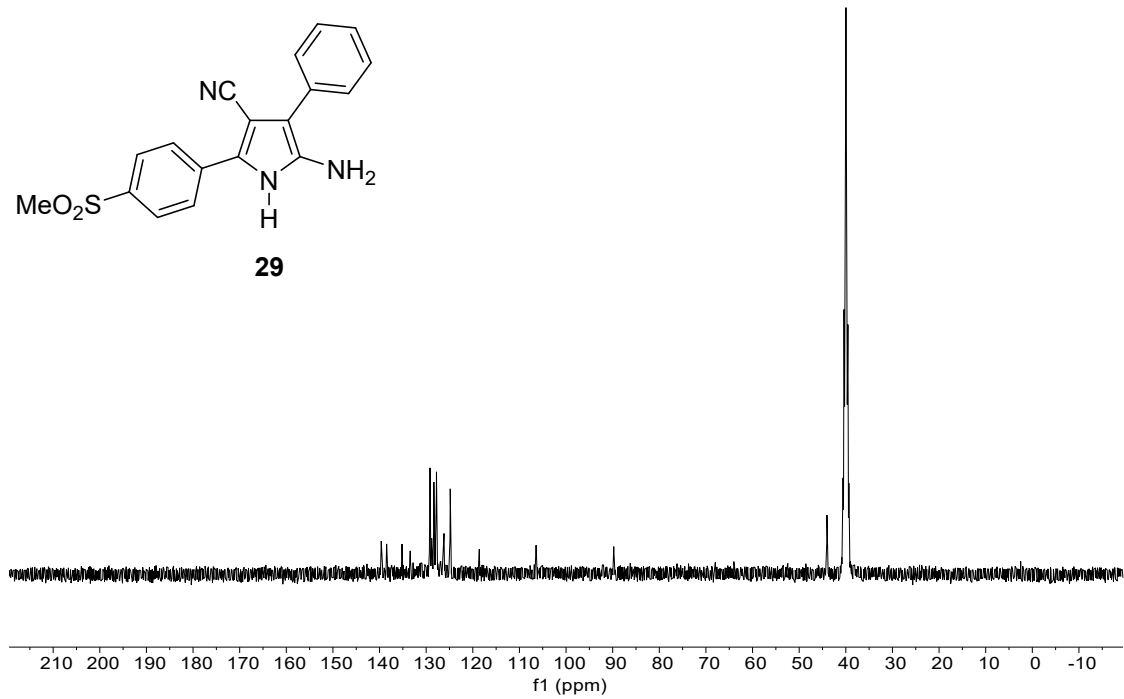

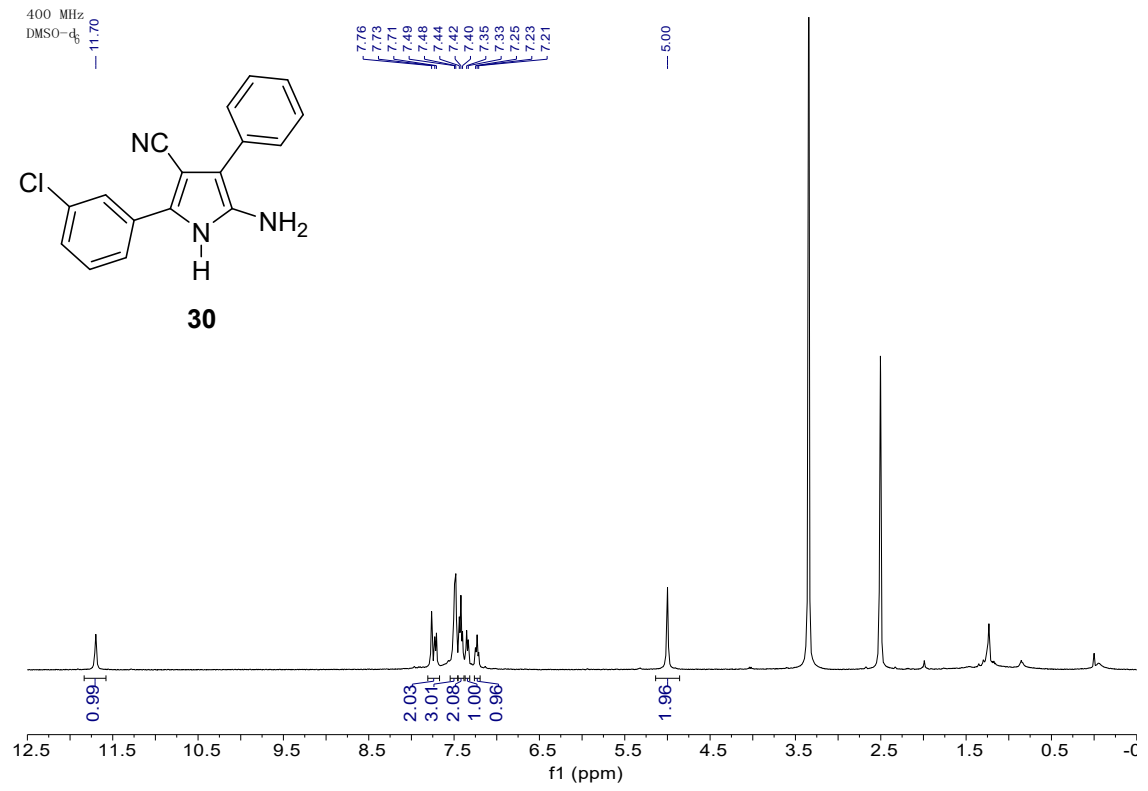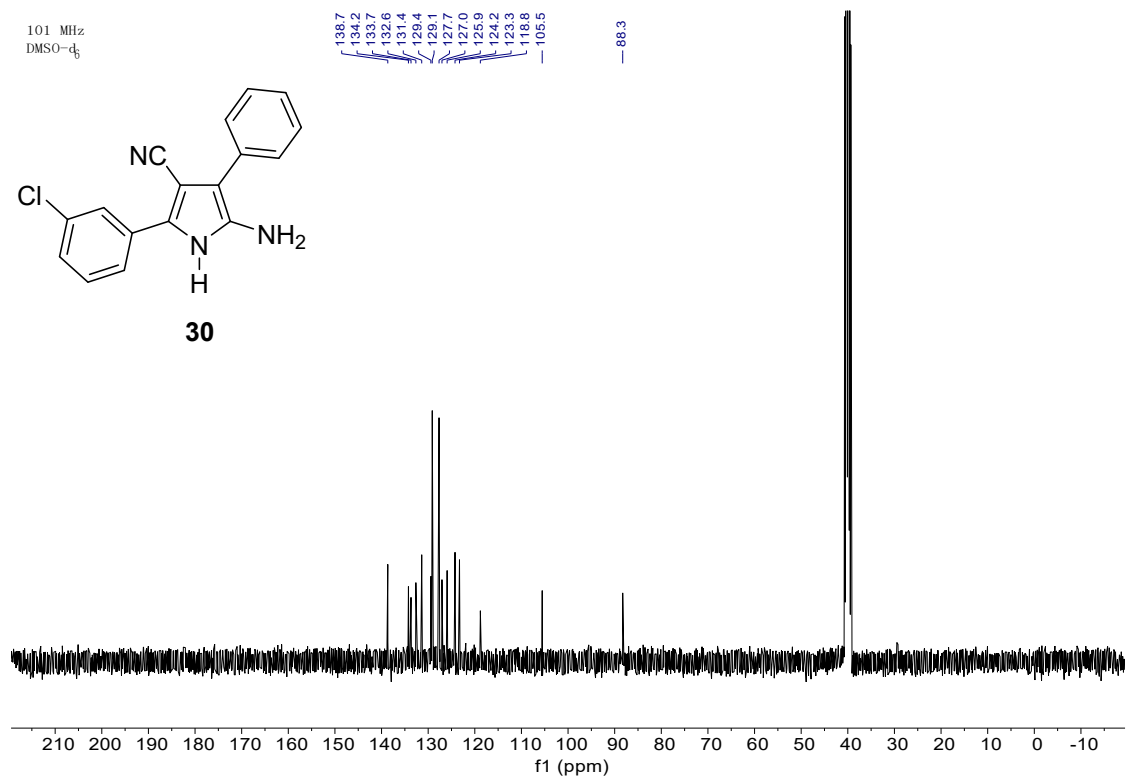



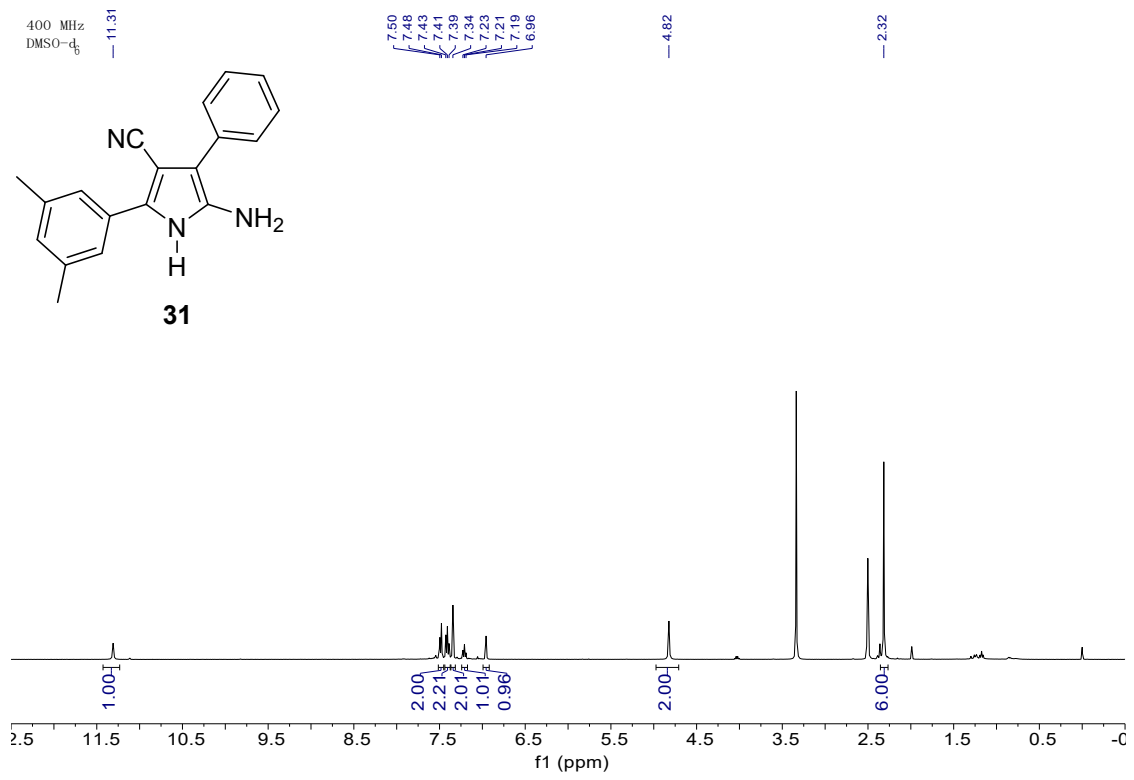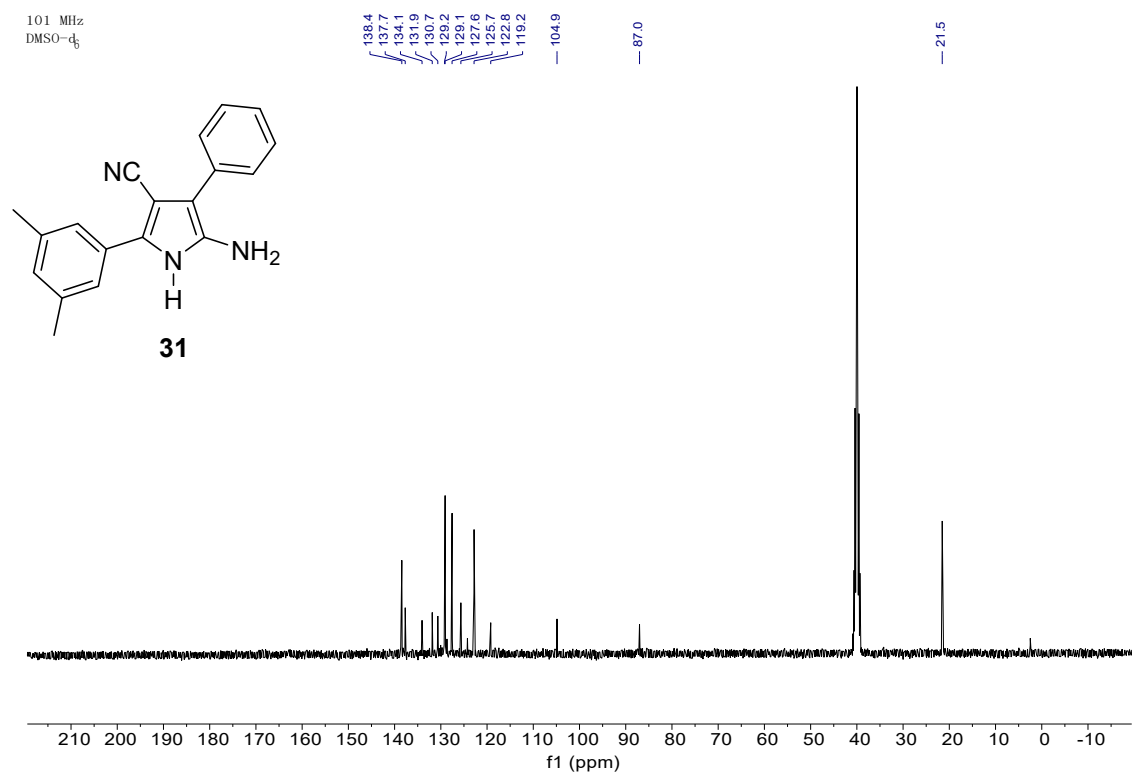

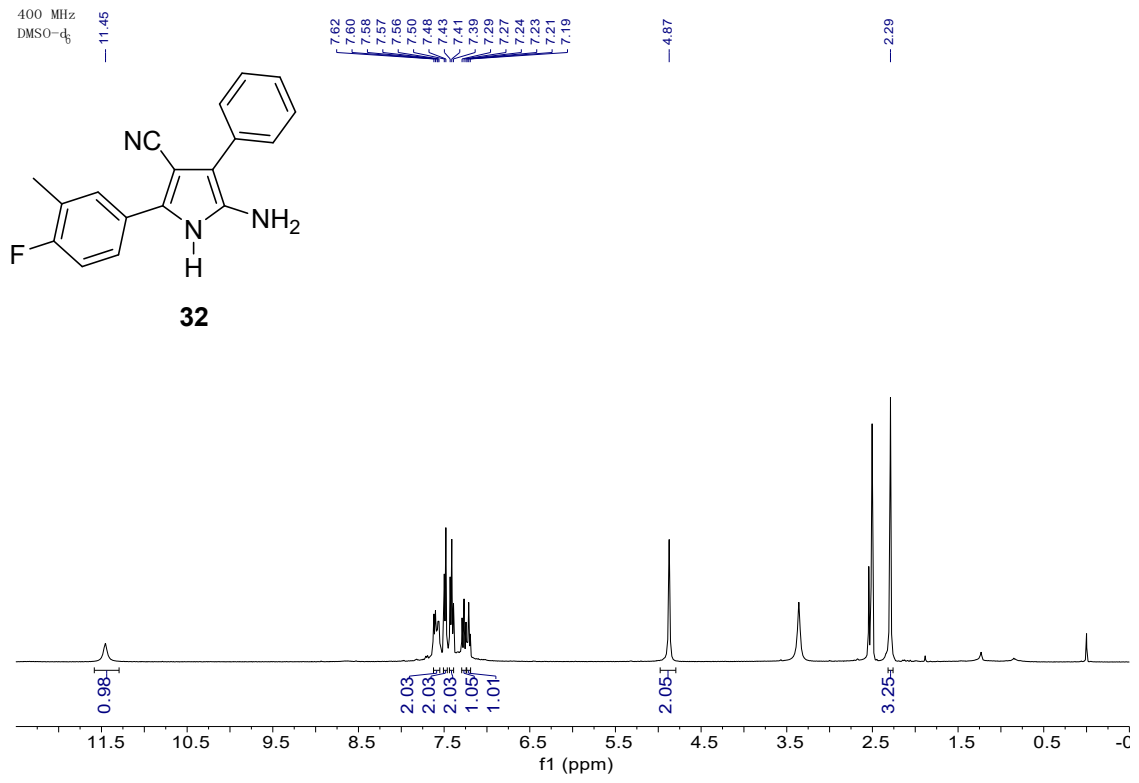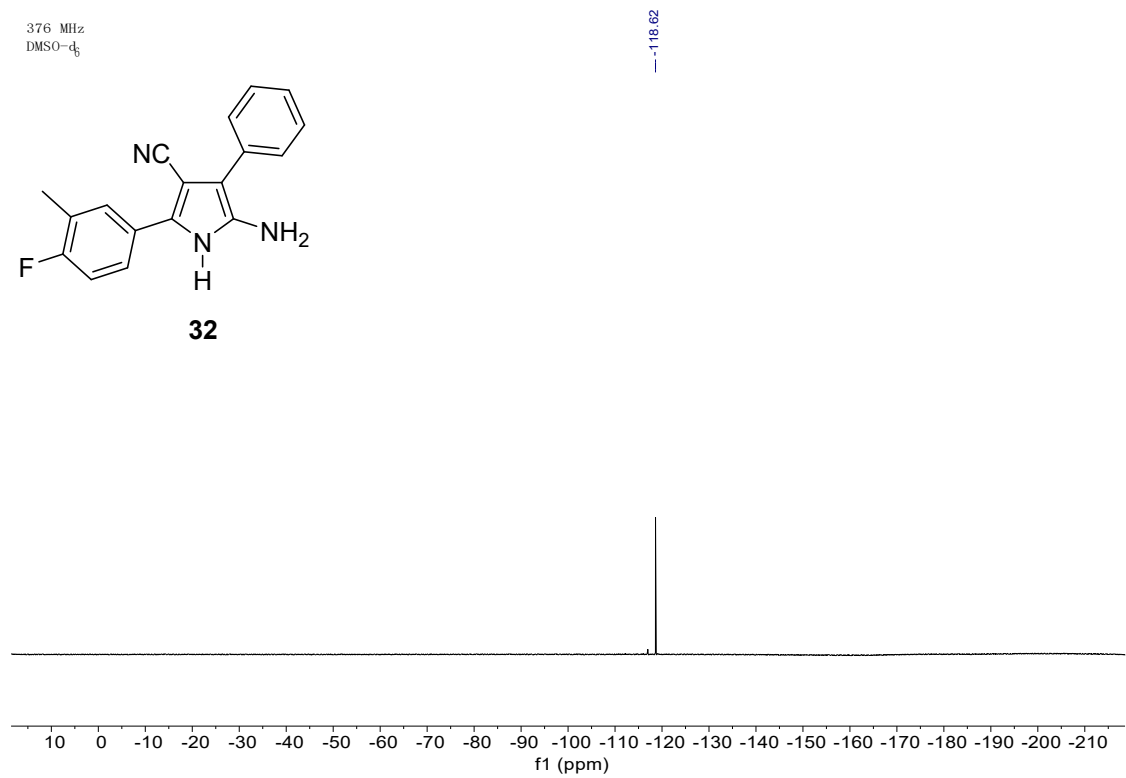

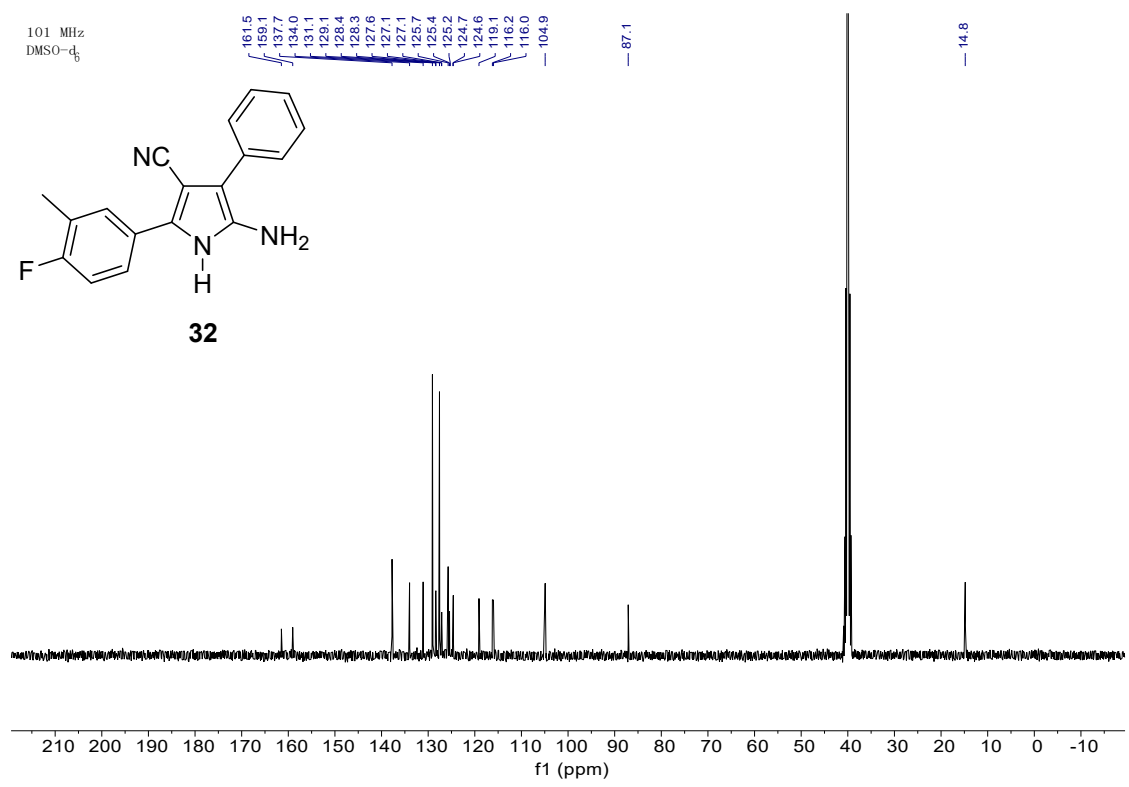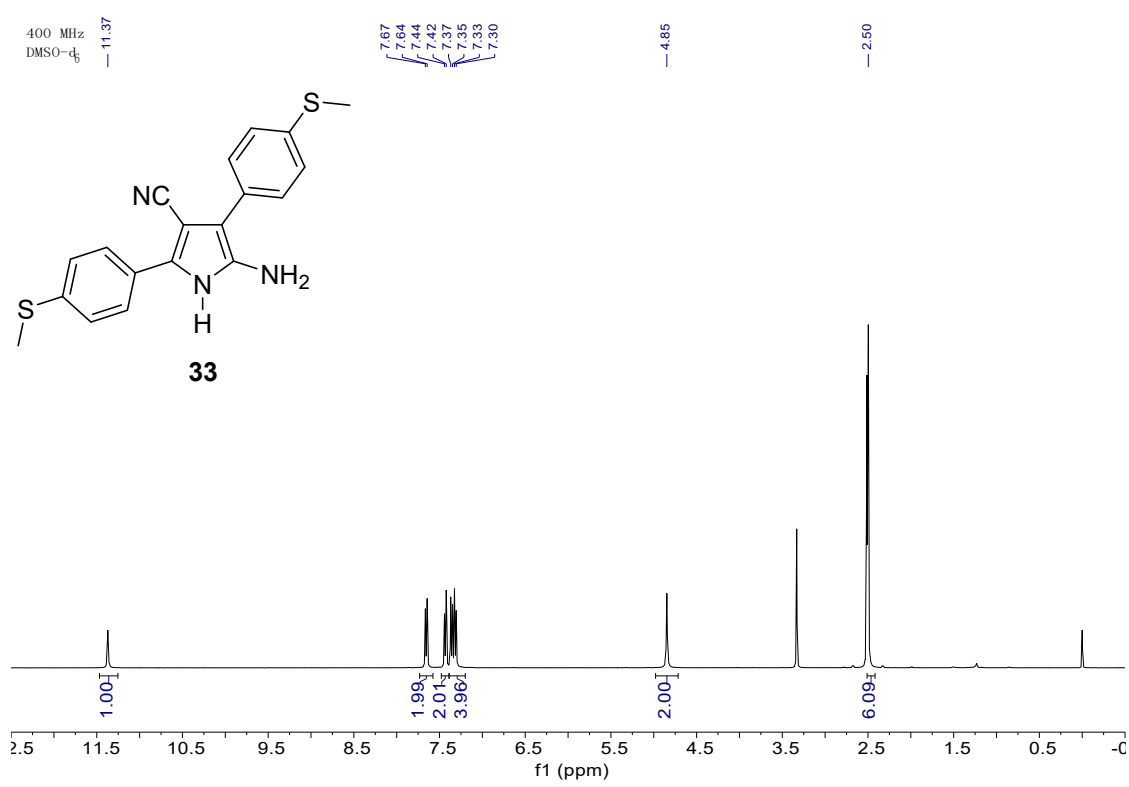

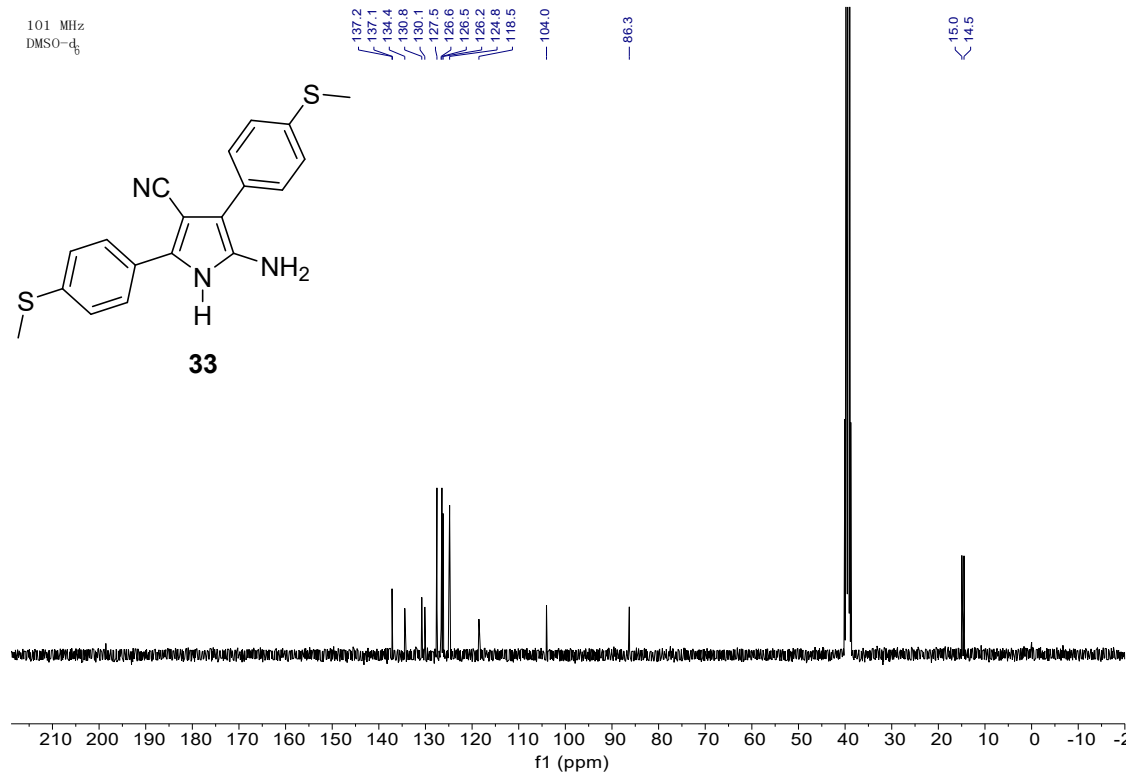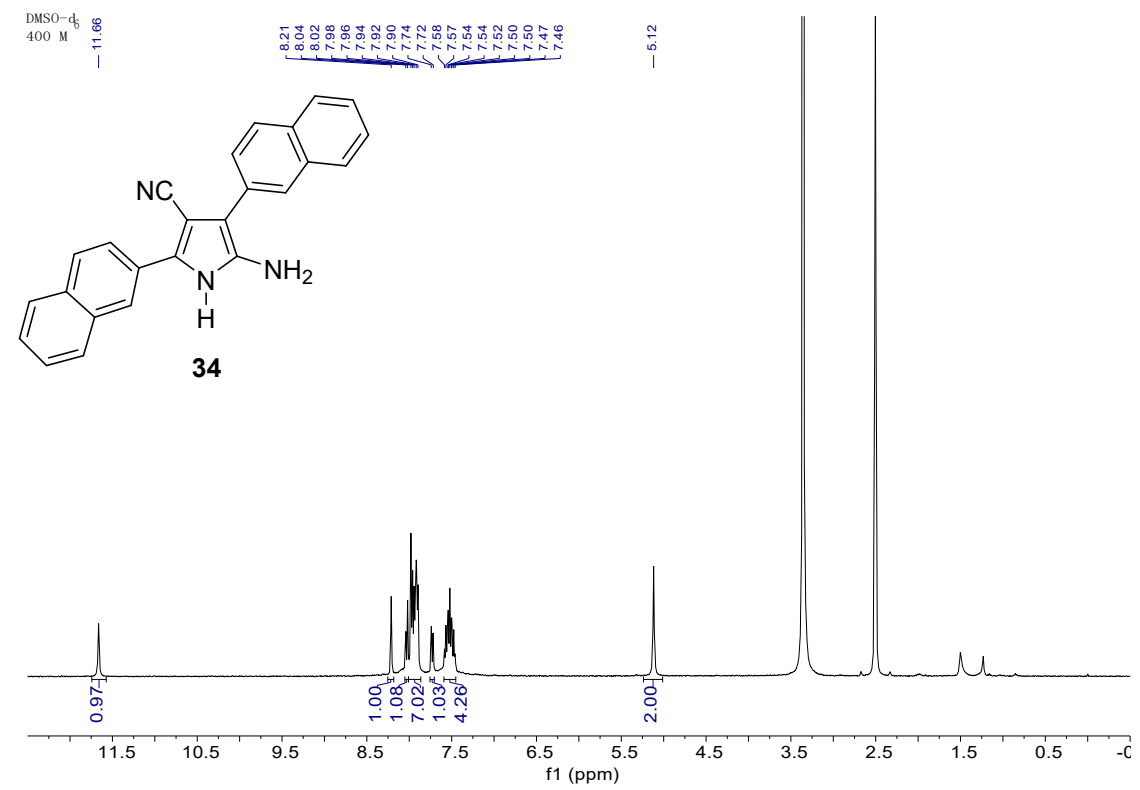

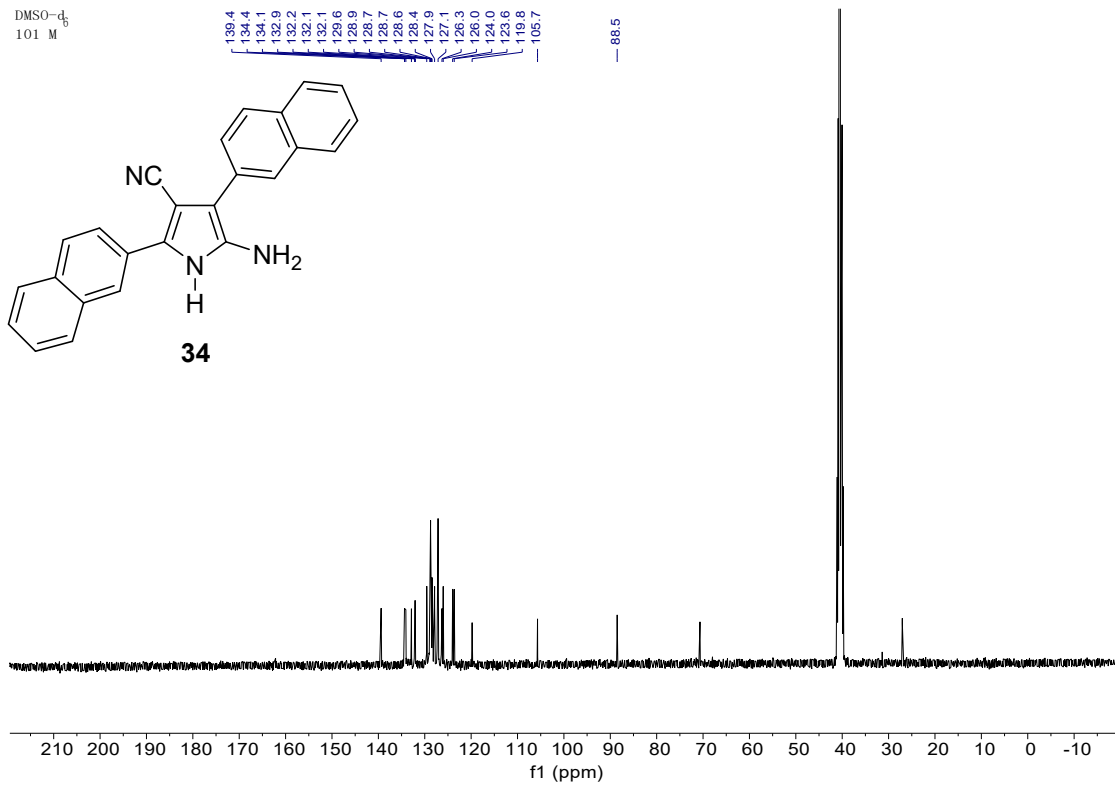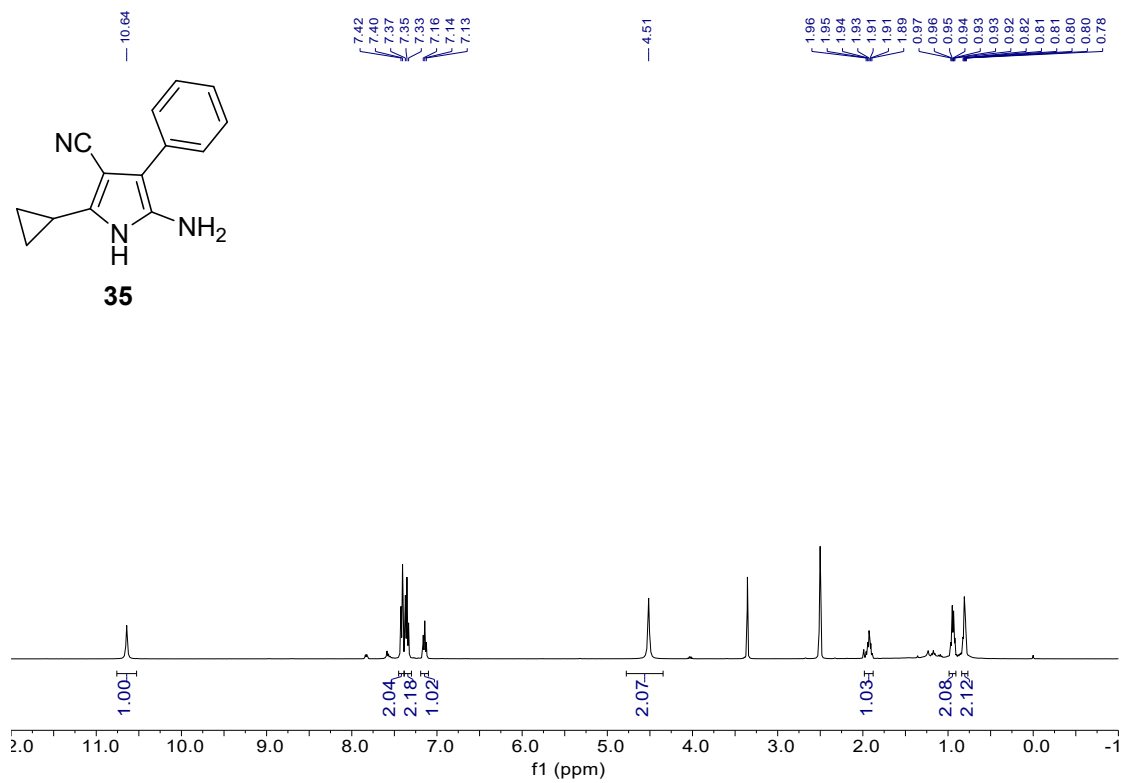

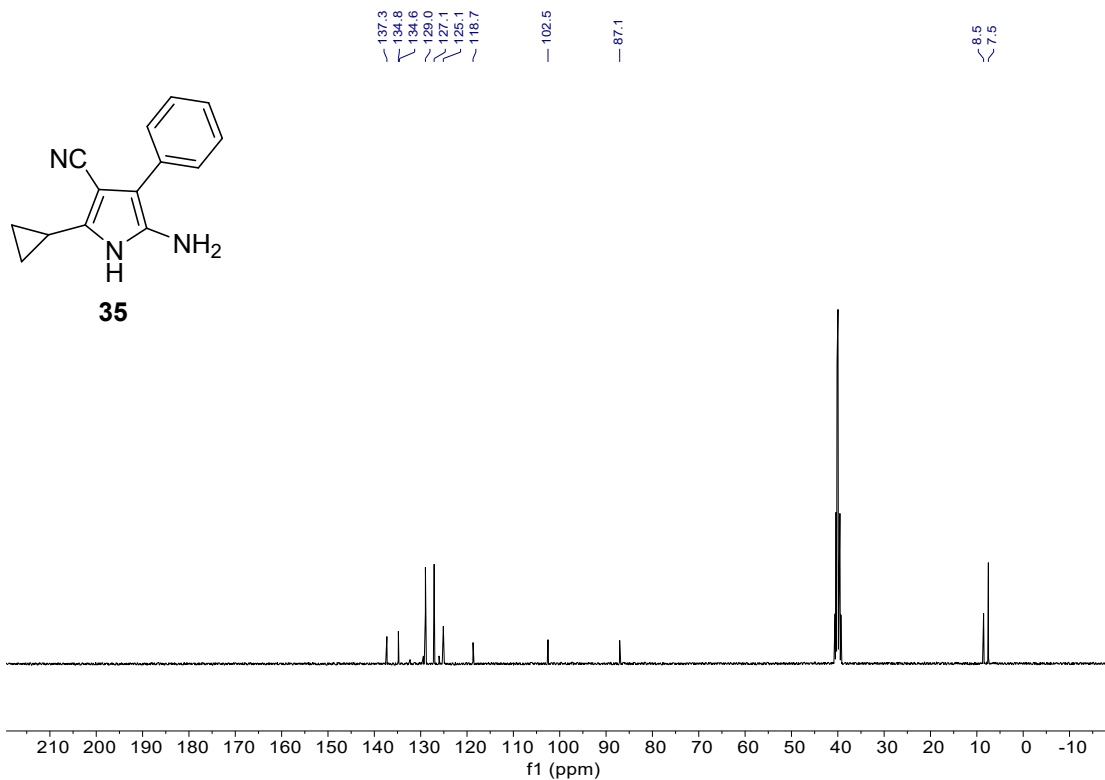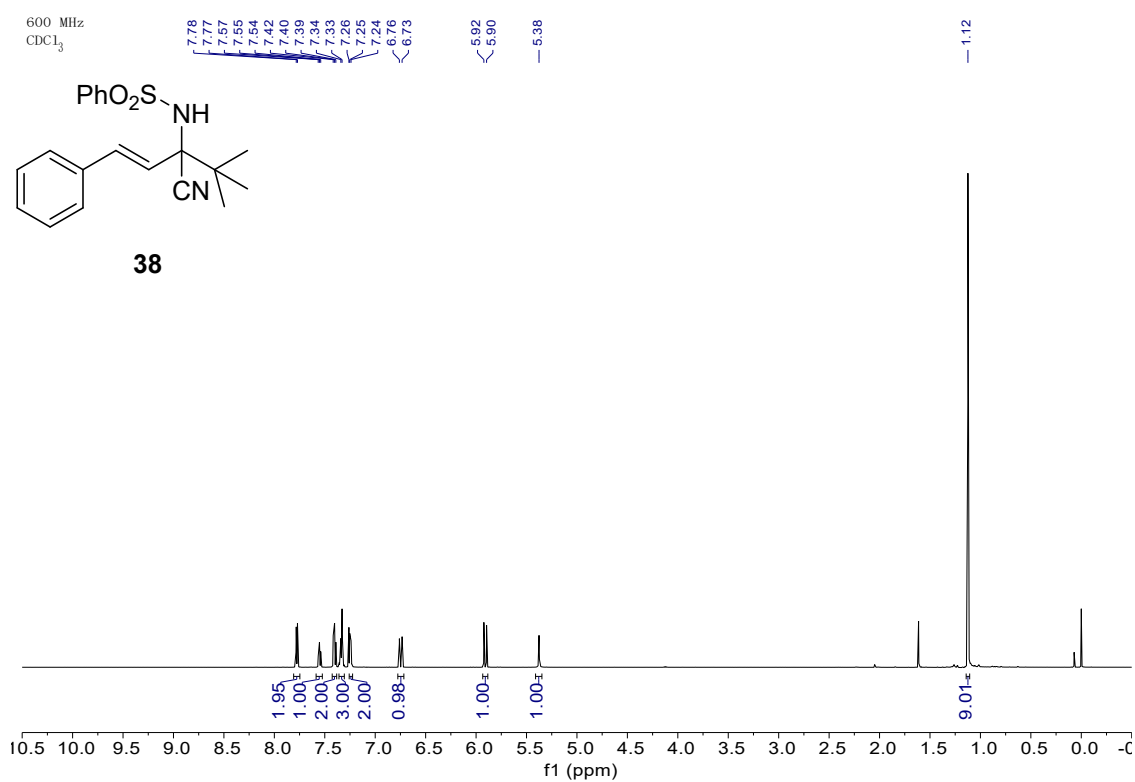

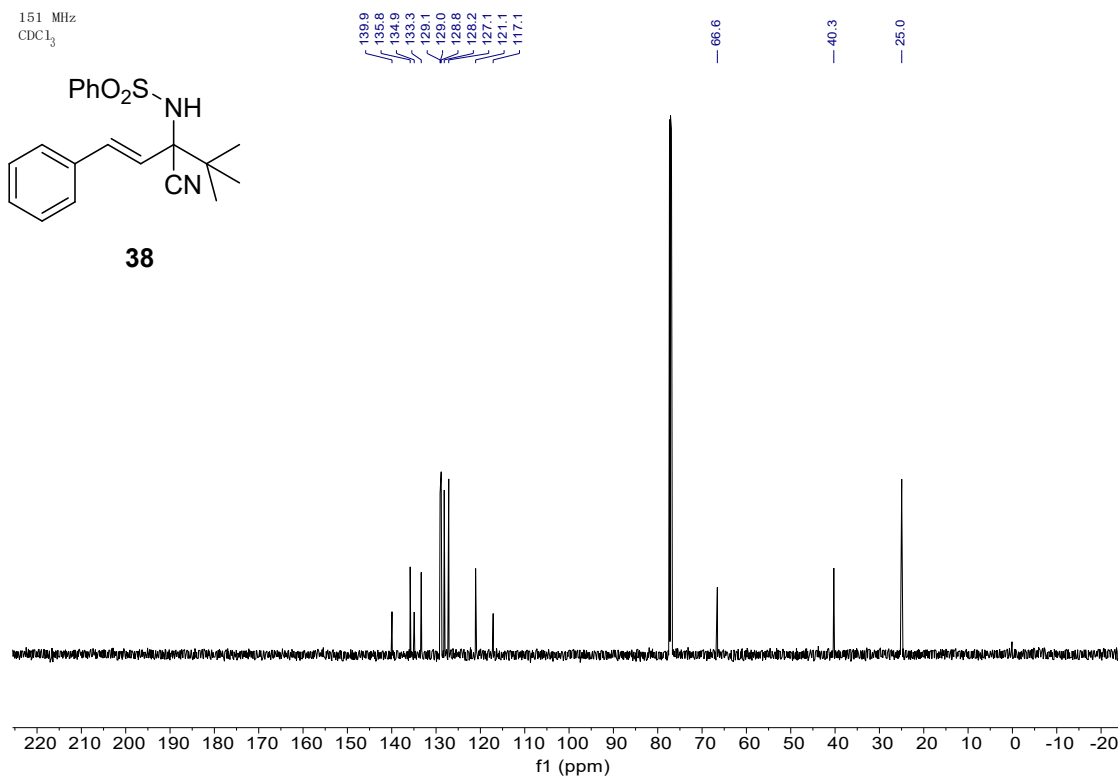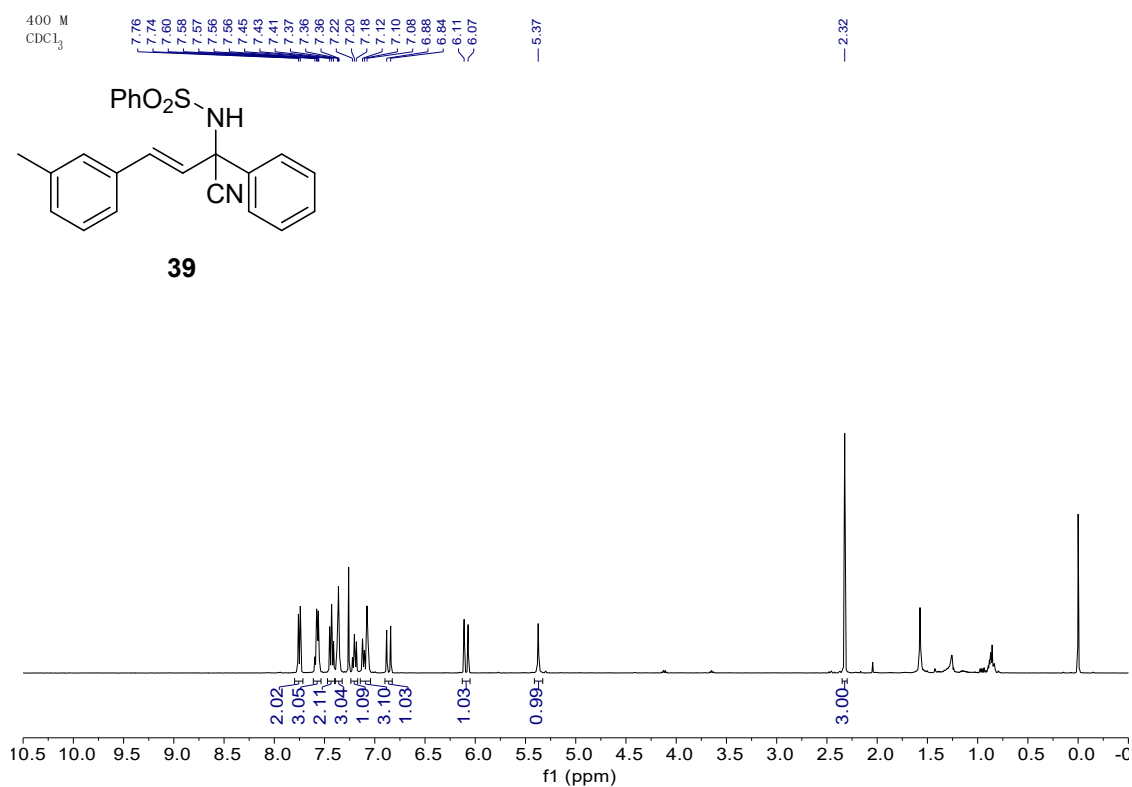

151 M  
CDCl<sub>3</sub>

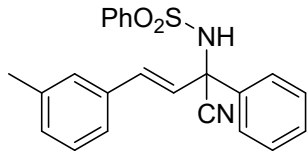

39

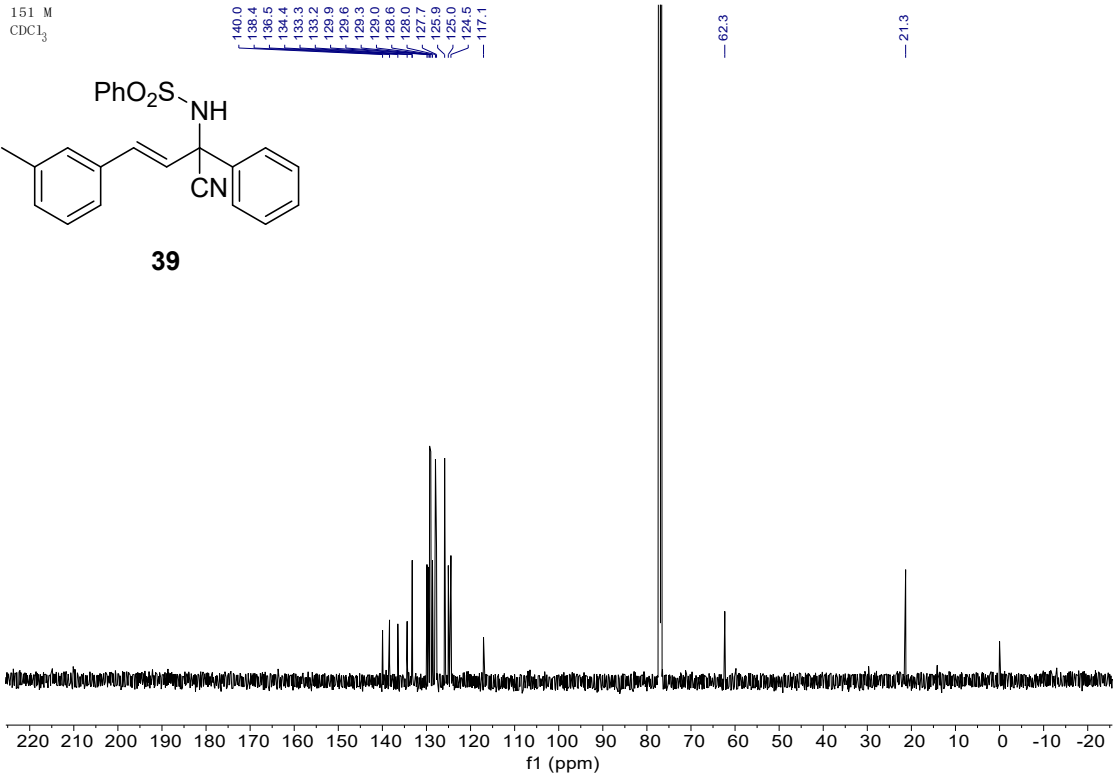



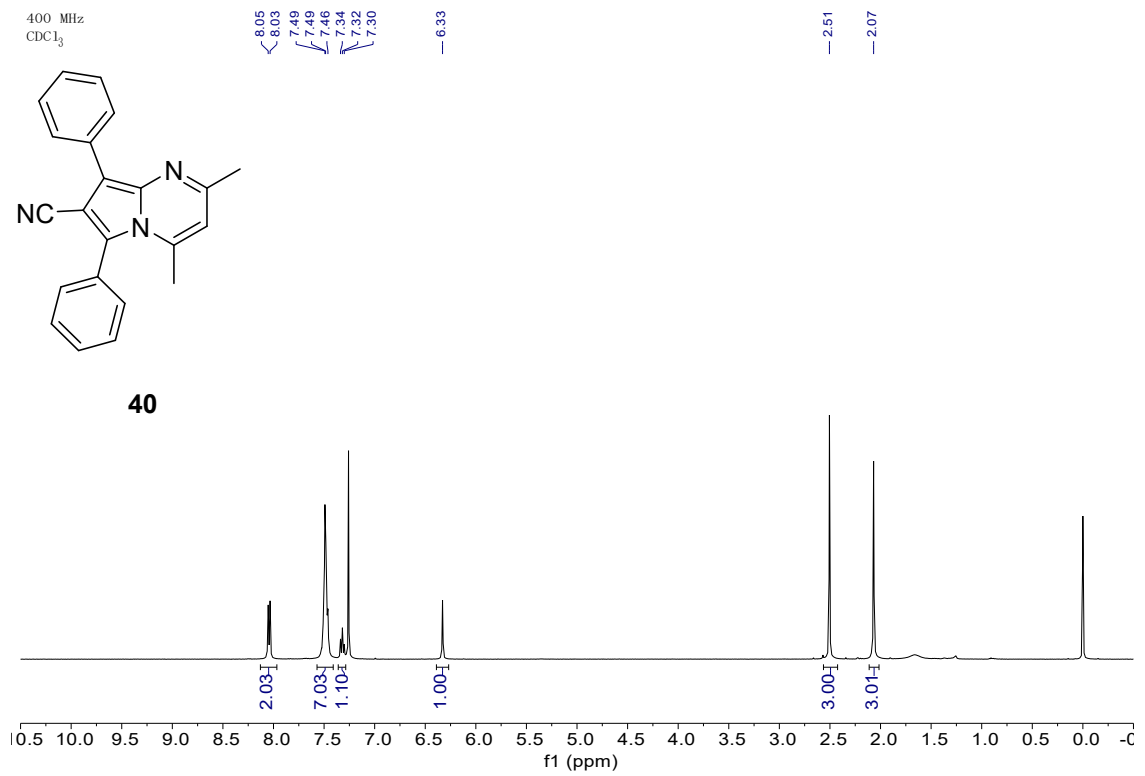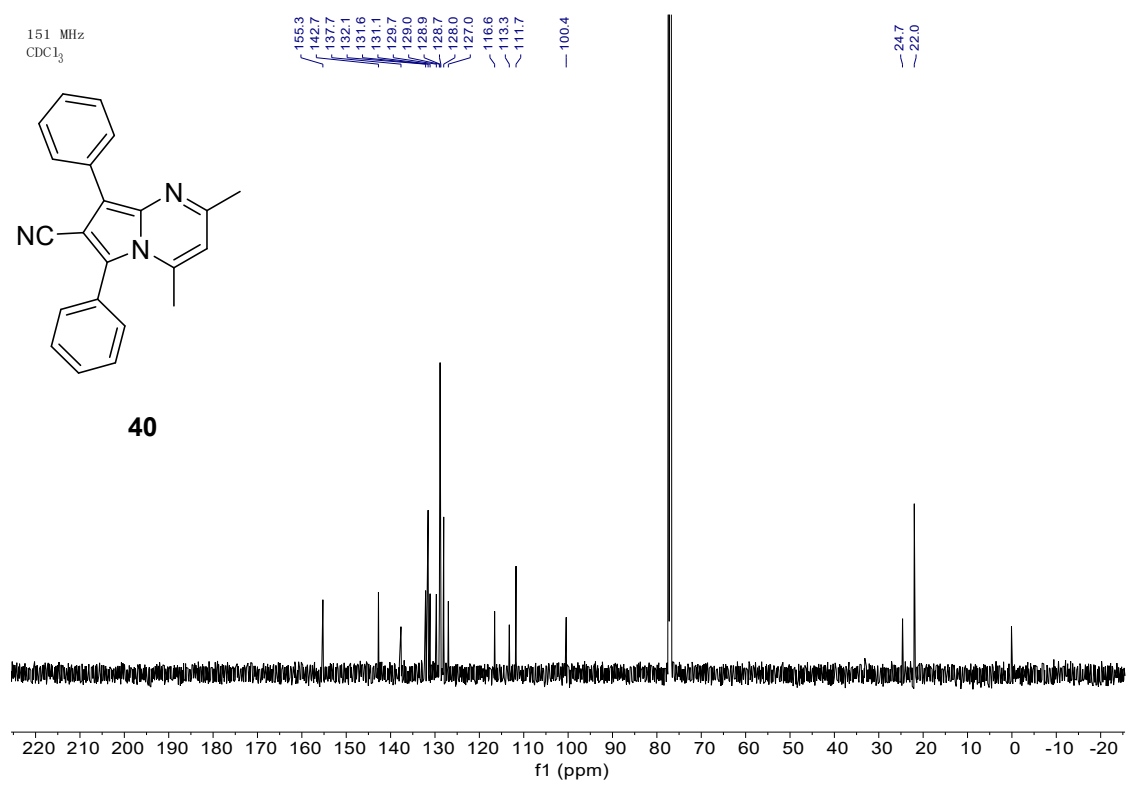

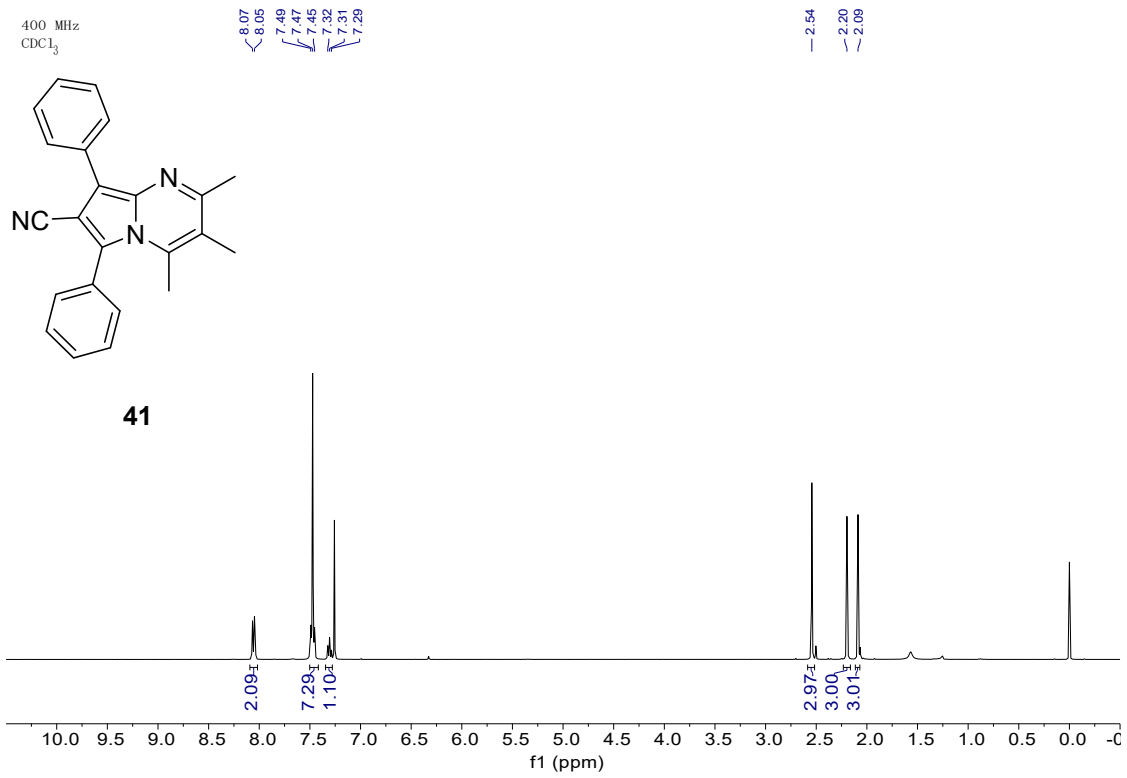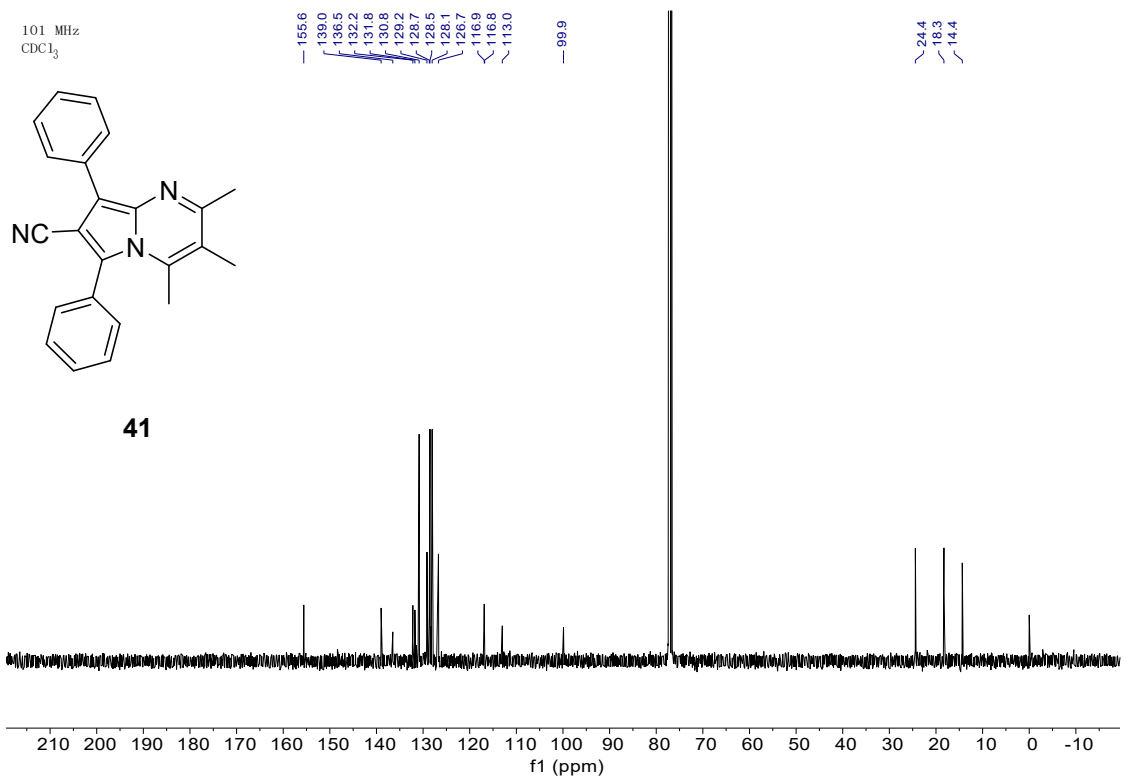

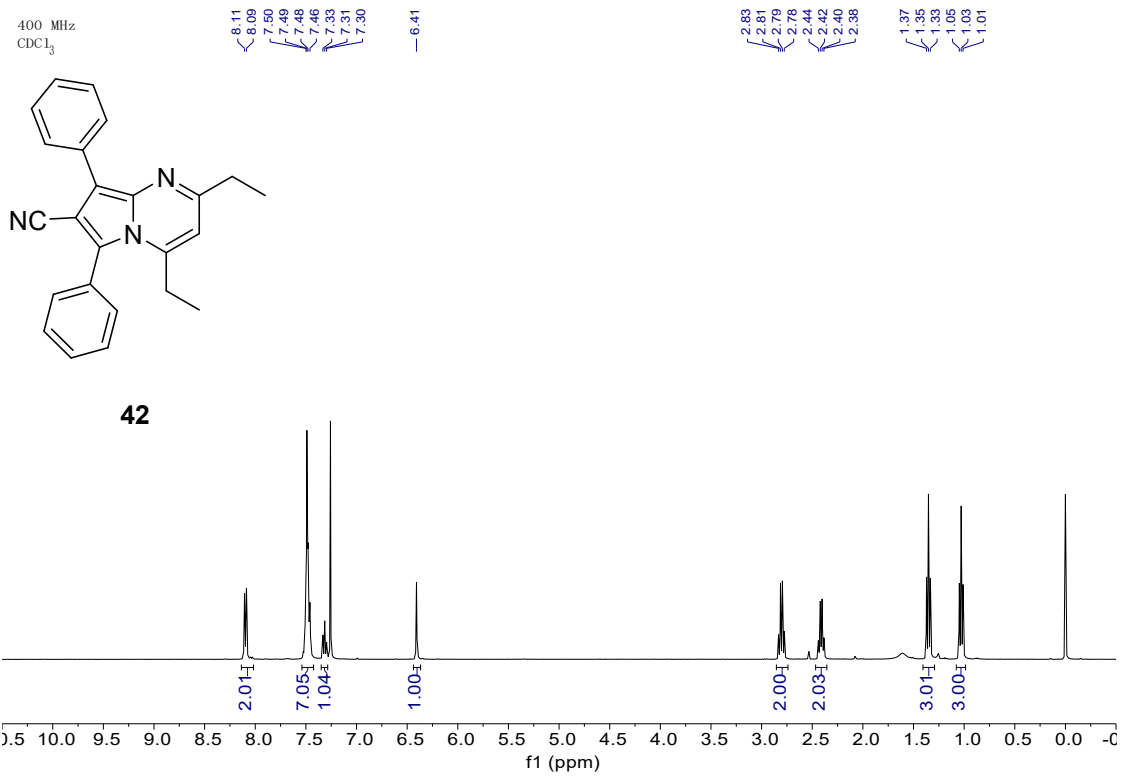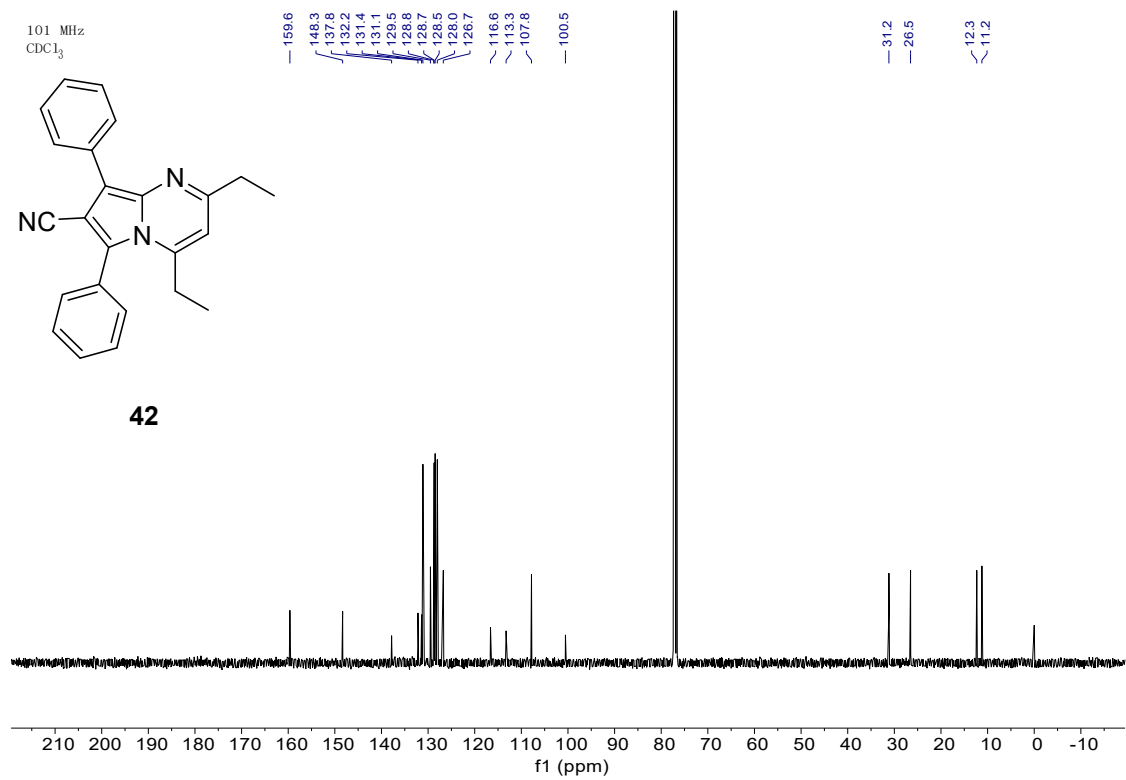

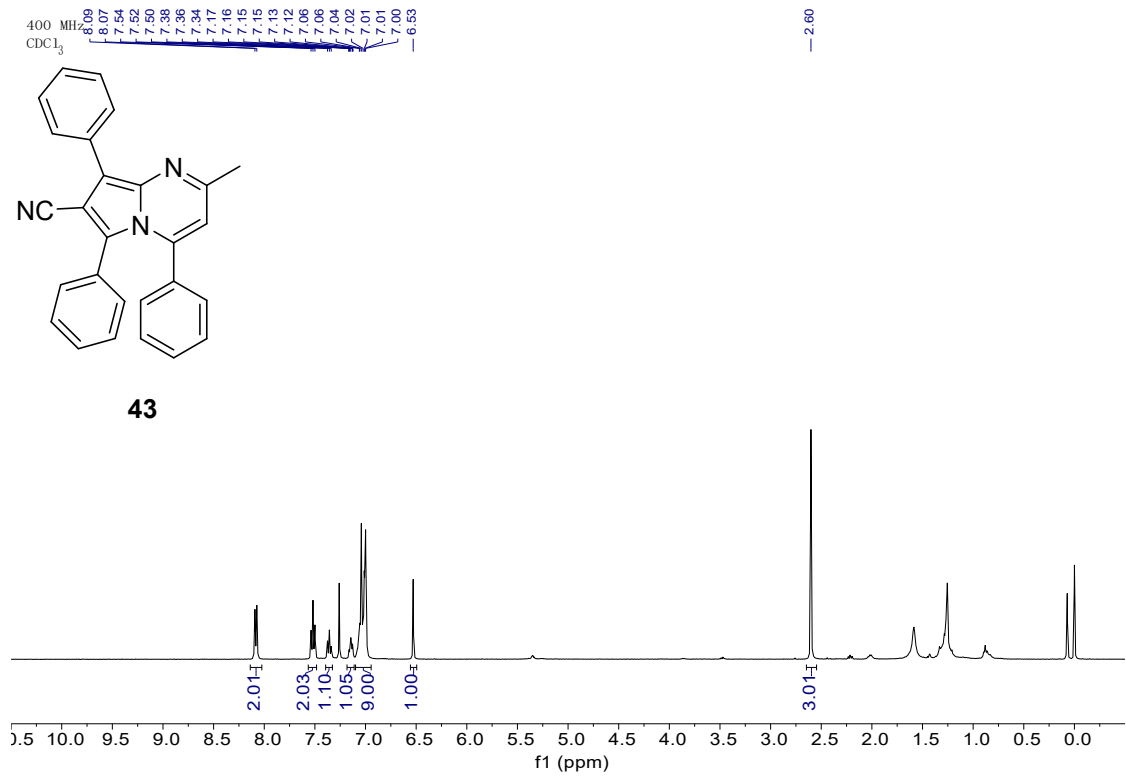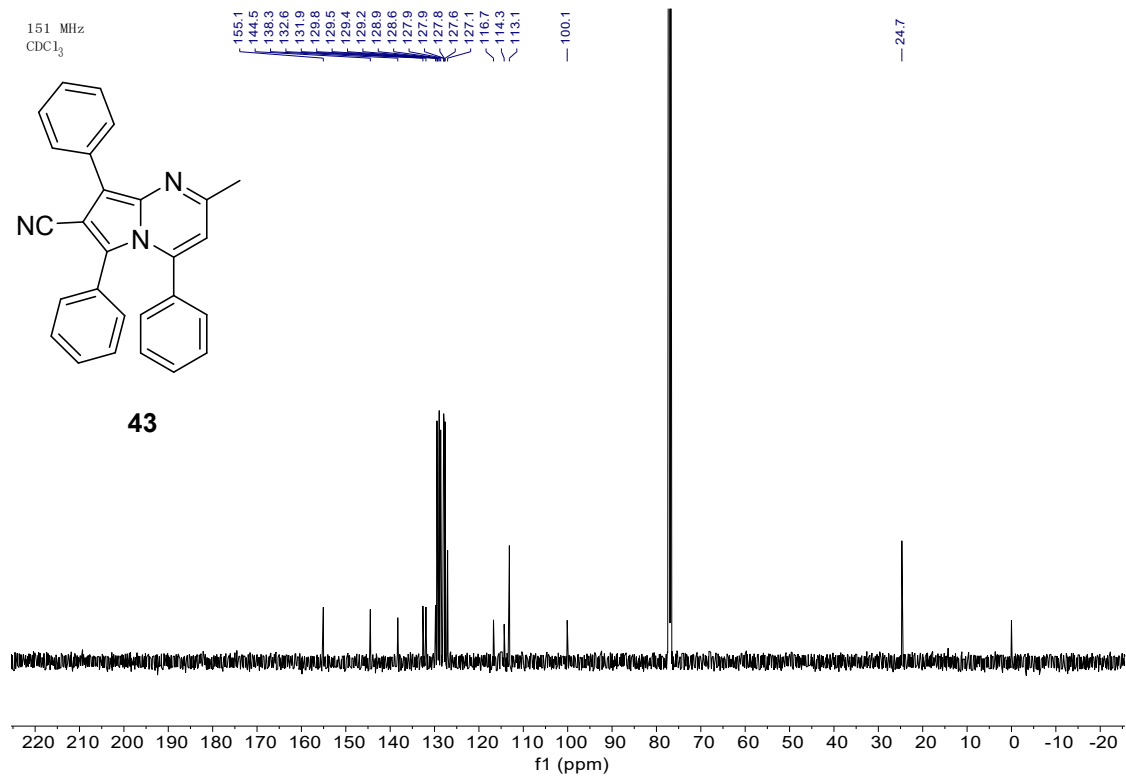

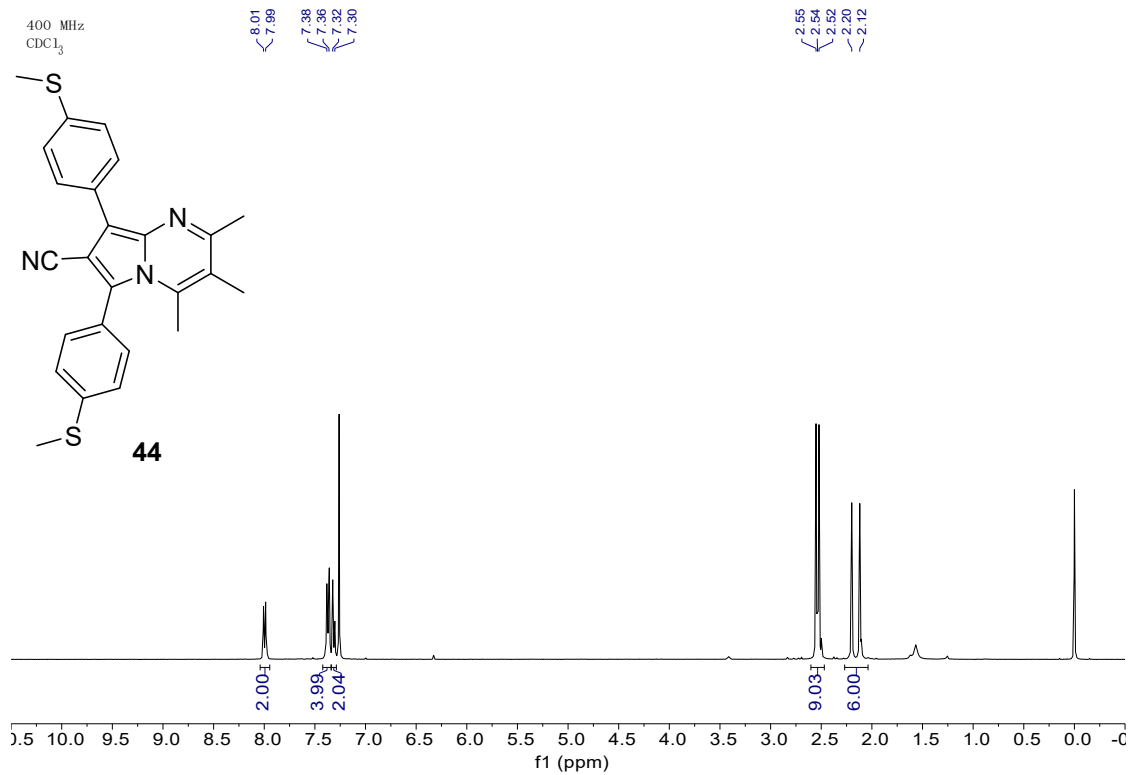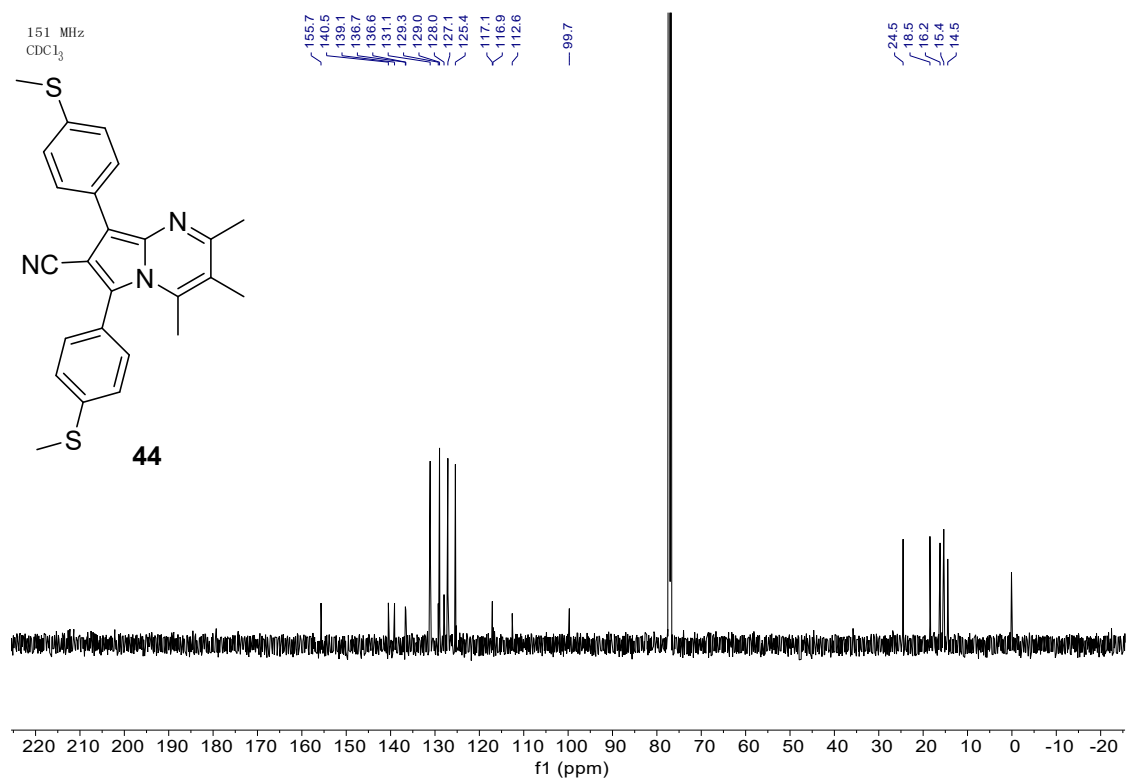

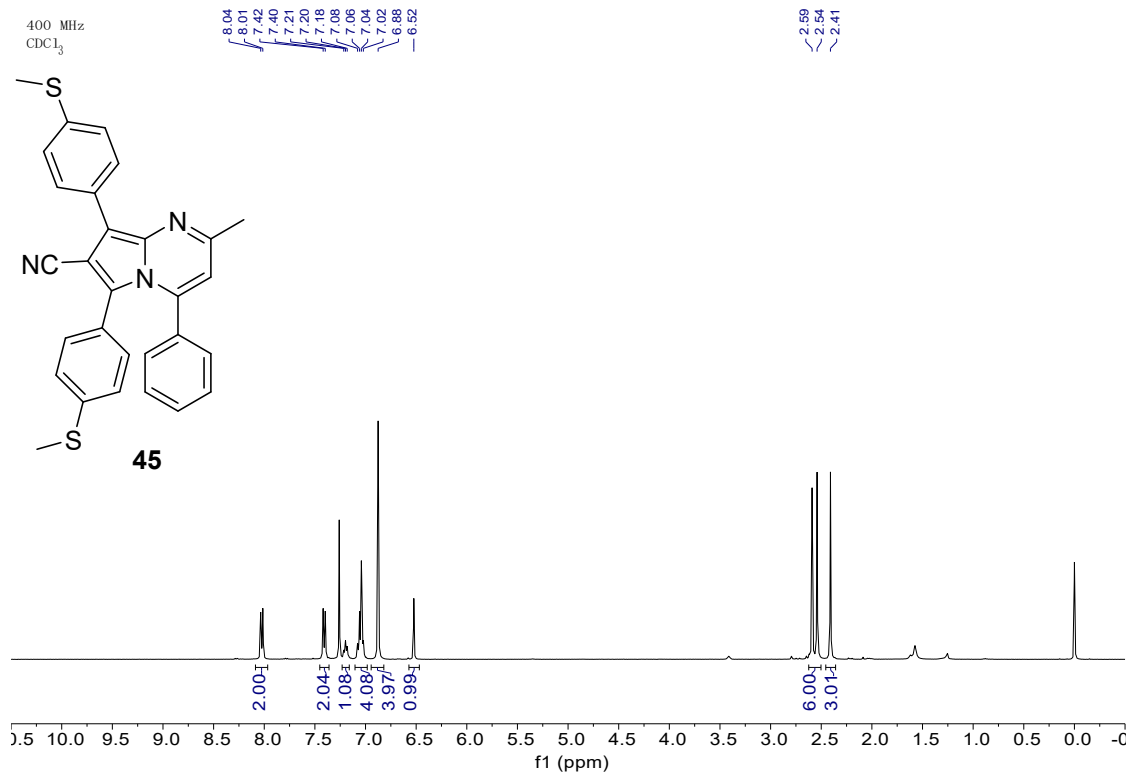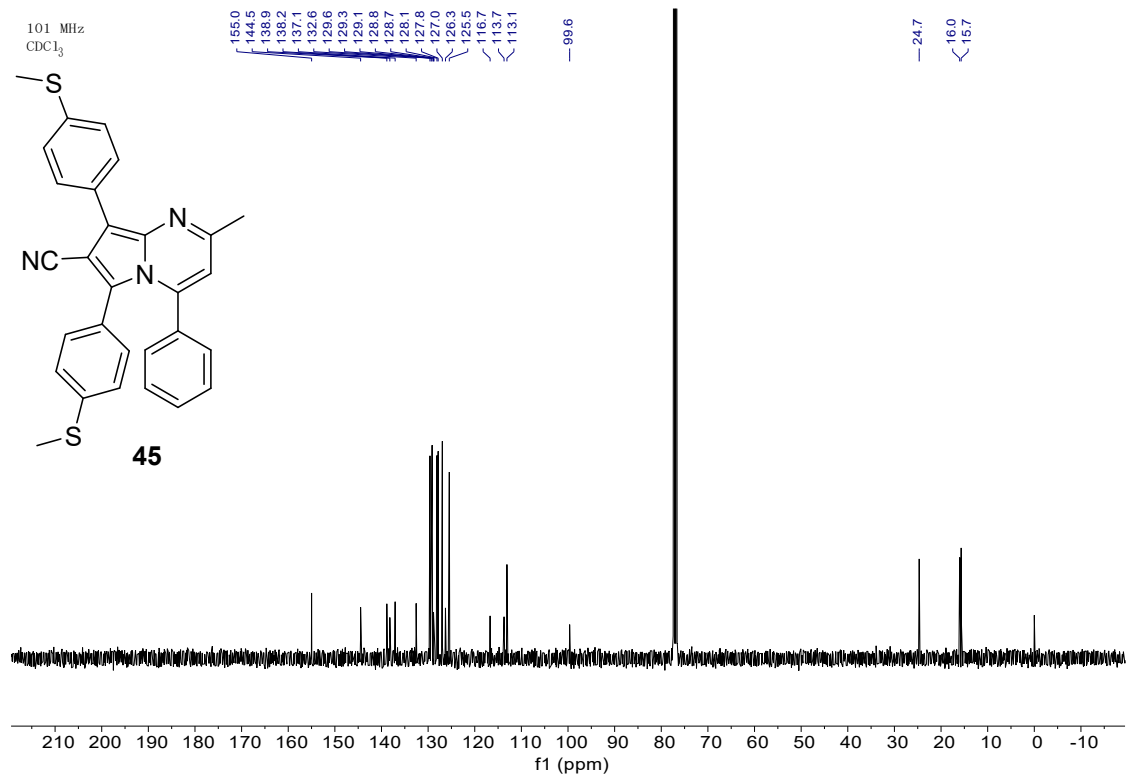

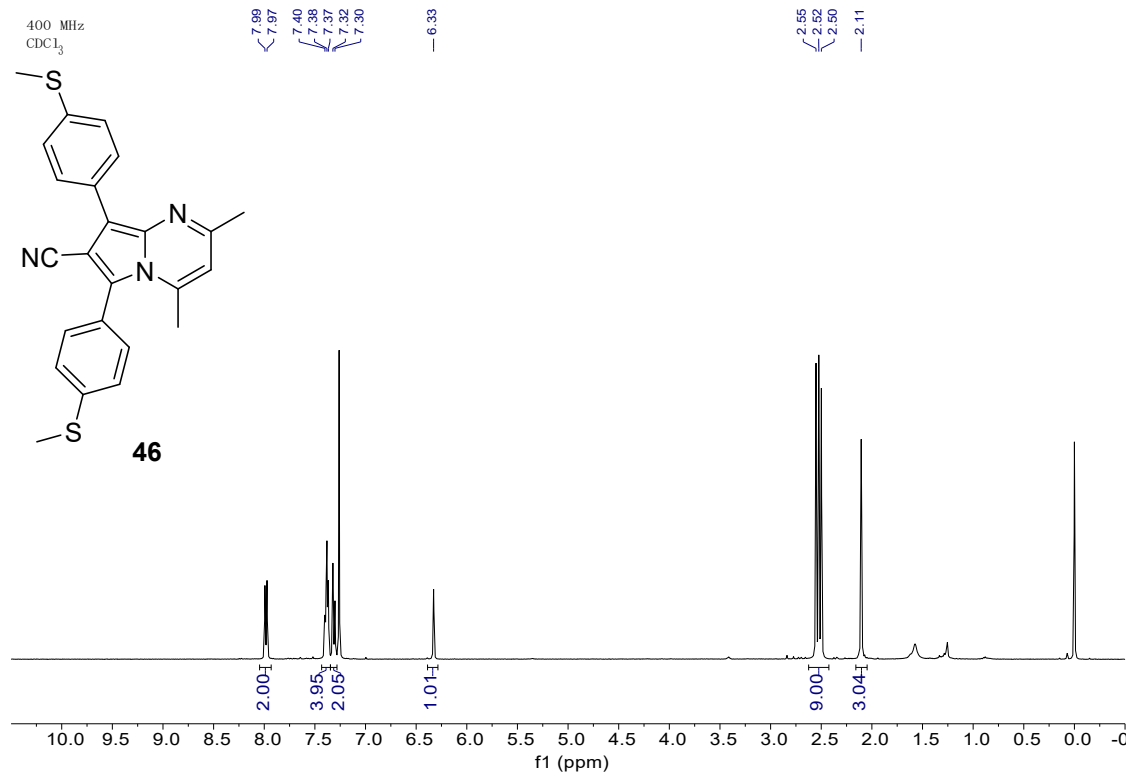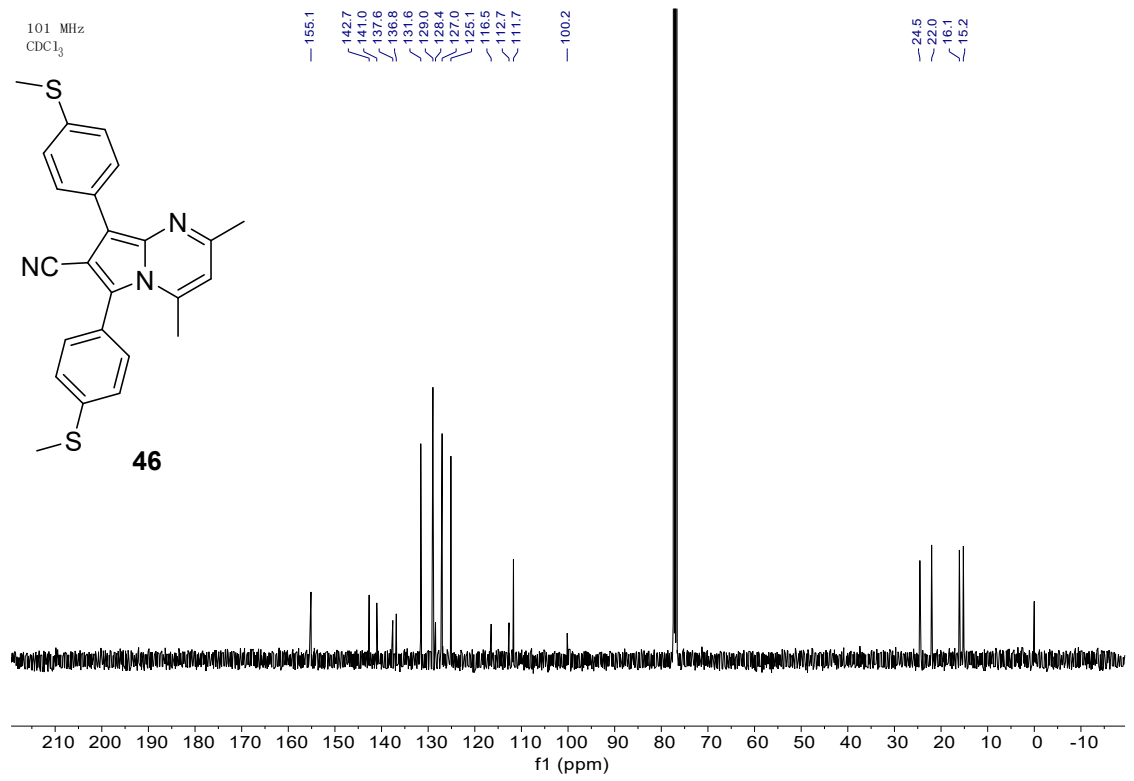

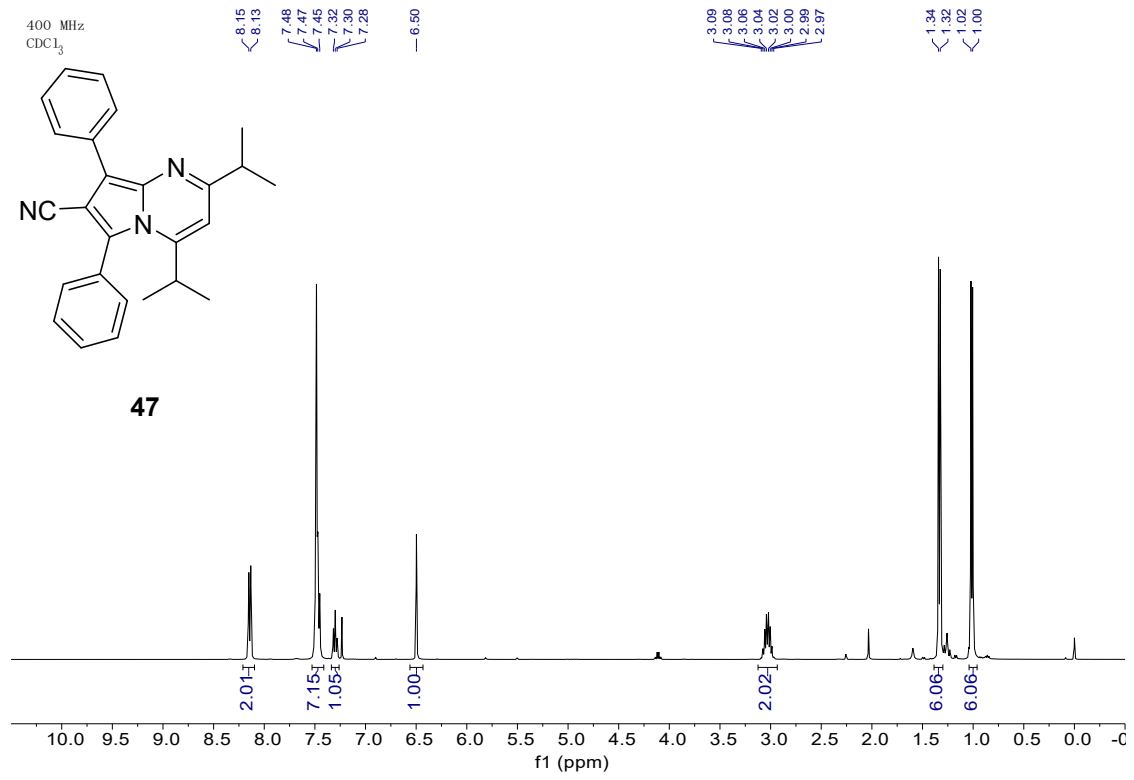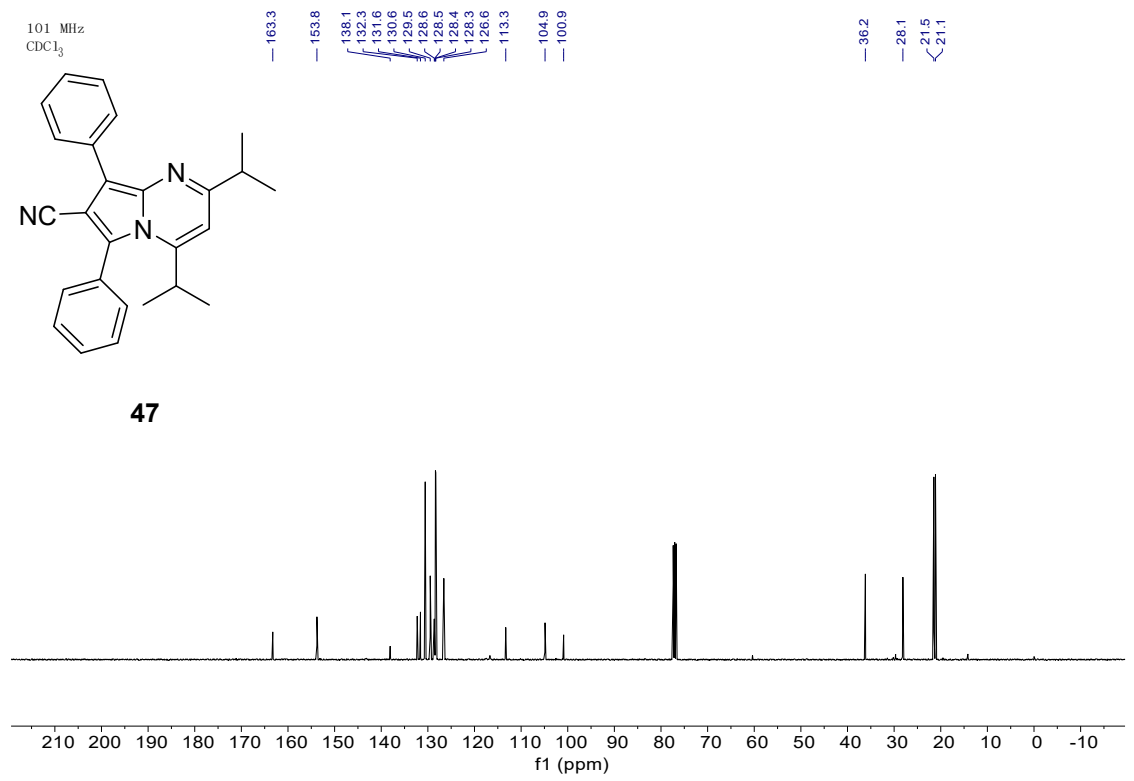



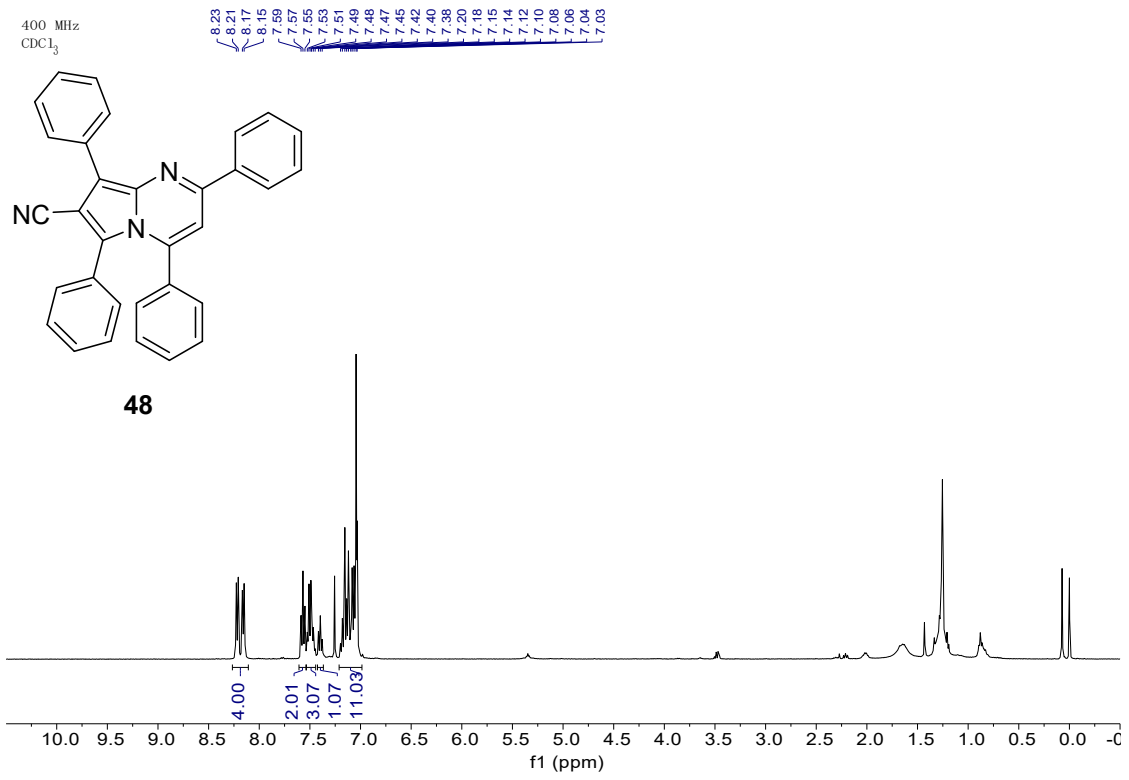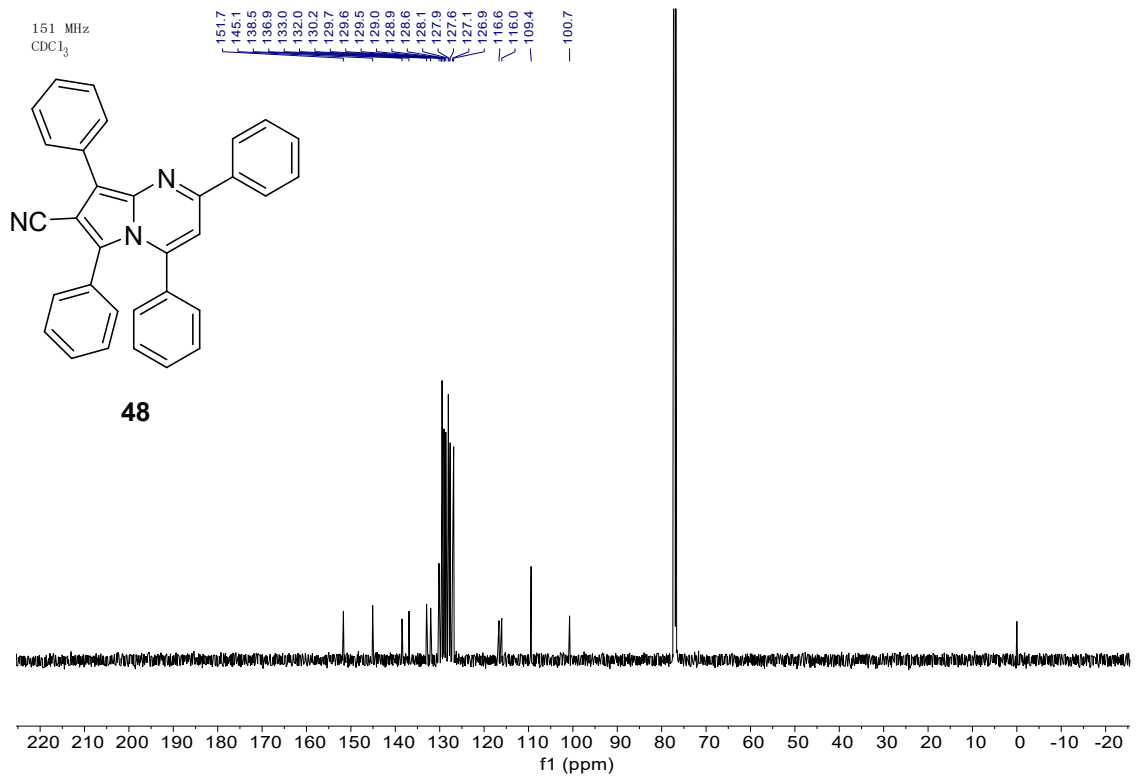

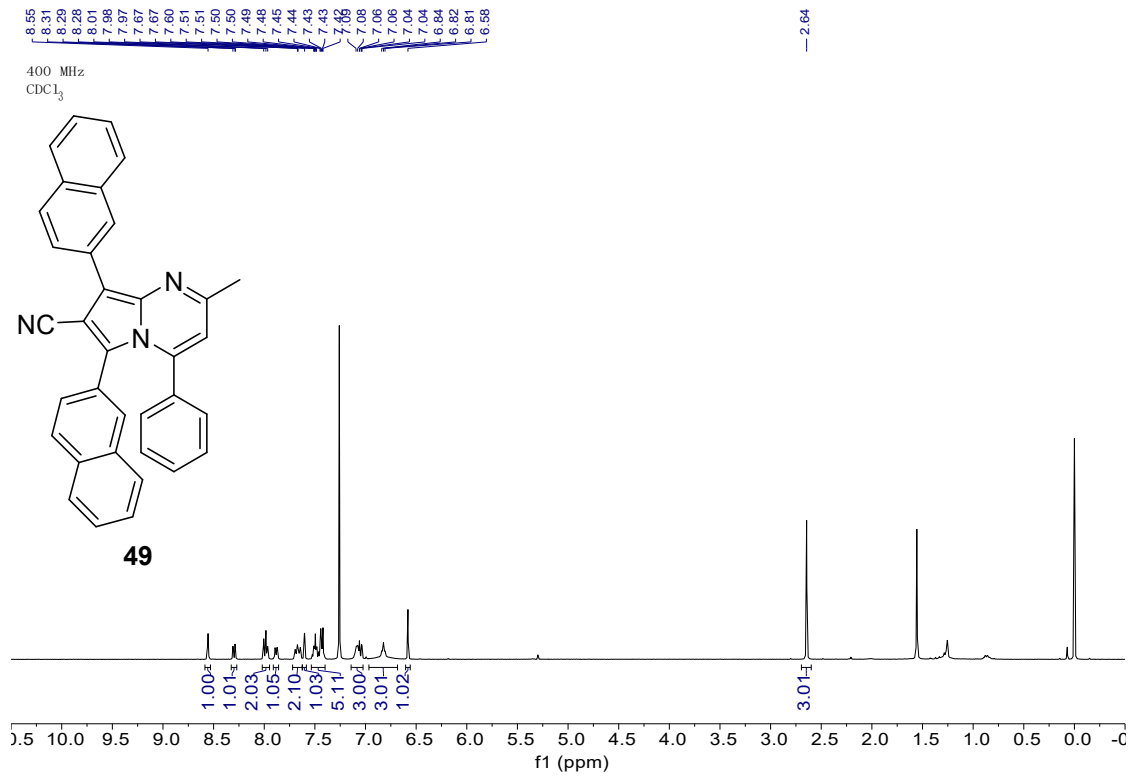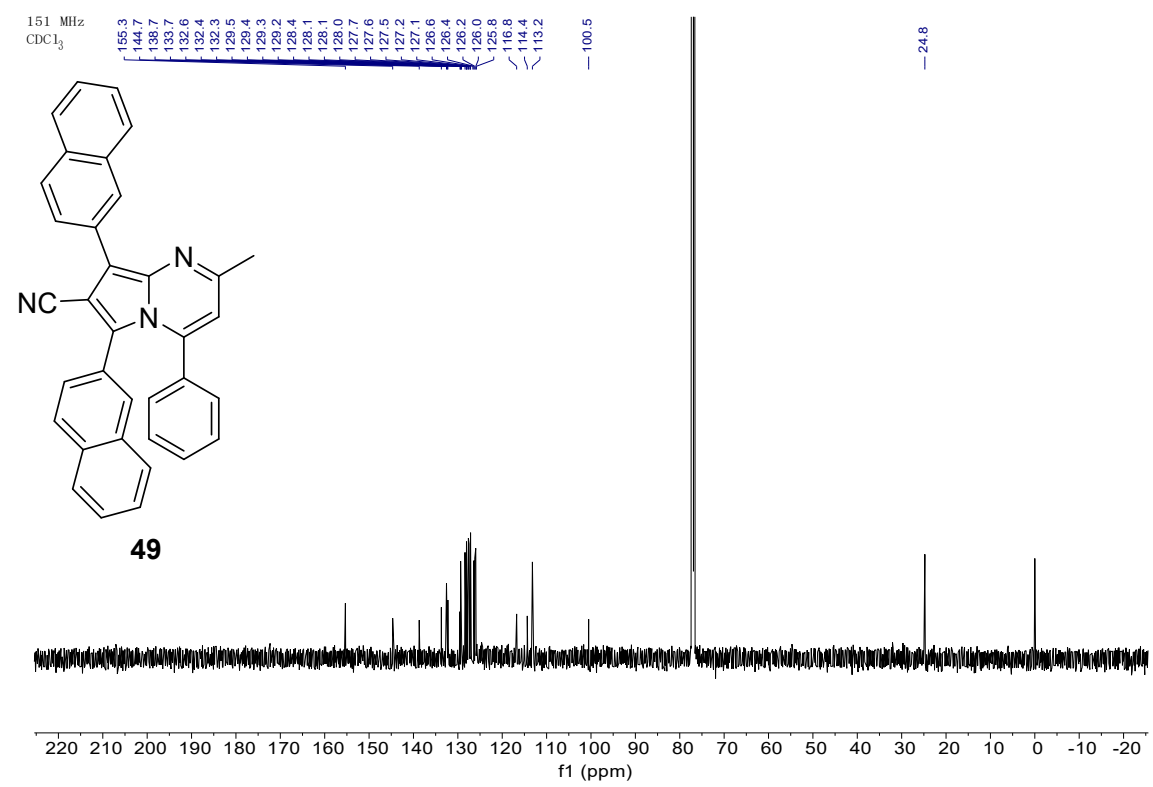

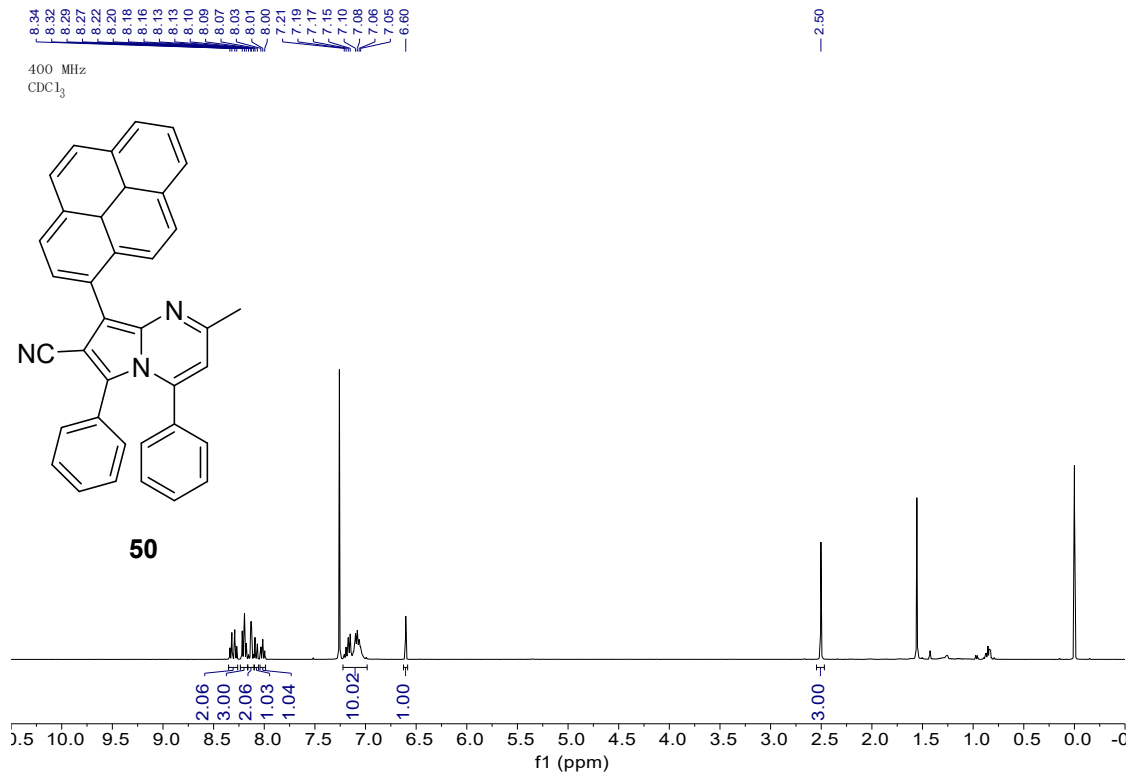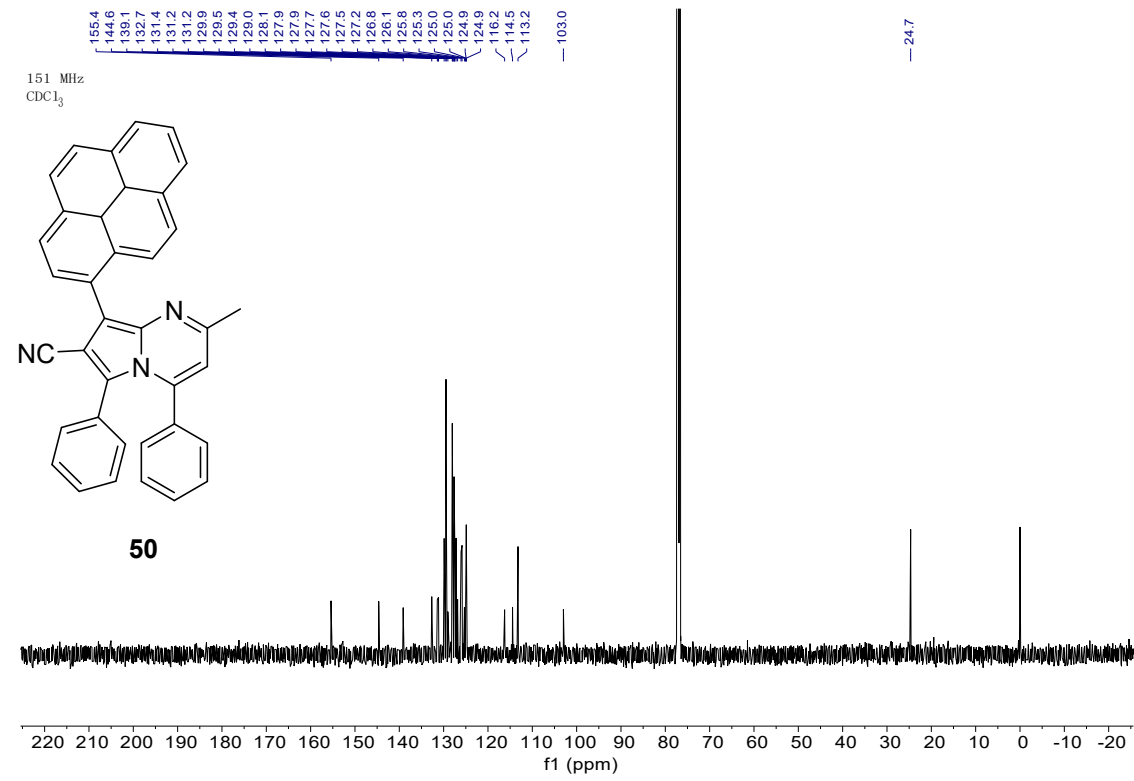

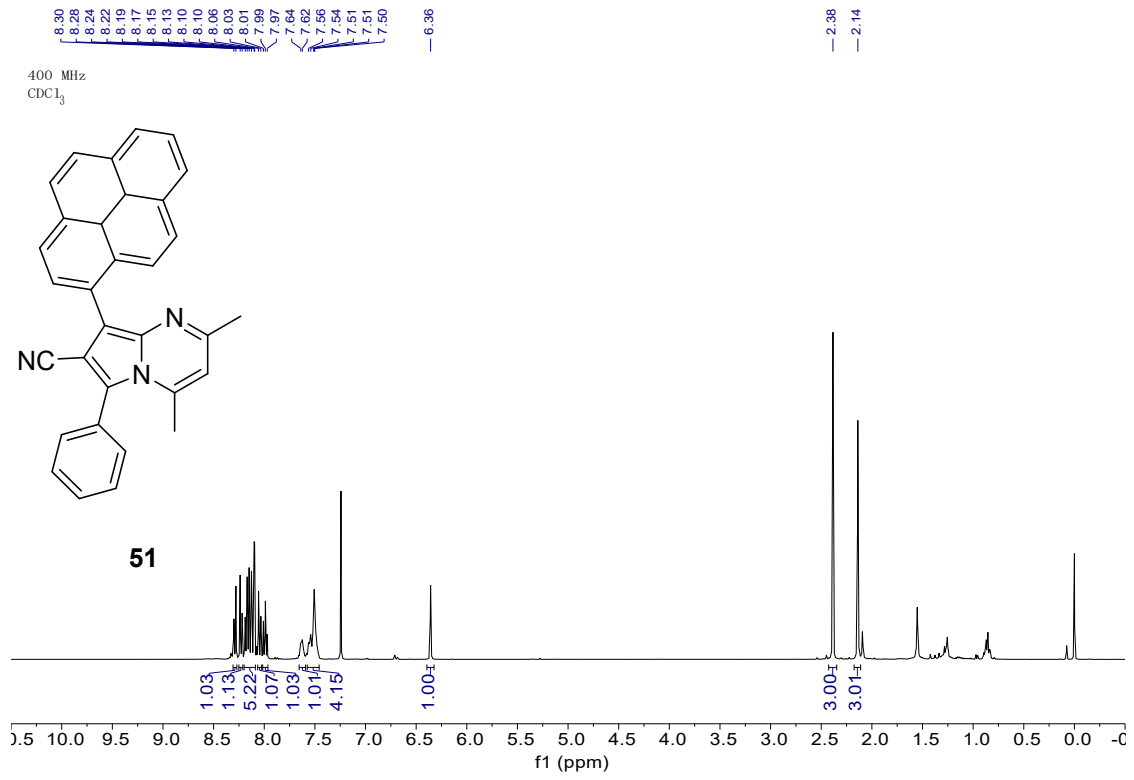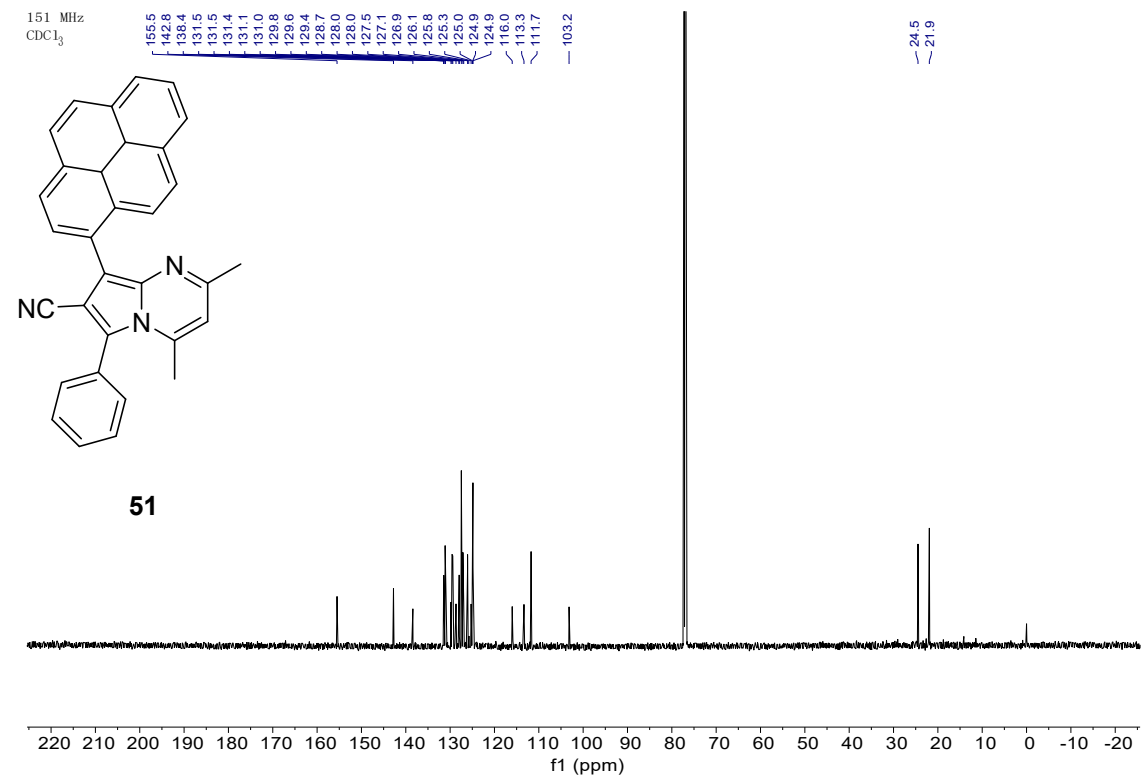

**Table S10.** Electronic potential energies and correction to zero point energies, thermal energies, enthalpies, free energies (in Hartree) and imaginary frequencies ( $\text{cm}^{-1}$ ) of optimized structures calculated at the B3LYP-D3/Def2-TZVP/(SMD-DMSO)//B3LYP-D3/Def2-SVP.

| Entry | Structure                | $E_{\text{el,sol}}$ | $E_{\text{el,gas}}$ | $cZPE_{\text{gas}}$ | $cU_{353,\text{gas}}$ | $cH_{353,\text{gas}}$ | $cG_{353,\text{gas}}$ | Imaginary Frequency |
|-------|--------------------------|---------------------|---------------------|---------------------|-----------------------|-----------------------|-----------------------|---------------------|
| 1     | 1SP                      | -1507.776911        | -1506.336978        | 0.349340            | 0.381476              | 0.382594              | 0.275755              |                     |
| 2     | $^-\text{SO}_2\text{Ph}$ | -780.598768         | -779.886120         | 0.097049            | 0.107498              | 0.108617              | 0.055690              |                     |
| 3     | $\text{HSO}_2\text{Ph}$  | -781.067749         | -780.446585         | 0.109587            | 0.120608              | 0.121727              | 0.067874              |                     |
| 4     | 1A                       | -1507.296365        | -1505.793686        | 0.335618            | 0.367261              | 0.368380              | 0.263638              |                     |
| 5     | TS1                      | -1507.272975        | -1505.762705        | 0.333687            | 0.365736              | 0.366854              | 0.261443              | -142.2036           |
| 6     | 1s                       | -1414.292661        | -1412.963548        | 0.328292            | 0.357209              | 0.358327              | 0.259726              |                     |
| 7     | $\text{CN}^-$            | -92.998758          | -92.763823          | 0.004942            | 0.007740              | 0.008858              | -0.018278             |                     |
| 8     | TS2                      | -1507.273792        | -1505.761701        | 0.333801            | 0.365968              | 0.367086              | 0.260568              | -150.8187           |
| 9     | 1B                       | -1507.313429        | -1505.815812        | 0.336645            | 0.368002              | 0.369121              | 0.265101              |                     |
| 10    | int1                     | -1507.318409        | -1505.830647        | 0.337182            | 0.368354              | 0.369473              | 0.268384              |                     |
| 11    | TS3                      | -1507.291662        | -1505.809139        | 0.334903            | 0.366358              | 0.367476              | 0.264648              | -150.7898           |
| 12    | int2                     | -726.699669         | -725.890984         | 0.236214            | 0.256473              | 0.257591              | 0.180188              |                     |
| 13    | TS4                      | -726.674824         | -725.859719         | 0.235577            | 0.254592              | 0.255711              | 0.181836              | -262.7868           |
| 14    | int3                     | -726.676378         | -725.860103         | 0.236602            | 0.255983              | 0.257101              | 0.182787              |                     |
| 15    | int4                     | -726.713605         | -725.912891         | 0.238500            | 0.257419              | 0.258537              | 0.184454              |                     |
| 16    | TS5                      | -819.687054         | -818.703896         | 0.243939            | 0.266082              | 0.267201              | 0.186195              | -267.8221           |
| 17    | int5                     | -819.718467         | -818.739459         | 0.245517            | 0.267198              | 0.268316              | 0.189580              |                     |
| 18    | int6                     | -819.740845         | -818.767902         | 0.246601            | 0.268437              | 0.269555              | 0.190322              |                     |
| 19    | TS6                      | -1507.249116        | -1505.740724        | 0.333239            | 0.365385              | 0.366504              | 0.260750              | -249.2426           |
| 20    | TS7                      | -1507.225244        | -1505.740898        | 0.332107            | 0.364322              | 0.365440              | 0.260091              | -368.9274           |
| 21    | int7                     | -726.662278         | -725.856063         | 0.235634            | 0.255819              | 0.256938              | 0.179559              |                     |
| 22    | TS8                      | -1600.249204        | -1598.481388        | 0.341756            | 0.376026              | 0.377145              | 0.268894              | -427.7573           |
| 23    | int8                     | -1600.260897        | -1598.501294        | 0.342479            | 0.376760              | 0.377878              | 0.269953              |                     |
| 24    | TS9                      | -1600.261741        | -1598.499069        | 0.341494            | 0.376125              | 0.377244              | 0.268037              | -373.0715           |
| 25    | int9                     | -1600.273395        | -1598.519667        | 0.342741            | 0.377344              | 0.378462              | 0.269511              |                     |
| 26    | int10                    | -1507.792024        | -1506.355489        | 0.350625            | 0.382379              | 0.383497              | 0.278152              |                     |
| 27    | TS10                     | -1600.762520        | -1599.152000        | 0.355553            | 0.390633              | 0.391751              | 0.279803              | -263.5716           |
| 28    | int11                    | -1600.777390        | -1599.177853        | 0.356708            | 0.391631              | 0.392749              | 0.281833              |                     |
| 29    | TS11                     | -1600.764930        | -1599.176030        | 0.356105            | 0.390381              | 0.391499              | 0.283004              | -200.3615           |
| 30    | int12                    | -820.199765         | -819.278550         | 0.258126            | 0.281287              | 0.282406              | 0.198378              |                     |

|           |              |             |             |          |          |          |          |           |
|-----------|--------------|-------------|-------------|----------|----------|----------|----------|-----------|
| <b>31</b> | <b>TS12</b>  | -819.677132 | -818.694317 | 0.242448 | 0.265769 | 0.266888 | 0.182888 | -170.3237 |
| <b>32</b> | <b>int13</b> | -819.709713 | -818.730196 | 0.244027 | 0.267008 | 0.268126 | 0.184537 |           |

# Coordinate of optimized structures

|   |           |           |           |
|---|-----------|-----------|-----------|
| 6 | -4.788453 | -2.846645 | 0.951197  |
| 1 | -5.120434 | -1.287473 | 2.416410  |
| 1 | -4.301129 | -4.200897 | -0.667840 |
| 1 | -5.423467 | -3.571528 | 1.466575  |
| 7 | -1.264751 | 0.024208  | 2.728559  |
| 6 | -0.667616 | 0.253373  | 1.763045  |
| 1 | -0.319711 | -1.159460 | -0.708698 |

## Structure S1. 1SP

E(RB3LYP)sol = -1507.77691124 E(RB3LYP)gas = -  
1506.33697826

|    |           |           |           |
|----|-----------|-----------|-----------|
| 6  | 6.244056  | -2.192153 | 0.102681  |
| 6  | 5.547994  | -2.253438 | -1.107203 |
| 6  | 4.241099  | -1.767834 | -1.187297 |
| 6  | 3.601660  | -1.207782 | -0.064425 |
| 6  | 4.317093  | -1.157255 | 1.149450  |
| 6  | 5.620931  | -1.642402 | 1.230391  |
| 1  | 7.266452  | -2.572097 | 0.170282  |
| 1  | 6.023539  | -2.681178 | -1.993393 |
| 1  | 3.703020  | -1.818004 | -2.138209 |
| 1  | 3.849438  | -0.739528 | 2.043564  |
| 1  | 6.157147  | -1.594300 | 2.181575  |
| 6  | 2.226675  | -0.705893 | -0.212679 |
| 1  | 1.785161  | -0.864380 | -1.201890 |
| 6  | 1.501003  | -0.064063 | 0.716184  |
| 1  | 1.915819  | 0.168767  | 1.699815  |
| 6  | 0.094516  | 0.503890  | 0.507257  |
| 7  | -0.535604 | -0.167933 | -0.627058 |
| 6  | 0.256603  | 2.020540  | 0.257793  |
| 6  | 0.580450  | 2.463818  | -1.031040 |
| 6  | 0.168005  | 2.942449  | 1.304496  |
| 6  | 0.808428  | 3.818471  | -1.267746 |
| 1  | 0.629345  | 1.744700  | -1.850079 |
| 6  | 0.402209  | 4.300866  | 1.064925  |
| 1  | -0.098998 | 2.609456  | 2.309814  |
| 6  | 0.722677  | 4.742721  | -0.219810 |
| 1  | 1.047892  | 4.156469  | -2.279011 |
| 1  | 0.323713  | 5.014616  | 1.888714  |
| 1  | 0.899044  | 5.804665  | -0.408065 |
| 16 | -2.107975 | 0.165313  | -1.189323 |
| 8  | -2.438588 | 1.510994  | -0.727642 |
| 8  | -2.079078 | -0.207991 | -2.601112 |
| 6  | -3.172263 | -1.010608 | -0.349820 |
| 6  | -3.809240 | -0.632581 | 0.834922  |
| 6  | -3.343410 | -2.282236 | -0.909195 |
| 6  | -4.620373 | -1.565354 | 1.485949  |
| 1  | -3.666866 | 0.371661  | 1.233932  |
| 6  | -4.154640 | -3.204043 | -0.245146 |
| 1  | -2.862958 | -2.527484 | -1.858366 |

## Structure S2. $\text{SO}_2\text{Ph}$

E(RB3LYP)sol = -780.598768184 E(RB3LYP)gas = -  
779.886120382

|    |           |           |           |
|----|-----------|-----------|-----------|
| 16 | 1.798807  | 0.000100  | -0.351794 |
| 8  | 2.169379  | -1.290273 | 0.373218  |
| 8  | 2.169362  | 1.290119  | 0.373867  |
| 6  | -0.094995 | 0.000037  | -0.123514 |
| 6  | -0.790514 | -1.209278 | -0.062769 |
| 6  | -0.790606 | 1.209305  | -0.063003 |
| 6  | -2.186954 | -1.212665 | 0.037346  |
| 1  | -0.201786 | -2.132927 | -0.066436 |
| 6  | -2.187058 | 1.212608  | 0.037093  |
| 1  | -0.201946 | 2.132996  | -0.066973 |
| 6  | -2.889155 | -0.000050 | 0.081475  |
| 1  | -2.734884 | -2.160680 | 0.092803  |
| 1  | -2.735048 | 2.160597  | 0.092389  |
| 1  | -3.981483 | -0.000099 | 0.160478  |

## Structure S3. $\text{HSO}_2\text{Ph}$

E(RB3LYP)sol = -781.067749243 E(RB3LYP)gas = -  
780.446585051

|    |           |           |           |
|----|-----------|-----------|-----------|
| 16 | -1.697194 | -0.021501 | -0.418301 |
| 8  | -2.173223 | 1.322113  | 0.009362  |
| 8  | -1.945874 | -1.169311 | 0.814770  |
| 6  | 0.102378  | -0.025343 | -0.158663 |
| 6  | 0.723418  | 1.196984  | 0.095644  |
| 6  | 2.114170  | 1.231743  | 0.238917  |
| 6  | 2.861231  | 0.055542  | 0.119471  |
| 6  | 2.222809  | -1.164039 | -0.139365 |
| 6  | 0.834492  | -1.210293 | -0.282155 |
| 1  | 0.108919  | 2.095586  | 0.188684  |
| 1  | 2.614993  | 2.180804  | 0.445924  |
| 1  | 3.948208  | 0.087033  | 0.229222  |
| 1  | 2.809010  | -2.082419 | -0.224899 |
| 1  | 0.322430  | -2.157695 | -0.465395 |
| 1  | -2.846666 | -1.509269 | 0.683130  |

**Structure S4. 1A**E(RB3LYP)sol = -1507.29636505  
1505.79368563

E(RB3LYP)gas = -

**Structure S5. TS1**E(RB3LYP)sol = -1507.27297462  
1505.76270527

E(RB3LYP)gas = -

|    |           |           |           |
|----|-----------|-----------|-----------|
| 6  | 5.944139  | -2.525682 | -0.058799 |
| 6  | 4.945816  | -3.047630 | -0.886527 |
| 6  | 3.675066  | -2.468188 | -0.906995 |
| 6  | 3.360260  | -1.354110 | -0.101847 |
| 6  | 4.383576  | -0.839209 | 0.723497  |
| 6  | 5.652587  | -1.416042 | 0.745329  |
| 1  | 6.940738  | -2.975464 | -0.040350 |
| 1  | 5.157368  | -3.912463 | -1.522169 |
| 1  | 2.898450  | -2.881101 | -1.556677 |
| 1  | 4.181143  | 0.029995  | 1.353081  |
| 1  | 6.425619  | -0.994690 | 1.394790  |
| 6  | 2.003534  | -0.793029 | -0.164089 |
| 1  | 1.309181  | -1.223341 | -0.892970 |
| 6  | 1.508585  | 0.201179  | 0.585985  |
| 1  | 2.103383  | 0.703901  | 1.354803  |
| 6  | 0.079214  | 0.745202  | 0.425526  |
| 7  | -0.579426 | 0.021334  | -0.619980 |
| 6  | 0.254564  | 2.271761  | 0.164468  |
| 6  | 0.203478  | 2.744305  | -1.152827 |
| 6  | 0.542741  | 3.170850  | 1.199178  |
| 6  | 0.442205  | 4.092173  | -1.427681 |
| 1  | -0.053471 | 2.039988  | -1.945896 |
| 6  | 0.779578  | 4.521748  | 0.924413  |
| 1  | 0.562021  | 2.816237  | 2.233443  |
| 6  | 0.734000  | 4.987928  | -0.392516 |
| 1  | 0.388646  | 4.448791  | -2.460609 |
| 1  | 0.991704  | 5.213167  | 1.745603  |
| 1  | 0.913135  | 6.045100  | -0.610186 |
| 16 | -2.123720 | 0.305072  | -0.908876 |
| 8  | -2.671691 | 1.466042  | -0.157908 |
| 8  | -2.371225 | 0.241684  | -2.366512 |
| 6  | -3.002098 | -1.147137 | -0.250688 |
| 6  | -3.578403 | -1.099718 | 1.021828  |
| 6  | -3.061735 | -2.316149 | -1.017821 |
| 6  | -4.205418 | -2.240193 | 1.534854  |
| 1  | -3.521367 | -0.172270 | 1.593136  |
| 6  | -3.689469 | -3.450825 | -0.499377 |
| 1  | -2.622785 | -2.308661 | -2.017640 |
| 6  | -4.261481 | -3.416331 | 0.779385  |
| 1  | -4.652343 | -2.208441 | 2.532967  |
| 1  | -3.739083 | -4.366807 | -1.096392 |
| 1  | -4.753021 | -4.306103 | 1.184318  |
| 7  | -1.014876 | 0.335732  | 2.816469  |
| 6  | -0.551800 | 0.547385  | 1.773490  |

|    |           |           |           |
|----|-----------|-----------|-----------|
| 6  | 6.243188  | -1.935581 | -0.251178 |
| 6  | 5.319942  | -2.544195 | -1.106968 |
| 6  | 3.992495  | -2.111907 | -1.131000 |
| 6  | 3.545719  | -1.056998 | -0.307023 |
| 6  | 4.491157  | -0.463003 | 0.558620  |
| 6  | 5.816639  | -0.893570 | 0.582760  |
| 1  | 7.283072  | -2.273015 | -0.227072 |
| 1  | 5.635031  | -3.363619 | -1.759730 |
| 1  | 3.275789  | -2.594033 | -1.801879 |
| 1  | 4.174843  | 0.335919  | 1.232429  |
| 1  | 6.525387  | -0.417166 | 1.266478  |
| 6  | 2.144422  | -0.634763 | -0.380923 |
| 1  | 1.467436  | -1.270303 | -0.960203 |
| 6  | 1.607055  | 0.458200  | 0.193316  |
| 1  | 2.215132  | 1.164438  | 0.760811  |
| 6  | 0.172721  | 0.831361  | 0.064346  |
| 7  | -0.599215 | -0.045110 | -0.532280 |
| 6  | -0.075374 | 2.325137  | 0.054996  |
| 6  | -0.540521 | 2.899446  | -1.140785 |
| 6  | 0.271313  | 3.171451  | 1.118525  |
| 6  | -0.659112 | 4.285781  | -1.265632 |
| 1  | -0.823684 | 2.252804  | -1.973630 |
| 6  | 0.155399  | 4.556443  | 0.990617  |
| 1  | 0.588625  | 2.713254  | 2.056562  |
| 6  | -0.309501 | 5.121772  | -0.202170 |
| 1  | -1.033341 | 4.711418  | -2.201049 |
| 1  | 0.415598  | 5.199312  | 1.836694  |
| 1  | -0.408410 | 6.207256  | -0.297214 |
| 16 | -2.226060 | 0.165986  | -0.749559 |
| 8  | -2.832298 | 1.173567  | 0.136313  |
| 8  | -2.498369 | 0.249824  | -2.200691 |
| 6  | -2.813707 | -1.444553 | -0.189942 |
| 6  | -2.684749 | -1.782720 | 1.162101  |
| 6  | -3.419765 | -2.301992 | -1.108982 |
| 6  | -3.173498 | -3.020634 | 1.586635  |
| 1  | -2.188624 | -1.107896 | 1.866430  |
| 6  | -3.912096 | -3.534528 | -0.666365 |
| 1  | -3.493624 | -1.989999 | -2.152464 |
| 6  | -3.788553 | -3.893572 | 0.679786  |
| 1  | -3.065755 | -3.302605 | 2.637410  |
| 1  | -4.390838 | -4.215777 | -1.375942 |
| 1  | -4.170118 | -4.859507 | 1.024096  |
| 7  | -0.509367 | -0.217916 | 3.241812  |



|   |           |          |          |
|---|-----------|----------|----------|
| 6 | -0.047200 | 0.403057 | 2.360849 |
|---|-----------|----------|----------|

---

|                |           |
|----------------|-----------|
| Frequencies -- | -142.2036 |
| Red. masses -- | 10.2542   |
| Frc consts --  | 0.1222    |
| IR Inten --    | 95.3380   |

**Structure S6. 1s**

|                |                |                |   |
|----------------|----------------|----------------|---|
| E(RB3LYP)sol = | -1414.29266090 | E(RB3LYP)gas = | - |
| 1412.96354785  |                |                |   |

---

|    |           |           |           |
|----|-----------|-----------|-----------|
| 6  | -6.342143 | -1.291591 | 0.001858  |
| 6  | -5.380158 | -2.305271 | 0.029936  |
| 6  | -4.024050 | -1.978776 | 0.073872  |
| 6  | -3.597880 | -0.634245 | 0.089907  |
| 6  | -4.584337 | 0.376101  | 0.062925  |
| 6  | -5.937442 | 0.050187  | 0.019008  |
| 1  | -7.405179 | -1.543002 | -0.031872 |
| 1  | -5.687393 | -3.353941 | 0.018128  |
| 1  | -3.273704 | -2.773744 | 0.096178  |
| 1  | -4.289017 | 1.427186  | 0.079781  |
| 1  | -6.686100 | 0.846172  | -0.000352 |
| 6  | -2.163780 | -0.355051 | 0.133180  |
| 1  | -1.503645 | -1.227805 | 0.182953  |
| 6  | -1.560909 | 0.855854  | 0.118267  |
| 1  | -2.148979 | 1.774282  | 0.066878  |
| 6  | -0.097313 | 1.027150  | 0.180921  |
| 7  | 0.616166  | -0.030909 | 0.411225  |
| 6  | 0.409005  | 2.419422  | -0.003462 |
| 6  | -0.113228 | 3.221097  | -1.034628 |
| 6  | 1.377097  | 2.960552  | 0.861232  |
| 6  | 0.342830  | 4.527259  | -1.215961 |
| 1  | -0.860346 | 2.808573  | -1.717037 |
| 6  | 1.811836  | 4.275116  | 0.691016  |
| 1  | 1.789848  | 2.350753  | 1.665881  |
| 6  | 1.302818  | 5.059089  | -0.348865 |
| 1  | -0.052995 | 5.132191  | -2.035491 |
| 1  | 2.559595  | 4.686809  | 1.373059  |
| 1  | 1.653784  | 6.085382  | -0.483984 |
| 16 | 2.305774  | -0.066407 | 0.363416  |
| 8  | 2.845037  | 0.713081  | -0.758536 |
| 8  | 2.801891  | 0.154444  | 1.730325  |
| 6  | 2.521999  | -1.804982 | -0.023362 |
| 6  | 2.725978  | -2.182618 | -1.351800 |
| 6  | 2.498026  | -2.738962 | 1.015447  |
| 6  | 2.895603  | -3.538298 | -1.646749 |
| 1  | 2.759336  | -1.417256 | -2.129225 |
| 6  | 2.667943  | -4.090290 | 0.707169  |
| 1  | 2.358640  | -2.398764 | 2.043088  |

|   |          |           |           |
|---|----------|-----------|-----------|
| 6 | 2.863678 | -4.488933 | -0.620813 |
| 1 | 3.058696 | -3.852154 | -2.680717 |
| 1 | 2.654165 | -4.835139 | 1.506701  |
| 1 | 2.998882 | -5.547728 | -0.856105 |

**Structure S7. CN<sup>-</sup>**

|                |                |                |   |
|----------------|----------------|----------------|---|
| E(RB3LYP)sol = | -92.9987583882 | E(RB3LYP)gas = | - |
| 92.7638229989  |                |                |   |

---

|   |          |          |           |
|---|----------|----------|-----------|
| 7 | 0.000000 | 0.000000 | 0.544137  |
| 6 | 0.000000 | 0.000000 | -0.634826 |

**Structure S8. TS2**

|                |                |                |   |
|----------------|----------------|----------------|---|
| E(RB3LYP)sol = | -1507.27379179 | E(RB3LYP)gas = | - |
| 1505.76170084  |                |                |   |

---

|    |           |           |           |
|----|-----------|-----------|-----------|
| 6  | 6.293527  | -0.674351 | -0.648563 |
| 6  | 5.429377  | -1.776930 | -0.675768 |
| 6  | 4.057653  | -1.597366 | -0.511622 |
| 6  | 3.506530  | -0.314128 | -0.323344 |
| 6  | 4.386370  | 0.782970  | -0.302840 |
| 6  | 5.764037  | 0.605055  | -0.459028 |
| 1  | 7.371378  | -0.813520 | -0.772342 |
| 1  | 5.831594  | -2.784426 | -0.815429 |
| 1  | 3.385839  | -2.458384 | -0.490192 |
| 1  | 3.991151  | 1.792132  | -0.174168 |
| 1  | 6.427125  | 1.474931  | -0.437792 |
| 6  | 2.040794  | -0.169425 | -0.211340 |
| 1  | 1.450427  | -1.000824 | -0.594415 |
| 6  | 1.381622  | 1.037786  | -0.079219 |
| 1  | 1.926937  | 1.937643  | 0.207453  |
| 6  | -0.039732 | 1.154940  | -0.215488 |
| 7  | -0.731616 | 0.107529  | -0.611622 |
| 6  | -0.636960 | 2.500815  | 0.064956  |
| 6  | -0.228845 | 3.243154  | 1.185750  |
| 6  | -1.589691 | 3.056970  | -0.806882 |
| 6  | -0.762648 | 4.510100  | 1.433201  |
| 1  | 0.490711  | 2.806476  | 1.881876  |
| 6  | -2.108093 | 4.329770  | -0.567612 |
| 1  | -1.933632 | 2.477793  | -1.665857 |
| 6  | -1.698808 | 5.060968  | 0.552774  |
| 1  | -0.449386 | 5.066830  | 2.320940  |
| 1  | -2.846233 | 4.749444  | -1.256637 |
| 1  | -2.114565 | 6.054685  | 0.743194  |
| 16 | -2.374863 | -0.039985 | -0.514106 |
| 8  | -2.956755 | 0.659381  | 0.646880  |
| 8  | -2.991586 | 0.192288  | -1.839275 |

|   |           |           |           |
|---|-----------|-----------|-----------|
| 6 | -2.474090 | -1.807446 | -0.178906 |
| 6 | -1.680066 | -2.359526 | 0.829065  |
| 6 | -3.384112 | -2.581541 | -0.901264 |
| 6 | -1.790786 | -3.722688 | 1.107650  |
| 1 | -0.943898 | -1.763708 | 1.370952  |
| 6 | -3.500199 | -3.943364 | -0.601526 |
| 1 | -3.972838 | -2.112596 | -1.692090 |
| 6 | -2.703676 | -4.513430 | 0.398884  |
| 1 | -1.131849 | -4.144676 | 1.870563  |
| 1 | -4.207131 | -4.563205 | -1.160953 |
| 1 | -2.787947 | -5.582111 | 0.618183  |
| 7 | 1.172876  | -2.271872 | 2.441585  |
| 6 | 1.739136  | -1.515612 | 1.744763  |

-----  
 Frequencies -- -150.8187  
 Red. masses -- 9.3110  
 Frc consts -- 0.1248  
 IR Inten -- 178.9041

|    |           |           |           |
|----|-----------|-----------|-----------|
| 1  | -4.776375 | 2.702802  | -1.338059 |
| 1  | -5.583921 | 3.129805  | 0.988817  |
| 16 | -1.380280 | -1.241260 | -1.413242 |
| 8  | -2.759138 | -1.298505 | -0.869706 |
| 8  | -1.180163 | -1.570921 | -2.836380 |
| 6  | -0.449576 | -2.485818 | -0.468448 |
| 6  | -0.716000 | -2.649197 | 0.895554  |
| 6  | 0.621372  | -3.152356 | -1.072271 |
| 6  | 0.115017  | -3.468654 | 1.664756  |
| 1  | -1.566802 | -2.124248 | 1.334063  |
| 6  | 1.440601  | -3.979461 | -0.299190 |
| 1  | 0.793343  | -3.000543 | -2.140062 |
| 6  | 1.195040  | -4.131942 | 1.071239  |
| 1  | -0.072751 | -3.580961 | 2.736022  |
| 1  | 2.281161  | -4.502547 | -0.765164 |
| 1  | 1.849442  | -4.763010 | 1.678826  |
| 7  | 2.498200  | -0.584224 | 3.093842  |
| 6  | 2.103028  | -0.196786 | 2.074162  |

**Structure S9. 1B**

E(RB3LYP)sol = -1507.31342909 E(RB3LYP)gas = -  
 1505.81581222

-----  

|   |           |           |           |
|---|-----------|-----------|-----------|
| 6 | 4.336327  | 2.948034  | -1.314163 |
| 6 | 4.594703  | 2.622887  | 0.019080  |
| 6 | 3.731479  | 1.767925  | 0.716445  |
| 6 | 2.600187  | 1.233884  | 0.087704  |
| 6 | 2.340728  | 1.565262  | -1.255150 |
| 6 | 3.205681  | 2.413786  | -1.946933 |
| 1 | 5.011335  | 3.613854  | -1.859992 |
| 1 | 5.474173  | 3.033138  | 0.524473  |
| 1 | 3.943662  | 1.510810  | 1.757387  |
| 1 | 1.447501  | 1.144969  | -1.728897 |
| 1 | 2.995248  | 2.661419  | -2.991481 |
| 6 | 1.594502  | 0.319675  | 0.795596  |
| 1 | 1.423888  | -0.550474 | 0.139594  |
| 6 | 0.240260  | 0.977036  | 0.994817  |
| 1 | 0.146643  | 1.681074  | 1.824044  |
| 6 | -0.787014 | 0.769499  | 0.119580  |
| 7 | -0.563411 | 0.099682  | -1.072422 |
| 6 | -2.121933 | 1.395209  | 0.383412  |
| 6 | -2.595959 | 1.626476  | 1.686753  |
| 6 | -2.933909 | 1.783338  | -0.697130 |
| 6 | -3.828039 | 2.248694  | 1.904559  |
| 1 | -2.000934 | 1.286806  | 2.537733  |
| 6 | -4.162127 | 2.407913  | -0.481988 |
| 1 | -2.578835 | 1.574429  | -1.707288 |
| 6 | -4.616096 | 2.648017  | 0.820403  |
| 1 | -4.181043 | 2.409511  | 2.927868  |

**Structure S10. int1**

E(RB3LYP)sol = -1507.31840878 E(RB3LYP)gas = -  
 1505.83064681

-----  

|   |           |           |           |
|---|-----------|-----------|-----------|
| 6 | -4.690755 | 2.453421  | -0.406738 |
| 6 | -4.686205 | 1.624533  | 0.724376  |
| 6 | -3.499411 | 1.085644  | 1.213802  |
| 6 | -2.248808 | 1.339368  | 0.589671  |
| 6 | -2.278993 | 2.171229  | -0.560761 |
| 6 | -3.469039 | 2.720099  | -1.036883 |
| 1 | -5.623886 | 2.875355  | -0.790022 |
| 1 | -5.626658 | 1.395860  | 1.236576  |
| 1 | -3.524723 | 0.442201  | 2.096707  |
| 1 | -1.357389 | 2.357081  | -1.115253 |
| 1 | -3.443145 | 3.352181  | -1.930793 |
| 6 | -1.013880 | 0.738616  | 1.084803  |
| 1 | 1.033871  | -1.179615 | 1.926364  |
| 6 | 0.269017  | 1.105552  | 0.592039  |
| 1 | 0.302697  | 2.084668  | 0.105010  |
| 6 | 1.476654  | 0.427253  | 0.635196  |
| 7 | 1.525255  | -0.945784 | 1.061484  |
| 6 | 2.756306  | 1.045205  | 0.263307  |
| 6 | 2.893433  | 2.443244  | 0.064659  |
| 6 | 3.928090  | 0.266713  | 0.094935  |
| 6 | 4.107751  | 3.015731  | -0.313125 |
| 1 | 2.039032  | 3.101255  | 0.234485  |
| 6 | 5.142366  | 0.845633  | -0.269585 |
| 1 | 3.863349  | -0.811015 | 0.228822  |
| 6 | 5.249683  | 2.225119  | -0.485552 |

|    |           |           |           |
|----|-----------|-----------|-----------|
| 1  | 4.165425  | 4.099749  | -0.455869 |
| 1  | 6.020199  | 0.203742  | -0.395020 |
| 1  | 6.204014  | 2.675563  | -0.772916 |
| 16 | 1.245808  | -2.189841 | -0.046113 |
| 8  | 2.193471  | -2.020327 | -1.155237 |
| 8  | 1.218393  | -3.422996 | 0.749889  |
| 6  | -0.395687 | -1.940837 | -0.736080 |
| 6  | -0.543999 | -1.118321 | -1.856716 |
| 6  | -1.497721 | -2.501871 | -0.085509 |
| 6  | -1.830767 | -0.833784 | -2.318059 |
| 1  | 0.343898  | -0.705131 | -2.336869 |
| 6  | -2.777927 | -2.211753 | -0.561002 |
| 1  | -1.342728 | -3.118185 | 0.800235  |
| 6  | -2.945123 | -1.373327 | -1.667859 |
| 1  | -1.966839 | -0.168692 | -3.174240 |
| 1  | -3.651052 | -2.620680 | -0.046624 |
| 1  | -3.950700 | -1.118137 | -2.011183 |
| 7  | -1.193244 | -1.051497 | 2.941443  |
| 6  | -1.117869 | -0.244329 | 2.095198  |

|    |           |           |           |
|----|-----------|-----------|-----------|
| 6  | -4.248334 | -2.970150 | 0.153412  |
| 1  | -2.800756 | -4.577242 | 0.256402  |
| 1  | -5.433017 | -1.157111 | 0.156510  |
| 1  | -5.079048 | -3.619133 | -0.138781 |
| 16 | -1.567373 | 2.362229  | 0.073512  |
| 8  | -3.007864 | 2.421677  | -0.328614 |
| 8  | -0.822261 | 3.646403  | 0.250883  |
| 6  | -0.719965 | 1.466516  | -1.289957 |
| 6  | -1.406677 | 0.475191  | -1.990152 |
| 6  | 0.635206  | 1.710873  | -1.520229 |
| 6  | -0.722387 | -0.280652 | -2.949090 |
| 1  | -2.463442 | 0.304263  | -1.775257 |
| 6  | 1.308945  | 0.966174  | -2.490743 |
| 1  | 1.142533  | 2.476155  | -0.928399 |
| 6  | 0.630746  | -0.032658 | -3.202079 |
| 1  | -1.248213 | -1.070306 | -3.493443 |
| 1  | 2.370142  | 1.148079  | -2.678158 |
| 1  | 1.166054  | -0.628237 | -3.947345 |
| 7  | 1.797583  | 1.808737  | 2.956008  |
| 6  | 1.660878  | 0.948388  | 2.178857  |

-----

**Structure S11. TS3**

E(RB3LYP)sol = -1507.29166243      E(RB3LYP)gas = -  
1505.80913899

|   |           |           |           |
|---|-----------|-----------|-----------|
| 6 | 5.310164  | -1.438468 | -0.486500 |
| 6 | 5.297496  | -0.632109 | 0.657861  |
| 6 | 4.092317  | -0.208641 | 1.217224  |
| 6 | 2.847485  | -0.577289 | 0.654870  |
| 6 | 2.881616  | -1.370889 | -0.516551 |
| 6 | 4.089037  | -1.800197 | -1.067084 |
| 1 | 6.255631  | -1.767780 | -0.926130 |
| 1 | 6.239853  | -0.328917 | 1.124127  |
| 1 | 4.105055  | 0.418742  | 2.111440  |
| 1 | 1.950237  | -1.619540 | -1.026424 |
| 1 | 4.074432  | -2.408626 | -1.976586 |
| 6 | 1.574290  | -0.133868 | 1.254541  |
| 1 | -0.546842 | 1.358883  | 2.137797  |
| 6 | 0.359357  | -0.750199 | 0.963860  |
| 1 | 0.450836  | -1.669679 | 0.382368  |
| 6 | -0.978263 | -0.366111 | 1.277996  |
| 7 | -1.343477 | 0.824222  | 1.785580  |
| 6 | -2.089166 | -1.280777 | 0.901707  |
| 6 | -1.912735 | -2.672070 | 0.740952  |
| 6 | -3.387254 | -0.760976 | 0.693748  |
| 6 | -2.972783 | -3.502051 | 0.368187  |
| 1 | -0.936207 | -3.121933 | 0.934607  |
| 6 | -4.443562 | -1.593695 | 0.323539  |
| 1 | -3.545481 | 0.313318  | 0.795600  |

-----

Frequencies -- -150.7898  
Red. masses -- 12.0207  
Frc consts -- 0.1610  
IR Inten -- 221.6585

-----

**Structure S12. int2**

E(RB3LYP)sol = -726.699668746      E(RB3LYP)gas = -  
725.890983808

|   |           |           |           |
|---|-----------|-----------|-----------|
| 6 | 4.848948  | -1.465761 | -0.052371 |
| 6 | 4.671855  | -0.368577 | 0.794759  |
| 6 | 3.472238  | 0.345514  | 0.780300  |
| 6 | 2.420718  | -0.033077 | -0.075554 |
| 6 | 2.617645  | -1.130820 | -0.935976 |
| 6 | 3.817623  | -1.840713 | -0.921026 |
| 1 | 5.790064  | -2.021002 | -0.044890 |
| 1 | 5.473055  | -0.062317 | 1.471664  |
| 1 | 3.347309  | 1.203630  | 1.444374  |
| 1 | 1.836956  | -1.418658 | -1.643078 |
| 1 | 3.953603  | -2.684973 | -1.601395 |
| 6 | 1.133131  | 0.713510  | -0.062410 |
| 1 | -0.660098 | 2.526540  | -1.176729 |
| 6 | -0.052676 | 0.180783  | -0.456057 |
| 1 | -0.054307 | -0.873308 | -0.743366 |
| 6 | -1.370804 | 0.867777  | -0.526810 |
| 7 | -1.543276 | 2.075598  | -0.921659 |
| 6 | -2.569629 | 0.053808  | -0.153484 |
| 6 | -2.459724 | -1.123044 | 0.607289  |

|   |           |           |           |
|---|-----------|-----------|-----------|
| 6 | -3.848722 | 0.488427  | -0.547651 |
| 6 | -3.599052 | -1.851956 | 0.960954  |
| 1 | -1.481658 | -1.467856 | 0.951204  |
| 6 | -4.983123 | -0.242398 | -0.200137 |
| 1 | -3.926019 | 1.409228  | -1.128074 |
| 6 | -4.862611 | -1.416468 | 0.554490  |
| 1 | -3.497417 | -2.760626 | 1.559592  |
| 1 | -5.969935 | 0.103505  | -0.518378 |
| 1 | -5.753562 | -1.988274 | 0.826565  |
| 7 | 1.307305  | 3.148662  | 0.838448  |
| 6 | 1.196482  | 2.067043  | 0.431182  |

Red. masses -- 6.7421  
 Frc consts -- 0.2743  
 IR Inten -- 22.0422

**Structure S14. int3**

E(RB3LYP)sol = -726.676378113 E(RB3LYP)gas = -  
 725.860103341

|   |           |           |           |
|---|-----------|-----------|-----------|
| 6 | 5.144345  | -1.067533 | 0.136335  |
| 6 | 4.876251  | 0.299305  | 0.010683  |
| 6 | 3.561006  | 0.760746  | -0.048332 |
| 6 | 2.482103  | -0.147079 | 0.018464  |
| 6 | 2.767981  | -1.524486 | 0.145296  |
| 6 | 4.083300  | -1.979304 | 0.203485  |
| 1 | 6.176618  | -1.424782 | 0.181917  |
| 1 | 5.700583  | 1.015203  | -0.042384 |
| 1 | 3.323650  | 1.823280  | -0.146609 |
| 1 | 1.955143  | -2.251440 | 0.199787  |
| 1 | 4.284603  | -3.049071 | 0.301938  |
| 6 | 1.097500  | 0.332052  | -0.043307 |
| 1 | -1.400927 | 2.481883  | -0.273827 |
| 6 | -0.043800 | -0.437297 | 0.008884  |
| 1 | -0.108457 | -1.516277 | 0.126079  |
| 6 | -1.203596 | 0.412327  | -0.059294 |
| 7 | -0.813354 | 1.662283  | -0.159587 |
| 6 | -2.605814 | -0.026895 | -0.009215 |
| 6 | -2.958352 | -1.324716 | -0.424667 |
| 6 | -3.617015 | 0.838491  | 0.450750  |
| 6 | -4.289982 | -1.740247 | -0.392857 |
| 1 | -2.188485 | -2.002939 | -0.797595 |
| 6 | -4.945897 | 0.417958  | 0.488263  |
| 1 | -3.357664 | 1.838683  | 0.806170  |
| 6 | -5.286411 | -0.871500 | 0.063954  |
| 1 | -4.552056 | -2.746328 | -0.728818 |
| 1 | -5.719318 | 1.096420  | 0.855945  |
| 1 | -6.328426 | -1.199441 | 0.091851  |
| 7 | 1.318887  | 2.855074  | -0.252110 |
| 6 | 0.717714  | 1.777061  | -0.163871 |

**Structure S13. TS4**

E(RB3LYP)sol = -726.674824006 E(RB3LYP)gas = -  
 725.859719085

|   |           |           |           |
|---|-----------|-----------|-----------|
| 6 | 5.116064  | -1.132467 | 0.141266  |
| 6 | 4.883648  | 0.240336  | 0.015459  |
| 6 | 3.580594  | 0.736135  | -0.044108 |
| 6 | 2.477277  | -0.141066 | 0.021511  |
| 6 | 2.728000  | -1.525334 | 0.148170  |
| 6 | 4.030552  | -2.014967 | 0.207345  |
| 1 | 6.138409  | -1.516904 | 0.187862  |
| 1 | 5.725874  | 0.935051  | -0.037011 |
| 1 | 3.379647  | 1.805167  | -0.143003 |
| 1 | 1.897451  | -2.231813 | 0.201056  |
| 1 | 4.202415  | -3.089859 | 0.305626  |
| 6 | 1.100866  | 0.371981  | -0.041939 |
| 1 | -1.479425 | 2.513752  | -0.275229 |
| 6 | -0.047355 | -0.375153 | 0.017178  |
| 1 | -0.114688 | -1.452735 | 0.141281  |
| 6 | -1.219379 | 0.473503  | -0.055603 |
| 7 | -0.857978 | 1.718998  | -0.157017 |
| 6 | -2.612229 | -0.008599 | -0.007810 |
| 6 | -2.933867 | -1.304172 | -0.452499 |
| 6 | -3.641514 | 0.819939  | 0.477461  |
| 6 | -4.255108 | -1.753192 | -0.426023 |
| 1 | -2.149505 | -1.954295 | -0.844915 |
| 6 | -4.959364 | 0.365557  | 0.511971  |
| 1 | -3.403122 | 1.817746  | 0.853705  |
| 6 | -5.269978 | -0.921140 | 0.057248  |
| 1 | -4.494141 | -2.756713 | -0.786026 |
| 1 | -5.747442 | 1.014988  | 0.900433  |
| 1 | -6.303353 | -1.275676 | 0.082295  |
| 7 | 1.386928  | 2.886916  | -0.268097 |
| 6 | 0.795997  | 1.826954  | -0.171339 |

**Structure S15. int4**

E(RB3LYP)sol = -726.713605392 E(RB3LYP)gas = -  
 725.912891489

|   |          |           |           |
|---|----------|-----------|-----------|
| 6 | 5.177988 | -1.007979 | 0.039550  |
| 6 | 4.863314 | 0.344469  | 0.196322  |
| 6 | 3.534129 | 0.771620  | 0.173258  |
| 6 | 2.484834 | -0.154040 | -0.005469 |
| 6 | 2.820484 | -1.516508 | -0.170479 |

Frequencies -- -262.7868

|   |           |           |           |
|---|-----------|-----------|-----------|
| 6 | 4.147667  | -1.938027 | -0.146708 |
| 1 | 6.219791  | -1.338267 | 0.057465  |
| 1 | 5.660673  | 1.078587  | 0.337983  |
| 1 | 3.288517  | 1.827190  | 0.284631  |
| 1 | 2.033084  | -2.255399 | -0.332572 |
| 1 | 4.382322  | -2.997312 | -0.279208 |
| 6 | 1.078455  | 0.265912  | -0.012994 |
| 1 | 0.596202  | 3.551702  | -0.136796 |
| 6 | -0.034646 | -0.512721 | 0.021323  |
| 1 | -0.072999 | -1.597944 | 0.079702  |
| 6 | -1.209975 | 0.387658  | -0.013856 |
| 7 | -0.871992 | 1.645850  | -0.063587 |
| 6 | -2.612801 | -0.050628 | 0.007097  |
| 6 | -2.960837 | -1.413431 | 0.057771  |
| 6 | -3.640803 | 0.913891  | -0.024701 |
| 6 | -4.301798 | -1.802722 | 0.076285  |
| 1 | -2.184228 | -2.179564 | 0.082625  |
| 6 | -4.976904 | 0.522972  | -0.006061 |
| 1 | -3.358612 | 1.967281  | -0.064060 |
| 6 | -5.311990 | -0.836982 | 0.044525  |
| 1 | -4.558886 | -2.864043 | 0.115635  |
| 1 | -5.765480 | 1.279232  | -0.030980 |
| 1 | -6.361395 | -1.142456 | 0.059091  |
| 7 | 1.235371  | 2.747214  | -0.107136 |
| 6 | 0.539109  | 1.679775  | -0.065605 |

**Structure S16. TS5**

E(RB3LYP)sol = -819.687054118 E(RB3LYP)gas = -  
818.703896246

|   |           |           |           |
|---|-----------|-----------|-----------|
| 6 | 5.188735  | -0.704952 | -0.592374 |
| 6 | 4.863893  | 0.651560  | -0.459305 |
| 6 | 3.544833  | 1.056699  | -0.255919 |
| 6 | 2.492604  | 0.109594  | -0.187421 |
| 6 | 2.841558  | -1.260931 | -0.292078 |
| 6 | 4.164286  | -1.654770 | -0.497276 |
| 1 | 6.225356  | -1.017309 | -0.751495 |
| 1 | 5.654031  | 1.408306  | -0.512463 |
| 1 | 3.297050  | 2.111540  | -0.131277 |
| 1 | 2.069424  | -2.021750 | -0.159024 |
| 1 | 4.399728  | -2.721789 | -0.566777 |
| 6 | 1.104703  | 0.503971  | -0.013903 |
| 1 | 0.529137  | 3.595031  | 0.949809  |
| 6 | -0.008996 | -0.320769 | -0.174377 |
| 1 | -0.044698 | -1.169654 | -0.855577 |
| 6 | -1.197164 | 0.559456  | 0.074217  |
| 7 | -0.858125 | 1.748464  | 0.449366  |
| 6 | -2.609269 | 0.173362  | -0.127610 |

|   |           |           |           |
|---|-----------|-----------|-----------|
| 6 | -2.985137 | -1.154259 | -0.399651 |
| 6 | -3.609531 | 1.163373  | -0.078885 |
| 6 | -4.325318 | -1.478692 | -0.624092 |
| 1 | -2.227600 | -1.939082 | -0.391879 |
| 6 | -4.946841 | 0.836673  | -0.300462 |
| 1 | -3.301733 | 2.188865  | 0.134297  |
| 6 | -5.310869 | -0.487212 | -0.577272 |
| 1 | -4.602195 | -2.517216 | -0.826042 |
| 1 | -5.711917 | 1.617680  | -0.259594 |
| 1 | -6.359763 | -0.745086 | -0.751130 |
| 7 | 1.224846  | 2.876854  | 0.716761  |
| 6 | 0.581848  | 1.799760  | 0.428872  |
| 7 | 0.093411  | -2.774583 | 1.755991  |
| 6 | -0.313958 | -1.750310 | 1.355256  |

-----  
 Frequencies -- -267.8221  
 Red. masses -- 10.5702  
 Frc consts -- 0.4467  
 IR Inten -- 446.1321

**Structure S17. int5**

E(RB3LYP)sol = -819.718466522 E(RB3LYP)gas = -  
818.739458604

|   |           |           |           |
|---|-----------|-----------|-----------|
| 6 | 5.247696  | -0.755995 | -0.430503 |
| 6 | 4.909873  | 0.583256  | -0.173147 |
| 6 | 3.587880  | 0.983387  | -0.008782 |
| 6 | 2.511021  | 0.045997  | -0.100007 |
| 6 | 2.878750  | -1.309553 | -0.359328 |
| 6 | 4.209148  | -1.692683 | -0.518731 |
| 1 | 6.291237  | -1.060729 | -0.553983 |
| 1 | 5.703549  | 1.335657  | -0.097064 |
| 1 | 3.330268  | 2.025170  | 0.189146  |
| 1 | 2.103754  | -2.077799 | -0.426082 |
| 1 | 4.439772  | -2.746309 | -0.713262 |
| 6 | 1.149235  | 0.455030  | 0.039335  |
| 1 | 0.537444  | 3.650909  | 0.417835  |
| 6 | -0.032850 | -0.474901 | -0.089404 |
| 1 | -0.076801 | -1.008912 | -1.064031 |
| 6 | -1.205895 | 0.512618  | -0.007338 |
| 7 | -0.815841 | 1.724792  | 0.148181  |
| 6 | -2.626991 | 0.139463  | -0.128594 |
| 6 | -3.040622 | -1.186472 | -0.362214 |
| 6 | -3.617521 | 1.140049  | -0.027128 |
| 6 | -4.396003 | -1.500582 | -0.489805 |
| 1 | -2.299765 | -1.984565 | -0.433941 |
| 6 | -4.967717 | 0.824005  | -0.156340 |
| 1 | -3.286484 | 2.164498  | 0.153244  |
| 6 | -5.367141 | -0.499532 | -0.388986 |

|   |           |           |           |
|---|-----------|-----------|-----------|
| 1 | -4.694121 | -2.537882 | -0.666776 |
| 1 | -5.719497 | 1.614737  | -0.074445 |
| 1 | -6.427746 | -0.747309 | -0.488776 |
| 7 | 1.249076  | 2.916125  | 0.363855  |
| 6 | 0.627786  | 1.782243  | 0.205523  |
| 7 | -0.193831 | -2.333972 | 1.771847  |
| 6 | -0.129554 | -1.509012 | 0.957274  |

1505.74072430

|    |           |           |           |
|----|-----------|-----------|-----------|
| 6  | -5.884347 | -2.342855 | -0.553157 |
| 6  | -4.934436 | -2.571047 | -1.559218 |
| 6  | -3.644056 | -2.060311 | -1.446056 |
| 6  | -3.239803 | -1.289960 | -0.322495 |
| 6  | -4.214024 | -1.087080 | 0.692825  |
| 6  | -5.504044 | -1.600616 | 0.573187  |
| 1  | -6.897908 | -2.743900 | -0.641150 |
| 1  | -5.206462 | -3.157022 | -2.443316 |
| 1  | -2.914079 | -2.249249 | -2.239277 |
| 1  | -3.937255 | -0.541854 | 1.597835  |
| 1  | -6.224704 | -1.428863 | 1.379378  |
| 6  | -1.897343 | -0.770725 | -0.237662 |
| 1  | -1.158972 | -1.157924 | -0.944887 |
| 6  | -1.441933 | 0.096891  | 0.755938  |
| 1  | -2.186455 | 0.697318  | 1.280138  |
| 6  | -0.216285 | 0.857810  | 0.380744  |
| 7  | 0.866543  | 0.162194  | 0.287198  |
| 6  | -0.381592 | 2.319750  | 0.130096  |
| 6  | -1.545100 | 2.778893  | -0.518780 |
| 6  | 0.580758  | 3.258831  | 0.544935  |
| 6  | -1.735116 | 4.139945  | -0.757735 |
| 1  | -2.285292 | 2.049287  | -0.854151 |
| 6  | 0.378177  | 4.621094  | 0.312984  |
| 1  | 1.485619  | 2.919786  | 1.049574  |
| 6  | -0.774399 | 5.067794  | -0.339698 |
| 1  | -2.636975 | 4.477677  | -1.275867 |
| 1  | 1.132917  | 5.338792  | 0.646005  |
| 1  | -0.923715 | 6.135468  | -0.524826 |
| 16 | 2.380564  | 0.628711  | -0.200137 |
| 8  | 2.410288  | 1.203987  | -1.556230 |
| 8  | 3.066770  | 1.355801  | 0.886619  |
| 6  | 3.120035  | -1.010992 | -0.264074 |
| 6  | 4.039640  | -1.272905 | -1.281117 |
| 6  | 2.825513  | -1.953912 | 0.729529  |
| 6  | 4.693855  | -2.508668 | -1.303478 |
| 1  | 4.219741  | -0.514554 | -2.045894 |
| 6  | 3.485797  | -3.184592 | 0.689543  |
| 1  | 2.069217  | -1.746284 | 1.494283  |
| 6  | 4.418598  | -3.462058 | -0.317956 |
| 1  | 5.413526  | -2.728563 | -2.097034 |
| 1  | 3.256467  | -3.935434 | 1.450064  |
| 1  | 4.926068  | -4.430852 | -0.339920 |
| 7  | -0.047183 | -1.658312 | 2.965695  |
| 6  | -0.758685 | -0.866733 | 2.474625  |

**Structure S18. int6**

E(RB3LYP)sol = -819.740845297 E(RB3LYP)gas = -  
818.767901997

|   |           |           |           |
|---|-----------|-----------|-----------|
| 6 | -5.303556 | -0.687592 | 0.052431  |
| 6 | -4.909039 | 0.655177  | -0.001767 |
| 6 | -3.562456 | 1.014505  | -0.028097 |
| 6 | -2.530380 | 0.033297  | 0.000048  |
| 6 | -2.954708 | -1.322718 | 0.054108  |
| 6 | -4.304988 | -1.669023 | 0.079481  |
| 1 | -6.362315 | -0.963656 | 0.072534  |
| 1 | -5.668316 | 1.444894  | -0.025016 |
| 1 | -3.260323 | 2.061777  | -0.074176 |
| 1 | -2.220303 | -2.125638 | 0.077509  |
| 1 | -4.579433 | -2.728511 | 0.121452  |
| 6 | -1.129599 | 0.429550  | -0.027464 |
| 1 | 1.327572  | 2.509136  | -0.267967 |
| 6 | 0.048236  | -0.399467 | -0.015103 |
| 6 | 1.207891  | 0.404595  | -0.044570 |
| 7 | 0.741907  | 1.714916  | -0.051140 |
| 6 | 2.620464  | 0.109007  | -0.013096 |
| 6 | 3.156678  | -1.177274 | -0.304620 |
| 6 | 3.564855  | 1.129696  | 0.299534  |
| 6 | 4.527356  | -1.412218 | -0.285448 |
| 1 | 2.484371  | -1.995794 | -0.557605 |
| 6 | 4.936386  | 0.884452  | 0.306924  |
| 1 | 3.211374  | 2.125737  | 0.577376  |
| 6 | 5.440294  | -0.388377 | 0.014248  |
| 1 | 4.894152  | -2.416841 | -0.518765 |
| 1 | 5.622712  | 1.699804  | 0.558371  |
| 1 | 6.516492  | -0.580814 | 0.021575  |
| 7 | -1.334167 | 2.926213  | -0.155296 |
| 6 | -0.655223 | 1.810392  | -0.082826 |
| 1 | -0.689066 | 3.722815  | -0.171591 |
| 7 | 0.186585  | -2.976379 | 0.156867  |
| 6 | 0.108255  | -1.815025 | 0.085097  |

**Structure S19. TS6**

E(RB3LYP)sol = -1507.24911595 E(RB3LYP)gas = -

Frequencies -- -249.2426  
Red. masses -- 11.0438

|            |    |          |  |   |           |           |          |
|------------|----|----------|--|---|-----------|-----------|----------|
| Frc consts | -- | 0.4042   |  | 7 | -1.846691 | -2.848918 | 2.466690 |
| IR Inten   | -- | 373.2481 |  | 6 | -1.759902 | -2.066641 | 1.613808 |

**Structure S20. TS7**

E(RB3LYP)sol = -1507.22524392    E(RB3LYP)gas = -  
1505.74089811

|    |           |           |           |
|----|-----------|-----------|-----------|
| 6  | -5.471237 | 0.217696  | -1.052267 |
| 6  | -5.369223 | -1.032537 | -0.437620 |
| 6  | -4.140873 | -1.461381 | 0.079172  |
| 6  | -3.001628 | -0.651512 | -0.020130 |
| 6  | -3.106478 | 0.605171  | -0.643126 |
| 6  | -4.335889 | 1.032071  | -1.149246 |
| 1  | -6.430590 | 0.558015  | -1.453397 |
| 1  | -6.248425 | -1.678286 | -0.352450 |
| 1  | -4.071236 | -2.433847 | 0.574275  |
| 1  | -2.224197 | 1.240498  | -0.758341 |
| 1  | -4.401124 | 2.013166  | -1.627758 |
| 6  | -1.630875 | -1.107800 | 0.497030  |
| 1  | -1.119701 | -0.225038 | 0.911832  |
| 6  | -0.705052 | -1.712057 | -0.546216 |
| 1  | -1.026939 | -2.659032 | -0.999313 |
| 6  | 0.460956  | -1.018579 | -1.013203 |
| 7  | -0.174212 | -0.034447 | -1.537020 |
| 6  | 1.885397  | -1.385545 | -0.994554 |
| 6  | 2.300914  | -2.507023 | -0.256755 |
| 6  | 2.844249  | -0.616436 | -1.681522 |
| 6  | 3.649356  | -2.864645 | -0.210236 |
| 1  | 1.547408  | -3.077116 | 0.294102  |
| 6  | 4.193821  | -0.966538 | -1.614444 |
| 1  | 2.533231  | 0.275203  | -2.229496 |
| 6  | 4.601372  | -2.091760 | -0.886505 |
| 1  | 3.962721  | -3.739124 | 0.367475  |
| 1  | 4.934945  | -0.352312 | -2.133621 |
| 1  | 5.660570  | -2.361749 | -0.840053 |
| 16 | 0.755777  | 2.078296  | -1.023759 |
| 8  | 2.048240  | 2.624476  | -1.582173 |
| 8  | -0.443819 | 2.990268  | -1.038231 |
| 6  | 1.094910  | 1.824158  | 0.778723  |
| 6  | 2.342583  | 1.346568  | 1.187116  |
| 6  | 0.052948  | 1.972556  | 1.698185  |
| 6  | 2.543990  | 0.999964  | 2.526550  |
| 1  | 3.140670  | 1.252757  | 0.447367  |
| 6  | 0.257390  | 1.624479  | 3.037772  |
| 1  | -0.901697 | 2.369223  | 1.342192  |
| 6  | 1.500825  | 1.131483  | 3.451691  |
| 1  | 3.517457  | 0.619005  | 2.849760  |
| 1  | -0.555936 | 1.734402  | 3.761417  |
| 1  | 1.656047  | 0.846950  | 4.496365  |

Frequencies -- -368.9274

Red. masses -- 5.2109

Frc consts -- 0.4179

IR Inten -- 366.5893

**Structure S21. int7**

E(RB3LYP)sol = -726.662278279    E(RB3LYP)gas = -  
725.856062557

|   |           |           |           |
|---|-----------|-----------|-----------|
| 6 | -5.212827 | -0.564150 | 0.109010  |
| 6 | -4.792741 | 0.764805  | 0.195189  |
| 6 | -3.440611 | 1.088886  | 0.035180  |
| 6 | -2.497629 | 0.084307  | -0.212424 |
| 6 | -2.924123 | -1.251645 | -0.296002 |
| 6 | -4.273170 | -1.572106 | -0.136744 |
| 1 | -6.269013 | -0.816101 | 0.233414  |
| 1 | -5.518424 | 1.558917  | 0.388418  |
| 1 | -3.121553 | 2.131586  | 0.103845  |
| 1 | -2.189565 | -2.040049 | -0.476415 |
| 1 | -4.592832 | -2.615156 | -0.204027 |
| 6 | -1.008463 | 0.374982  | -0.392201 |
| 1 | -0.706194 | 0.046504  | -1.402919 |
| 6 | -0.137366 | -0.393449 | 0.614036  |
| 1 | -0.468204 | -0.284758 | 1.656480  |
| 6 | 1.220001  | -0.793740 | 0.308291  |
| 7 | 0.406673  | -1.757493 | 0.206940  |
| 6 | 2.616127  | -0.442797 | 0.157948  |
| 6 | 3.012430  | 0.899889  | 0.295031  |
| 6 | 3.570727  | -1.436928 | -0.131176 |
| 6 | 4.357028  | 1.242940  | 0.143632  |
| 1 | 2.260474  | 1.664592  | 0.505308  |
| 6 | 4.911033  | -1.086016 | -0.276901 |
| 1 | 3.245929  | -2.474881 | -0.235204 |
| 6 | 5.304072  | 0.252682  | -0.139622 |
| 1 | 4.667156  | 2.285498  | 0.245220  |
| 1 | 5.655779  | -1.854195 | -0.498754 |
| 1 | 6.356461  | 0.524052  | -0.256197 |
| 7 | -0.340810 | 2.908525  | -0.192632 |
| 6 | -0.667998 | 1.801803  | -0.299801 |

**Structure S22. TS8**

E(RB3LYP)sol = -1600.24920401    E(RB3LYP)gas = -  
1598.48138817

|   |           |           |           |
|---|-----------|-----------|-----------|
| 6 | -4.939503 | -1.035431 | -1.488841 |
|---|-----------|-----------|-----------|

|    |           |           |           |
|----|-----------|-----------|-----------|
| 6  | -4.752384 | -1.702386 | -0.274017 |
| 6  | -3.624859 | -1.432678 | 0.507144  |
| 6  | -2.667731 | -0.493361 | 0.092239  |
| 6  | -2.856578 | 0.171413  | -1.129626 |
| 6  | -3.986549 | -0.102027 | -1.908757 |
| 1  | -5.819149 | -1.247550 | -2.106668 |
| 1  | -5.481912 | -2.444170 | 0.067161  |
| 1  | -3.477651 | -1.963309 | 1.448956  |
| 1  | -2.107602 | 0.875328  | -1.497714 |
| 1  | -4.109748 | 0.420366  | -2.862688 |
| 6  | -1.442510 | -0.187333 | 0.960795  |
| 1  | -1.102459 | 0.824419  | 0.695509  |
| 6  | -0.200182 | -1.103731 | 0.812716  |
| 1  | 0.266578  | -1.316257 | 1.777935  |
| 6  | 0.722552  | -0.790584 | -0.226145 |
| 7  | 0.239474  | -0.033040 | -1.320604 |
| 6  | 2.033970  | -1.408001 | -0.213903 |
| 6  | 2.417866  | -2.406404 | 0.737555  |
| 6  | 3.029572  | -1.051149 | -1.175063 |
| 6  | 3.706013  | -2.937599 | 0.761917  |
| 1  | 1.679740  | -2.810654 | 1.430212  |
| 6  | 4.311175  | -1.593793 | -1.136888 |
| 1  | 2.773124  | -0.318484 | -1.940319 |
| 6  | 4.681922  | -2.536311 | -0.162938 |
| 1  | 3.946651  | -3.702976 | 1.510280  |
| 1  | 5.042033  | -1.273132 | -1.889848 |
| 1  | 5.692929  | -2.957595 | -0.137077 |
| 16 | 0.641769  | 1.447426  | -1.671640 |
| 8  | 1.954616  | 1.662530  | -2.354195 |
| 8  | -0.498041 | 2.113234  | -2.376875 |
| 6  | 0.832033  | 2.355834  | -0.095599 |
| 6  | 1.855511  | 1.979354  | 0.789501  |
| 6  | -0.128529 | 3.294466  | 0.297678  |
| 6  | 1.900955  | 2.544894  | 2.068761  |
| 1  | 2.612672  | 1.263666  | 0.463586  |
| 6  | -0.065089 | 3.871138  | 1.570167  |
| 1  | -0.919736 | 3.544347  | -0.413571 |
| 6  | 0.946882  | 3.490260  | 2.462951  |
| 1  | 2.686313  | 2.237554  | 2.766942  |
| 1  | -0.811845 | 4.613133  | 1.872601  |
| 1  | 0.984719  | 3.923136  | 3.467803  |
| 7  | -2.156091 | -0.023049 | 3.489966  |
| 6  | -1.839434 | -0.107934 | 2.376350  |
| 7  | -0.625859 | -4.026784 | 0.875280  |
| 6  | -0.931473 | -2.894075 | 0.812201  |

IR Inten -- 764.3115

**Structure S23. int8**

E(RB3LYP)sol = -1600.26089718 E(RB3LYP)gas = -  
1598.50129417

|    |           |           |           |
|----|-----------|-----------|-----------|
| 6  | -4.983353 | -0.935695 | -1.420212 |
| 6  | -4.795854 | -1.634149 | -0.223541 |
| 6  | -3.646341 | -1.413129 | 0.540030  |
| 6  | -2.667401 | -0.495051 | 0.126287  |
| 6  | -2.853422 | 0.197529  | -1.082555 |
| 6  | -4.008027 | -0.024893 | -1.840205 |
| 1  | -5.881296 | -1.105535 | -2.024230 |
| 1  | -5.542000 | -2.359064 | 0.117409  |
| 1  | -3.504632 | -1.965796 | 1.471618  |
| 1  | -2.090325 | 0.886619  | -1.452847 |
| 1  | -4.133601 | 0.521647  | -2.779995 |
| 6  | -1.412857 | -0.268061 | 0.970315  |
| 1  | -0.998482 | 0.717392  | 0.721043  |
| 6  | -0.213046 | -1.280533 | 0.745225  |
| 1  | 0.315493  | -1.351629 | 1.714166  |
| 6  | 0.791215  | -0.805081 | -0.310371 |
| 7  | 0.231499  | -0.016253 | -1.319392 |
| 6  | 2.105190  | -1.329230 | -0.253054 |
| 6  | 2.559309  | -2.281463 | 0.740549  |
| 6  | 3.122517  | -0.931372 | -1.201971 |
| 6  | 3.878014  | -2.718206 | 0.804042  |
| 1  | 1.851878  | -2.707308 | 1.456157  |
| 6  | 4.427774  | -1.391536 | -1.119688 |
| 1  | 2.841745  | -0.231476 | -1.989004 |
| 6  | 4.852339  | -2.287073 | -0.113595 |
| 1  | 4.152329  | -3.437663 | 1.587941  |
| 1  | 5.150443  | -1.040625 | -1.868861 |
| 1  | 5.887632  | -2.639440 | -0.057431 |
| 16 | 0.605856  | 1.491090  | -1.673422 |
| 8  | 1.872398  | 1.708739  | -2.431183 |
| 8  | -0.583743 | 2.134585  | -2.318830 |
| 6  | 0.834466  | 2.324979  | -0.083291 |
| 6  | 1.857696  | 1.851094  | 0.767730  |
| 6  | -0.177974 | 3.150667  | 0.430197  |
| 6  | 1.843293  | 2.213440  | 2.120967  |
| 1  | 2.667435  | 1.244406  | 0.357905  |
| 6  | -0.165840 | 3.528487  | 1.774168  |
| 1  | -0.974612 | 3.464460  | -0.249642 |
| 6  | 0.842944  | 3.047159  | 2.630839  |
| 1  | 2.623751  | 1.827779  | 2.785786  |
| 1  | -0.947071 | 4.189838  | 2.164701  |
| 1  | 0.834818  | 3.312586  | 3.692913  |
| 7  | -2.060740 | -0.213275 | 3.520448  |

-----  
Frequencies -- -427.7573  
Red. masses -- 10.6036  
Frc consts -- 1.1431



|   |           |           |          |   |          |          |           |
|---|-----------|-----------|----------|---|----------|----------|-----------|
| 6 | -1.767077 | -0.232571 | 2.396669 | 1 | 4.090316 | 2.181493 | 0.213342  |
| 7 | -1.087549 | -3.737353 | 0.325957 | 1 | 4.149385 | 1.115000 | -2.037455 |
| 6 | -0.730050 | -2.645655 | 0.507820 | 7 | 1.277813 | 0.451527 | 3.118075  |

|   |           |           |          |
|---|-----------|-----------|----------|
| 6 | 1.092543  | -0.183919 | 2.146590 |
| 7 | -1.376755 | -3.412782 | 2.652170 |
| 6 | -1.064543 | -2.690843 | 1.785243 |

**Structure S24. TS9**

E(RB3LYP)sol = -1600.26174116 E(RB3LYP)gas = -  
1598.49906858

|    |           |           |           |
|----|-----------|-----------|-----------|
| 6  | 4.455718  | -2.143954 | -1.177879 |
| 6  | 4.532802  | -1.521123 | 0.080720  |
| 6  | 3.390451  | -1.159122 | 0.781793  |
| 6  | 2.070977  | -1.380404 | 0.266378  |
| 6  | 2.023358  | -2.046421 | -0.999188 |
| 6  | 3.175863  | -2.408497 | -1.690176 |
| 1  | 5.358156  | -2.426768 | -1.728986 |
| 1  | 5.514264  | -1.310473 | 0.523581  |
| 1  | 3.489849  | -0.667752 | 1.752508  |
| 1  | 1.055417  | -2.246822 | -1.461892 |
| 1  | 3.072340  | -2.900914 | -2.664977 |
| 6  | 0.900855  | -0.917336 | 0.961731  |
| 1  | -0.984619 | 0.968845  | 2.056154  |
| 6  | -0.469114 | -1.239932 | 0.527068  |
| 1  | -0.475616 | -1.942515 | -0.305189 |
| 6  | -1.518925 | -0.254349 | 0.419216  |
| 7  | -1.397511 | 0.987289  | 1.121600  |
| 6  | -2.786177 | -0.565657 | -0.182467 |
| 6  | -3.084613 | -1.862947 | -0.710110 |
| 6  | -3.841876 | 0.394559  | -0.289622 |
| 6  | -4.306883 | -2.149259 | -1.317165 |
| 1  | -2.356388 | -2.667671 | -0.604845 |
| 6  | -5.056781 | 0.091571  | -0.891089 |
| 1  | -3.662318 | 1.399978  | 0.088239  |
| 6  | -5.316348 | -1.183455 | -1.426738 |
| 1  | -4.479767 | -3.163042 | -1.699513 |
| 1  | -5.825056 | 0.872761  | -0.951831 |
| 1  | -6.274398 | -1.414720 | -1.904282 |
| 16 | -0.828941 | 2.381289  | 0.359691  |
| 8  | -1.741923 | 2.705615  | -0.750944 |
| 8  | -0.603081 | 3.371896  | 1.429105  |
| 6  | 0.755781  | 2.036971  | -0.421812 |
| 6  | 0.771257  | 1.450415  | -1.691533 |
| 6  | 1.937986  | 2.312182  | 0.270901  |
| 6  | 2.001458  | 1.129285  | -2.271543 |
| 1  | -0.174432 | 1.248597  | -2.195510 |
| 6  | 3.158519  | 1.999463  | -0.328805 |
| 1  | 1.878687  | 2.719940  | 1.280648  |
| 6  | 3.193164  | 1.409164  | -1.597876 |
| 1  | 2.029613  | 0.632762  | -3.245067 |

-----  
Frequencies -- -373.0715  
Red. masses -- 12.0212  
Frc consts -- 0.9858  
IR Inten -- 405.6994

**Structure S25. int9**

E(RB3LYP)sol = -1600.27339475 E(RB3LYP)gas = -  
1598.51966685

|    |           |           |           |
|----|-----------|-----------|-----------|
| 6  | 4.000275  | -2.410467 | -1.376705 |
| 6  | 4.288288  | -1.794914 | -0.144375 |
| 6  | 3.280552  | -1.334815 | 0.690720  |
| 6  | 1.889094  | -1.458877 | 0.357472  |
| 6  | 1.626151  | -2.096473 | -0.899305 |
| 6  | 2.648209  | -2.552588 | -1.726581 |
| 1  | 4.798653  | -2.769170 | -2.033978 |
| 1  | 5.332694  | -1.666185 | 0.166984  |
| 1  | 3.542244  | -0.852477 | 1.635867  |
| 1  | 0.594307  | -2.188018 | -1.245512 |
| 1  | 2.381266  | -3.016476 | -2.684253 |
| 6  | 0.859231  | -0.970858 | 1.220782  |
| 1  | -0.985398 | 1.144659  | 2.002592  |
| 6  | -0.616806 | -1.308625 | 1.004489  |
| 1  | -0.640144 | -2.131942 | 0.274729  |
| 6  | -1.554832 | -0.211013 | 0.504940  |
| 7  | -1.359040 | 1.083939  | 1.052923  |
| 6  | -2.769310 | -0.525205 | -0.157662 |
| 6  | -3.128270 | -1.865442 | -0.551620 |
| 6  | -3.748527 | 0.475465  | -0.503368 |
| 6  | -4.306983 | -2.152225 | -1.235328 |
| 1  | -2.471715 | -2.699456 | -0.293313 |
| 6  | -4.921334 | 0.165020  | -1.173299 |
| 1  | -3.527785 | 1.512301  | -0.252849 |
| 6  | -5.234922 | -1.153227 | -1.566613 |
| 1  | -4.513904 | -3.196542 | -1.504955 |
| 1  | -5.619831 | 0.979158  | -1.408625 |
| 1  | -6.160964 | -1.386580 | -2.102160 |
| 16 | -0.660171 | 2.385381  | 0.207261  |
| 8  | -1.524024 | 2.693641  | -0.947757 |
| 8  | -0.408322 | 3.427409  | 1.223860  |
| 6  | 0.920727  | 1.920181  | -0.511617 |
| 6  | 0.937474  | 1.286159  | -1.758532 |

|       |           |           |           |   |           |           |           |
|-------|-----------|-----------|-----------|---|-----------|-----------|-----------|
| 6     | 2.100800  | 2.171666  | 0.195864  | 8 | 0.941031  | 3.226235  | -1.461834 |
| 6     | 2.166451  | 0.911110  | -2.309464 | 6 | -1.267885 | 2.438784  | -0.235273 |
| 1     | -0.005265 | 1.102385  | -2.274731 | 6 | -1.876556 | 2.419902  | 1.020167  |
| 6     | 3.319081  | 1.807316  | -0.375965 | 6 | -2.009348 | 2.492493  | -1.421364 |
| 1     | 2.039985  | 2.612219  | 1.191886  | 6 | -3.273290 | 2.429461  | 1.087728  |
| 6     | 3.355352  | 1.182613  | -1.630268 | 1 | -1.264666 | 2.376685  | 1.921605  |
| 1     | 2.193726  | 0.380537  | -3.264698 | 6 | -3.401326 | 2.505141  | -1.337642 |
| 1     | 4.247852  | 1.979740  | 0.175066  | 1 | -1.497009 | 2.530376  | -2.384381 |
| 1     | 4.308919  | 0.854575  | -2.051035 | 6 | -4.031109 | 2.469167  | -0.085416 |
| 7     | 1.504298  | 0.515641  | 3.227434  | 1 | -3.762403 | 2.387448  | 2.062905  |
| 6     | 1.205701  | -0.177245 | 2.323521  | 1 | -3.999308 | 2.545219  | -2.251146 |
| 7     | -1.628991 | -2.403362 | 3.206071  | 1 | -5.122309 | 2.471691  | -0.027401 |
| 6     | -1.167568 | -1.935347 | 2.246080  | 7 | -2.162823 | -0.413537 | 2.913942  |
| ----- |           |           |           | 6 | -1.665752 | -0.655970 | 1.895941  |
|       |           |           |           | 1 | 1.429521  | 0.900252  | -1.717799 |

### Structure S26. int10

E(RB3LYP)sol = -1507.79202358 E(RB3LYP)gas = -  
1506.35548936

|    |           |           |           |
|----|-----------|-----------|-----------|
| 6  | -2.182779 | -4.754972 | -1.146076 |
| 6  | -2.475293 | -4.506671 | 0.196880  |
| 6  | -2.120979 | -3.285968 | 0.783093  |
| 6  | -1.469897 | -2.305156 | 0.026583  |
| 6  | -1.175236 | -2.559972 | -1.322084 |
| 6  | -1.531431 | -3.775990 | -1.906050 |
| 1  | -2.461997 | -5.708043 | -1.602162 |
| 1  | -2.985115 | -5.264962 | 0.796522  |
| 1  | -2.360723 | -3.095782 | 1.831920  |
| 1  | -0.659535 | -1.795765 | -1.910079 |
| 1  | -1.301173 | -3.961431 | -2.958297 |
| 6  | -1.019088 | -0.961926 | 0.612430  |
| 1  | -1.318090 | -0.168280 | -0.088826 |
| 6  | 0.488626  | -0.946863 | 0.757856  |
| 1  | 0.899116  | -1.648610 | 1.486764  |
| 6  | 1.340640  | -0.203491 | 0.023805  |
| 7  | 0.853377  | 0.784838  | -0.883468 |
| 6  | 2.814639  | -0.386630 | 0.086147  |
| 6  | 3.372804  | -1.669957 | 0.237159  |
| 6  | 3.681258  | 0.717926  | -0.019959 |
| 6  | 4.756196  | -1.842366 | 0.302616  |
| 1  | 2.714413  | -2.540822 | 0.277659  |
| 6  | 5.064628  | 0.541902  | 0.045436  |
| 1  | 3.272418  | 1.724166  | -0.120617 |
| 6  | 5.607515  | -0.736467 | 0.208408  |
| 1  | 5.172158  | -2.846893 | 0.414302  |
| 1  | 5.721709  | 1.412243  | -0.025151 |
| 1  | 6.691010  | -0.871644 | 0.255110  |
| 16 | 0.516266  | 2.385290  | -0.339069 |
| 8  | 1.056447  | 2.555783  | 1.010403  |

### Structure S27. TS10

E(RB3LYP)sol = -1600.76251971 E(RB3LYP)gas = -  
1599.15199981

|   |           |          |           |
|---|-----------|----------|-----------|
| 6 | 1.733536  | 4.286279 | -1.479175 |
| 6 | 0.832663  | 4.427421 | -0.415965 |
| 6 | 0.603273  | 3.363111 | 0.456970  |
| 6 | 1.270304  | 2.141199 | 0.283711  |
| 6 | 2.174618  | 2.008863 | -0.778951 |
| 6 | 2.403829  | 3.074033 | -1.657843 |
| 1 | 1.907595  | 5.118491 | -2.166695 |
| 1 | 0.301256  | 5.371820 | -0.270244 |
| 1 | -0.105383 | 3.474413 | 1.280961  |
| 1 | 2.693785  | 1.057752 | -0.922718 |
| 1 | 3.105845  | 2.950177 | -2.486874 |
| 6 | 1.010145  | 0.964818 | 1.227494  |
| 1 | 1.550309  | 0.087989 | 0.842407  |
| 6 | -0.476371 | 0.600696 | 1.315560  |
| 1 | -1.034355 | 1.202672 | 2.034334  |
| 6 | -1.163296 | 0.273595 | 0.136194  |
| 7 | -0.441337 | 0.012763 | -1.059807 |
| 6 | -2.617867 | 0.174015 | 0.092979  |
| 6 | -3.398487 | 0.144355 | 1.276227  |
| 6 | -3.315899 | 0.101782 | -1.138056 |
| 6 | -4.792219 | 0.095416 | 1.222962  |
| 1 | -2.904017 | 0.111399 | 2.248656  |
| 6 | -4.706647 | 0.052422 | -1.182932 |
| 1 | -2.740897 | 0.077027 | -2.064879 |
| 6 | -5.464475 | 0.058320 | -0.003613 |
| 1 | -5.360343 | 0.066634 | 2.158360  |
| 1 | -5.209149 | 0.002416 | -2.154433 |
| 1 | -6.556746 | 0.014302 | -0.041215 |

|    |           |           |           |
|----|-----------|-----------|-----------|
| 16 | -0.079289 | -1.474641 | -1.727883 |
| 8  | -1.178957 | -2.401266 | -1.460872 |
| 8  | 0.380780  | -1.179341 | -3.095307 |
| 6  | 1.350215  | -2.062745 | -0.805247 |
| 6  | 1.142655  | -2.669012 | 0.434105  |
| 6  | 2.636785  | -1.787834 | -1.283380 |
| 6  | 2.249410  | -2.969793 | 1.232737  |
| 1  | 0.132349  | -2.855441 | 0.798303  |
| 6  | 3.736600  | -2.115132 | -0.486554 |
| 1  | 2.752229  | -1.324171 | -2.265023 |
| 6  | 3.541885  | -2.694688 | 0.774981  |
| 1  | 2.078568  | -3.386582 | 2.227362  |
| 1  | 4.748803  | -1.907483 | -0.844795 |
| 1  | 4.404435  | -2.923351 | 1.406898  |
| 7  | 2.090383  | 1.611030  | 3.536574  |
| 6  | 1.592311  | 1.275201  | 2.545004  |
| 1  | 0.040591  | 0.756235  | -1.561768 |
| 7  | -0.538230 | -1.992286 | 3.115141  |
| 6  | -0.330727 | -0.921613 | 2.688386  |

-----  
Frequencies -- -263.5716  
Red. masses -- 10.1046  
Frc consts -- 0.4136  
IR Inten -- 321.0813

**Structure S28. int11**

E(RB3LYP)sol = -1600.77739038 E(RB3LYP)gas = -  
1599.17785287

|    |           |           |           |
|----|-----------|-----------|-----------|
| 6  | -4.821585 | -0.447738 | 1.203536  |
| 1  | -3.034835 | -0.035426 | 2.305792  |
| 6  | -4.565155 | -1.026704 | -1.113315 |
| 1  | -2.563764 | -1.050327 | -1.888378 |
| 6  | -5.412589 | -0.815580 | -0.012031 |
| 1  | -5.448604 | -0.301988 | 2.090569  |
| 1  | -4.991230 | -1.337798 | -2.073880 |
| 1  | -6.493799 | -0.955295 | -0.095600 |
| 16 | 0.347062  | -1.778639 | -1.417324 |
| 8  | -0.303919 | -2.944463 | -0.813992 |
| 8  | 0.491822  | -1.627199 | -2.878616 |
| 6  | 2.004916  | -1.685597 | -0.713020 |
| 6  | 2.230516  | -2.203040 | 0.565073  |
| 6  | 2.992820  | -0.964583 | -1.392663 |
| 6  | 3.463966  | -1.971912 | 1.181954  |
| 1  | 1.436051  | -2.748158 | 1.076204  |
| 6  | 4.225144  | -0.749344 | -0.771185 |
| 1  | 2.777666  | -0.581725 | -2.392154 |
| 6  | 4.458353  | -1.245016 | 0.518779  |
| 1  | 3.635727  | -2.349054 | 2.192989  |
| 1  | 5.005897  | -0.187323 | -1.291413 |
| 1  | 5.417629  | -1.058973 | 1.009238  |
| 7  | 1.747564  | 2.319125  | 3.366666  |
| 6  | 1.315465  | 1.806180  | 2.420284  |
| 1  | -0.433832 | 0.291327  | -1.667837 |
| 7  | 0.165698  | -1.624519 | 3.185969  |
| 6  | -0.130367 | -0.745963 | 2.486265  |

**Structure S29. TS11**

E(RB3LYP)sol = -1600.76493040 E(RB3LYP)gas = -  
1599.17602950

|   |           |           |           |
|---|-----------|-----------|-----------|
| 6 | 0.111516  | 4.180219  | -1.857962 |
| 6 | -0.920751 | 3.856010  | -0.970144 |
| 6 | -0.721302 | 2.894918  | 0.025935  |
| 6 | 0.514673  | 2.244329  | 0.140537  |
| 6 | 1.540811  | 2.565578  | -0.757508 |
| 6 | 1.345441  | 3.533433  | -1.748688 |
| 1 | -0.050362 | 4.928760  | -2.638641 |
| 1 | -1.893959 | 4.346064  | -1.057906 |
| 1 | -1.541222 | 2.638376  | 0.698383  |
| 1 | 2.496132  | 2.038365  | -0.686260 |
| 1 | 2.155400  | 3.770771  | -2.443936 |
| 6 | 0.762885  | 1.182785  | 1.208018  |
| 1 | 1.533315  | 0.497726  | 0.822602  |
| 6 | -0.504891 | 0.322722  | 1.526861  |
| 1 | -1.213765 | 0.971604  | 2.076819  |
| 6 | -1.160287 | -0.203766 | 0.271383  |
| 7 | -0.349981 | -0.334843 | -0.862650 |
| 6 | -2.561418 | -0.450879 | 0.206484  |
| 6 | -3.443251 | -0.278575 | 1.321656  |
| 6 | -3.190183 | -0.858101 | -1.014987 |

|   |           |           |           |
|---|-----------|-----------|-----------|
| 6 | -5.187955 | 0.860315  | 1.028268  |
| 6 | -4.851655 | 1.312029  | -0.251248 |
| 6 | -3.745041 | 0.772603  | -0.914166 |
| 6 | -2.959703 | -0.212945 | -0.304083 |
| 6 | -3.298658 | -0.662051 | 0.980503  |
| 6 | -4.409451 | -0.129347 | 1.639174  |
| 1 | -6.053703 | 1.279425  | 1.549187  |
| 1 | -5.452561 | 2.085469  | -0.737692 |
| 1 | -3.493517 | 1.118055  | -1.920899 |
| 1 | -2.660959 | -1.404201 | 1.465784  |
| 1 | -4.662488 | -0.483767 | 2.642398  |
| 6 | -1.758890 | -0.816730 | -1.029835 |
| 1 | -1.326220 | -1.595389 | -0.382577 |
| 6 | -0.629375 | 0.226991  | -1.326218 |
| 1 | -1.075214 | 1.021577  | -1.957682 |
| 6 | -0.052025 | 0.818438  | -0.052048 |

|    |           |           |           |
|----|-----------|-----------|-----------|
| 7  | -0.402307 | 0.187943  | 1.124155  |
| 6  | 0.807765  | 1.958290  | -0.083066 |
| 6  | 1.096115  | 2.690556  | -1.279830 |
| 6  | 1.421145  | 2.467192  | 1.109663  |
| 6  | 1.890892  | 3.831845  | -1.270044 |
| 1  | 0.699551  | 2.345009  | -2.236842 |
| 6  | 2.214662  | 3.611121  | 1.100222  |
| 1  | 1.279735  | 1.935664  | 2.054689  |
| 6  | 2.462110  | 4.319761  | -0.084081 |
| 1  | 2.078808  | 4.351477  | -2.216127 |
| 1  | 2.658042  | 3.952817  | 2.042056  |
| 1  | 3.091010  | 5.213893  | -0.086719 |
| 16 | 0.577943  | -1.216871 | 1.879219  |
| 8  | 1.054538  | -0.803574 | 3.222720  |
| 8  | -0.297848 | -2.415186 | 1.783277  |
| 6  | 1.980226  | -1.532448 | 0.779176  |
| 6  | 2.954731  | -0.547107 | 0.607879  |
| 6  | 2.017679  | -2.729553 | 0.059498  |
| 6  | 3.986320  | -0.769951 | -0.306003 |
| 1  | 2.897788  | 0.391377  | 1.162295  |
| 6  | 3.063247  | -2.948483 | -0.838663 |
| 1  | 1.223747  | -3.463626 | 0.208259  |
| 6  | 4.040890  | -1.966812 | -1.027081 |
| 1  | 4.737415  | 0.007126  | -0.468818 |
| 1  | 3.100535  | -3.877873 | -1.412765 |
| 1  | 4.840048  | -2.127785 | -1.755587 |
| 7  | -2.604554 | -1.973795 | -3.236159 |
| 6  | -2.214078 | -1.471573 | -2.266605 |
| 1  | -0.435536 | 0.804629  | 1.938151  |
| 7  | 1.261641  | -0.849330 | -2.827984 |
| 6  | 0.415955  | -0.396739 | -2.175191 |

-----  
 Frequencies -- -200.3615  
 Red. masses -- 9.1766  
 Frc consts -- 0.2171  
 IR Inten -- 241.0007

### Structure S30. int12

E(RB3LYP)sol = -820.199765206 E(RB3LYP)gas = -  
 819.278550472

|   |           |           |           |
|---|-----------|-----------|-----------|
| 6 | -2.656933 | -3.024980 | 0.446883  |
| 6 | -2.501296 | -2.120382 | 1.502099  |
| 6 | -2.192742 | -0.783924 | 1.238252  |
| 6 | -2.032333 | -0.338677 | -0.082147 |
| 6 | -2.192082 | -1.248681 | -1.135716 |
| 6 | -2.504499 | -2.585338 | -0.871350 |
| 1 | -2.902110 | -4.070024 | 0.652237  |
| 1 | -2.627657 | -2.453995 | 2.534970  |

|   |           |           |           |
|---|-----------|-----------|-----------|
| 1 | -2.092787 | -0.077200 | 2.066992  |
| 1 | -2.054383 | -0.907784 | -2.163532 |
| 1 | -2.630281 | -3.285742 | -1.700897 |
| 6 | -1.646188 | 1.111165  | -0.367687 |
| 1 | -1.768995 | 1.317831  | -1.441010 |
| 6 | -0.138374 | 1.360410  | -0.028030 |
| 1 | 0.022125  | 1.081231  | 1.025146  |
| 6 | 0.779562  | 0.502874  | -0.927902 |
| 7 | 0.410863  | 0.339184  | -2.134738 |
| 6 | 2.008565  | -0.065651 | -0.303905 |
| 6 | 2.742236  | 0.648572  | 0.660792  |
| 6 | 2.453250  | -1.343655 | -0.688073 |
| 6 | 3.906082  | 0.104411  | 1.207926  |
| 1 | 2.425630  | 1.648592  | 0.965511  |
| 6 | 3.608703  | -1.890901 | -0.129356 |
| 1 | 1.870363  | -1.924525 | -1.407518 |
| 6 | 4.340725  | -1.165871 | 0.816905  |
| 1 | 4.476637  | 0.677206  | 1.942858  |
| 1 | 3.934523  | -2.890617 | -0.426707 |
| 1 | 5.246844  | -1.593169 | 1.253361  |
| 7 | -3.170742 | 2.761415  | 0.994536  |
| 6 | -2.501794 | 2.044717  | 0.377929  |
| 1 | 1.092805  | -0.211932 | -2.665808 |
| 7 | 0.576196  | 3.875485  | -0.280188 |
| 6 | 0.242628  | 2.772167  | -0.165435 |

### Structure S31. TS12

E(RB3LYP)sol = -819.677132478 E(RB3LYP)gas = -  
 818.694316548

|   |           |           |           |
|---|-----------|-----------|-----------|
| 6 | 4.702952  | -1.458995 | -0.900243 |
| 6 | 4.686307  | -0.074240 | -1.107994 |
| 6 | 3.562408  | 0.679708  | -0.772863 |
| 6 | 2.406547  | 0.074796  | -0.226129 |
| 6 | 2.448805  | -1.320590 | 0.003849  |
| 6 | 3.578109  | -2.068786 | -0.334980 |
| 1 | 5.584953  | -2.050425 | -1.162424 |
| 1 | 5.559972  | 0.426017  | -1.537577 |
| 1 | 3.568512  | 1.759849  | -0.938860 |
| 1 | 1.615499  | -1.814321 | 0.506166  |
| 1 | 3.581736  | -3.144516 | -0.134304 |
| 6 | 1.207722  | 0.873425  | 0.098373  |
| 1 | -0.670840 | 2.671619  | 0.942069  |
| 6 | -0.039019 | 0.268526  | 0.282413  |
| 1 | -0.108866 | -0.726938 | -0.150626 |
| 6 | -1.353404 | 0.990045  | 0.338650  |
| 7 | -1.542978 | 2.209146  | 0.674692  |
| 6 | -2.563257 | 0.210893  | -0.109244 |

|   |           |           |           |
|---|-----------|-----------|-----------|
| 6 | -2.663511 | -1.186448 | 0.011843  |
| 6 | -3.647023 | 0.914863  | -0.664675 |
| 6 | -3.812166 | -1.856369 | -0.421249 |
| 1 | -1.862624 | -1.748507 | 0.495136  |
| 6 | -4.788440 | 0.244275  | -1.105224 |
| 1 | -3.566202 | 2.000990  | -0.736882 |
| 6 | -4.875709 | -1.147973 | -0.987370 |
| 1 | -3.875914 | -2.942048 | -0.305207 |
| 1 | -5.615834 | 0.810207  | -1.543853 |
| 1 | -5.770325 | -1.676189 | -1.330458 |
| 7 | 1.645415  | 3.406685  | 0.414508  |
| 6 | 1.413523  | 2.267840  | 0.292218  |
| 7 | 0.089981  | -1.791551 | 2.702324  |
| 6 | -0.228343 | -0.800251 | 2.161984  |

-----  
 Frequencies -- -170.3237  
 Red. masses -- 11.0237  
 Frc consts -- 0.1884  
 IR Inten -- 360.2726

**Structure S32. int13**

E(RB3LYP)sol = -819.709712887 E(RB3LYP)gas = -  
 818.730196076

-----  

|   |          |           |           |
|---|----------|-----------|-----------|
| 6 | 4.064012 | -2.427823 | 0.388825  |
| 6 | 4.557705 | -1.170708 | -0.001014 |
| 6 | 3.718681 | -0.071103 | -0.129016 |
| 6 | 2.314963 | -0.155454 | 0.128120  |
| 6 | 1.836582 | -1.446232 | 0.506427  |

|   |           |           |           |
|---|-----------|-----------|-----------|
| 6 | 2.691798  | -2.541299 | 0.636587  |
| 1 | 4.729215  | -3.290098 | 0.487242  |
| 1 | 5.626900  | -1.047231 | -0.206740 |
| 1 | 4.134006  | 0.894474  | -0.428826 |
| 1 | 0.769612  | -1.604975 | 0.680554  |
| 1 | 2.269093  | -3.509059 | 0.929009  |
| 6 | 1.451146  | 0.991529  | 0.002094  |
| 1 | 0.480291  | 0.370341  | -1.910443 |
| 6 | -0.003416 | 0.880329  | 0.406349  |
| 1 | -0.077368 | 0.228011  | 1.298562  |
| 6 | -0.920290 | 0.224943  | -0.686328 |
| 7 | -0.494675 | 0.027709  | -1.867037 |
| 6 | -2.301242 | -0.225246 | -0.317316 |
| 6 | -2.844912 | -0.057040 | 0.968353  |
| 6 | -3.089564 | -0.864812 | -1.294700 |
| 6 | -4.133594 | -0.513517 | 1.266349  |
| 1 | -2.277023 | 0.448515  | 1.749456  |
| 6 | -4.372829 | -1.318703 | -0.998092 |
| 1 | -2.656028 | -0.992312 | -2.288097 |
| 6 | -4.902550 | -1.146022 | 0.287564  |
| 1 | -4.536988 | -0.367142 | 2.272137  |
| 1 | -4.966903 | -1.812314 | -1.772849 |
| 1 | -5.910023 | -1.501608 | 0.522178  |
| 7 | 2.406276  | 3.238188  | -0.831950 |
| 6 | 1.957900  | 2.224608  | -0.445331 |
| 7 | -1.087379 | 3.148060  | 1.181147  |
| 6 | -0.583446 | 2.164165  | 0.829914  |

-----

# References

1. (a) B.-C. Da, Q.-J. Liang, Y.-C. Luo, T. Ahmad, Y.-H. Xu and T.-P. Loh, *ACS Catalysis*, 2018, **8**, 6239; (b) Z. Shi, P. Yu, T. P. Loh and G. Zhong, *Angew Chem Int Ed Engl*, 2012, **51**, 7825.
2. Z. Shi, Q. Tong, W. W. Leong and G. Zhong, *Chemistry*, 2012, **18**, 9802.
3. E. E. Galenko, S. A. Linnik, O. V. Khoroshilova, M. S. Novikov and A. F. Khlebnikov, *J Org Chem*, 2019, **84**, 11275.
4. (a) A. D. Becke, *The Journal of Chemical Physics*, 1993, **98**, 5648; (b) C. Lee, W. Yang and R. G. Parr, *Physical Review B*, 1988, **37**, 785.
5. (a) S. Grimme, J. Antony, S. Ehrlich and H. Krieg, *The Journal of Chemical Physics*, 2010, **132**, 154104; (b) S. Grimme, S. Ehrlich and L. Goerigk, *Journal of Computational Chemistry*, 2011, **32**, 1456.
6. A. V. Marenich, C. J. Cramer and D. G. Truhlar, *The Journal of Physical Chemistry B*, 2009, **113**, 6378.
7. (a) F. Weigend and R. Ahlrichs, *Physical Chemistry Chemical Physics*, 2005, **7**, 3297; (b) F. Weigend, *Physical Chemistry Chemical Physics*, 2006, **8**, 1057.
8. E. Besalú and J. M. Bofill, *Theoretical Chemistry Accounts*, 1998, **100**, 265.
9. K. Fukui, *Accounts of Chemical Research*, 1981, **14**, 363.
10. M. J. Frisch, G. W. Trucks, H. B. Schlegel, G. E. Scuseria, M. A. Robb, J. R. Cheeseman, G. Scalmani, V. Barone, B. Mennucci, G. A. Petersson, H. Nakatsuji, M. Caricato, X. Li, H. P. Hratchian, A. F. Izmaylov, J. Bloino, G. Zheng, J. L. Sonnenberg, M. Hada, M. Ehara, K. Toyota, R. Fukuda, J. Hasegawa, M. Ishida, T. Nakajima, Y. Honda, O. Kitao, H. Nakai, T. Vreven, J. A. Montgomery Jr., J. E. Peralta, F. Ogliaro, M. J. Bearpark, J. Heyd, E. N. Brothers, K. N. Kudin, V. N. Staroverov, R. Kobayashi, J. Normand, K. Raghavachari, A. P. Rendell, J. C. Burant, S. S. Iyengar, J. Tomasi, M. Cossi, N. Rega, N. J. Millam, M. Klene, J. E. Knox, J. B. Cross, V. Bakken, C. Adamo, J. Jaramillo, R. Gomperts, R. E. Stratmann, O. Yazyev, A. J. Austin, R. Cammi, C. Pomelli, J. W. Ochterski, R. L. Martin, K. Morokuma, V. G. Zakrzewski, G. A. Voth, P. Salvador, J. J. Dannenberg, S. Dapprich, A. D. Daniels, Ö. Farkas, J. B. Foresman, J. V. Ortiz, J. Cioslowski and D. J. Fox, *Journal*, 2013.
